# Supplementary material for: Synthesis of 1,2-diaminotruxinic δ-cyclobutanes by BF3-controlled [2 + 2]-photocycloaddition of 5(4H)-oxazolones and stereoselective expansion of δ-cyclobutanes to give highly substituted pyrrolidine-2,5-dicarboxylates
Source: Royal Society of Chemistry journal article supplement (doi:10.1039/d3ob00284e), 2023-01-01
Supplement: d3ob00284e1.pdf [file d3ob00284e1.pdf]

**Synthesis of 1,2-diaminotruxinic  $\delta$ -cyclobutanes by  $\text{BF}_3$ -controlled [2+2]-  
photocycloaddition of 5(4*H*)-oxazolones. Stereoselective expansion of  $\delta$ -  
cyclobutanes to give highly substituted pyrrolidine-2,5-dicarboxylates**

Sonia Sierra,<sup>1</sup> Rosa López,<sup>2</sup> Enrique Gómez-Bengoa,<sup>2</sup> Larry Falvello,<sup>1</sup> Esteban P. Urriolabeitia\*<sup>1</sup>

*1 Instituto de Síntesis Química y Catálisis Homogénea, ISQCH (CSIC - Universidad de Zaragoza), 50009  
Zaragoza (Spain)*

*2 Departamento de Química Orgánica I, Universidad del País Vasco, UPV-EHU, CP-20080 Donostia-San  
Sebastián, Spain*

**Electronic Supplementary Information**

**Table of Contents**

|                                                                                                                                                        |             |
|--------------------------------------------------------------------------------------------------------------------------------------------------------|-------------|
| <b>1.- Complete experimental section</b>                                                                                                               | <b>S1</b>   |
| <b>2.- References for the ESI</b>                                                                                                                      | <b>S16</b>  |
| <b>3.- <sup>1</sup>H NMR control spectra of starting (<i>Z</i>)-4-arylidene-2-phenyl-5(4<i>H</i>)-oxazolones 1a-1u</b>                                 | <b>S18</b>  |
| <b>4.- Copies of NMR spectra of delta-1,2-diaminotruxinic derivatives 2a-2u</b>                                                                        | <b>S29</b>  |
| <b>5.- <sup>1</sup>H NMR spectra of crudes during the synthesis of cyclobutanes 2a-2u<br/>(after washing with water, before column chromatography)</b> | <b>S76</b>  |
| <b>6.- Copies of NMR spectra of the pyrrolidine derivatives 3a-3r</b>                                                                                  | <b>S86</b>  |
| <b>7.- Cartesian coordinates and energies of the anionic species calculated by DFT</b>                                                                 | <b>S110</b> |

## 1.- Complete experimental section

**General Methods.** The [2+2]-photocycloaddition reactions were carried out under inert (Ar) atmosphere, using dry and deoxygenated methanol from a Pure Solv MD5 solvent purification system. The purification of the compounds was carried out by flash column liquid chromatographies using silica gel (70-230  $\mu\text{m}$ ) as support.  $^1\text{H}$ ,  $^{13}\text{C}$  and  $^{19}\text{F}$  NMR spectra of the isolated products **2** and **3** were recorded in  $\text{CDCl}_3$  or  $\text{CD}_2\text{Cl}_2$  solutions at 25 °C (other temperatures were specified) on Bruker AV300 and Bruker AV500 spectrometers ( $\delta$  in ppm,  $J$  in Hz) at  $^1\text{H}$  operating frequencies of 300.13 and 500.13 MHz, respectively.  $^1\text{H}$  and  $^{13}\text{C}$  NMR spectra were referenced using the solvent signal as internal standard, while  $^{19}\text{F}$  NMR spectra were referenced to  $\text{CFCl}_3$ . The assignment of  $^1\text{H}$  NMR peaks has been performed through standard 2D  $^1\text{H}$ -COSY and selective 1D  $^1\text{H}$ -SELNOE experiments. Typical mixing times in the case of selective 1D-SELNOE experiments were in the range 1.2-1.8 s, as a function of the irradiated signal. These values of optimized mixing times were set equal to the longitudinal relaxation time  $T_1$ , determined using the inversion-recovery sequence. The  $^{13}\text{C}$  NMR peaks were identified using standard  $^1\text{H}$ - $^{13}\text{C}$  edited-HSQC and  $^1\text{H}$ - $^{13}\text{C}$  HMBC 2D-experiments. In both cases spectral widths of 10 ppm ( $^1\text{H}$ ) and 200 ppm ( $^{13}\text{C}$ ) were used, with averaged values of the coupling constants  $^1J_{\text{CH}} = 145$  Hz and long-range  $^nJ_{\text{CH}} = 10$  Hz. ESI (ESI<sup>+</sup>) mass spectra were recorded using an Esquire 3000 ion-trap mass spectrometer (Bruker Daltonic GmbH) equipped with a standard ESI/APCI source. HRMS and ESI (ESI<sup>+</sup>) mass spectra were recorded using an MicroToF Q, API-Q-ToF ESI with a mass range from 20 to 3000  $m/z$  and mass resolution 15000 (FWHM). The oxazolones **1** used as starting materials were synthesized according to published methods.<sup>1</sup> The compound  $[\text{Ru}(\text{bpy})_3](\text{BF}_4)_2$  was also prepared following published procedures,<sup>2</sup> and it was stored under protecting atmosphere (Ar) at 4 °C.

**Irradiation setup.** The irradiation setup used in this case was a metallic cylindrical recipient (16 cm internal diameter and 10.5 cm high) whose internal surface was covered with blue LEDs (222 diodes, 465 nm). This home-made system provided a electrical power of 18W and used a 12V power supply.

**X-ray diffraction.** Crystals of cyclobutanes **2n**, **2o**, **2s** and pyrrolidine **3r** of quality for X-ray measurements were grown by slow diffusion of *n*-pentane into  $\text{CH}_2\text{Cl}_2$  (**2n**, **2o**, **2s**) or  $\text{CHCl}_3$  (**3r**) solutions of the respective crude products at -18 °C for several weeks. One selected single crystal of each compound was mounted at the end of a quartz fiber in a random orientation, covered with perfluorinated oil and placed under a cold

stream of N<sub>2</sub> gas. The data collection were performed at 123 K (**2s**, **3r**) or 153 K (**2n**, **2o**) on Oxford Diffraction Xcalibur Sapphire 3 (**2n**, **3r**), Bruker P4 (**2o**) or Bruker APEX Duo (**2s**) diffractometers, using graphite-monochromated Mo-K $\alpha$  radiation ( $\lambda = 0.71073 \text{ \AA}$ ). A hemisphere of data was collected based on  $\omega$ -scan and  $\phi$ -scan runs. The diffraction frames were integrated using the programs CrysAlis RED<sup>3</sup> or SAINT<sup>4</sup> and the integrated intensities were corrected for absorption with SADABS.<sup>5</sup> The structures were solved and developed by Fourier methods.<sup>6</sup> All non-hydrogen atoms were refined with anisotropic displacement parameters. The H atoms were placed at idealized positions and treated as riding atoms. Each H atom was assigned an isotropic displacement parameter equal to 1.2 times the equivalent isotropic displacement parameter of its parent atom. For structure solving and refinement the SHELX-97<sup>7</sup> Software Package was used. The structures were refined to  $F_o^2$  and all reflections were used in the least-squares calculations.<sup>8</sup> CCDC-2177354 (**2o**), CCDC-2177355 (**2s**), and CCDC-2176207 (**3r**) contains the supplementary crystallographic data for this paper. These data can be obtained free of charge from The Cambridge Crystallographic Data Centre via [www.ccdc.cam.ac.uk/data\\_request/cif](http://www.ccdc.cam.ac.uk/data_request/cif). The structure of cyclobutane **2n** could be solved, but the low quality of the data avoided a complete refinement, so the structure has to be considered only as a connectivity scheme. For the structure of **3r** it was found a disordered pentane molecule in (1/2, 1/2, 1/2), which was refined using geometrical restraints and constraints for the anisotropic thermal displacement parameters.

### Computational details

All structures were optimized using density functional theory (DFT) as implemented in Gaussian 16,<sup>9</sup> with M06-2X<sup>10</sup> as functional, and 6-311+G(d,p) as basis set, introducing solvation factors with the IEF-PCM<sup>11</sup> method, and methanol as solvent, as in the optimized experimental conditions. The stationary points were characterized by frequency calculations in order to verify that they have the right number of imaginary frequencies.

### Synthesis of the cyclobutane bis(amino acid)s $\delta$ -1,2-diaminotruxinic derivatives **2a-2u**

All bis(amino acid)s containing the 1,2-diaminotruxinic core **2a-2u** have been prepared following the same experimental method, which is exemplified here for **2a**.

*Synthesis of dimethyl-1,2-bis(benzamido)-3,4-diphenylcyclobutane-1,2-dicarboxylate 2a.* The oxazolone **1a** (149.45 mg, 0.60 mmol) and [Ru(bpy)<sub>3</sub>](BF<sub>4</sub>)<sub>2</sub> (11.2 mg, 0.015 mmol) were suspended in deoxygenated and dry methanol (4 mL) under Ar atmosphere at room temperature. This suspension was treated with BF<sub>3</sub>·Et<sub>2</sub>O (34.1 mg, 0.24 mmol), and the resulting mixture was irradiated with blue light (465 nm, see irradiation setup) for 25 h at room temperature. After the reaction time the solvent was evaporated to dryness, and the solid residue was suspended in chloroform (10 mL). This suspension was washed with water (3 × 5 mL) and the organic phase was dried with anhydrous MgSO<sub>4</sub>. The resulting solution, which contains cyclobutane **2a**, was purified by column chromatography using silica as support and a mixture ethyl acetate/n-hexane in gradient from 1/9 to 3/7 ratio. Cyclobutane **2a** was isolated as a white solid by solvent evaporation. Obtained 56.8 mg (34% yield). <sup>1</sup>H NMR (CDCl<sub>3</sub>, 300.13 MHz) δ 8.30 (s, 1H, NH), 7.56 (m, 2H, H<sub>o</sub>, CO-Ph), 7.46 (m, 3H, H<sub>o</sub>, Ph + H<sub>p</sub>, CO-Ph), 7.39-7.27 (m, 5H, H<sub>m</sub>, Ph+ H<sub>m</sub>, CO-Ph + H<sub>p</sub>, Ph), 4.93 (s, 1H, CH), 3.73 (s, 3H, OCH<sub>3</sub>). <sup>13</sup>C{<sup>1</sup>H} NMR (CDCl<sub>3</sub>, 75.5 MHz) δ 171.6, 166.7, 134.7, 133.3, 131.9, 129.1, 128.7, 128.6, 128.2, 127.0, 64.1, 53.1, 47.6. HRMS (ESI<sup>+</sup>) m/z calcd for C<sub>34</sub>H<sub>30</sub>N<sub>2</sub>NaO<sub>6</sub> [M+Na]<sup>+</sup>: 585.2002, found: 585.1987.

*Synthesis of dimethyl-1,2-bis(benzamido)-3,4-bis(4-methoxyphenyl)cyclobutane-1,2-dicarboxylate 2b.* Cyclobutane **2b** was prepared following the same procedure than that described for **2a**, with small modifications in the chromatographic purification. Oxazolone **1b** (167.45 mg, 0.60 mmol), [Ru(bpy)<sub>3</sub>](BF<sub>4</sub>)<sub>2</sub> (11.2 mg, 0.015 mmol) and BF<sub>3</sub>·Et<sub>2</sub>O (34.1 mg, 0.24 mmol) were irradiated in deoxygenated methanol (4 mL) to give **2b** as a white solid after chromatographic purification (ethyl acetate/n-hexane in 1/9 to 4/6 gradient ratio). Obtained: 64.4 mg (34 % yield). <sup>1</sup>H NMR (CDCl<sub>3</sub>, 300.13 MHz) δ 8.29 (s, 1H, NH), 7.59 (m, 2H, H<sub>o</sub>, Ph), 7.46 (tt, <sup>3</sup>J<sub>HH</sub> = 7.4 Hz, <sup>4</sup>J<sub>HH</sub> = 1.75 Hz, 1H, H<sub>p</sub>, Ph), 7.41-7.33 (m, 4H, H<sub>m</sub>, Ph + H<sub>2</sub>, H<sub>6</sub>, C<sub>6</sub>H<sub>4</sub>), 6.84 (m, 2H, H<sub>3</sub>, H<sub>5</sub>, C<sub>6</sub>H<sub>4</sub>), 4.80 (s, 1H, CH), 3.73 (s, 3H, CH<sub>3</sub>O), 3.72 (s, 3H, COOCH<sub>3</sub>). <sup>13</sup>C{<sup>1</sup>H} NMR (CDCl<sub>3</sub>, 75.5 MHz) δ 171.8, 166.7, 159.4, 133.4, 131.8, 130.2, 128.6, 127.0, 126.7, 114.1, 64.1, 55.3, 53.0, 47.3. HRMS (ESI<sup>+</sup>) m/z calc for C<sub>36</sub>H<sub>34</sub>N<sub>2</sub>NaO<sub>8</sub> [M+Na]<sup>+</sup>: 645.2213, found: 645.2212.

*Synthesis of dimethyl-1,2-bis(benzamido)-3,4-di-p-tolylcyclobutane-1,2-dicarboxylate 2c.*

Cyclobutane **2c** was prepared following the same procedure than that described for **2a**, with small modifications in the chromatographic purification. Oxazolone **1c** (157.85 mg, 0.60 mmol), [Ru(bpy)<sub>3</sub>](BF<sub>4</sub>)<sub>2</sub> (11.2 mg, 0.015 mmol) and BF<sub>3</sub>·Et<sub>2</sub>O (34.1 mg, 0.24 mmol) were irradiated in deoxygenated methanol (4



mL) to give **2c** as a white solid after chromatographic purification (ethyl acetate/n-hexane in 2/8 to 3/7 gradient ratio). Obtained: 80.0 mg (45 % yield).  $^1\text{H}$  NMR ( $\text{CDCl}_3$ , 300.13 MHz)  $\delta$  8.33 (s, 1H, NH), 7.60 (m, 2H,  $\text{H}_o$ ,  $\text{C}_6\text{H}_5$ ), 7.47 (tt,  $^3J_{\text{HH}} = 7.3$  Hz,  $^4J_{\text{HH}} = 1.5$  Hz, 1H,  $\text{H}_p$ ,  $\text{C}_6\text{H}_5$ ), 7.38 (m, 2H,  $\text{H}_m$ ,  $\text{C}_6\text{H}_5$ ), 7.36 (m, 2H,  $\text{H}_2$ ,  $\text{H}_6$ ,  $\text{C}_6\text{H}_4$ ), 7.12 (m, 2H,  $\text{H}_3$ ,  $\text{H}_5$ ,  $\text{C}_6\text{H}_4$ ), 4.86 (s, 1H, CH), 3.72 (s, 3H,  $\text{COOCH}_3$ ), 2.28 (s, 3H,  $\text{CH}_3$ ).  $^{13}\text{C}\{^1\text{H}\}$  NMR ( $\text{CDCl}_3$ , 75.5 MHz)  $\delta$  171.7, 166.7, 137.8, 133.4, 131.7, 131.6, 129.4, 128.9, 128.5, 127.0, 64.1, 52.9, 47.4, 21.1. HRMS (ESI<sup>+</sup>) m/z calc for  $\text{C}_{36}\text{H}_{34}\text{N}_2\text{NaO}_6$  [M+Na]<sup>+</sup> 613.2315, found: 613.2326.

*Synthesis of dimethyl-1,2-bis(benzamido)-3,4-bis(4-chlorophenyl)cyclobutane-1,2-dicarboxylate 2d.*

Cyclobutane **2d** was prepared following the same procedure than that described for **2a**. Oxazolone **1d** (170.45 mg, 0.60 mmol),  $[\text{Ru}(\text{bpy})_3](\text{BF}_4)_2$  (11.2 mg, 0.015 mmol) and  $\text{BF}_3 \cdot \text{Et}_2\text{O}$  (34.1 mg, 0.24 mmol) were irradiated in deoxygenated methanol (4 mL) to give **2d** as a white solid after chromatographic purification (ethyl acetate/n-hexane in 1/9 to 3/7 gradient ratio). Obtained: 53.4 mg (28 % yield).  $^1\text{H}$  NMR ( $\text{CDCl}_3$ , 300.13 MHz)  $\delta$  8.17 (s, 1H, NH), 7.58 (m, 2H,  $\text{H}_o$ ,  $\text{C}_6\text{H}_5$ ), 7.50 (tt,  $^3J_{\text{HH}} = 7.3$  Hz,  $^4J_{\text{HH}} = 1.4$  Hz, 1H,  $\text{H}_p$ ,  $\text{C}_6\text{H}_5$ ), 7.41 (m, 2H,  $\text{H}_m$ ,  $\text{C}_6\text{H}_5$ ), 7.35-7.38 (m, 2H,  $\text{H}_{2-6}$ ,  $\text{C}_6\text{H}_4\text{Cl}$ ), 7.28 (m, 2H,  $\text{H}_{3-5}$ ,  $\text{C}_6\text{H}_4\text{Cl}$ ), 4.84 (s, 1H, CH), 3.74 (s, 3H,  $\text{COOCH}_3$ ).  $^{13}\text{C}\{^1\text{H}\}$  NMR ( $\text{CDCl}_3$ , 75.5 MHz)  $\delta$  171.3, 166.9, 134.3, 133.0, 132.9, 132.1, 130.3, 129.0, 128.8, 126.9, 64.3, 53.2, 46.9. HRMS (ESI<sup>+</sup>) m/z calc for  $\text{C}_{34}\text{H}_{28}\text{Cl}_2\text{N}_2\text{NaO}_6$  [M+Na]<sup>+</sup> 653.1222, found: 653.1198.

*Synthesis of dimethyl-1,2-bis(benzamido)-3,4-bis(4-fluorophenyl)cyclobutane-1,2-dicarboxylate 2e.*

Cyclobutane **2e** was prepared following the same procedure than that described for **2a**. Oxazolone **1e** (160.85 mg, 0.60 mmol),  $[\text{Ru}(\text{bpy})_3](\text{BF}_4)_2$  (11.2 mg, 0.015 mmol) and  $\text{BF}_3 \cdot \text{Et}_2\text{O}$  (34.1 mg, 0.24 mmol) were irradiated in deoxygenated methanol (4 mL) to give **2e** as a white solid after chromatographic purification (ethyl acetate/n-hexane in 1/9 to 3/7 gradient ratio). Obtained: 41 mg (23 % yield).  $^1\text{H}$  NMR ( $\text{CDCl}_3$ , 300.13 MHz)  $\delta$  8.16 (s, 1H, NH), 7.57 (m, 2H,  $\text{H}_o$ ,  $\text{C}_6\text{H}_5$ ), 7.49 (tt,  $^3J_{\text{HH}} = 7.3$  Hz,  $^4J_{\text{HH}} = 1.5$  Hz, 1H,  $\text{H}_p$ ,  $\text{C}_6\text{H}_5$ ), 7.45-7.35 (m, 4H,  $\text{H}_m$ ,  $\text{C}_6\text{H}_5 + \text{H}_{2-6}$ ,  $\text{C}_6\text{H}_4\text{F}$ ), 7.00 (t,  $^3J_{\text{HH}} = ^3J_{\text{FH}} = 8.7$  Hz, 2H,  $\text{H}_{3-5}$ ,  $\text{C}_6\text{H}_4\text{F}$ ), 4.84 (s, 1H, CH), 3.74 (s, 3H,  $\text{COOCH}_3$ ).  $^{13}\text{C}\{^1\text{H}\}$  NMR ( $\text{CDCl}_3$ , 75.5 MHz)  $\delta$  171.5, 166.8, 162.7, 133.1, 132.1, 130.7, 130.3, 128.8, 127.0, 115.8, 64.2, 53.2, 47.1.  $^{19}\text{F}\{^1\text{H}\}$  NMR ( $\text{CDCl}_3$ , 282.40 MHz)  $\delta$  -113.54 (s). HRMS (ESI<sup>+</sup>) m/z calc for  $\text{C}_{34}\text{H}_{28}\text{F}_2\text{N}_2\text{NaO}_6$  [M+Na]<sup>+</sup> 621.1813, found: 621.1780.

*Synthesis of dimethyl-1,2-bis(benzamido)-3,4-bis(4-bromophenyl)cyclobutane-1,2-dicarboxylate 2f.*

Cyclobutane **2f** was prepared following the same procedure than that described for **2a**, with slight

deviations in the chromatographic purification. Oxazolone **1f** (160.85 mg, 0.60 mmol), [Ru(bpy)<sub>3</sub>](BF<sub>4</sub>)<sub>2</sub> (11.2 mg, 0.015 mmol) and BF<sub>3</sub>·Et<sub>2</sub>O (34.1 mg, 0.24 mmol) were irradiated for 48 h in deoxygenated methanol (4 mL) to give **2f** as a white solid after chromatographic purification (ethyl acetate/n-hexane in 3/7 to 7/3 gradient ratio). Obtained: 35.7 mg (16 % yield). <sup>1</sup>H NMR (CDCl<sub>3</sub>, 300.13 MHz): δ = 8.13 (s, 1H, NH), 7.57 (m, 2H, H<sub>o</sub>, C<sub>6</sub>H<sub>5</sub>), 7.52-7.49 (m, 1H, H<sub>p</sub>, C<sub>6</sub>H<sub>5</sub>), 7.45-7.39 (m, 4H, H<sub>m</sub>, C<sub>6</sub>H<sub>5</sub> + H<sub>3-5</sub>, C<sub>6</sub>H<sub>4</sub>Br), 7.29 (m, 2H, H<sub>2-6</sub>, C<sub>6</sub>H<sub>4</sub>Br), 4.80 (s, 1H, CH), 3.73 (s, 3H, COOCH<sub>3</sub>). <sup>13</sup>C{<sup>1</sup>H} NMR (CDCl<sub>3</sub>, 75.5 MHz): δ 171.3, 167.0, 133.5, 133.1, 132.2, 132.0, 130.7, 128.8, 127.0, 122.6, 64.3, 53.3, 47.0. HRMS (ESI<sup>+</sup>) m/z calc for C<sub>34</sub>H<sub>28</sub>Br<sub>2</sub>N<sub>2</sub>NaO<sub>6</sub> [M+Na]<sup>+</sup> 741.0314, found: 741.0170.

*Synthesis of dimethyl-1,2-bis(benzamido)-3,4-bis(4-cyanophenyl)cyclobutane-1,2-dicarboxylate 2g.*

Cyclobutane **2g** was prepared following the same procedure than that described for **2a**, with minor changes in the chromatographic purification. Oxazolone **1g** (164.4 mg, 0.60 mmol), [Ru(bpy)<sub>3</sub>](BF<sub>4</sub>)<sub>2</sub> (11.2 mg, 0.015 mmol) and BF<sub>3</sub>·Et<sub>2</sub>O (34.1 mg, 0.24 mmol) were irradiated for 25 h in deoxygenated methanol (4 mL) to give **2g** as a white solid after chromatographic purification (ethyl acetate/n-hexane in 3/7 to 7/3 gradient ratio). Obtained: 66.5 mg (36 % yield). <sup>1</sup>H NMR (CDCl<sub>3</sub>, 300.13 MHz) δ 7.94 (s, 1H, NH), 7.61-7.48 (m, 7H, H<sub>o</sub>, H<sub>p</sub>, C<sub>6</sub>H<sub>5</sub> + H<sub>2-6</sub>, H<sub>3-5</sub>, C<sub>6</sub>H<sub>4</sub>), 7.40 (m, 2H, H<sub>m</sub>, C<sub>6</sub>H<sub>5</sub>), 4.97 (s, 1H, CH), 3.77 (s, 3H, COOCH<sub>3</sub>). <sup>13</sup>C{<sup>1</sup>H} NMR (CDCl<sub>3</sub>, 75.5 MHz) δ 170.7, 166.9, 139.6 (2C<sub>i</sub>), 132.5, 132.4, 129.7, 128.9, 126.9, 118.5, 112.3, 64.7, 53.6, 46.8. HRMS (ESI<sup>+</sup>) m/z calc for C<sub>36</sub>H<sub>28</sub>N<sub>4</sub>NaO<sub>6</sub> [M+Na]<sup>+</sup> 635.1907, found: 635.1871.

*Synthesis of dimethyl-1,2-bis(benzamido)-3,4-bis(4-trifluoromethylphenyl)cyclobutane-1,2-dicarboxylate 2h.*

Cyclobutane **2h** was prepared following the same procedure than that described for **2a**, with minor changes in the chromatographic purification. Oxazolone **1h** (190.24 mg, 0.60 mmol), [Ru(bpy)<sub>3</sub>](BF<sub>4</sub>)<sub>2</sub> (11.2 mg, 0.015 mmol) and BF<sub>3</sub>·Et<sub>2</sub>O (34.1 mg, 0.24 mmol) were irradiated for 25 h in deoxygenated methanol (4 mL) to give **2h** as a white solid after chromatographic purification (ethyl acetate/n-hexane in 1/9 to 4/6 gradient ratio). Obtained: 57.7 mg (28 % yield). <sup>1</sup>H NMR (CDCl<sub>3</sub>, 300.13 MHz) δ 8.09 (s, 1H, NH), 7.57 (s, 4H, H<sub>2-6</sub> + H<sub>3-5</sub>, C<sub>6</sub>H<sub>4</sub>-CF<sub>3</sub>), 7.56-7.47 (m, 3H, H<sub>o</sub> + H<sub>p</sub>, C<sub>6</sub>H<sub>5</sub>), 7.39 (m, 2H, H<sub>m</sub>, C<sub>6</sub>H<sub>5</sub>), 4.99 (s, 1H, CH), 3.77 (s, 3H, COOCH<sub>3</sub>). <sup>13</sup>C{<sup>1</sup>H} NMR (CDCl<sub>3</sub>, 75.5 MHz) δ 171.1, 167.0, 138.4, 132.8, 132.3, 130.6, 129.4, 128.8, 126.9, 125.7, 120.4, 64.6, 53.4, 47.0. <sup>19</sup>F{<sup>1</sup>H} NMR (CDCl<sub>3</sub>, 282.40 MHz) δ -62.71 (s). HRMS (ESI<sup>+</sup>) m/z calc for C<sub>36</sub>H<sub>28</sub>F<sub>6</sub>N<sub>2</sub>NaO<sub>6</sub> [M+Na]<sup>+</sup> 721.1749, found: 721.1745.

*Synthesis of dimethyl-1,2-bis(benzamido)-3,4-bis(m-tolyl)cyclobutane-1,2-dicarboxylate 2i.* Cyclobutane **2i** was prepared following the same procedure than that described for **2a**, with minor changes in the chromatographic purification. Oxazolone **1i** (157.85 mg, 0.60 mmol), [Ru(bpy)<sub>3</sub>](BF<sub>4</sub>)<sub>2</sub> (11.2 mg, 0.015 mmol) and BF<sub>3</sub>·Et<sub>2</sub>O (34.1 mg, 0.24 mmol) were irradiated for 25 h in deoxygenated methanol (4 mL) to give **2i** as a white solid after chromatographic purification (ethyl acetate/n-hexane in 3/7 to 6/4 gradient ratio). Obtained: 88.31 mg (50 % yield). <sup>1</sup>H NMR (CDCl<sub>3</sub>, 300.13 MHz) δ 8.33 (s, 1H, NH), 7.57 (m, 2H, H<sub>o</sub>, C<sub>6</sub>H<sub>5</sub>), 7.47 (tt, <sup>3</sup>J<sub>HH</sub> = 7.3 Hz, <sup>4</sup>J<sub>HH</sub> = 1.4 Hz, 1H, H<sub>p</sub>, C<sub>6</sub>H<sub>5</sub>), 7.37 (m, 2H, H<sub>m</sub>, C<sub>6</sub>H<sub>5</sub>), 7.30-7.26 (m, 1H, H<sub>6</sub>, C<sub>6</sub>H<sub>4</sub>), 7.24-7.17 (m, 2H, H<sub>2</sub>, H<sub>5</sub>, C<sub>6</sub>H<sub>4</sub>), 7.08-7.04 (m, 1H, H<sub>4</sub>, C<sub>6</sub>H<sub>4</sub>), 4.85 (s, 1H, CH), 3.72 (s, 3H, COOCH<sub>3</sub>), 2.26 (s, 3H, CH<sub>3</sub>). <sup>13</sup>C{<sup>1</sup>H} NMR (CDCl<sub>3</sub>, 75.5 MHz) δ 171.7, 166.7, 138.4, 134.7, 133.4, 131.9, 129.9, 129.0, 128.7, 128.6, 127.0, 126.3, 64.1, 53.1, 47.7, 21.5. HRMS (ESI<sup>+</sup>) m/z calc for C<sub>36</sub>H<sub>34</sub>N<sub>2</sub>NaO<sub>6</sub> [M+Na]<sup>+</sup> 613.2315, found: 613.2281.

*Synthesis of dimethyl-1,2-bis(benzamido)-3,4-bis(3-chlorophenyl)cyclobutane-1,2-dicarboxylate 2j.* Cyclobutane **2j** was prepared following the same procedure than that described for **2a**, with minor changes in the chromatographic purification. Oxazolone **1j** (170.45 mg, 0.60 mmol), [Ru(bpy)<sub>3</sub>](BF<sub>4</sub>)<sub>2</sub> (11.2 mg, 0.015 mmol) and BF<sub>3</sub>·Et<sub>2</sub>O (34.1 mg, 0.24 mmol) were irradiated for 25 h in deoxygenated methanol (4 mL) to give **2j** as a white solid after chromatographic purification (ethyl acetate/n-hexane in 2/8 to 5/5 gradient ratio). Obtained: 67 mg (35 % yield). <sup>1</sup>H NMR (CDCl<sub>3</sub>, 300.13 MHz) δ 8.15 (s, 1H, NH), 7.56 (m, 2H, H<sub>o</sub>, C<sub>6</sub>H<sub>5</sub>), 7.45 (tt, <sup>3</sup>J<sub>HH</sub> = 7.4 Hz, <sup>4</sup>J<sub>HH</sub> = 1.5 Hz, 1H, H<sub>p</sub>, C<sub>6</sub>H<sub>5</sub>), 7.40-7.32 (m, 4H, H<sub>m</sub>, C<sub>6</sub>H<sub>5</sub> + H<sub>2</sub>, H<sub>6</sub>, C<sub>6</sub>H<sub>4</sub>Cl), 7.22 (m, 2H, H<sub>4</sub>, H<sub>5</sub>, C<sub>6</sub>H<sub>4</sub>Cl), 4.81 (s, 1H, CH), 3.72 (s, 3H, COOCH<sub>3</sub>). <sup>13</sup>C{<sup>1</sup>H} NMR (CDCl<sub>3</sub>, 75.5 MHz) δ 171.2, 166.9, 136.5, 134.7, 133.0, 132.1, 130.0, 129.0, 128.7, 128.6, 127.3, 126.9, 64.2, 53.3, 47.0. HRMS (ESI<sup>+</sup>) m/z calc for C<sub>34</sub>H<sub>28</sub>Cl<sub>2</sub>N<sub>2</sub>NaO<sub>6</sub> [M+Na]<sup>+</sup> 653.1222, found: 653.1195.

*Synthesis of dimethyl-1,2-bis(benzamido)-3,4-bis(3-fluorophenyl)cyclobutane-1,2-dicarboxylate 2k.* Cyclobutane **2k** was prepared following the same procedure than that described for **2a**, with minor changes in the chromatographic purification. Oxazolone **1k** (180.14 mg, 0.60 mmol), [Ru(bpy)<sub>3</sub>](BF<sub>4</sub>)<sub>2</sub> (11.2 mg, 0.015 mmol) and BF<sub>3</sub>·Et<sub>2</sub>O (34.1 mg, 0.24 mmol) were irradiated for 25 h in deoxygenated methanol (4 mL) to give **2k** as a white solid after chromatographic purification (ethyl acetate/n-hexane in 3/7 to 7/3 gradient ratio). Obtained: 63.6 mg (35 % yield). <sup>1</sup>H NMR (CDCl<sub>3</sub>, 300.13 MHz) δ 8.20 (s, 1H, NH), 7.58 (m, 2H, H<sub>o</sub>, C<sub>6</sub>H<sub>5</sub>), 7.49

(m, 1H, H<sub>p</sub>, C<sub>6</sub>H<sub>5</sub>), 7.39 (m, 2H, H<sub>m</sub>, C<sub>6</sub>H<sub>5</sub>), 7.32-7.23 (m, 2H, H<sub>6</sub>, H<sub>5</sub>, C<sub>6</sub>H<sub>4</sub>F), 7.14 (m, 1H, H<sub>2</sub>, C<sub>6</sub>H<sub>4</sub>F), 6.97 (m, 1H, H<sub>4</sub>, C<sub>6</sub>H<sub>4</sub>F), 4.85 (s, 1H, CH), 3.74 (s, 3H, COOCH<sub>3</sub>). <sup>13</sup>C{<sup>1</sup>H} NMR (CDCl<sub>3</sub>, 75.5 MHz) δ 171.3, 166.9, 162.9, 137.1, 133.1, 132.1, 130.4, 128.8, 127.0, 124.8, 116.1, 115.4, 64.3, 53.3, 47.2. <sup>19</sup>F{<sup>1</sup>H} NMR (CDCl<sub>3</sub>, 282.40 MHz) δ -112.12 (s). HRMS (ESI<sup>+</sup>) m/z calc for C<sub>34</sub>H<sub>28</sub>F<sub>2</sub>N<sub>2</sub>NaO<sub>6</sub> [M+Na]<sup>+</sup> 621.1813, found 621.1873.

*Synthesis of dimethyl-1,2-bis(benzamido)-3,4-bis(3-bromophenyl)cyclobutane-1,2-dicarboxylate 2l.*

Cyclobutane **2l** was prepared following the same procedure than that described for **2a**, with minor changes in the chromatographic purification. Oxazolone **1l** (197.40 mg, 0.60 mmol), [Ru(bpy)<sub>3</sub>](BF<sub>4</sub>)<sub>2</sub> (11.2 mg, 0.015 mmol) and BF<sub>3</sub>·Et<sub>2</sub>O (34.1 mg, 0.24 mmol) were irradiated for 25 h in deoxygenated methanol (4 mL) to give **2l** as a white solid after chromatographic purification (ethyl acetate/n-hexane in 3/7 to 5/5 gradient ratio). Obtained: 93.5 mg (43 % yield). <sup>1</sup>H NMR (CDCl<sub>3</sub>, 300.13 MHz) δ 8.16 (s, 1H, NH), 7.61-7.55 (m, 3H, H<sub>o</sub>, C<sub>6</sub>H<sub>5</sub> + H<sub>2</sub>, C<sub>6</sub>H<sub>4</sub>Br), 7.49 (tt, <sup>3</sup>J<sub>HH</sub> = 7.3 Hz, <sup>4</sup>J<sub>HH</sub> = 1.3 Hz, 1H, H<sub>p</sub>, C<sub>6</sub>H<sub>5</sub>), 7.43-7.37 (m, 4H, H<sub>m</sub>, C<sub>6</sub>H<sub>5</sub> + H<sub>4</sub>, H<sub>6</sub>, C<sub>6</sub>H<sub>4</sub>Br), 7.20 (m, 1H, H<sub>5</sub>, C<sub>6</sub>H<sub>4</sub>Br), 4.82 (s, 1H, CH), 3.75 (s, 3H, COOCH<sub>3</sub>). <sup>13</sup>C{<sup>1</sup>H} NMR (CDCl<sub>3</sub>, 75.5 MHz) δ 171.1, 166.9, 136.7, 133.0, 132.1, 131.9, 131.5, 130.3, 128.8, 127.9, 127.0, 122.9, 64.2, 53.3, 47.0. HRMS (ESI<sup>+</sup>) m/z calc for C<sub>34</sub>H<sub>28</sub>Br<sub>2</sub>N<sub>2</sub>NaO<sub>6</sub> [M+Na]<sup>+</sup> 741.0212, found 741.0228.

*Synthesis of dimethyl-1,2-bis(benzamido)-3,4-bis(3-trifluoromethylphenyl)cyclobutane-1,2-dicarboxylate 2m.*

Cyclobutane **2m** was prepared following the same procedure than that described for **2a**, with minor changes in the chromatographic purification. Oxazolone **1m** (190.24 mg, 0.60 mmol), [Ru(bpy)<sub>3</sub>](BF<sub>4</sub>)<sub>2</sub> (11.2 mg, 0.015 mmol) and BF<sub>3</sub>·Et<sub>2</sub>O (34.1 mg, 0.24 mmol) were irradiated for 25 h in deoxygenated methanol (4 mL) to give **2m** as a white solid after chromatographic purification (ethyl acetate/n-hexane in 3/7 to 5/5 gradient ratio). Obtained: 80.5 mg (38 % yield). <sup>1</sup>H NMR (CDCl<sub>3</sub>, 300.13 MHz) δ 8.08 (s, 1H, NH), 7.71-7.66 (m, 2H, H<sub>6</sub> + H<sub>2</sub>, C<sub>6</sub>H<sub>4</sub>-CF<sub>3</sub>), 7.57-7.45 (m, 5H, H<sub>o</sub> + H<sub>p</sub>, C<sub>6</sub>H<sub>5</sub> + H<sub>4</sub> + H<sub>5</sub>, C<sub>6</sub>H<sub>4</sub>-CF<sub>3</sub>), 7.38 (m, 2H, H<sub>m</sub>, C<sub>6</sub>H<sub>5</sub>), 4.98 (s, 1H, CH), 3.77 (s, 3H, COOCH<sub>3</sub>). <sup>13</sup>C{<sup>1</sup>H} NMR (CDCl<sub>3</sub>, 75.5 MHz) δ 171.1, 166.9, 135.5, 132.9, 132.8, 132.3, 131.1, 129.4, 128.8, 126.9, 125.4, 125.3, 123.9, 64.4, 53.4, 47.0. <sup>19</sup>F{<sup>1</sup>H} NMR (CDCl<sub>3</sub>, 282.40 MHz) δ -62.72. HRMS (ESI<sup>+</sup>) m/z calc for C<sub>36</sub>H<sub>28</sub>F<sub>6</sub>N<sub>2</sub>NaO<sub>6</sub> [M+Na]<sup>+</sup> 721.1749, found 721.1712.

*Synthesis of dimethyl-1,2-bis(benzamido)-3,4-bis(2-methoxyphenyl)cyclobutane-1,2-dicarboxylate 2n.*

Cyclobutane **2n** was prepared following the same procedure than that described for **2a**, with minor changes in the chromatographic purification and using an optimized reaction time. Oxazolone **1n** (167.45 mg, 0.60

mmol), [Ru(bpy)<sub>3</sub>](BF<sub>4</sub>)<sub>2</sub> (11.2 mg, 0.015 mmol) and BF<sub>3</sub>·Et<sub>2</sub>O (34.1 mg, 0.24 mmol) were irradiated for 60 h in deoxygenated methanol (4 mL) to give **2n** as a white solid after chromatographic purification (ethyl acetate/n-hexane in 3/7 to 5/5 gradient ratio). Obtained: 78.4 mg (42 % yield). <sup>1</sup>H NMR (CDCl<sub>3</sub>, 300.13 MHz) δ 8.39 (s, 1H, NH), 7.61(m, 3H, H<sub>o</sub>, C<sub>6</sub>H<sub>5</sub>), 7.48-7.35 (m, 4H, H<sub>m</sub> + H<sub>p</sub>, C<sub>6</sub>H<sub>5</sub> + H<sub>6</sub>, C<sub>6</sub>H<sub>4</sub>), 7.23 (m, 1H, H<sub>4</sub>, C<sub>6</sub>H<sub>4</sub>), 6.87 (m, 2H, H<sub>3</sub> + H<sub>5</sub>, C<sub>6</sub>H<sub>4</sub>), 5.38 (s, 1H, CH), 3.87 (s, 3H, CH<sub>3</sub>O), 3.67 (s, 3H, COOCH<sub>3</sub>). <sup>13</sup>C{<sup>1</sup>H} NMR (CDCl<sub>3</sub>, 75.5 MHz) δ 171.2, 166.8, 158.8, 134.1, 131.6, 129.4, 128.8, 128.6, 127.1, 123.5, 120.7, 111.2, 64.6, 56.1, 52.8, 40.8. HRMS (ESI<sup>+</sup>) m/z calc for C<sub>36</sub>H<sub>34</sub>N<sub>2</sub>NaO<sub>8</sub> [M+Na]<sup>+</sup> 645.2213, found 645.2253.

*Synthesis of dimethyl-1,2-bis(benzamido)-3,4-bis(2-fluorophenyl)cyclobutane-1,2-dicarboxylate 2o.*

Cyclobutane **2o** was prepared following the same procedure than that described for **2a**, with minor changes in the chromatographic purification and using an optimized reaction time. Oxazolone **1o** (160.85 mg, 0.60 mmol), [Ru(bpy)<sub>3</sub>](BF<sub>4</sub>)<sub>2</sub> (11.2 mg, 0.015 mmol) and BF<sub>3</sub>·Et<sub>2</sub>O (34.1 mg, 0.24 mmol) were irradiated for 48 h in deoxygenated methanol (4 mL) to give **2o** as a white solid after chromatographic purification (ethyl acetate/n-hexane in 3/7 to 4/6 gradient ratio). Obtained: 55.8 mg (31 % yield). <sup>1</sup>H NMR (CDCl<sub>3</sub>, 300.13 MHz): δ 8.29 (s, 1H, NH), 7.61 (m, 2H, H<sub>o</sub>, C<sub>6</sub>H<sub>5</sub>), 7.55-7.46 (m, 2H, H<sub>p</sub>, C<sub>6</sub>H<sub>5</sub> + H<sub>5</sub>, C<sub>6</sub>H<sub>4</sub>F), 7.39 (m, 2H, H<sub>m</sub>, C<sub>6</sub>H<sub>5</sub>), 7.30-7.22 (m, 1H, H<sub>4</sub>, C<sub>6</sub>H<sub>4</sub>F), 7.11-7.02 (m, 2H, H<sub>3</sub> + H<sub>6</sub>, C<sub>6</sub>H<sub>4</sub>F), 5.29 (s, 1H, CH), 3.71 (s, 3H, COOCH<sub>3</sub>). <sup>13</sup>C{<sup>1</sup>H} NMR (CDCl<sub>3</sub>, 75.5 MHz) δ 170.9, 167.0, 162.0, 133.4, 132.0, 130.2, 129.1, 128.7, 127.1, 124.3, 121.7, 115.9, 64.4, 53.1, 40.0. <sup>19</sup>F{<sup>1</sup>H} NMR (CDCl<sub>3</sub>, 282.40 MHz) δ -114.71. HRMS (ESI<sup>+</sup>) m/z calc for C<sub>34</sub>H<sub>28</sub>F<sub>2</sub>N<sub>2</sub>NaO<sub>6</sub> [M+Na]<sup>+</sup> 621.1813, found 621.1783.

*Synthesis of dimethyl-1,2-bis(benzamido)-3,4-bis(3,4-dimethoxyphenyl)cyclobutane-1,2-dicarboxylate 2p.*

Cyclobutane **2p** was prepared following the same procedure than that described for **2a**, with minor changes in the chromatographic purification. Oxazolone **1p** (185.46 mg, 0.60 mmol), [Ru(bpy)<sub>3</sub>](BF<sub>4</sub>)<sub>2</sub> (11.2 mg, 0.015 mmol) and BF<sub>3</sub>·Et<sub>2</sub>O (34.1 mg, 0.24 mmol) were irradiated for 25 h in deoxygenated methanol (4 mL) to give **2p** as a white solid after chromatographic purification (ethyl acetate/n-hexane in 2/8 to 5/5 gradient ratio). Obtained: 94.2 mg (46 % yield). <sup>1</sup>H NMR (CDCl<sub>3</sub>, 300.13 MHz): δ 8.31 (s, 1H, NH), 7.58 (m, 2H, H<sub>o</sub>, C<sub>6</sub>H<sub>5</sub>), 7.45 (tt, <sup>3</sup>J<sub>HH</sub> = 7.5 Hz, <sup>4</sup>J<sub>HH</sub> = 1.4 Hz, 1H, H<sub>p</sub>, C<sub>6</sub>H<sub>5</sub>), 7.38-7.32 (m, 2H, H<sub>m</sub>, C<sub>6</sub>H<sub>5</sub>), 7.01 (dd, <sup>3</sup>J<sub>HH</sub> = 8.2 Hz, <sup>4</sup>J<sub>HH</sub> = 2.1 Hz, 1H, H<sub>6</sub>, C<sub>6</sub>H<sub>3</sub>), 6.94 (d, <sup>4</sup>J<sub>HH</sub> = 2.1 Hz, 1H, H<sub>2</sub>, C<sub>6</sub>H<sub>3</sub>), 6.80 (d, <sup>3</sup>J<sub>HH</sub> = 8.2 Hz, 1H, H<sub>5</sub>, C<sub>6</sub>H<sub>3</sub>), 4.74 (s, 1H, CH), 3.79 (s, 3H, CH<sub>3</sub>O), 3.75 (s, 3H, CH<sub>3</sub>O), 3.70 (s, 3H, COOCH<sub>3</sub>). <sup>13</sup>C{<sup>1</sup>H} NMR (CDCl<sub>3</sub>, 75.5 MHz) δ 171.7, 166.6, 149.0,

148.9, 133.2, 131.9, 128.6, 127.2, 126.9, 121.3, 112.1, 111.1, 64.1, 55.8, 55.8, 52.9, 47.8. HRMS (ESI<sup>+</sup>) m/z calc for C<sub>38</sub>H<sub>38</sub>N<sub>2</sub>NaO<sub>10</sub> [M+Na]<sup>+</sup> 705.2424, found 705.2393.

*Synthesis of dimethyl-1,2-bis(benzamido)-3,4-bis(3,4-dimethylphenyl)cyclobutane-1,2-dicarboxylate 2q.*

Cyclobutane **2q** was prepared following the same procedure than that described for **2a**, with minor changes in the chromatographic purification. Oxazolone **1q** (166.25 mg, 0.60 mmol), [Ru(bpy)<sub>3</sub>](BF<sub>4</sub>)<sub>2</sub> (11.2 mg, 0.015 mmol) and BF<sub>3</sub>·Et<sub>2</sub>O (34.1 mg, 0.24 mmol) were irradiated for 25 h in deoxygenated methanol (4 mL) to give **2q** as a white solid after chromatographic purification (ethyl acetate/n-hexane in 3/7 to 6/4 gradient ratio). Obtained: 56.8 mg (31 % yield). <sup>1</sup>H NMR (CDCl<sub>3</sub>, 300.13 MHz): δ 8.36 (s, 1H, NH), 7.60 (m, 2H, H<sub>o</sub>, C<sub>6</sub>H<sub>5</sub>), 7.47 (tt, <sup>3</sup>J<sub>HH</sub> = 7.4 Hz, <sup>4</sup>J<sub>HH</sub> = 1.5 Hz, 1H, H<sub>p</sub>, C<sub>6</sub>H<sub>5</sub>), 7.39-7.34 (m, 2H, H<sub>m</sub>, C<sub>6</sub>H<sub>5</sub>), 7.23-7.17 (m, H<sub>2</sub> + H<sub>6</sub>, C<sub>6</sub>H<sub>3</sub>), 7.06 (d, <sup>3</sup>J<sub>HH</sub> = 7.3 Hz, 1H, H<sub>5</sub>, C<sub>6</sub>H<sub>3</sub>), 4.80 (s, 1H, CH), 3.71 (s, 3H, COOCH<sub>3</sub>), 2.17 (s, 6H, 2 CH<sub>3</sub>). <sup>13</sup>C{<sup>1</sup>H} NMR (CDCl<sub>3</sub>, 75.5 MHz): δ 171.8, 166.7, 136.8, 136.5, 133.6, 132.1, 131.7, 130.4, 130.0, 128.6, 127.0, 126.5, 64.1, 52.9, 47.7, 19.9, 19.5. HRMS (ESI<sup>+</sup>) m/z calc for C<sub>38</sub>H<sub>38</sub>N<sub>2</sub>NaO<sub>6</sub> [M+Na]<sup>+</sup> 641.2630, found 641.2627.

*Synthesis of dimethyl-1,2-bis(benzamido)-3,4-bis(3,4-dichlorophenyl)cyclobutane-1,2-dicarboxylate 2r.*

Cyclobutane **2r** was prepared following the same procedure than that described for **2a**, with minor changes in the chromatographic purification. Oxazolone **1r** (380.5 mg, 1.20 mmol), [Ru(bpy)<sub>3</sub>](BF<sub>4</sub>)<sub>2</sub> (22.4 mg, 0.030 mmol) and BF<sub>3</sub>·Et<sub>2</sub>O (68.2 mg, 0.48 mmol) were irradiated for 25 h in deoxygenated methanol (8 mL) to give **2r** as a white solid after chromatographic purification (ethyl acetate/n-hexane in 3/7 to 6/4 gradient ratio). Obtained: 205.2 mg (49 % yield). <sup>1</sup>H NMR (CDCl<sub>3</sub>, 300.13 MHz) δ 8.06 (s, 1H, NH), 7.58 (m, 2H, H<sub>o</sub>, C<sub>6</sub>H<sub>5</sub>), 7.51 (tt, <sup>3</sup>J<sub>HH</sub> = 7.4 Hz, <sup>4</sup>J<sub>HH</sub> = 1.5 Hz, 1H, H<sub>p</sub>, C<sub>6</sub>H<sub>5</sub>), 7.48 (d, <sup>4</sup>J<sub>HH</sub> = 2.1 Hz, 1H, H<sub>2</sub>, C<sub>6</sub>H<sub>3</sub>Cl<sub>2</sub>), 7.41 (m, 2H, H<sub>m</sub>, C<sub>6</sub>H<sub>5</sub>), 7.38 (d, <sup>3</sup>J<sub>HH</sub> = 8.2 Hz, 1H, H<sub>5</sub>, C<sub>6</sub>H<sub>3</sub>Cl<sub>2</sub>), 7.29 (dd, <sup>3</sup>J<sub>HH</sub> = 8.2 Hz, <sup>4</sup>J<sub>HH</sub> = 2.1 Hz, 1H, H<sub>6</sub>, C<sub>6</sub>H<sub>3</sub>Cl<sub>2</sub>), 4.77 (s, 1H, CH), 3.75 (s, 3H, COOCH<sub>3</sub>). <sup>13</sup>C{<sup>1</sup>H} NMR (CDCl<sub>3</sub>, 75.5 MHz) δ 170.9, 167.0, 134.5, 133.0, 132.7, 132.7, 132.3, 130.7, 128.8, 128.3, 126.9, 64.4, 53.4, 46.5. HRMS (ESI<sup>+</sup>) m/z calc for C<sub>34</sub>H<sub>26</sub>Cl<sub>4</sub>N<sub>2</sub>NaO<sub>6</sub> [M+Na]<sup>+</sup> 721.0437, found 721.0427.

*Synthesis of dimethyl-1,2-bis(benzamido)-3,4-bis(3,5-difluorophenyl)cyclobutane-1,2-dicarboxylate 2s.*

Cyclobutane **2s** was prepared following the same procedure than that described for **2a**, with minor changes in the chromatographic purification. Oxazolone **1s** (171.04 mg, 0.60 mmol), [Ru(bpy)<sub>3</sub>](BF<sub>4</sub>)<sub>2</sub> (11.2 mg, 0.015 mmol) and BF<sub>3</sub>·Et<sub>2</sub>O (34.1 mg, 0.24 mmol) were irradiated for 25 h in deoxygenated methanol (4 mL) to give

**2r** as a white solid after chromatographic purification (ethyl acetate/n-hexane in 2/8 to 7/3 gradient ratio). Obtained: 73.6 mg (38 % yield).  $^1\text{H}$  NMR ( $\text{CDCl}_3$ , 300.13 MHz)  $\delta$  8.08 (s, 1H, NH), 7.60 (m, 2H,  $\text{H}_o$ ,  $\text{C}_6\text{H}_5$ ), 7.52 (tt,  $^3J_{\text{HH}} = 7.3$  Hz,  $^4J_{\text{HH}} = 1.3$  Hz, 1H,  $\text{H}_p$ ,  $\text{C}_6\text{H}_5$ ), 7.42 (m, 2H,  $\text{H}_m$ ,  $\text{C}_6\text{H}_5$ ), 6.96 (m, 2H,  $\text{H}_{2-6}$ ,  $\text{C}_6\text{H}_3\text{F}_2$ ), 6.73 (tt,  $^3J_{\text{HH}} = 8.8$  Hz,  $^4J_{\text{HH}} = 2.3$  Hz, 1H,  $\text{H}_4$ ,  $\text{C}_6\text{H}_3\text{F}_2$ ), 4.77 (s, 1H, CH), 3.76 (s, 3H,  $\text{COOCH}_3$ ).  $^{13}\text{C}\{^1\text{H}\}$  NMR ( $\text{CDCl}_3$ , 75.5 MHz)  $\delta$  170.9, 167.1, 163.2, 138.2, 132.8, 132.4, 128.9, 127.0, 112.0, 104.1, 64.4, 53.5, 47.0.  $^{19}\text{F}\{^1\text{H}\}$  NMR ( $\text{CDCl}_3$ , 282.40 MHz):  $\delta$  -108.42. HRMS (ESI $^+$ ) m/z calc for  $\text{C}_{34}\text{H}_{26}\text{F}_4\text{N}_2\text{NaO}_6$   $[\text{M}+\text{Na}]^+$  657.1625, found 657.1628.

*Synthesis of dimethyl-1,2-bis(benzamido)-3,4-bis(3,4,5-trimethoxyphenyl)cyclobutane-1,2-dicarboxylate 2t.*

Cyclobutane **2t** was prepared following the same procedure than that described for **2a**, with minor changes in the chromatographic purification. Oxazolone **1t** (203.47 mg, 0.60 mmol),  $[\text{Ru}(\text{bpy})_3](\text{BF}_4)_2$  (11.2 mg, 0.015 mmol) and  $\text{BF}_3 \cdot \text{Et}_2\text{O}$  (34.1 mg, 0.24 mmol) were irradiated for 25 h in deoxygenated methanol (4 mL). After the reaction time a precipitate was formed, which was removed by filtration and characterized as the dispyrocyclobutane **2t\***. Yellow solid. Obtained: 38 mg (19% yield) The alcoholic solution was evaporated to dryness and the usual work-up of the resulting residue gave **2t** as a white solid after chromatographic purification (ethyl acetate/n-hexane in 1/9 to 6/4 gradient ratio). Obtained: 96.1 mg (43 % yield).

**Characterization of 2t\*:**  $^1\text{H}$  NMR ( $\text{CDCl}_3$ , 300.13 MHz)  $\delta$  8.04 (m, 2H,  $\text{H}_o$ ,  $\text{C}_6\text{H}_5$ ), 7.59 (tt,  $^3J_{\text{HH}} = 7.4$  Hz,  $^4J_{\text{HH}} = 1.4$  Hz, 1H,  $\text{H}_p$ ,  $\text{C}_6\text{H}_5$ ), 7.49 (m, 2H,  $\text{H}_m$ ,  $\text{C}_6\text{H}_5$ ), 6.94 (m, 2H,  $\text{H}_2$ ,  $\text{H}_6$ ,  $\text{C}_6\text{H}_2$ ), 4.81 (s, 1H, CH), 3.88 (s, 6H,  $\text{CH}_3\text{O}-\text{C}_{3-5}$ ), 3.82 (s, 3H,  $\text{CH}_3\text{O}-\text{C}_4$ ).  $^{13}\text{C}\{^1\text{H}\}$  NMR ( $\text{CDCl}_3$ , 75.5 MHz)  $\delta$  176.1, 161.6, 152.8, 138.3, 133.4, 129.0, 128.2, 127.3, 125.6, 108.1, 73.3, 60.9, 57.2, 56.3. HRMS (ESI $^+$ ) m/z calc for  $\text{C}_{38}\text{H}_{34}\text{N}_2\text{NaO}_{10}$   $[\text{M}+\text{Na}]^+$  701.2111, found 701.2075. **Characterization of 2t:**  $^1\text{H}$  NMR ( $\text{CDCl}_3$ , 300.13 MHz)  $\delta$  8.33 (s, 1H, NH), 7.60 (m, 2H,  $\text{H}_o$ ,  $\text{C}_6\text{H}_5$ ), 7.49 (tt,  $^3J_{\text{HH}} = 7.4$  Hz,  $^4J_{\text{HH}} = 1.3$  Hz, 1H,  $\text{H}_p$ ,  $\text{C}_6\text{H}_5$ ), 7.39 (m, 2H,  $\text{H}_m$ ,  $\text{C}_6\text{H}_5$ ), 6.68 (s, 2H,  $\text{H}_{2-6}$ ,  $\text{C}_6\text{H}_2$ ), 4.69 (s, 1H, CH), 3.77 (s, 3H,  $\text{CH}_3\text{O}$ ), 3.76 (s, 6H,  $\text{CH}_3\text{O}$ ), 3.73 (s, 3H,  $\text{COOCH}_3$ ).  $^{13}\text{C}\{^1\text{H}\}$  NMR ( $\text{CDCl}_3$ , 75.5 MHz)  $\delta$  171.8, 166.6, 153.5, 138.1, 133.2, 132.2, 130.6, 128.8, 126.9, 106.3, 64.2, 61.0, 56.3, 53.2, 48.9. HRMS (ESI $^+$ ) m/z calc for  $\text{C}_{40}\text{H}_{42}\text{N}_2\text{NaO}_{12}$   $[\text{M}+\text{Na}]^+$  765.2635, found 765.2638.

*Synthesis of dimethyl-1,2-bis(benzamido)-3,4-di(2-thienyl)cyclobutane-1,2-dicarboxylate 2u.* Cyclobutane **2u** was prepared following the same procedure than that described for **2a**, with minor changes in the chromatographic purification and using an optimized reaction time. Oxazolone **1u** (153.02 mg, 0.60 mmol),  $[\text{Ru}(\text{bpy})_3](\text{BF}_4)_2$  (11.2 mg, 0.015 mmol) and  $\text{BF}_3 \cdot \text{Et}_2\text{O}$  (34.1 mg, 0.24 mmol) were irradiated for 48 h in

deoxygenated methanol (4 mL) to give **2r** as a white solid after chromatographic purification (ethyl acetate/n-hexane in 3/7 to 6/4 gradient ratio). Obtained: 53.6 mg (31 % yield).  $^1\text{H}$  NMR ( $\text{CDCl}_3$ , 300.13 MHz)  $\delta$  8.32 (s, 1H, NH), 7.57 (m, 2H,  $\text{H}_o$ ,  $\text{C}_6\text{H}_5$ ), 7.41 (tt,  $^3J_{\text{HH}} = 8.2$  Hz,  $^4J_{\text{HH}} = 1.2$  Hz, 1H,  $\text{H}_p$ ,  $\text{C}_6\text{H}_5$ ), 7.35-7.28 (m, 2H,  $\text{H}_m$ ,  $\text{C}_6\text{H}_5$ ), 7.17 (dd,  $^3J_{\text{HH}} = 5.2$  Hz,  $^4J_{\text{HH}} = 1.2$  Hz, 1H,  $\text{H}_3$ ,  $\text{SC}_4\text{H}_3$ ), 7.10 (dd,  $^3J_{\text{HH}} = 3.6$  Hz,  $^4J_{\text{HH}} = 1.2$  Hz, 1H,  $\text{H}_5$ ,  $\text{SC}_4\text{H}_3$ ), 6.89 (dd,  $^3J_{\text{HH}} = 5.2$  Hz,  $^3J_{\text{HH}} = 3.6$  Hz,  $\text{H}_4$ ,  $\text{SC}_4\text{H}_3$ ), 4.90 (s, 1H, CH), 3.64 (s, 3H,  $\text{COOCH}_3$ ).  $^{13}\text{C}\{^1\text{H}\}$  NMR ( $\text{CDCl}_3$ , 75.5 MHz)  $\delta$  171.0, 166.9, 137.3, 133.1, 132.0, 128.6, 127.6, 127.3, 127.1, 126.4, 64.2, 53.1, 46.4. HRMS (ESI<sup>+</sup>)  $m/z$  calc for  $\text{C}_{30}\text{H}_{27}\text{N}_2\text{O}_6\text{S}_2$   $[\text{M}+\text{H}]^+$  575.1311, found 575.1295.

### Expansion of the cyclobutane ring of $\delta$ -1,2-diaminotruxinics: synthesis of pyrrolidines **3**.

All pyrrolidine-2,5-dicarboxylate derivatives **3** have been prepared following the same experimental method, which is detailed here for **3a**.

*Synthesis of dimethyl-2-benzamido-1-benzoyl-3,4-diphenylpyrrolidine-2,5-dicarboxylate 3a.* A solution of  $\delta$ -cyclobutane **2a** (41.8 mg, 0.074 mmol) in methanol (5 mL) was treated with NaOMe (4.06 mg, 0.075 mmol), and the resulting mixture was heated at 110 °C for 1 h in a J-Young Sample Flask. Once cooled, the resulting solution was evaporated to dryness and the solid residue extracted with  $\text{CH}_2\text{Cl}_2$  (3 $\times$ 5 mL). Any insoluble solid was removed at this point by filtration through Celite. The resulting clear solution was evaporated to dryness to give impure pyrrolidine **3a**, which was purified by crystallization from  $\text{CH}_2\text{Cl}_2$ /pentane to give **3a** as a white solid. Obtained: 21.2 mg (51% yield). Pyrrolidine **3a** was characterized by NMR methods as the mixture of two diastereoisomers in 1:0.45 molar ratio. Only the major isomer could be fully characterized by NMR.  $^1\text{H}$  NMR ( $\text{CDCl}_3$ , 300.13 MHz)  $\delta$  8.14 (s, 1H, NH), 7.91 (m, 2H,  $\text{H}_o$ ,  $\text{NHCO-C}_6\text{H}_5$ ), 7.59-7.12 (m, 18H,  $\text{C}_6\text{H}_5$ ), 5.28 (d,  $^3J_{\text{HH}} = 10$  Hz, 1H, H-C<sub>5</sub>), 5.27 (d,  $^3J_{\text{HH}} = 13.1$  Hz, 1H, H-C<sub>3</sub>), 4.27 (dd,  $^3J_{\text{HH}} = 13.1$  Hz,  $^3J_{\text{HH}} = 10$  Hz, 1H, H-C<sub>4</sub>), 3.70 (s, 3H, C<sub>2</sub>- $\text{COOCH}_3$ ), 3.10 (s, 3H, C<sub>5</sub>- $\text{COOCH}_3$ ).  $^{13}\text{C}\{^1\text{H}\}$  NMR ( $\text{CDCl}_3$ , 75.5 MHz)  $\delta$  170.9, 170.8, 169.0, 167.4, 136.2, 135.2, 134.6, 133.0, 132.2, 130.9, 129.0, 129.0, 128.9, 128.7, 128.6, 128.6, 128.4, 128.2, 128.2, 127.4, 81.4, 69.7, 53.4, 53.4, 51.9, 51.8. HRMS (ESI<sup>+</sup>)  $m/z$  calc for  $\text{C}_{34}\text{H}_{30}\text{N}_2\text{NaO}_6$   $[\text{M}+\text{Na}]^+$  585.2002, found 585.2003.

*Synthesis of dimethyl-2-benzamido-1-benzoyl-3,4-bis(4-chlorophenyl)pyrrolidine-2,5-dicarboxylate 3d.* The synthesis of **3d** was carried out following the same synthetic method than that detailed for **3a**. Therefore,  $\delta$ -cyclobutane **2d** (79.4 mg, 0.126 mmol) was reacted with NaOMe (6.75 mg, 0.125 mmol) in MeOH (110



°C) for 1h to give **3d** as a single diastereoisomer after crystallization from CH<sub>2</sub>Cl<sub>2</sub>/pentane. Obtained: 40.1 mg (50% yield). White solid. <sup>1</sup>H NMR (CDCl<sub>3</sub>, 300.13 MHz) δ 8.12 (s, 1H, NH), 7.89 (m, 2H, H<sub>o</sub>, NHCO-C<sub>6</sub>H<sub>5</sub>), 7.63-7.55 (m, 3H, H<sub>p</sub>, NHCO-C<sub>6</sub>H<sub>5</sub> + H<sub>o</sub>, N<sub>1</sub>CO-C<sub>6</sub>H<sub>5</sub>), 7.50 (m, 2H, H<sub>m</sub>, NHCO-C<sub>6</sub>H<sub>5</sub>), 7.38-7.30 (m, 7H, H<sub>p</sub>, H<sub>m</sub>, N<sub>1</sub>CO-C<sub>6</sub>H<sub>5</sub> + H<sub>o</sub>, H<sub>m</sub>, C<sub>4</sub>-C<sub>6</sub>H<sub>4</sub>), 7.22 (m, 2H, H<sub>m</sub>, C<sub>3</sub>-C<sub>6</sub>H<sub>4</sub>), 7.12 (m, 2H, H<sub>o</sub>, C<sub>3</sub>-C<sub>6</sub>H<sub>4</sub>), 5.22 (d, <sup>3</sup>J<sub>HH</sub> = 10 Hz, 1H, H-C<sub>5</sub>), 5.20 (d, <sup>3</sup>J<sub>HH</sub> = 13 Hz, 1H, H-C<sub>3</sub>), 4.17 (dd, <sup>3</sup>J<sub>HH</sub> = 13 Hz, <sup>3</sup>J<sub>HH</sub> = 10 Hz, 1H, H-C<sub>4</sub>), 3.73 (s, 3H, C<sub>2</sub>-COOCH<sub>3</sub>), 3.10 (s, 3H, C<sub>5</sub>-COOCH<sub>3</sub>). <sup>13</sup>C{<sup>1</sup>H}NMR (CDCl<sub>3</sub>, 75.5 MHz) δ 170.6, 169.0, 168.7, 167.6, 135.0, 134.5, 134.4, 134.3, 134.1, 131.3, 132.5, 131.1, 129.8, 129.4, 129.4, 129.0, 128.4, 128.2, 127.3, 81.1, 69.3, 53.6, 52.8, 52.1, 51.4. HRMS (ESI<sup>+</sup>) m/z calc for C<sub>34</sub>H<sub>28</sub>Cl<sub>2</sub>N<sub>2</sub>NaO<sub>6</sub> [M+Na]<sup>+</sup> 653.1222; found: 653.1179.

*Synthesis of dimethyl-2-benzamido-1-benzoyl-3,4-bis(4-fluorophenyl)pyrrolidine-2,5-dicarboxylate 3e.* The synthesis of **3e** was carried out following the same synthetic method than that detailed for **3a**. Therefore, δ-cyclobutane **2e** (46.7 mg, 0.078 mmol) was reacted with NaOMe (4.3 mg, 0.08 mmol) in MeOH (110 °C) for 1h to give **3e** as a single diastereoisomer after crystallization from CH<sub>2</sub>Cl<sub>2</sub>/pentane. Obtained: 21.5 mg (46% yield). <sup>1</sup>H NMR (CDCl<sub>3</sub>, 300.13 MHz) δ 8.12 (s, 1H, NH), 7.89 (m, 2H, H<sub>o</sub>, NHCO-C<sub>6</sub>H<sub>5</sub>), 7.58-7.52 (m, 3H, H<sub>p</sub>, NHCO-C<sub>6</sub>H<sub>5</sub> + H<sub>o</sub>, N<sub>1</sub>CO-C<sub>6</sub>H<sub>5</sub>), 7.48 (m, 2H, H<sub>m</sub>, NHCO-C<sub>6</sub>H<sub>5</sub>), 7.42-7.31 (m, 5H, H<sub>p</sub>, H<sub>m</sub>, N<sub>1</sub>CO-C<sub>6</sub>H<sub>5</sub> + H<sub>o</sub>, C<sub>4</sub>-C<sub>6</sub>H<sub>4</sub>), 7.17 (m, 2H, H<sub>o</sub>, C<sub>3</sub>-C<sub>6</sub>H<sub>4</sub>), 6.95 (m, 4H, H<sub>m</sub>, C<sub>6</sub>H<sub>4</sub>), 5.22 (d, <sup>3</sup>J<sub>HH</sub> = 10.1 Hz, 1H, H-C<sub>5</sub>), 5.20 (d, <sup>3</sup>J<sub>HH</sub> = 13.1 Hz, 1H, H-C<sub>3</sub>), 4.18 (dd, <sup>3</sup>J<sub>HH</sub> = 13.1 Hz, <sup>3</sup>J<sub>HH</sub> = 10.1 Hz, 1H, H-C<sub>4</sub>), 3.72 (s, 3H, C<sub>2</sub>-COOCH<sub>3</sub>), 3.10 (s, 3H, C<sub>5</sub>-COOCH<sub>3</sub>). <sup>13</sup>C NMR (CDCl<sub>3</sub>, 75.5 MHz) δ 170.7, 169.0, 168.8, 167.6, 162.7, 162.5, 135.1, 134.4, 132.4, 131.7, 131.0, 130.1, 129.7, 129.0, 128.6, 128.4, 128.2, 127.3, 116.1, 115.8, 81.2, 69.5, 53.5, 52.8, 52.0, 51.4. <sup>19</sup>F NMR (CDCl<sub>3</sub>, 282.4 MHz) δ -113.47 (m), -113.86 (m). HRMS (ESI<sup>+</sup>) m/z calc for C<sub>34</sub>H<sub>28</sub>F<sub>2</sub>N<sub>2</sub>NaO<sub>6</sub> [M+Na]<sup>+</sup> 621.1813, found 621.1792.

*Synthesis of dimethyl-2-benzamido-1-benzoyl-3,4-bis(4-cyanophenyl)pyrrolidine-2,5-dicarboxylate 3g.* The synthesis of **3g** was carried out following the same synthetic method than that detailed for **3a**. Therefore, δ-cyclobutane **2g** (62 mg, 0.10 mmol) was reacted with NaOMe (5.9 mg, 0.10 mmol) in MeOH (110 °C) for 1h to give **3g** as a mixture of two different diastereoisomers (3.3/1 molar ratio) after crystallization from CH<sub>2</sub>Cl<sub>2</sub>/pentane. Obtained: 41.5 mg (67% yield). Only the major isomer could be fully characterized by NMR spectroscopy. <sup>1</sup>H NMR (CDCl<sub>3</sub>, 400.13 MHz) δ 8.12 (s, 1H, NH), 7.89 (m, 2H, H<sub>o</sub>, NHCO-C<sub>6</sub>H<sub>5</sub>), 7.60-7.47 (m, 14H, C<sub>6</sub>H<sub>5</sub> + C<sub>6</sub>H<sub>4</sub>), 7.34-7.29 (m, 4H, C<sub>6</sub>H<sub>5</sub> + C<sub>6</sub>H<sub>4</sub>), 5.36 (d, <sup>3</sup>J<sub>HH</sub> = 12.9 Hz, 1H, H-C<sub>3</sub>), 5.27 (d, <sup>3</sup>J<sub>HH</sub> = 9.9 Hz, 1H,

H-C<sub>5</sub>), 4.29 (dd, <sup>3</sup>J<sub>HH</sub> = 12.9 Hz, <sup>3</sup>J<sub>HH</sub> = 10 Hz, 1H, H-C<sub>4</sub>), 3.71 (s, 3H, C<sub>2</sub>-COOCH<sub>3</sub>), 3.11 (s, 3H, C<sub>5</sub>-COOCH<sub>3</sub>).  
<sup>13</sup>C{<sup>1</sup>H}NMR (CDCl<sub>3</sub>, 100.6 MHz) δ 170.1, 169.0, 168.2, 167.9, 141.0, 138.0, 134.7, 133.9, 133.1, 132.5, 132.7, 129.2, 129.1 (2C), 128.9, 128.5, 128.1, 127.3, 118.3, 118.2, 112.8, 112.6, 81.1, 69.1, 53.7, 53.1, 52.3, 51.6.  
HRMS (ESI<sup>+</sup>) m/z calc for C<sub>36</sub>H<sub>28</sub>N<sub>4</sub>NaO<sub>6</sub> [M+Na]<sup>+</sup> 635.1907, found: 635.1903.

*Synthesis of dimethyl-2-benzamido-1-benzoyl-3,4-bis(4-(trifluoromethyl)phenyl)pyrrolidine-2,5-dicarboxylate 3h.* The synthesis of **3h** was carried out following the same synthetic method than that detailed for **3a**. Therefore, δ-cyclobutane **2h** (41.5 mg, 0.06 mmol) was reacted with NaOMe (3.2 mg, 0.06 mmol) in MeOH (110 °C) for 1h to give **3h** as a single diastereoisomer after crystallization from CH<sub>2</sub>Cl<sub>2</sub>/pentane. Obtained: 16.1 mg (39% yield). <sup>1</sup>H NMR (CDCl<sub>3</sub>, 300.13 MHz) δ 8.14 (s, 1H, NH), 7.90 (m, 2H, H<sub>o</sub>, NHCO-C<sub>6</sub>H<sub>5</sub>), 7.58-7.52 (m, 3H, H<sub>p</sub>, NHCO-C<sub>6</sub>H<sub>5</sub> + H<sub>o</sub>, N<sub>1</sub>CO-C<sub>6</sub>H<sub>5</sub>), 7.48 (m, 2H, H<sub>m</sub>, NHCO-C<sub>6</sub>H<sub>5</sub>), 7.42-7.31 (m, 5H, H<sub>p</sub>, H<sub>m</sub>, N<sub>1</sub>CO-C<sub>6</sub>H<sub>5</sub> + H<sub>o</sub>, C<sub>4</sub>-C<sub>6</sub>H<sub>4</sub>), 7.17 (m, 2H, H<sub>o</sub>, C<sub>3</sub>-C<sub>6</sub>H<sub>4</sub>), 6.95 (m, 4H, H<sub>m</sub>, C<sub>6</sub>H<sub>4</sub>), 5.37 (d, <sup>3</sup>J<sub>HH</sub> = 13 Hz, 1H, H-C<sub>3</sub>), 5.29 (d, <sup>3</sup>J<sub>HH</sub> = 9.9 Hz, 1H, H-C<sub>5</sub>), 4.32 (dd, <sup>3</sup>J<sub>HH</sub> = 13 Hz, <sup>3</sup>J<sub>HH</sub> = 9.9 Hz, 1H, H-C<sub>4</sub>), 3.71 (s, 3H, C<sub>2</sub>-COOCH<sub>3</sub>), 3.12 (s, 3H, C<sub>5</sub>-COOCH<sub>3</sub>). <sup>13</sup>C NMR (CDCl<sub>3</sub>, 75.5 MHz) δ 170.4, 169.0, 168.5, 167.8, 139.9, 136.8, 134.9, 134.1, 132.6, 131.2, 130.8, 130.6, 129.1, 128.9, 128.5, 128.5, 128.2, 127.3, 126.2, 125.7, 120.3, 120.3, 81.2, 69.3, 53.6, 53.1, 52.2, 51.5. <sup>19</sup>F NMR (CDCl<sub>3</sub>, 282.4 MHz) δ -62.71 (s), -62.75 (s). HRMS (ESI<sup>+</sup>) m/z calc for C<sub>36</sub>H<sub>28</sub>F<sub>6</sub>N<sub>2</sub>NaO<sub>6</sub> [M+Na]<sup>+</sup> 721.1752, found 721.1744.

*Synthesis of dimethyl-2-benzamido-1-benzoyl-3,4-bis(3-fluorophenyl)pyrrolidine-2,5-dicarboxylate 3k.* The synthesis of **3k** was carried out following the same synthetic method than that detailed for **3a**. Therefore, δ-cyclobutane **2k** (107.4 mg, 0.18 mmol) was reacted with NaOMe (9.8 mg, 0.18 mmol) in MeOH (110 °C) for 1h to give **3k** as a mixture of two different diastereoisomers (2/1 molar ratio) after crystallization from CH<sub>2</sub>Cl<sub>2</sub>/pentane. Obtained: 78.4 mg (73% yield). Only the major isomer could be fully characterized by NMR spectroscopy. <sup>1</sup>H NMR (CDCl<sub>3</sub>, 300.13 MHz) δ 8.12 (s, 1H, NH), 7.90 (m, 2H, H<sub>o</sub>, NHCO-C<sub>6</sub>H<sub>5</sub>), 7.58-7.53 (m, 3H, H<sub>p</sub>, NHCO-C<sub>6</sub>H<sub>5</sub> + H<sub>o</sub>, N<sub>1</sub>CO-C<sub>6</sub>H<sub>5</sub>), 7.49 (m, 2H, H<sub>m</sub>, NHCO-C<sub>6</sub>H<sub>5</sub>), 7.38-7.35 (m, 3H, H<sub>p</sub>, H<sub>m</sub>, N<sub>1</sub>CO-C<sub>6</sub>H<sub>5</sub>), 7.24-7.20 (m, 2H, C<sub>6</sub>H<sub>4</sub>F), 7.18-7.13 (m, 2H, C<sub>6</sub>H<sub>4</sub>F), 7.01-6.98 (m, 1H, C<sub>6</sub>H<sub>4</sub>F), 6.94-6.91 (m, 3H, C<sub>6</sub>H<sub>4</sub>F), 5.25 (d, <sup>3</sup>J<sub>HH</sub> = 10 Hz, 1H, H-C<sub>5</sub>), 5.23 (d, <sup>3</sup>J<sub>HH</sub> = 13.3 Hz, 1H, H-C<sub>3</sub>), 4.19 (dd, <sup>3</sup>J<sub>HH</sub> = 13. Hz, <sup>3</sup>J<sub>HH</sub> = 10 Hz, 1H, H-C<sub>4</sub>), 3.74 (s, 3H, C<sub>2</sub>-COOCH<sub>3</sub>), 3.12 (s, 3H, C<sub>5</sub>-COOCH<sub>3</sub>). <sup>13</sup>C NMR (CDCl<sub>3</sub>, 75.5 MHz) δ 170.5, 169.0, 168.7, 167.6, 163.1, 162.8, 138.4, 135.4, 135.0, 134.3, 132.4, 131.0, 130.7, 130.2, 129.0, 128.4, 128.2, 127.3, 124.5, 123.8, 115.4,

115.1, 81.1, 69.3, 53.5, 53.0, 52.1, 51.6. <sup>19</sup>F NMR (CDCl<sub>3</sub>, 282.4 MHz) δ -112.00 (m), -112.26 (m). HRMS (ESI<sup>+</sup>) m/z calc for C<sub>34</sub>H<sub>28</sub>F<sub>2</sub>N<sub>2</sub>NaO<sub>6</sub> [M+Na]<sup>+</sup> 621.1813, found 621.1812.

*Synthesis of dimethyl-2-benzamido-1-benzoyl-3,4-bis(3-bromophenyl)pyrrolidine-2,5-dicarboxylate 3l.* The synthesis of **3l** was carried out following the same synthetic method than that detailed for **3a**. Therefore, δ-cyclobutane **2l** (88.0 mg, 0.12 mmol) was reacted with NaOMe (6.7 mg, 0.12 mmol) in MeOH (110 °C) for 1h to give **3l** as a single diastereoisomer after crystallization from CH<sub>2</sub>Cl<sub>2</sub>/pentane. Obtained: 60.5 mg (69% yield). <sup>1</sup>H NMR (CDCl<sub>3</sub>, 300.13 MHz) δ 8.10 (s, 1H, NH), 7.89 (m, 2H, H<sub>o</sub>, NHCO-C<sub>6</sub>H<sub>5</sub>), 7.58-7.53 (m, 4H, H<sub>p</sub>, NHCO-C<sub>6</sub>H<sub>5</sub> + H<sub>o</sub>, N<sub>1</sub>CO-C<sub>6</sub>H<sub>5</sub> + H, C<sub>6</sub>H<sub>4</sub>Br), 7.48 (m, 2H, H<sub>m</sub>, NHCO-C<sub>6</sub>H<sub>5</sub>), 7.39-7.33 (m, 7H, H<sub>m</sub>, H<sub>p</sub>, N<sub>1</sub>CO-C<sub>6</sub>H<sub>5</sub> + C<sub>6</sub>H<sub>4</sub>Br), 7.20-7.12 (m, 3H, C<sub>6</sub>H<sub>4</sub>Br), 5.23 (d, <sup>3</sup>J<sub>HH</sub> = 10 Hz, 1H, H-C<sub>5</sub>), 5.18 (d, <sup>3</sup>J<sub>HH</sub> = 13.1Hz, 1H, H-C<sub>3</sub>), 4.15 (dd, <sup>3</sup>J<sub>HH</sub> = 13.1 Hz, <sup>3</sup>J<sub>HH</sub> = 10 Hz, 1H, H-C<sub>4</sub>), 3.76 (s, 3H, C<sub>2</sub>-COOCH<sub>3</sub>), 3.12 (s, 3H, C<sub>5</sub>-COOCH<sub>3</sub>). <sup>13</sup>C{<sup>1</sup>H}NMR (CDCl<sub>3</sub>, 75.5 MHz) δ 170.5, 169.0, 168.6, 167.6, 138.1, 135.0, 134.9, 134.3, 132.4, 131.7, 131.3, 131.1, 131.6, 131.0, 130.7, 130.3, 129.0, 128.4, 128.2, 127.6, 127.3, 126.7, 123.1, 122.8, 81.2, 69.2, 53.6, 53.0, 52.1, 51.4. HRMS (ESI<sup>+</sup>) m/z calc for C<sub>34</sub>H<sub>28</sub>Br<sub>2</sub>N<sub>2</sub>NaO<sub>6</sub> [M+Na]<sup>+</sup> 741.0212, found 741.0222.

*Synthesis of dimethyl-2-benzamido-1-benzoyl-3,4-bis(3-(trifluoromethyl)phenyl)pyrrolidine-2,5-dicarboxylate 3m.* The synthesis of **3m** was carried out following the same synthetic method than that detailed for **3a**. Therefore, δ-cyclobutane **2m** (80.5 mg, 0.13 mmol) was reacted with NaOMe (7.1 mg, 0.13 mmol) in MeOH (110 °C) for 1h to give **3m** as a single diastereoisomer after crystallization from CH<sub>2</sub>Cl<sub>2</sub>/pentane. Obtained: 16.4 mg (20% yield). <sup>1</sup>H NMR (CDCl<sub>3</sub>, 300.13 MHz): δ 8.12 (s, 1H, NH), 7.90 (m, 2H, H<sub>o</sub>, NHCO-C<sub>6</sub>H<sub>5</sub>), 7.73 (m, 1H, C<sub>6</sub>H<sub>4</sub>), 7.59-7.45 (m, 10H, C<sub>6</sub>H<sub>5</sub> + C<sub>6</sub>H<sub>4</sub>), 7.39-7.31 (m, 5H, C<sub>6</sub>H<sub>5</sub> + C<sub>6</sub>H<sub>4</sub>), 5.34 (d, <sup>3</sup>J<sub>HH</sub> = 13.1 Hz, 1H, H-C<sub>3</sub>), 5.29 (d, <sup>3</sup>J<sub>HH</sub> = 10Hz, 1H, H-C<sub>5</sub>), 4.32 (dd, <sup>3</sup>J<sub>HH</sub> = 13.1 Hz, <sup>3</sup>J<sub>HH</sub> = 10 Hz, 1H, H-C<sub>4</sub>), 3.73 (s, 3H, C<sub>2</sub>-COOCH<sub>3</sub>), 3.12 (s, 3H, C<sub>5</sub>-COOCH<sub>3</sub>). <sup>13</sup>C{<sup>1</sup>H}NMR (CDCl<sub>3</sub>, 75.5 MHz) δ 170.4, 169.0, 168.6, 167.7, 136.7, 134.9, 134.2, 133.8, 132.5, 131.1, 132.7, 130.9, 129.9, 129.4, 129.0, 128.5, 128.2, 127.3, 125.4, 124.5, 81.1, 69.2, 53.6, 52.9, 52.1, 51.6. <sup>19</sup>F NMR (CDCl<sub>3</sub>, 282.4 MHz) δ -62.67 (s), -62.73 (s). HRMS (ESI<sup>+</sup>) m/z calc for C<sub>36</sub>H<sub>28</sub>F<sub>6</sub>N<sub>2</sub>NaO<sub>6</sub> [M+Na]<sup>+</sup> 721.1749, found 721.1757.

*Synthesis of dimethyl-2-benzamido-1-benzoyl-3,4-bis(2-fluorophenyl)pyrrolidine-2,5-dicarboxylate 3o.* The synthesis of **3o** was carried out following the same synthetic method than that detailed for **3a**. Therefore, δ-cyclobutane **2o** (62 mg, 0.10 mmol) was reacted with NaOMe (5.7 mg, 0.10 mmol) in MeOH (110 °C) for

1h to give **3o** as a mixture of two different diastereoisomers (2/1 molar ratio) after crystallization from CH<sub>2</sub>Cl<sub>2</sub>/pentane. Obtained: 37.7 mg (61% yield). Only the major isomer could be fully characterized by NMR spectroscopy. <sup>1</sup>H NMR (CDCl<sub>3</sub>, 400.13 MHz): δ = 8.05 (s, 1H, NH), 7.87 (m, 2H, H<sub>o</sub>, NHCO-C<sub>6</sub>H<sub>5</sub>), 7.76 (m, 1H, H<sub>6</sub>, C<sub>4</sub>-C<sub>6</sub>H<sub>4</sub>F), 7.59 (m, 2H, H<sub>o</sub>, N<sub>1</sub>CO-C<sub>6</sub>H<sub>5</sub>), 7.52 (m, 1H, H<sub>p</sub>, NHCO-C<sub>6</sub>H<sub>5</sub>), 7.45 (m, 2H, H<sub>m</sub>, NHCO-C<sub>6</sub>H<sub>5</sub>), 7.38-7.29 (m, 5H, H<sub>p</sub>, H<sub>m</sub>, N<sub>1</sub>CO-C<sub>6</sub>H<sub>5</sub> + C<sub>6</sub>H<sub>4</sub>F), 7.17 (m, 2H, H<sub>5</sub>, H<sub>4</sub>, C<sub>6</sub>H<sub>4</sub>F), 7.05 (m, 1H, H<sub>5</sub>, C<sub>6</sub>H<sub>4</sub>F), 6.95 (m, 2H, H<sub>3</sub>, C<sub>6</sub>H<sub>4</sub>F), 5.79 (d, <sup>3</sup>J<sub>HH</sub> = 13.3 Hz, 1H, H-C<sub>3</sub>), 5.29 (d, <sup>3</sup>J<sub>HH</sub> = 10 Hz, 1H, H-C<sub>5</sub>), 4.70 (dd, <sup>3</sup>J<sub>HH</sub> = 13.3 Hz, <sup>3</sup>J<sub>HH</sub> = 10 Hz, 1H, H-C<sub>4</sub>), 3.73 (s, 3H, C<sub>2</sub>-COOCH<sub>3</sub>), 3.13 (s, 3H, C<sub>5</sub>-COOCH<sub>3</sub>). <sup>13</sup>C {<sup>1</sup>H} NMR (CDCl<sub>3</sub>, 100.6 MHz): δ = 170.2, 169.0, 168.9, 167.7, 162.2, 161.3, 135.2, 134.8, 132.0, 130.9, 130.0, 129.6, 128.8, 128.4, 128.4, 128.1, 128.0, 127.3, 125.2, 124.2, 122.9, 120.2, 116.0, 115.5, 80.7, 68.7, 53.4, 52.1, 45.4, 42.8. <sup>19</sup>F NMR (CDCl<sub>3</sub>, 376.5 MHz) δ -115.15 (m), -119.45 (m). HRMS (ESI<sup>+</sup>) m/z calc for C<sub>34</sub>H<sub>28</sub>F<sub>2</sub>N<sub>2</sub>NaO<sub>6</sub> [M+Na]<sup>+</sup> 621.1813, found 621.1820.

*Synthesis of dimethyl-2-benzamido-1-benzoyl-3,4-bis(3,4-dichlorophenyl)pyrrolidine-2,5-dicarboxylate 3r.*

The synthesis of **3r** was carried out following the same synthetic method than that detailed for **3a**. Therefore, δ-cyclobutane **2r** (115.3 mg, 0.18 mmol) was reacted with NaOMe (10.0 mg, 0.18 mmol) in MeOH (110 °C) for 1h to give **3r** as a single diastereoisomer after column chromatography (silica, CHCl<sub>3</sub> as eluent) and crystallization from CH<sub>2</sub>Cl<sub>2</sub>/pentane. Obtained: 62.5 mg (54% yield). <sup>1</sup>H NMR (CDCl<sub>3</sub>, 500.13 MHz) δ 8.11 (s, 1H, NH), 7.91 (m, 2H, H<sub>o</sub>, NHCO-C<sub>6</sub>H<sub>5</sub>), 7.63-7.54 (m, 3H, H<sub>p</sub>, NHCO-C<sub>6</sub>H<sub>5</sub> + H<sub>o</sub>, N<sub>1</sub>CO-C<sub>6</sub>H<sub>5</sub>), 7.54-7.47 (m, 3H, H<sub>m</sub>, NHCO-C<sub>6</sub>H<sub>5</sub> + H<sub>2</sub>, C<sub>3</sub>-C<sub>6</sub>H<sub>3</sub>Cl<sub>2</sub>), 7.45-7.34 (m, 5H, H<sub>p</sub>, H<sub>m</sub>, N<sub>1</sub>CO-C<sub>6</sub>H<sub>5</sub> + H<sub>5</sub>, C<sub>4</sub>-C<sub>6</sub>H<sub>3</sub>Cl<sub>2</sub> + H<sub>5</sub>, C<sub>3</sub>-C<sub>6</sub>H<sub>3</sub>Cl<sub>2</sub>), 7.33-7.29 (m, 2H, H<sub>2</sub>, H<sub>6</sub>, C<sub>4</sub>-C<sub>6</sub>H<sub>3</sub>Cl<sub>2</sub>), 7.05 (dd, 1H, H<sub>6</sub>, C<sub>3</sub>-C<sub>6</sub>H<sub>3</sub>Cl<sub>2</sub>), 5.23 (d, <sup>3</sup>J<sub>HH</sub> = 16.4 Hz, 1H, H-C<sub>5</sub>), 5.18 (d, <sup>3</sup>J<sub>HH</sub> = 10.2 Hz, 1H, H-C<sub>3</sub>), 4.13 (dd, <sup>3</sup>J<sub>HH</sub> = 16.4 Hz, <sup>3</sup>J<sub>HH</sub> = 10.2 Hz, 1H, H-C<sub>4</sub>), 3.81 (s, 3H, C<sub>2</sub>-C(O)OCH<sub>3</sub>), 3.16 (s, 3H, C<sub>5</sub>-C(O)OCH<sub>3</sub>). <sup>13</sup>C{<sup>1</sup>H}NMR (CDCl<sub>3</sub>, 125.7 MHz) δ 170.1, 168.8, 168.3, 167.6, 135.8, 134.7, 134.0, 133.3, 133.0, 132.9, 132.7, 132.6, 132.4, 131.1, 131.0, 130.7, 130.1, 129.9, 128.9, 128.3, 128.0, 127.9, 127.2, 127.1, 80.9, 68.9, 53.5, 52.5, 52.1, 51.0. HRMS (ESI<sup>+</sup>) m/z calc for C<sub>34</sub>H<sub>26</sub>Cl<sub>4</sub>N<sub>2</sub>NaO<sub>6</sub> [M+Na]<sup>+</sup> 721.0437, found 721.0418.

## 2.- References for the Supporting Information

- (1) (a) J. Plöchl, Ueber Phenylglycidasäure (Phenyloxacrylsäure) *Chem. Ber.* 1883, **16**, 2815; (b) J. Plöchl, Ueber einige Derivate der Benzoylimidozimmtsäure. *Chem. Ber.* 1884, **17**, 1623; (c) E. Erlenmeyer, Ueber die Condensation der Hippursäure mit Phtalsäureanhydrid und mit Benzaldehyd. *Justus Liebigs Annalen der Chemie* 1893, **275**, 1; (d) H. E. Carter, *Azlactones*, Chapter 5 of the book series *Organic Reactions* 1946, **3**, 198; (e) R. Filler, *Advances in Heterocyclic Chemistry*, A. R. Katrizky, Editor, Academic Press, New York, 1954, ch. 4, p. 75; (f) Y. S. Rao and R. Filler, R. Geometric Isomers of 2-Aryl(Aralkyl)-4-arylidene(alkylidene)-5(4H)-oxazolones. *Synthesis* 1975, **12**, 749; (g) C. Cativiela, M. D. Díaz de Villegas and E. Meléndez, On the synthesis of geometric isomers of 2-methyl (or phenyl)-4-[ $\alpha$ -arylethylidene]-5(4H)-oxazolones. *J. Heterocycl. Chem.* 1985, **22**, 1655; (h) F. M. Bautista, J. M. Campelo, A. García, D. Luna, J. M. Marinas and A. Romero, Study on dry-media microwave azlactone synthesis on different supported KF catalysts: influence of textural and acid–base properties of supports. *J. Chem. Soc., Perkin Trans 2*, 2002, 227.
- (2) (a) F. H. Burstall, Optical activity dependent on co-ordinated bivalent ruthenium. *J. Chem. Soc.* 1936, 173. (b) J. A. Broomhead, C. G. Young and P. Hood, Tris(2,2'-Bipyridine)Ruthenium(II) Dichloride Hexahydrate *Inorg. Synth.* 1982, **21**, 127.
- (3) CrysAlis RED, version 1.171.27p8; Oxford Diffraction Ltd., Oxford, U.K., 2005.
- (4) SAINT; Version 5.0 ed.; Bruker Analytical X-Ray Systems: Madison, WI, 1998.
- (5) G. M. Sheldrick, SADABS, Program for absorption and other corrections, Göttingen University, 1996.
- (6) G. M. Sheldrick, SHELXS-86, Phase annealing in SHELX-90: direct methods for larger structures. *Acta Cryst.* **1990**, *A46*, 467.
- (7) G. M. Sheldrick, SHELXL-97, A short history of SHELX. *Acta Cryst.* 2008, **A64**, 112.
- (8) G. M. Sheldrick, Crystal structure refinement with SHELXL. *Acta Cryst. Sect. C: Struct. Chem.* 2015, **C71**, 3.

(9) Gaussian 16, Revision C.01, M. J. Frisch, G. W. Trucks, H. B. Schlegel, G. E. Scuseria, M. A. Robb, J. R. Cheeseman, G. Scalmani, V. Barone, G. A. Petersson, H. Nakatsuji, X. Li, M. Caricato, A. V. Marenich, J. Bloino, B. G. Janesko, R. Gomperts, B. Mennucci, H. P. Hratchian, J. V. Ortiz, A. F. Izmaylov, J. L. Sonnenberg, D. Williams-Young, F. Ding, F. Lipparini, F. Egidi, J. Goings, B. Peng, A. Petrone, T. Henderson, D. Ranasinghe, V. G. Zakrzewski, J. Gao, N. Rega, G. Zheng, W. Liang, M. Hada, M. Ehara, K. Toyota, R. Fukuda, J. Hasegawa, M. Ishida, T. Nakajima, Y. Honda, O. Kitao, H. Nakai, T. Vreven, K. Throssell, J. A. Jr. Montgomery, J. E. Peralta, F. Ogliaro, M. J. Bearpark, J. J. Heyd, E. N. Brothers, K. N. Kudin, V. N. Staroverov, T. A. Keith, R. Kobayashi, J. Normand, K. Raghavachari, A. P. Rendell, J. C. Burant, S. S. Iyengar, J. Tomasi, M. Cossi, J. M. Millam, M. Klene, C. Adamo, R. Cammi, J. W. Ochterski, R. L. Martin, K. Morokuma, O. Farkas, J. B. Foresman and D. J. Fox, Gaussian, Inc., Wallingford CT, **2016**.

(10) Y. Zhao and D. G. Truhlar, The M06 suite of density functionals for main group thermochemistry, thermochemical kinetics, noncovalent interactions, excited states, and transition elements: two new functionals and systematic testing of four M06-class functionals and 12 other functionals. *Theor. Chem. Acc.*, **2008**, *120*, 215.

(11) (a) E. Cancès, B. Mennucci and J. Tomasi, A new integral equation formalism for the polarizable continuum model: Theoretical background and applications to isotropic and anisotropic dielectrics. *J. Chem. Phys.*, **1997**, *107*, 3032; (b) M. Cossi, V. Barone, B. Mennucci and J. Tomasi, Ab initio study of ionic solutions by a polarizable continuum dielectric model. *Chem. Phys. Lett.*, **1998**, *286*, 253; (c) J. Tomasi, B. Mennucci and E. Cancès, The IEF version of the PCM solvation method: an overview of a new method addressed to study molecular solutes at the QM ab initio level. *Mol. Struct.: THEOCHEM*, **1999**, *464*, 211.

### 3.- $^1\text{H}$ NMR control spectra of starting (Z)-4-arylidene-2-phenyl-5(4H)-oxazolones 1a-1u

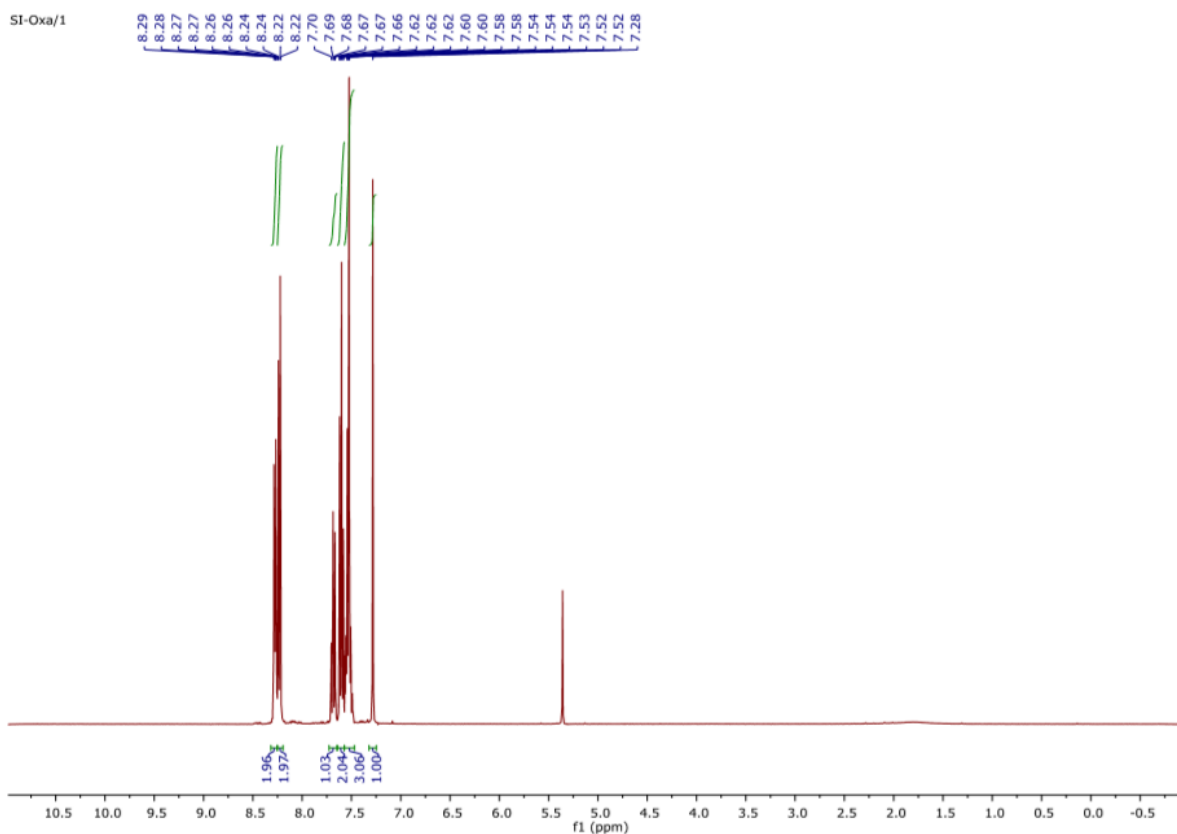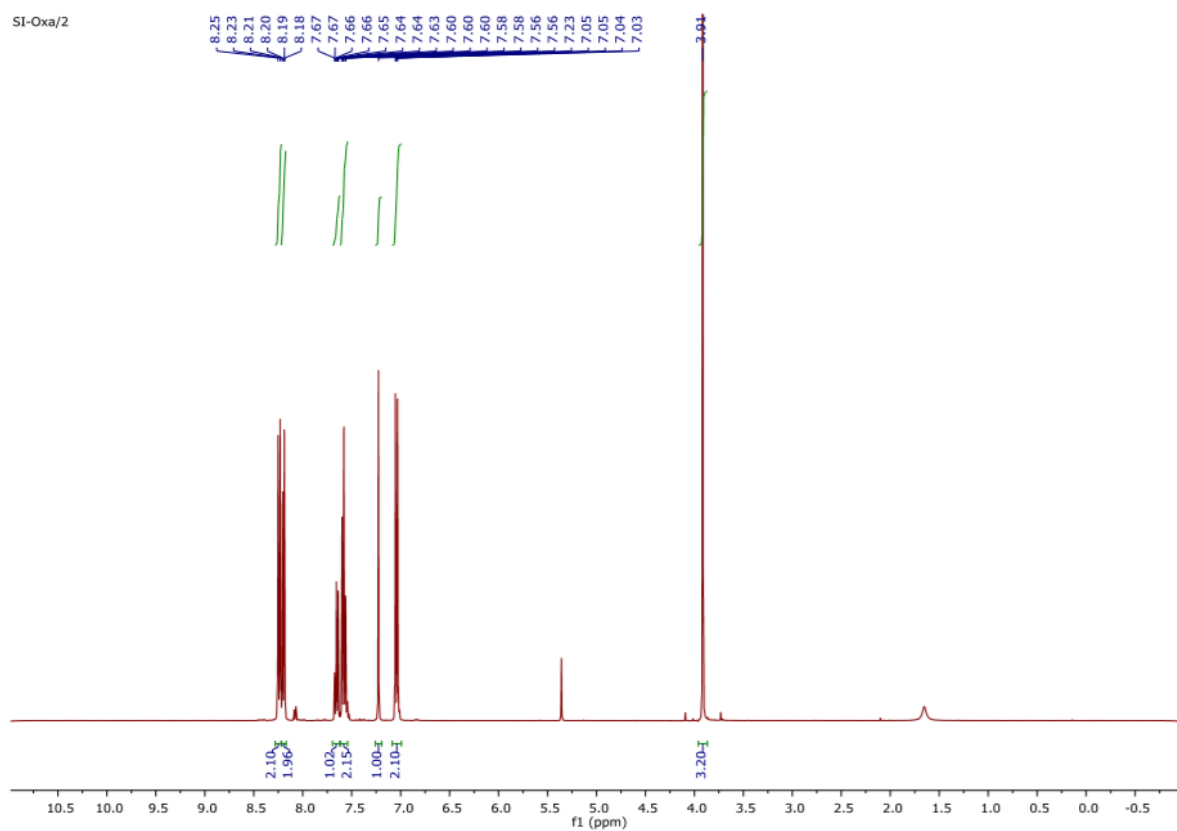

SI-Oxa/6

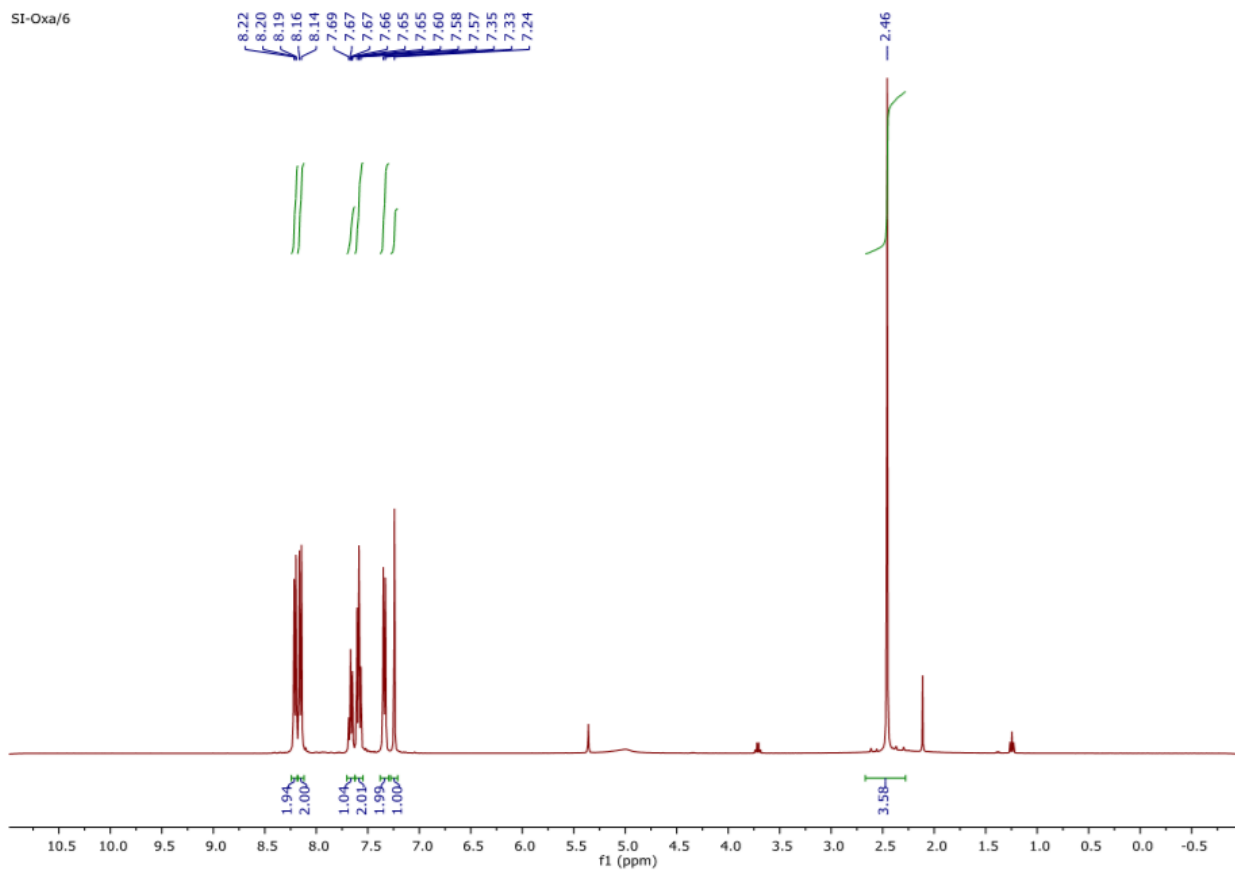

$^1\text{H}$  NMR ( $\text{CD}_2\text{Cl}_2$ , 300.13 MHz) spectrum of oxazolone **1c**

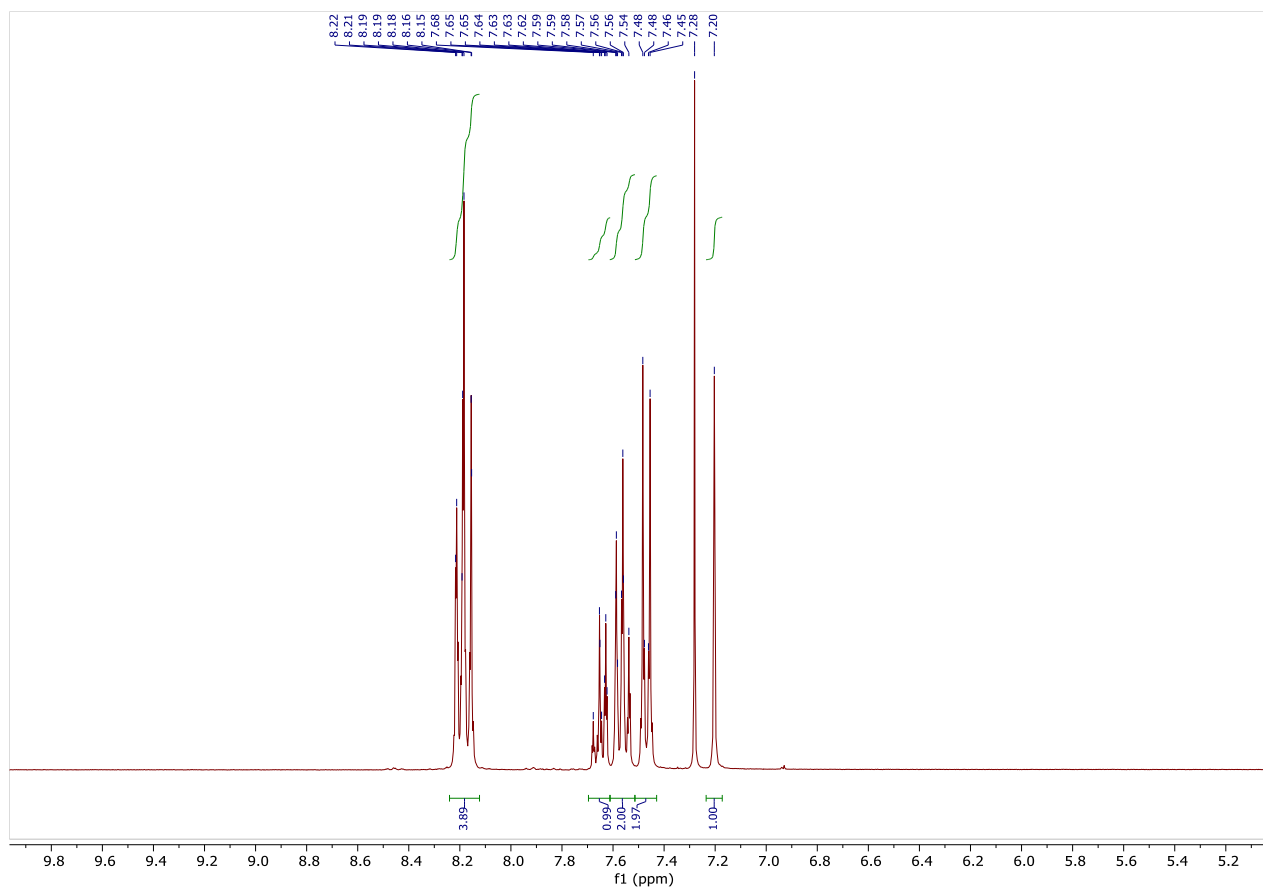

$^1\text{H}$  NMR ( $\text{CDCl}_3$ , 300.13 MHz) spectrum of oxazolone **1d**



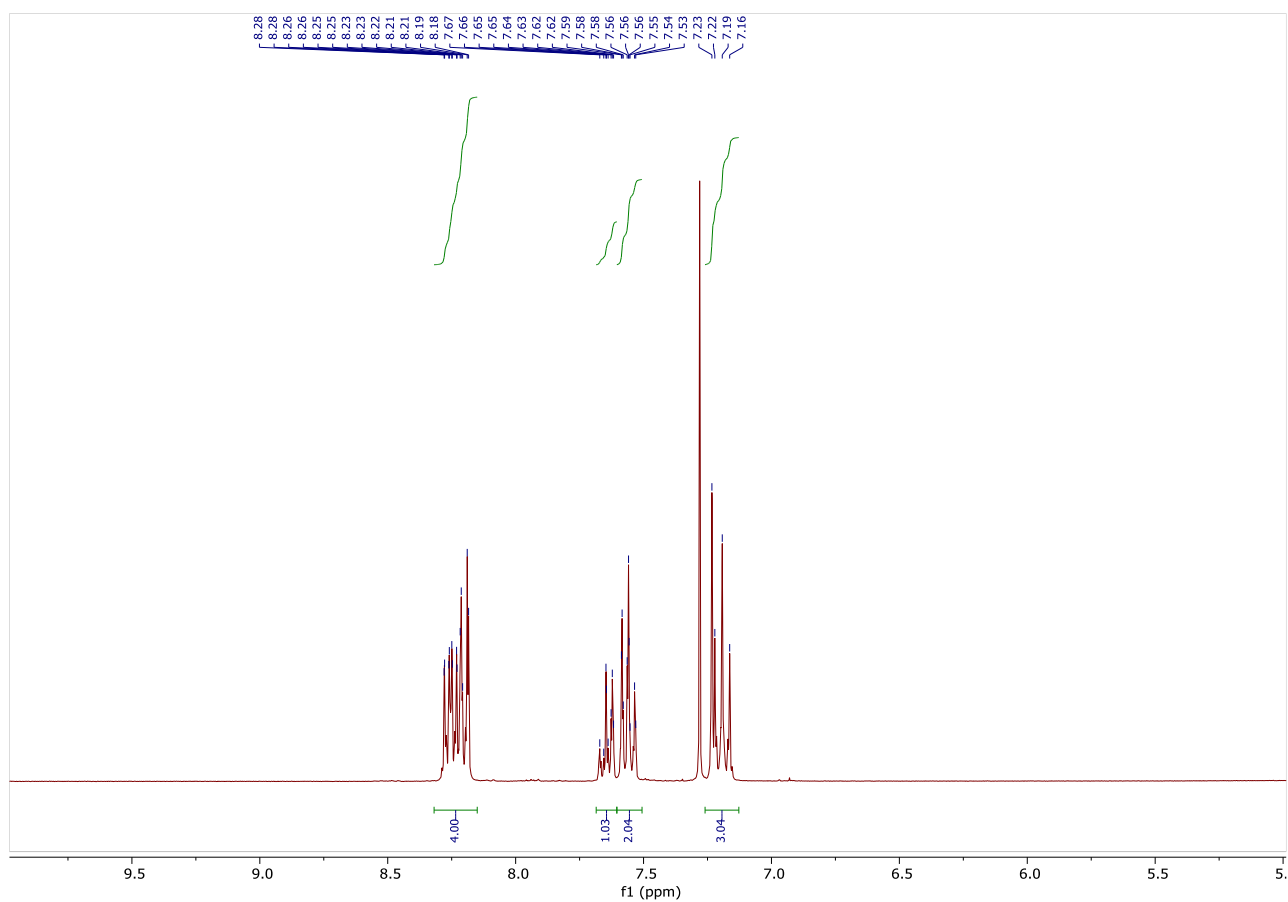

$^1\text{H}$  NMR ( $\text{CDCl}_3$ , 300.13 MHz) spectrum of oxazolone **1e**

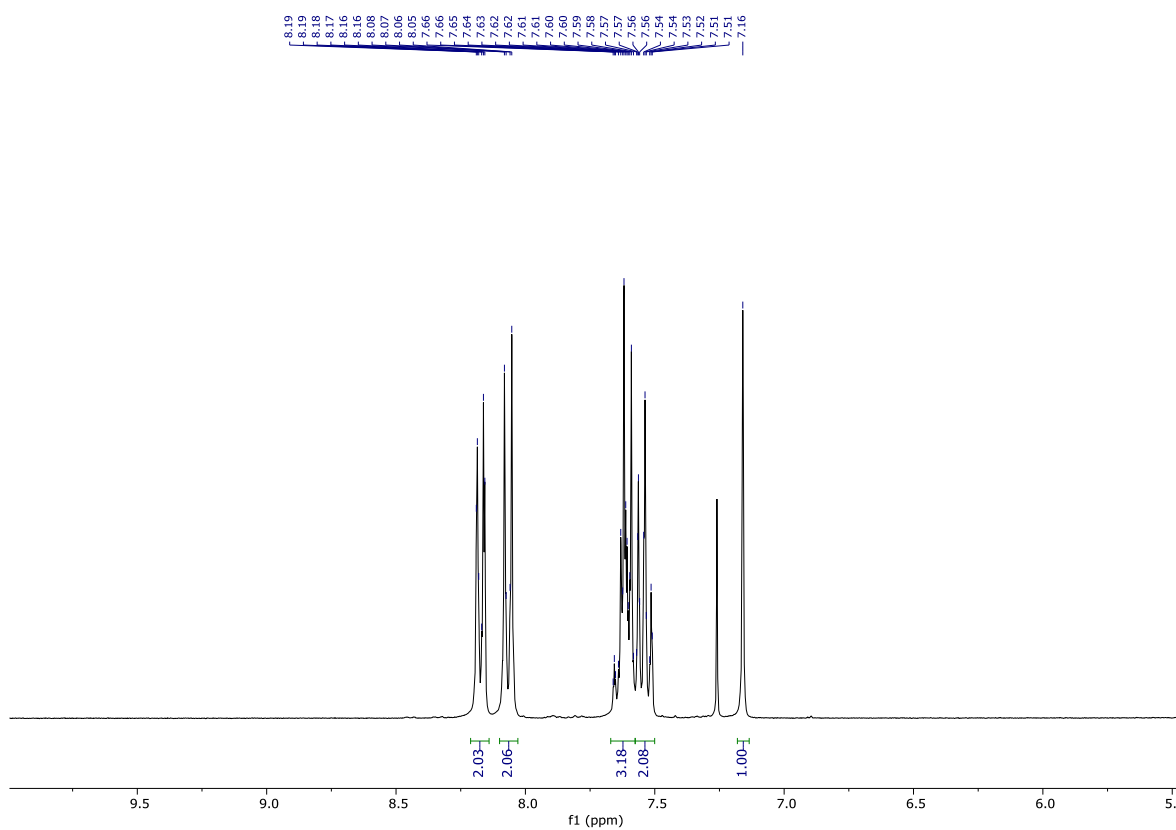

$^1\text{H}$  NMR ( $\text{CDCl}_3$ , 300.13 MHz) spectrum of oxazolone **1f**

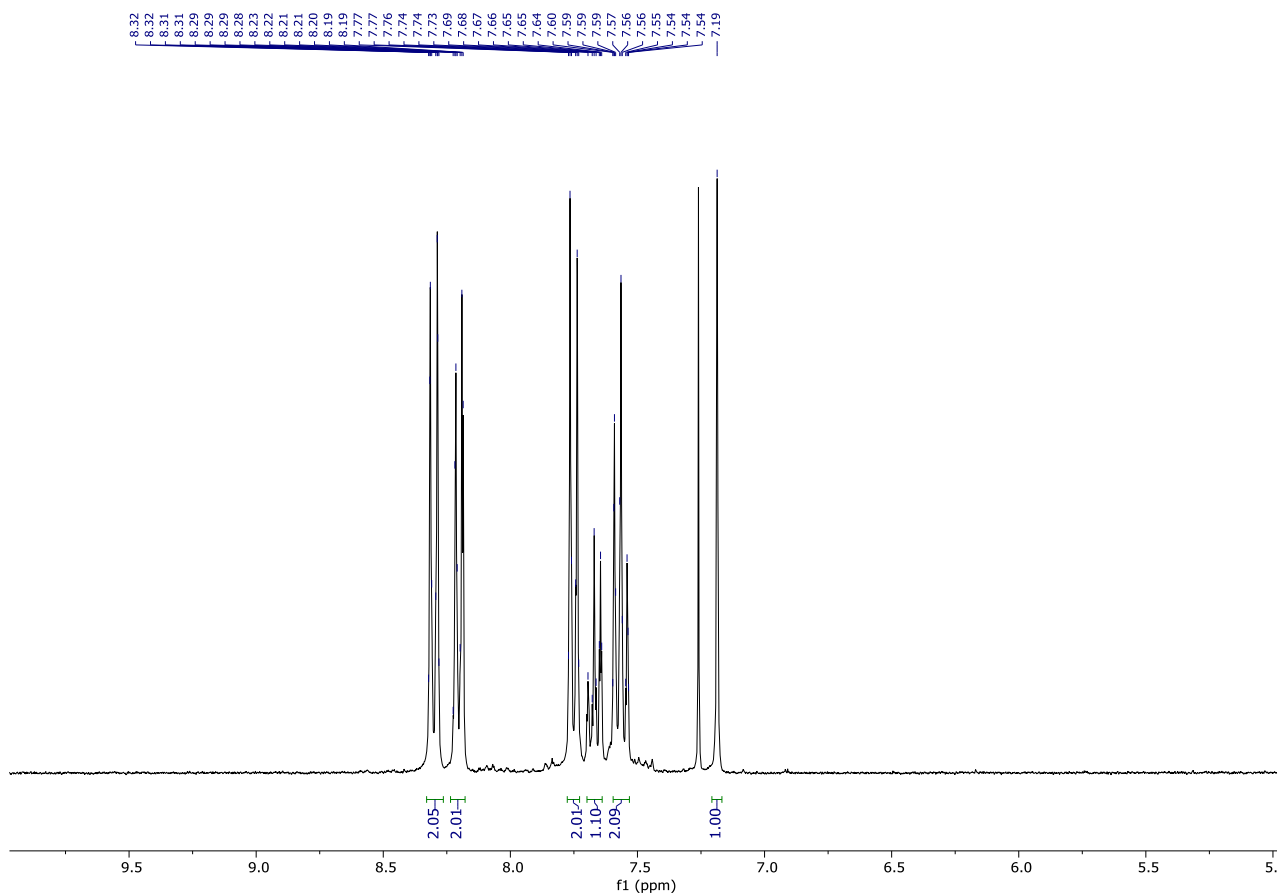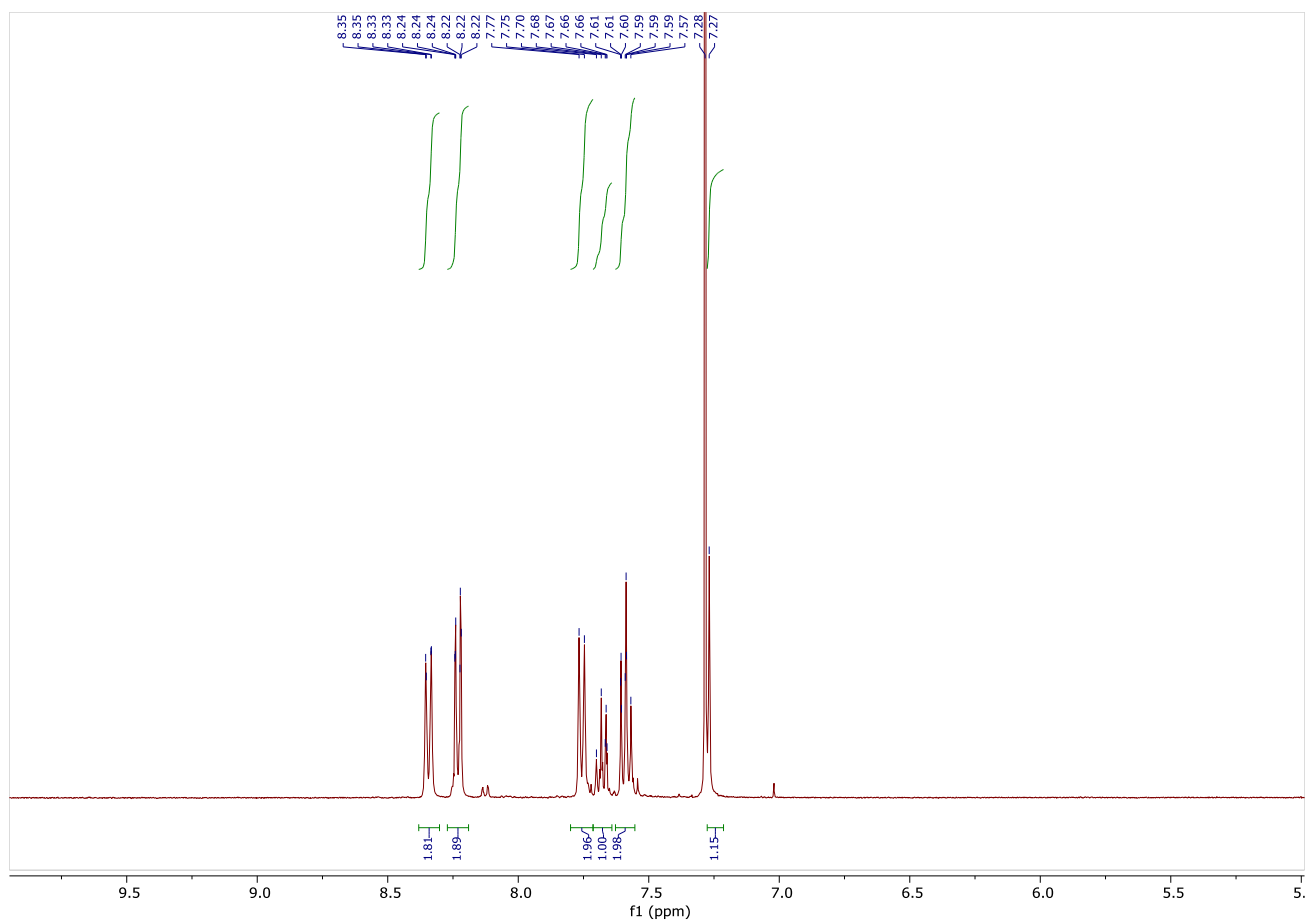

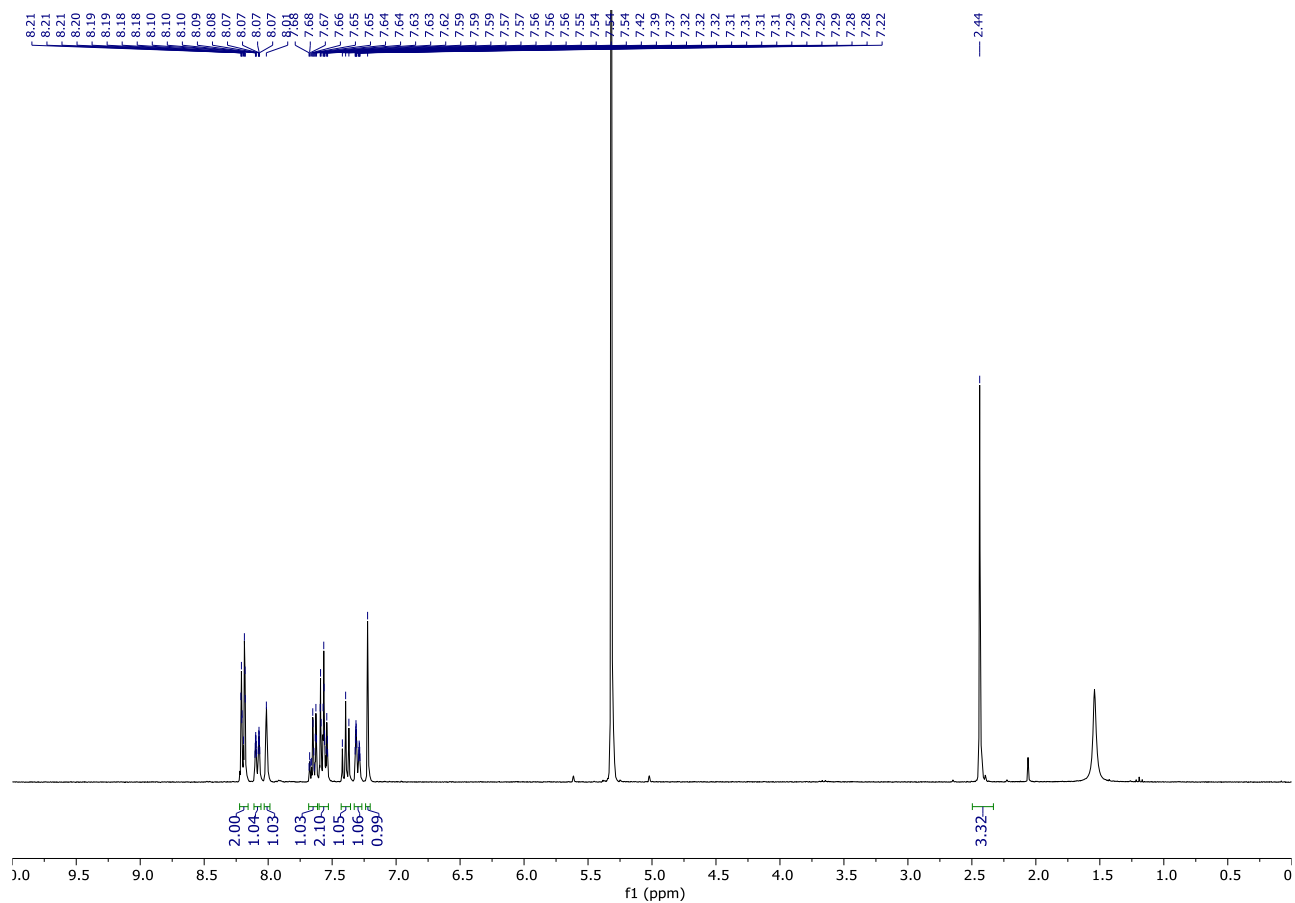

$^1\text{H}$  NMR ( $\text{CDCl}_3$ , 300.13 MHz) spectrum of oxazolone **1i**

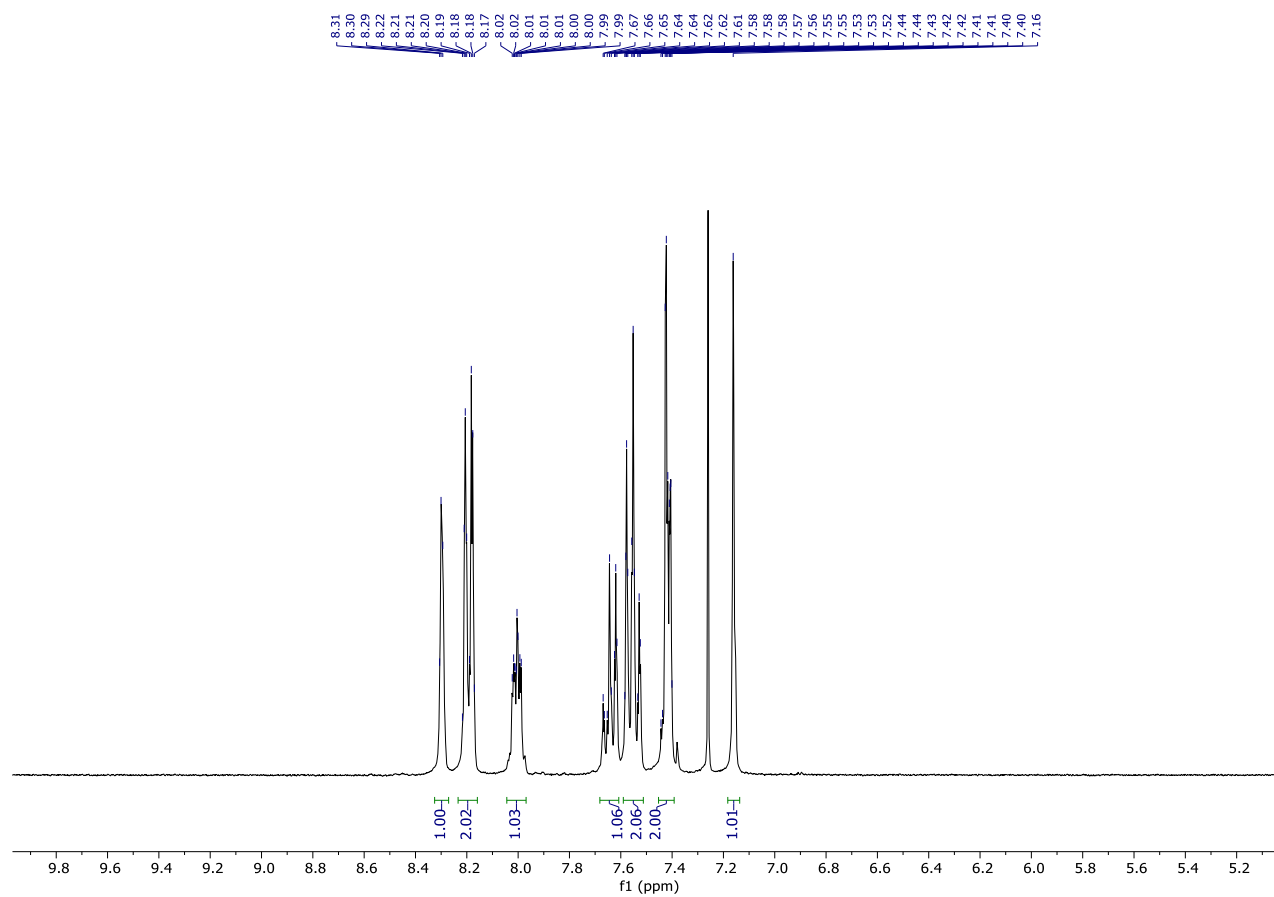

$^1\text{H}$  NMR ( $\text{CDCl}_3$ , 300.13 MHz) spectrum of oxazolone **1j**

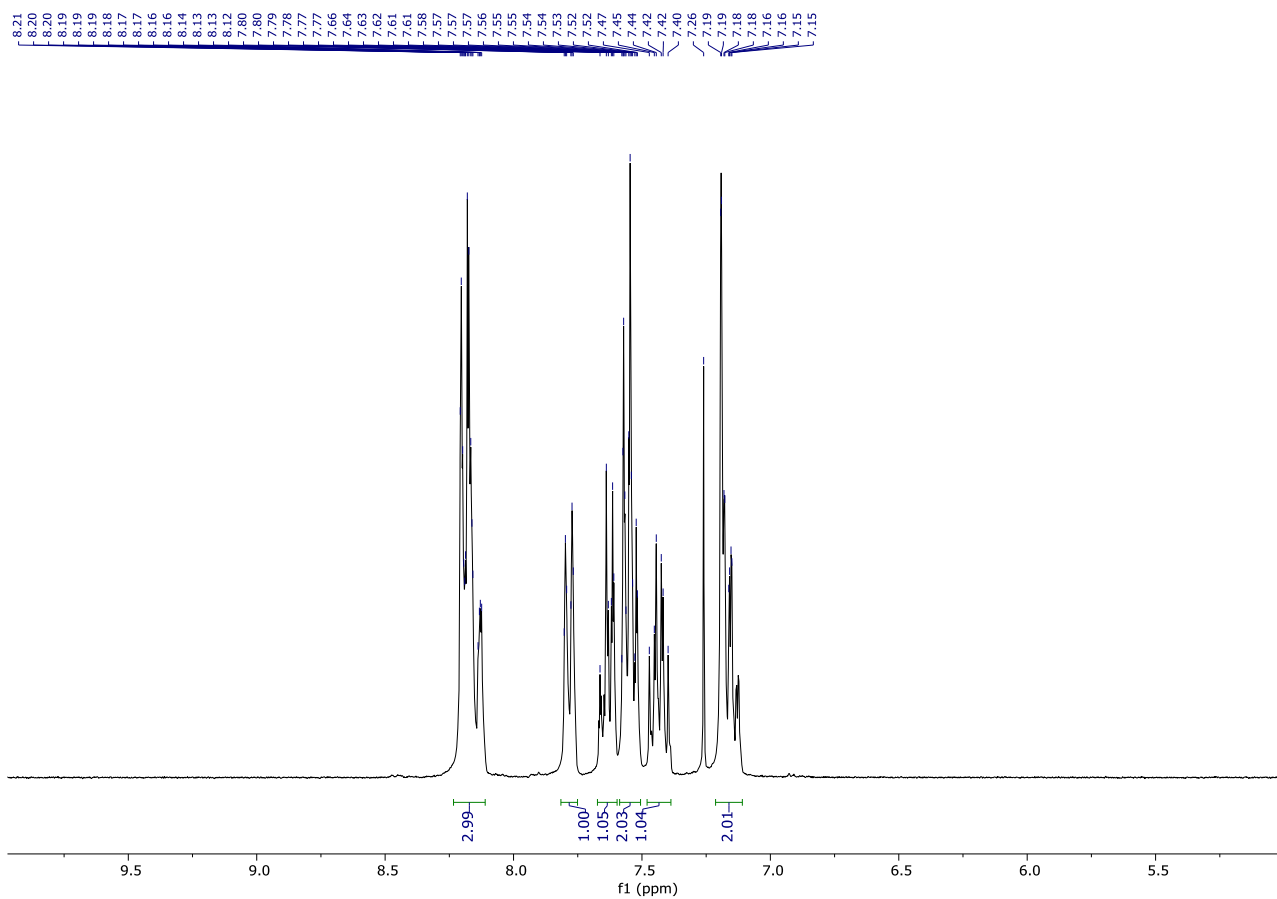

$^1\text{H}$  NMR ( $\text{CDCl}_3$ , 300.13 MHz) spectrum of oxazolone **1k**

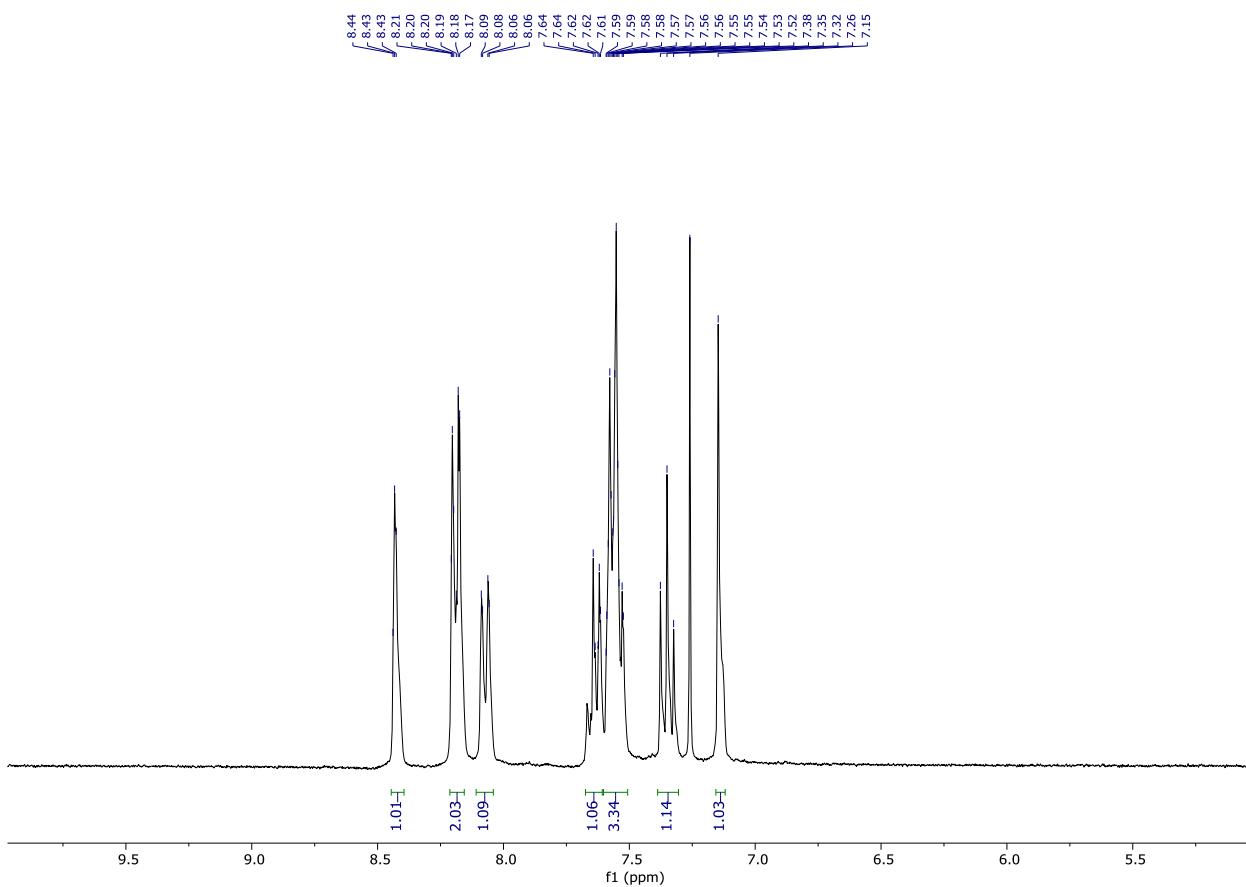

$^1\text{H}$  NMR ( $\text{CDCl}_3$ , 300.13 MHz) spectrum of oxazolone **1l**

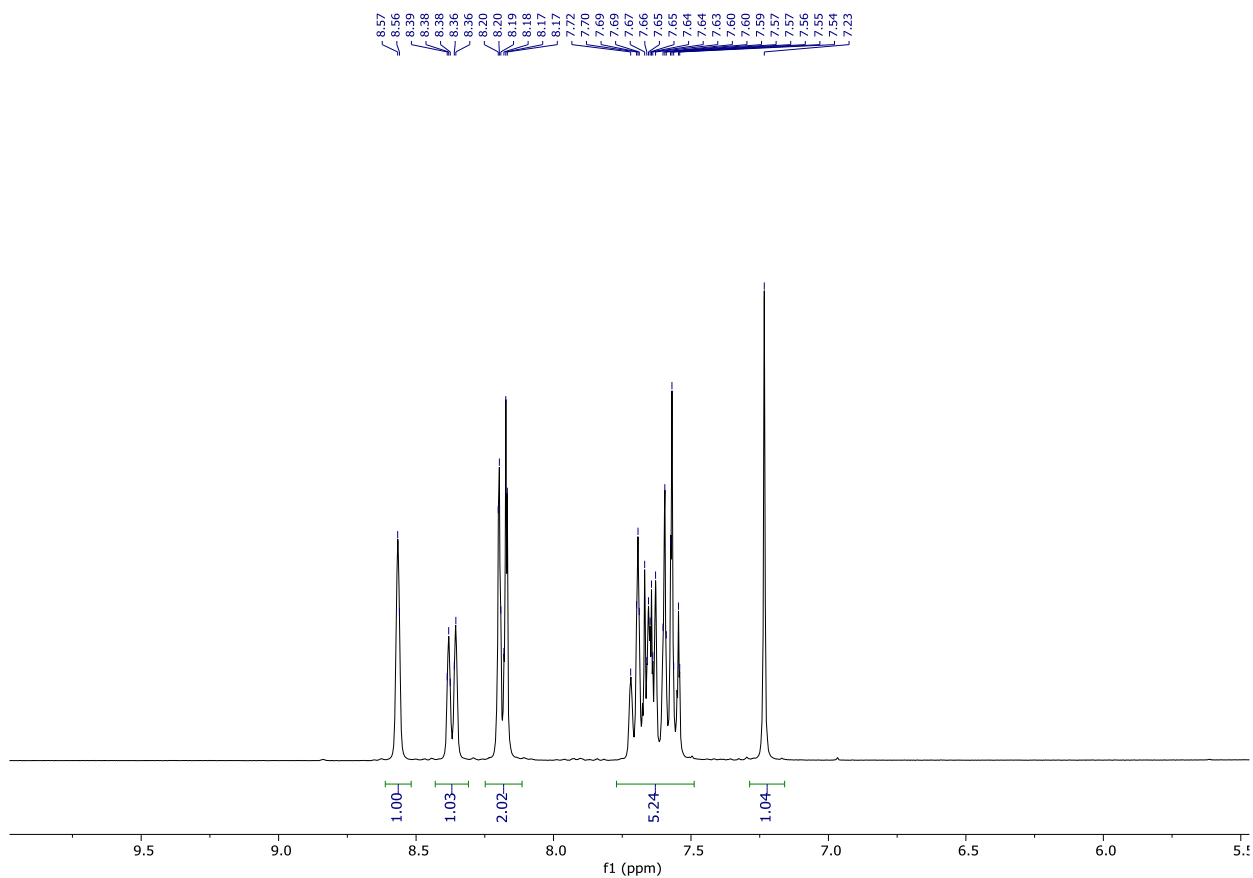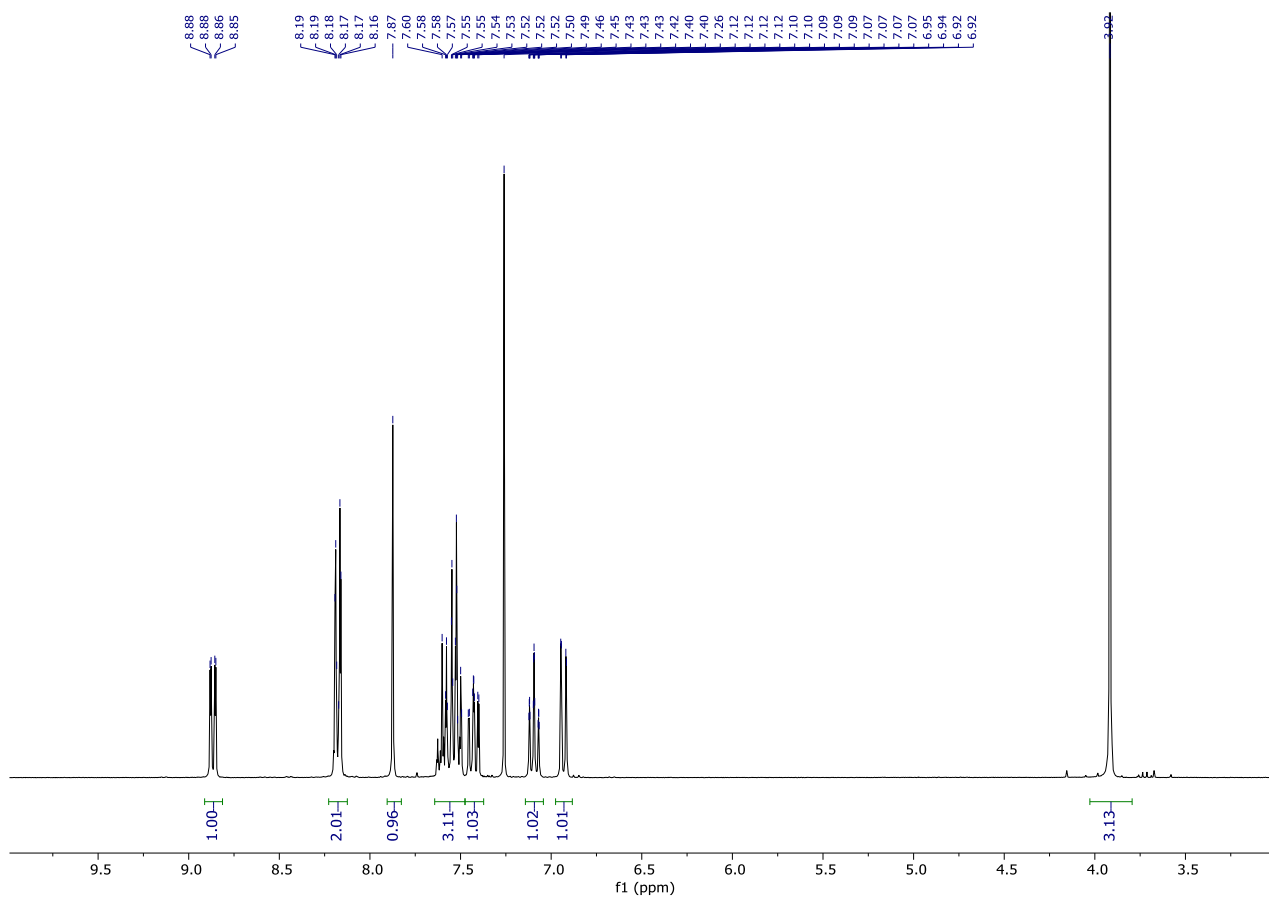

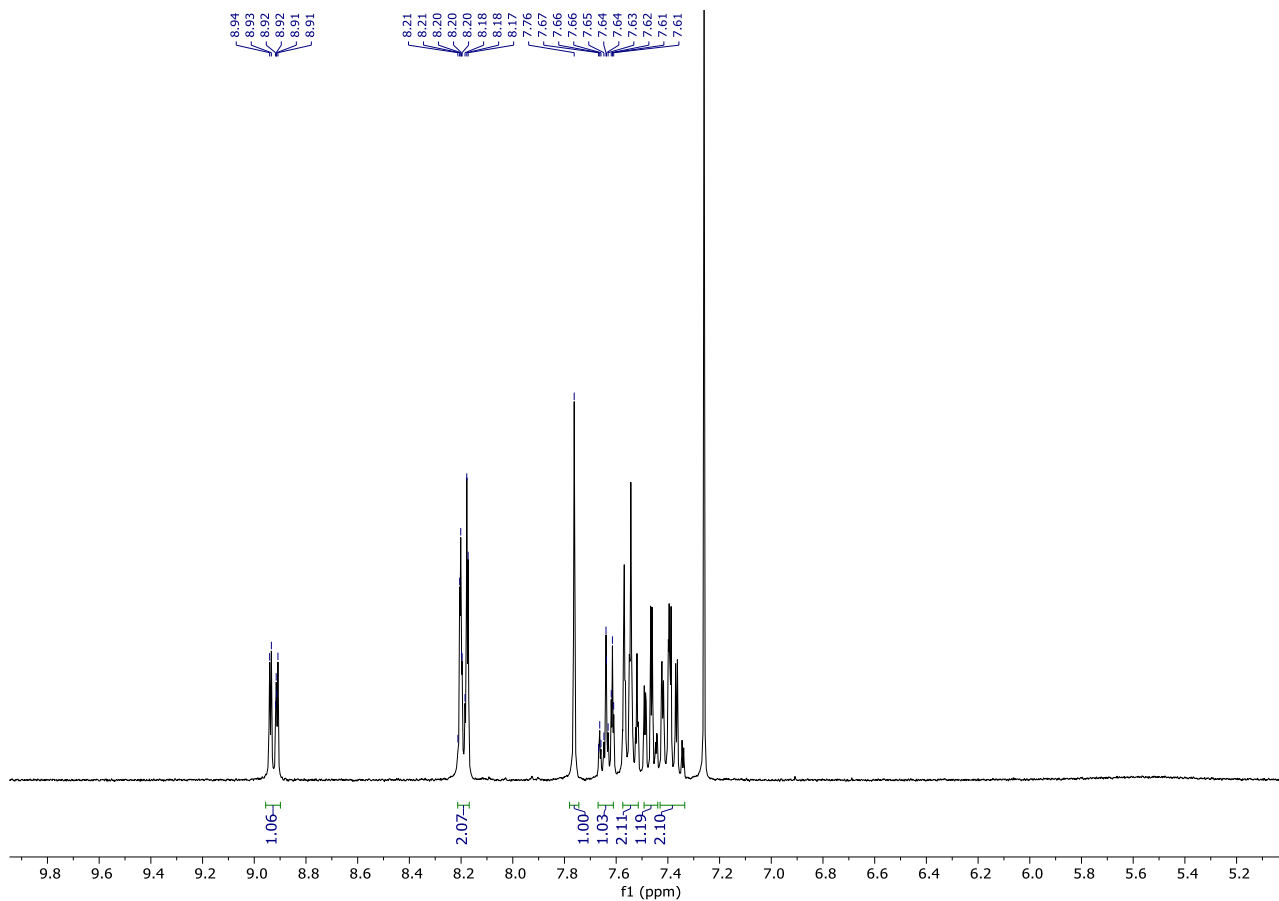

$^1\text{H}$  NMR ( $\text{CDCl}_3$ , 300.13 MHz) spectrum of oxazolone **1o**

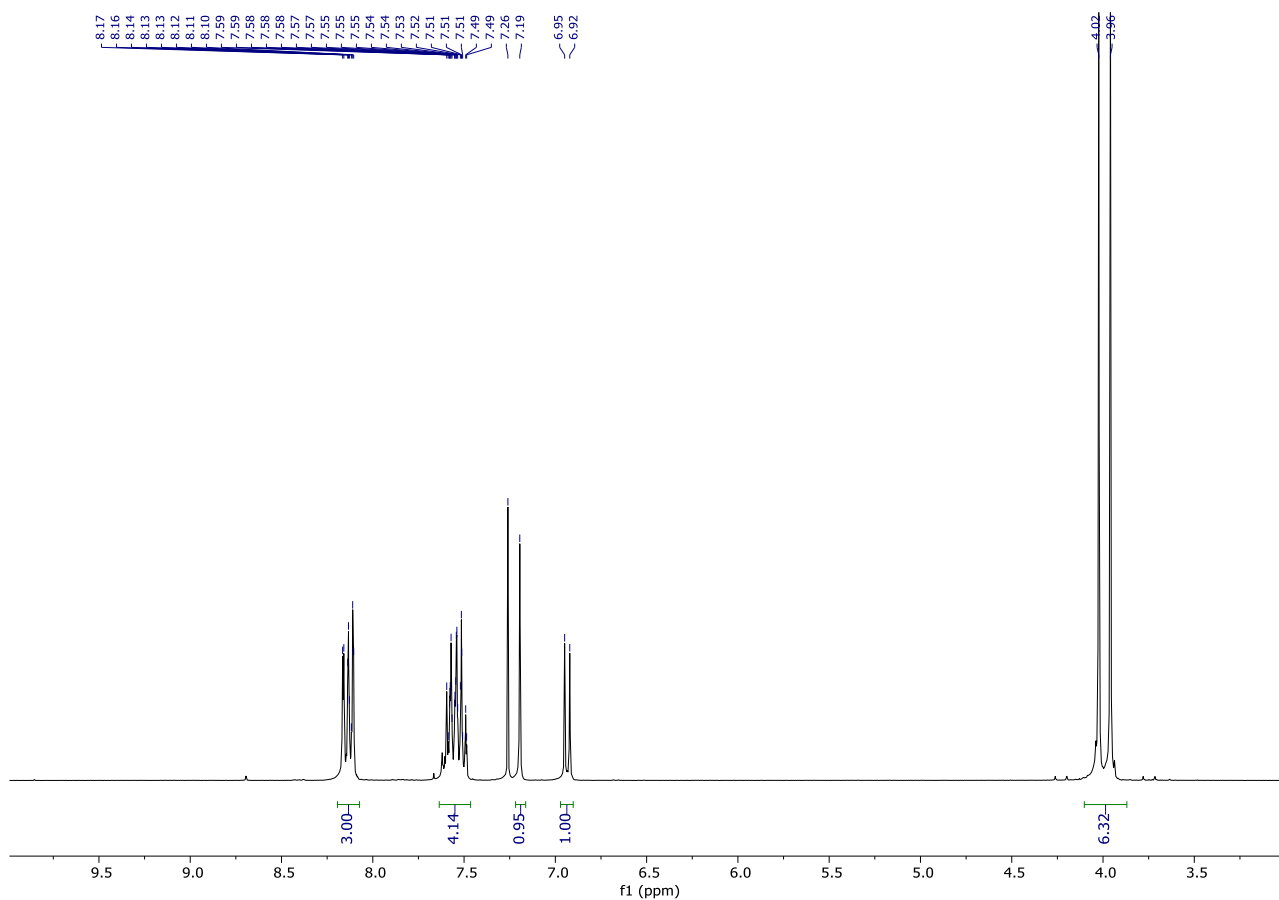

$^1\text{H}$  NMR ( $\text{CDCl}_3$ , 300.13 MHz) spectrum of oxazolone **1p**

SI-Oxa/8

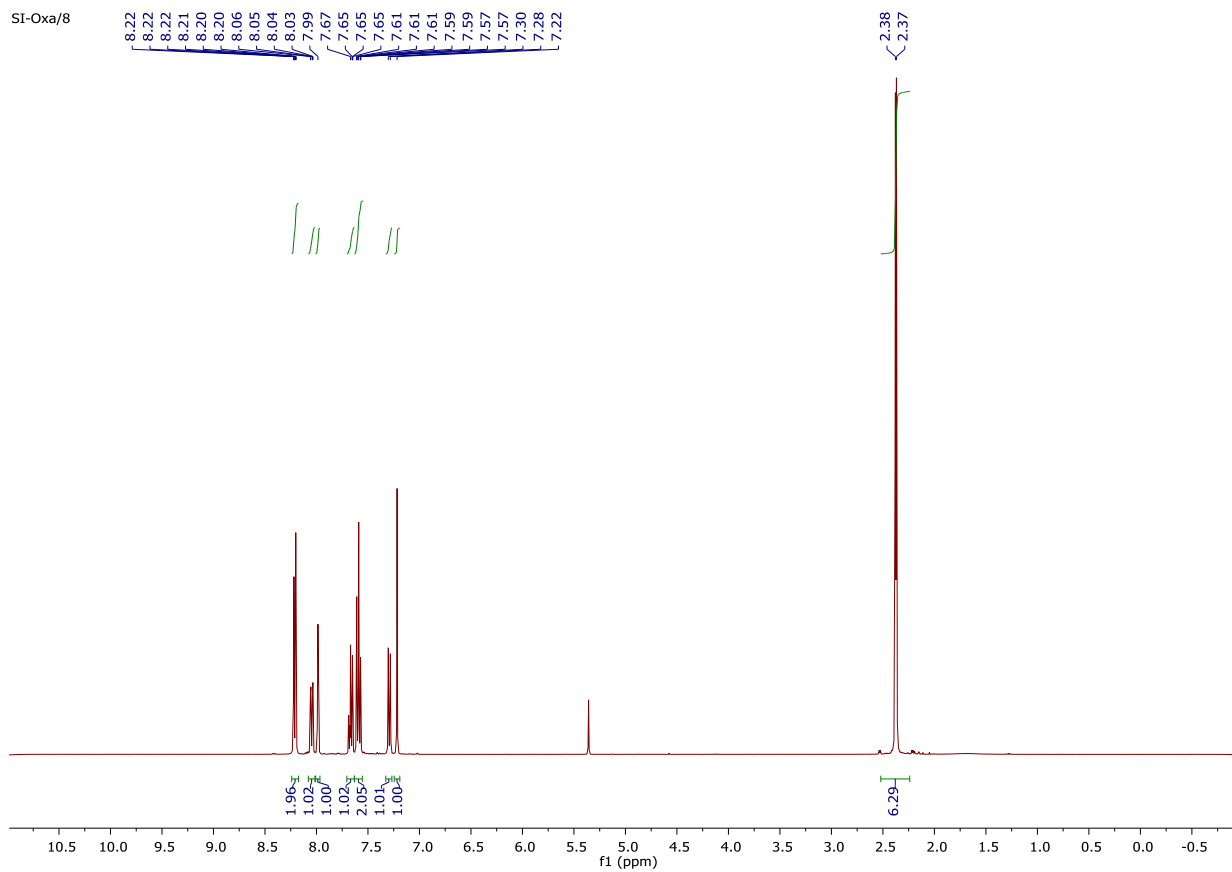

$^1\text{H}$  NMR ( $\text{CD}_2\text{Cl}_2$ , 300.13 MHz) spectrum of oxazolone **1q**

Oxazolonas 2-fenil/3,4-Cl2

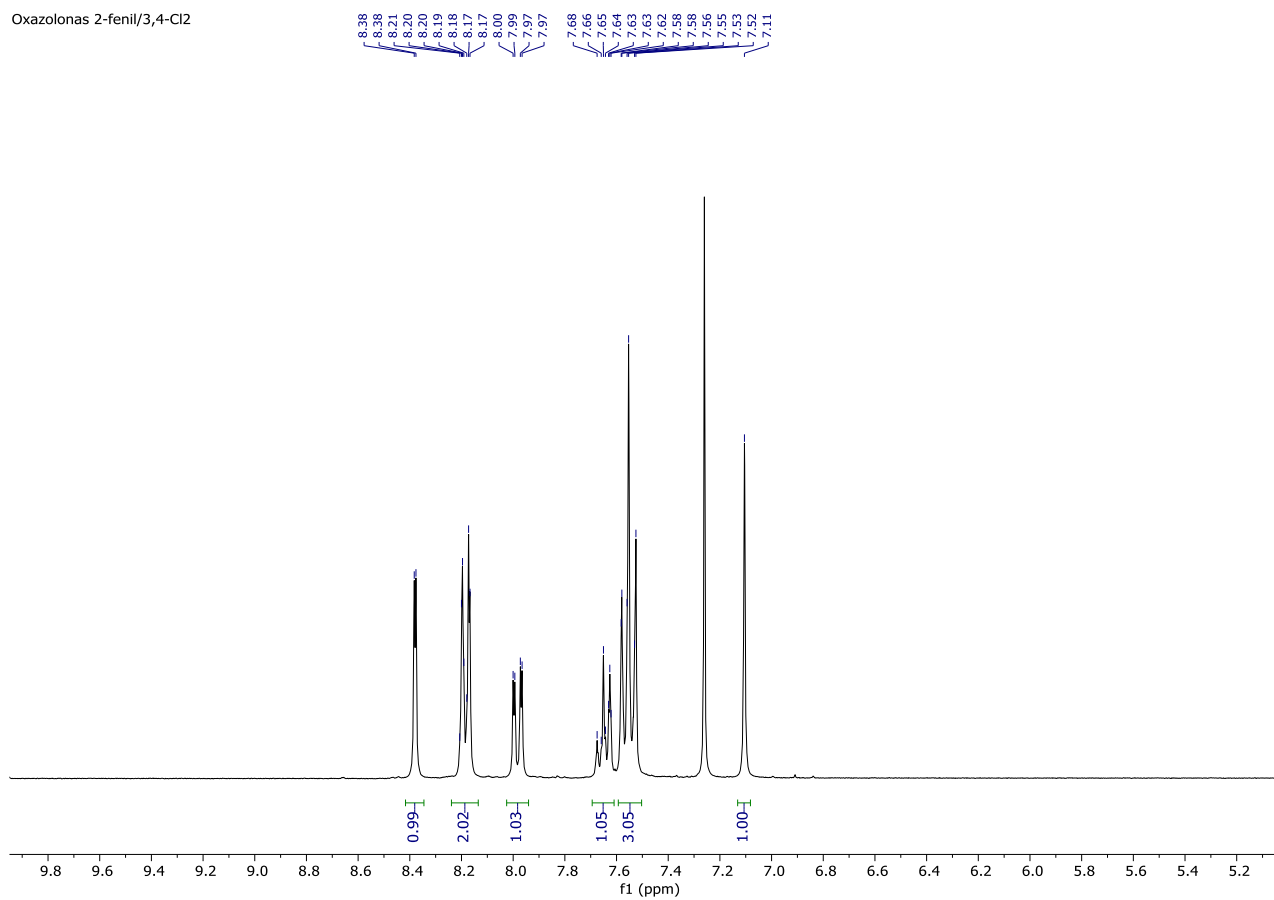

$^1\text{H}$  NMR ( $\text{CDCl}_3$ , 300.13 MHz) spectrum of oxazolone **1r**

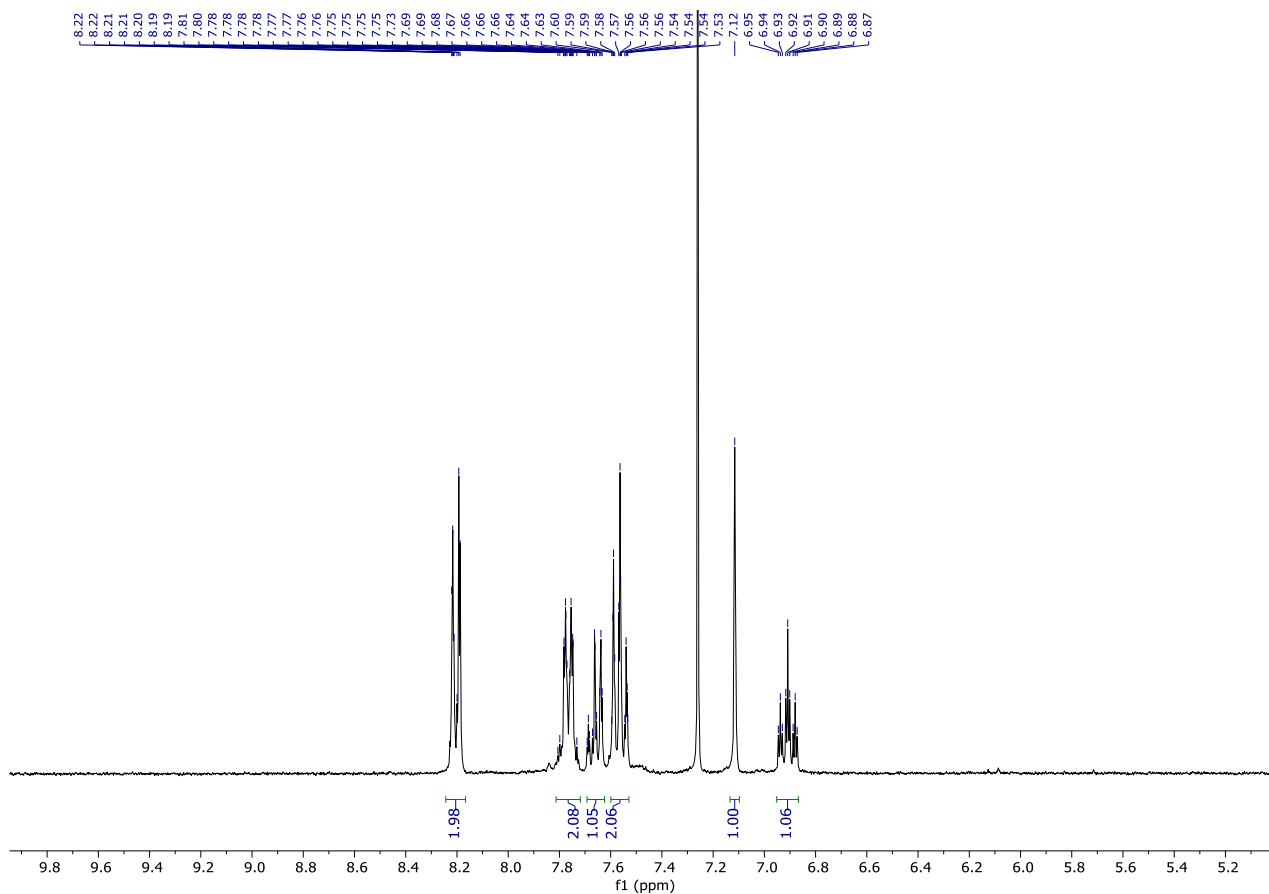

$^1\text{H}$  NMR ( $\text{CDCl}_3$ , 300.13 MHz) spectrum of oxazolone **1s**

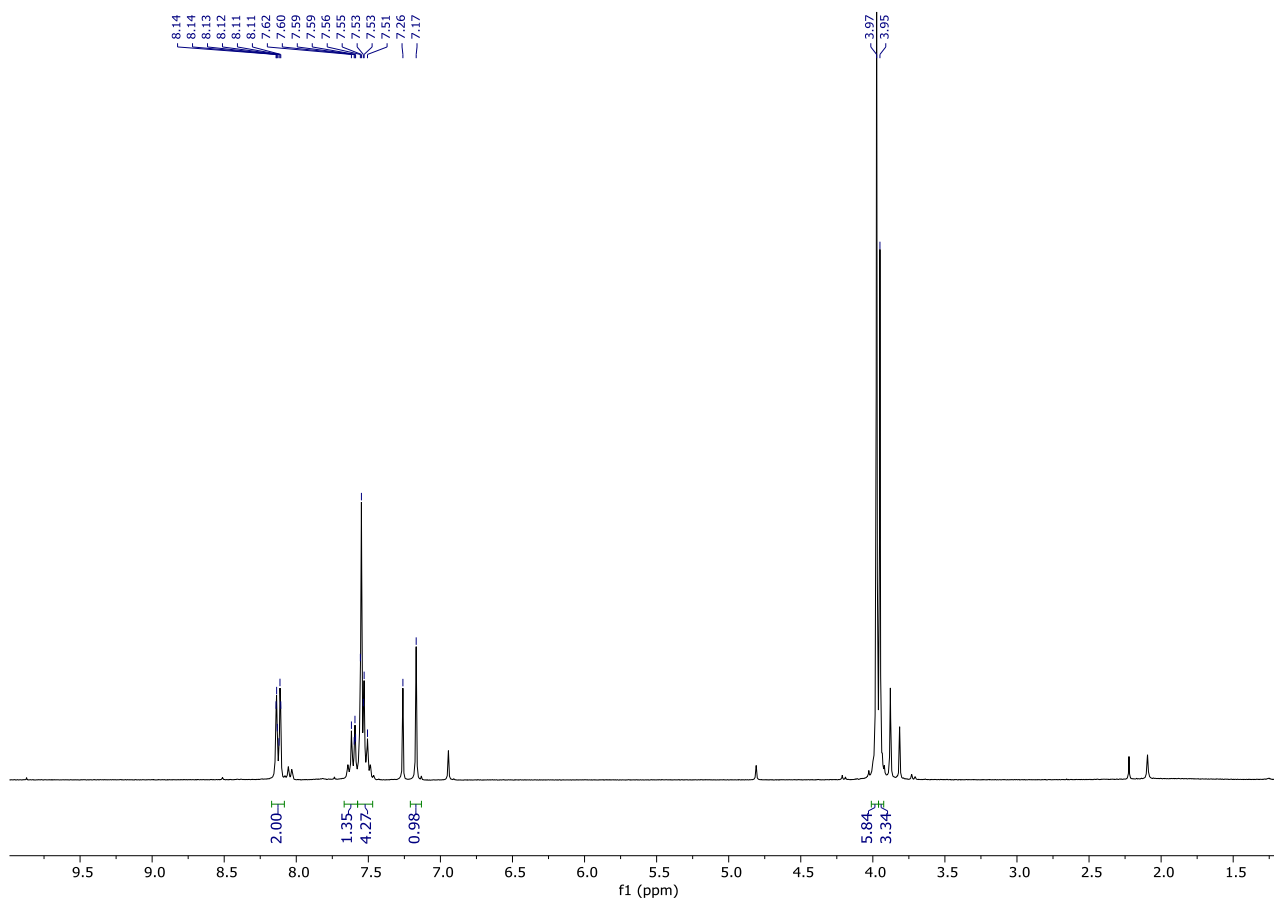

$^1\text{H}$  NMR ( $\text{CDCl}_3$ , 300.13 MHz) spectrum of oxazolone **1t**



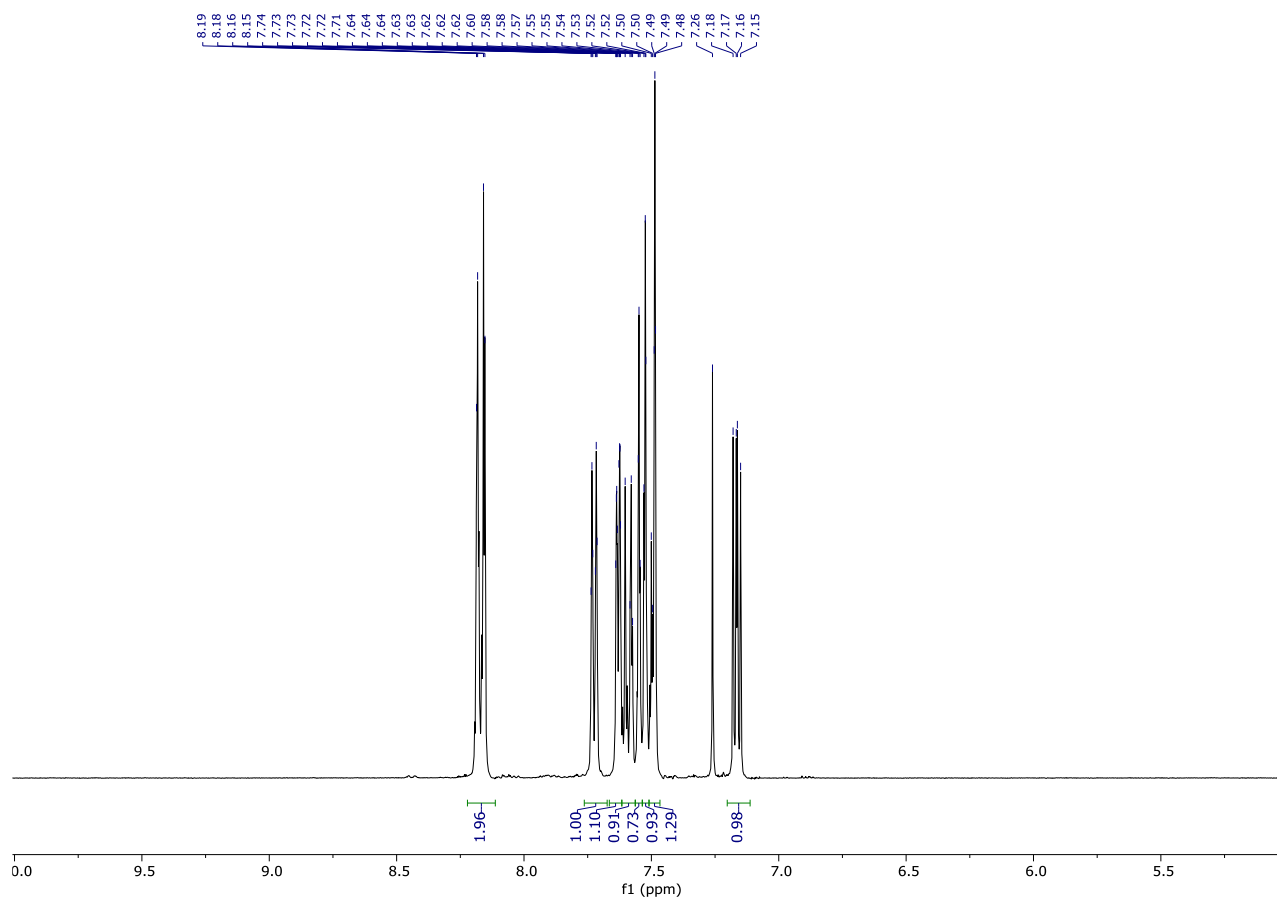

$^1\text{H}$  NMR ( $\text{CDCl}_3$ , 300.13 MHz) spectrum of oxazolone **1u**

#### 4.- Copies of NMR spectra of delta-1,2-diaminotruxinic derivatives 2a-2u

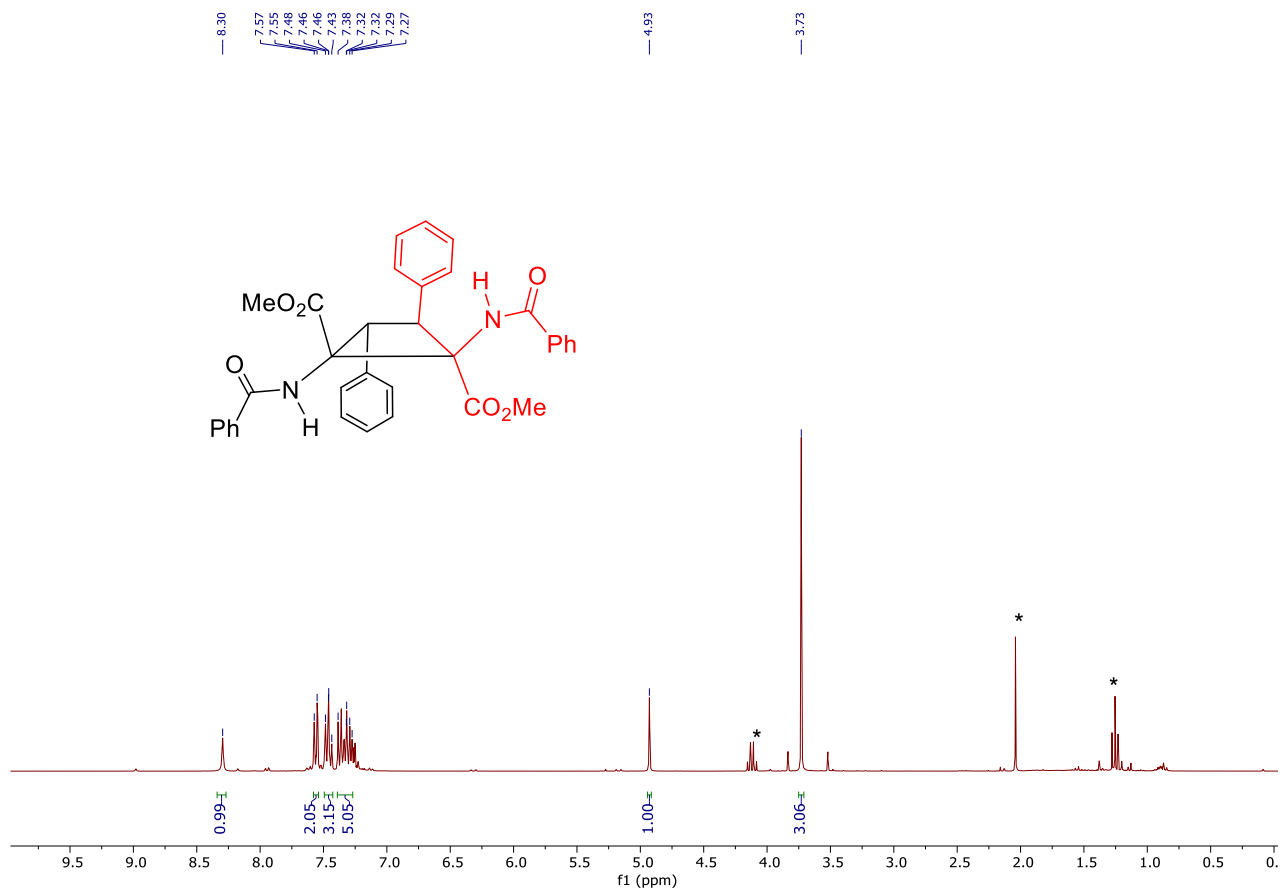

<sup>1</sup>H NMR spectrum (CDCl<sub>3</sub>, 300.13 MHz) of **2a** (\* = ethyl acetate).

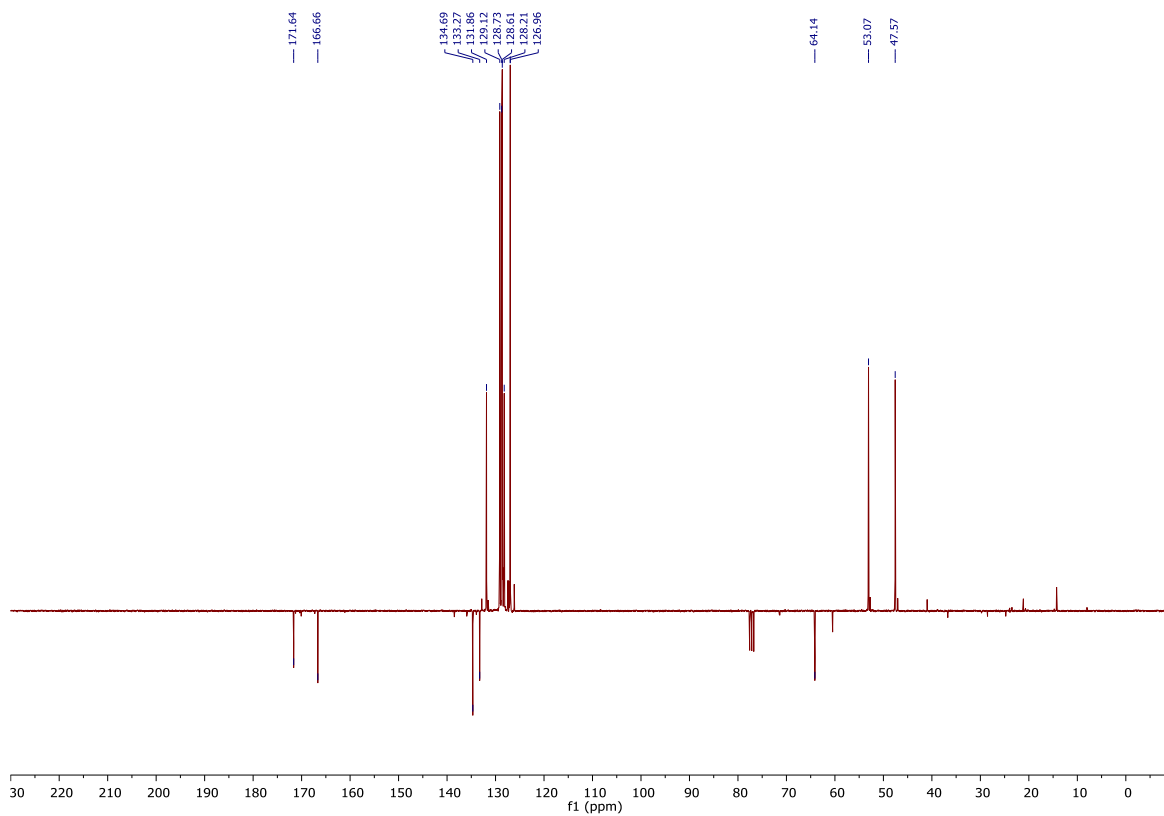

<sup>13</sup>C{<sup>1</sup>H} (APT) NMR spectrum (CDCl<sub>3</sub>, 75.5 MHz) of **2a**

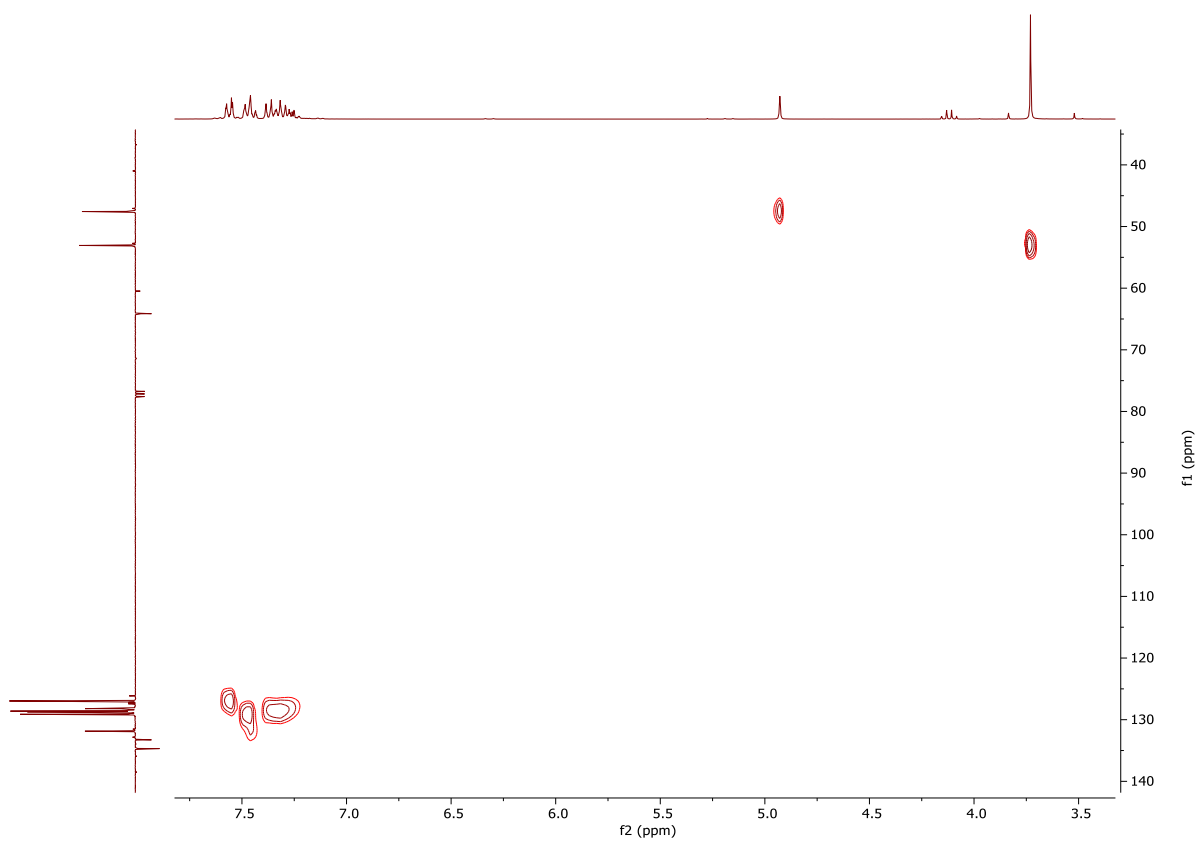

$^1\text{H}$ - $^{13}\text{C}$  HSQC ( $\text{CDCl}_3$ ) correlation spectrum of **2a**

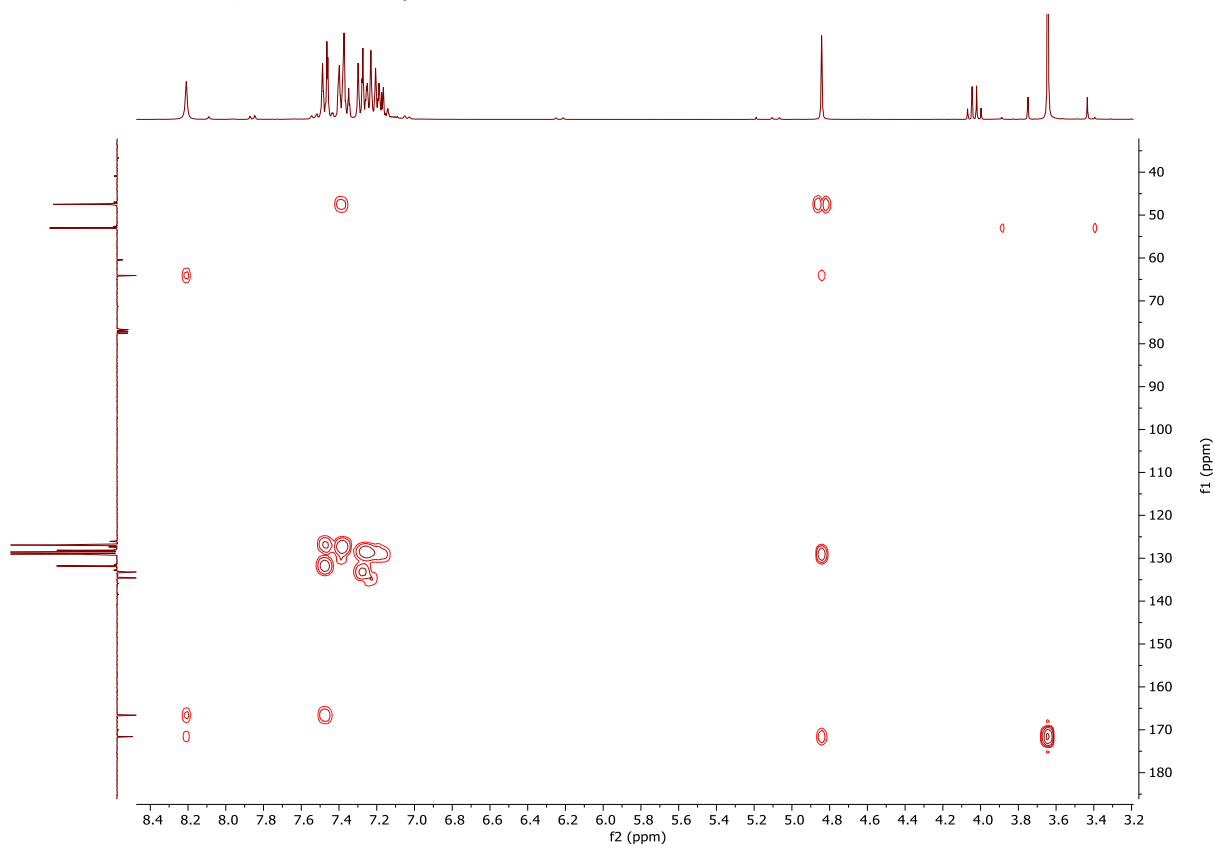

$^1\text{H}$ - $^{13}\text{C}$  HMBC ( $\text{CDCl}_3$ ) correlation spectrum of **2a**

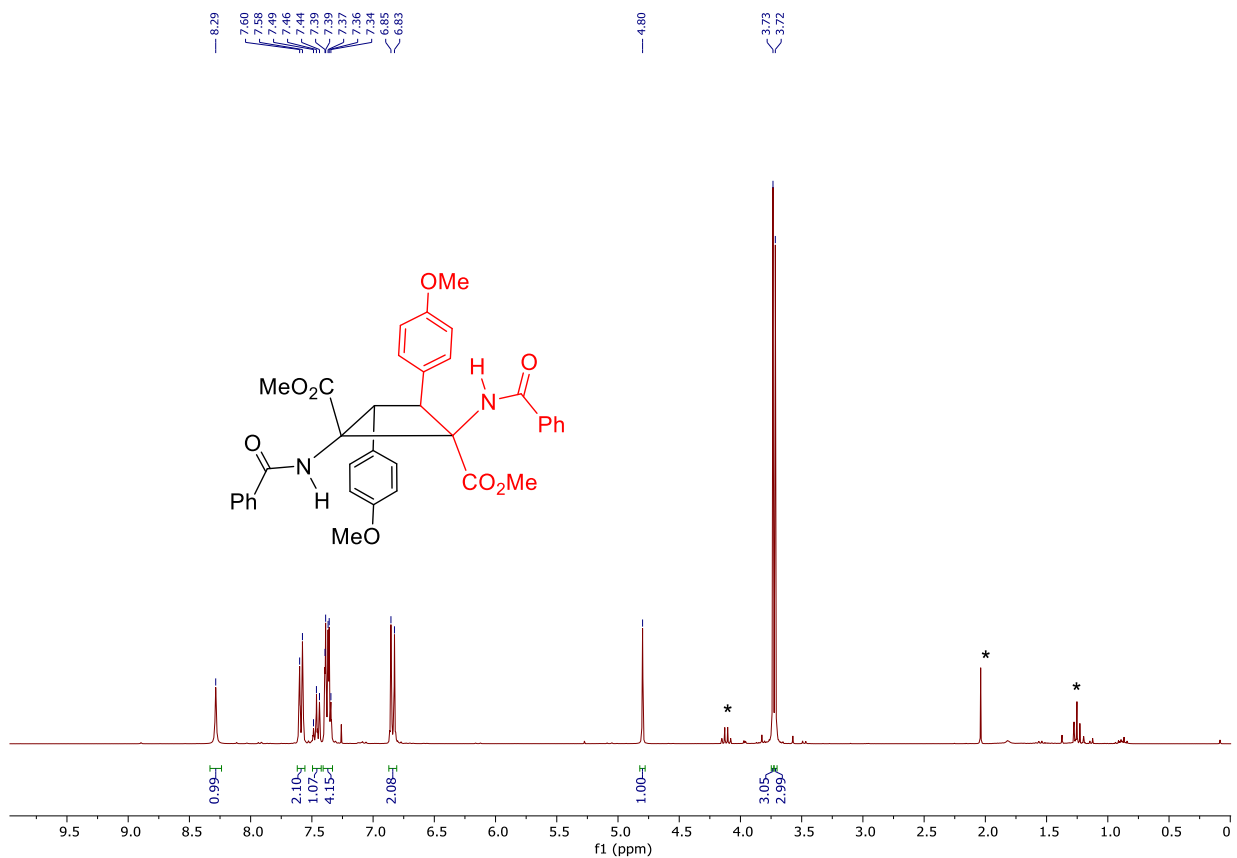

<sup>1</sup>H NMR spectrum (CDCl<sub>3</sub>, 300.13 MHz) of **2b** (\* = ethyl acetate)

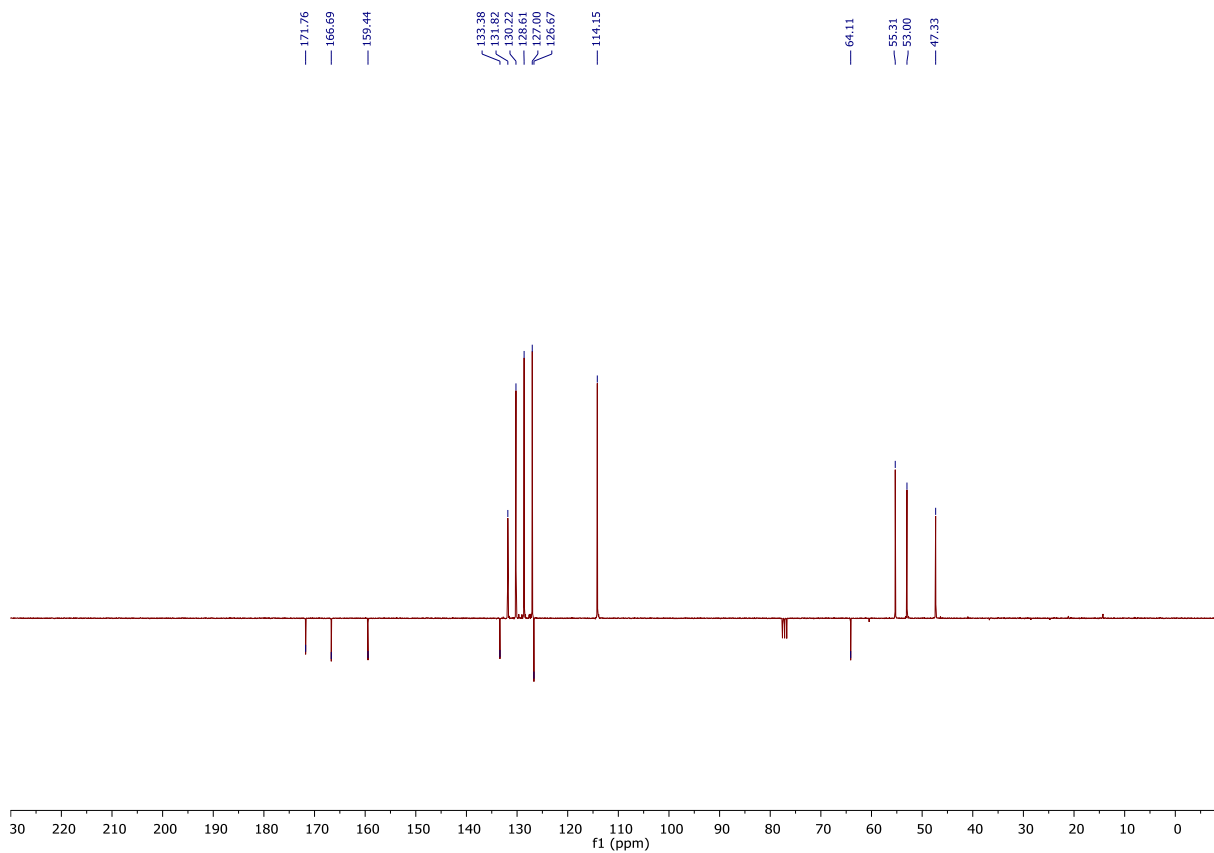

<sup>13</sup>C{<sup>1</sup>H} NMR spectrum (CDCl<sub>3</sub>, 75.5 MHz) of **2b**

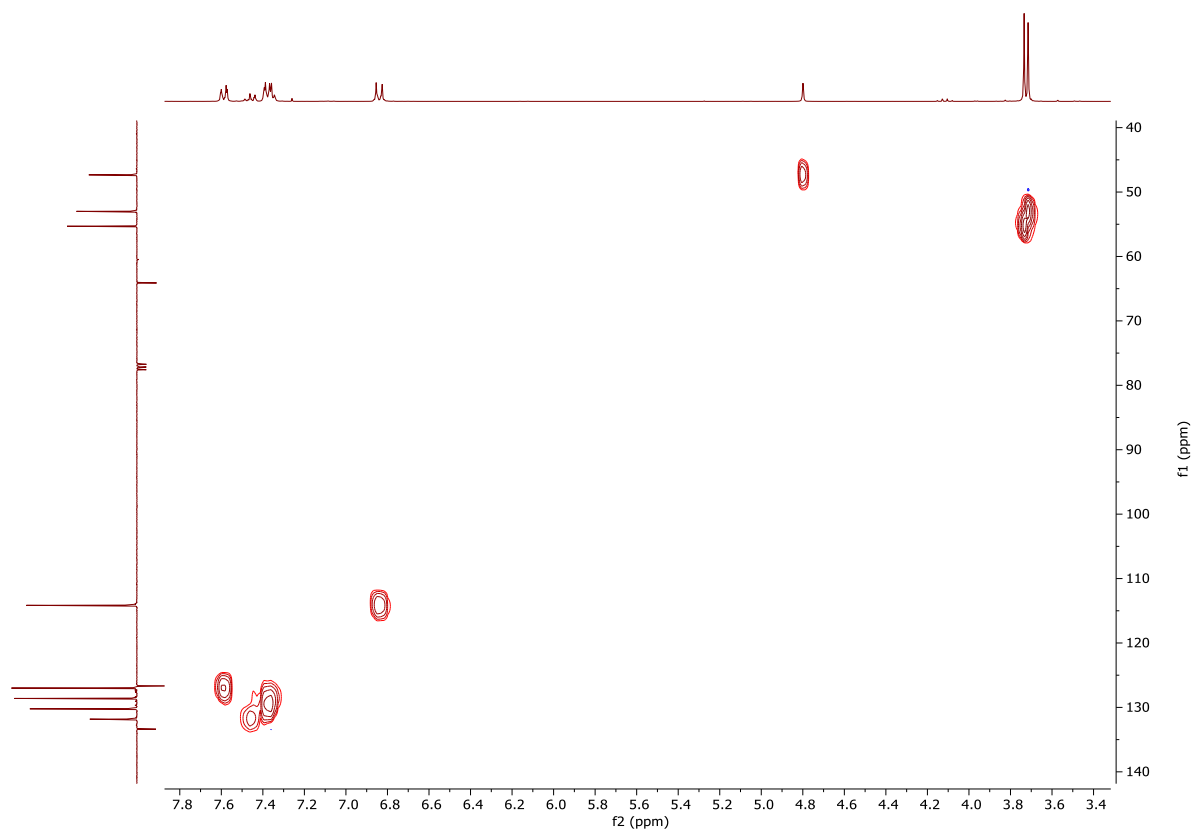

$^1\text{H}$ - $^{13}\text{C}$  HSQC ( $\text{CDCl}_3$ ) correlation spectrum of **2b**

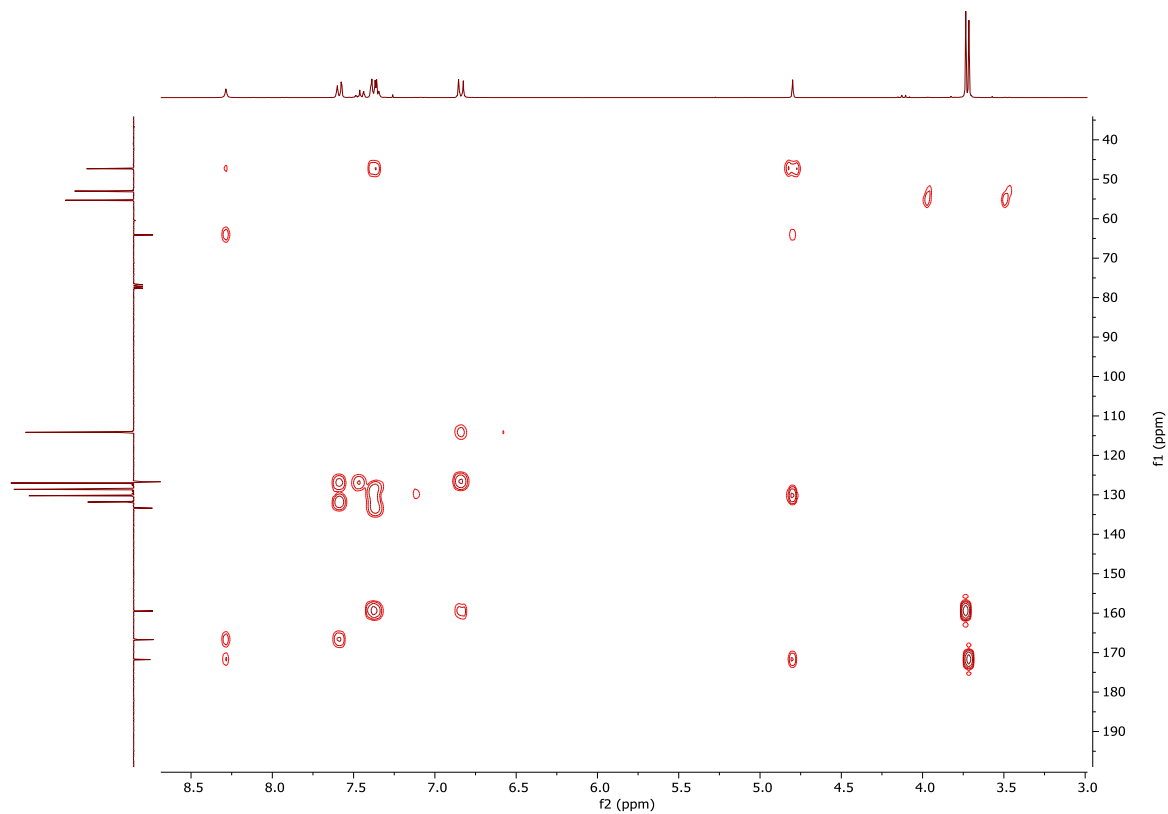

$^1\text{H}$ - $^{13}\text{C}$  HMBC ( $\text{CDCl}_3$ ) correlation spectrum of **2b**

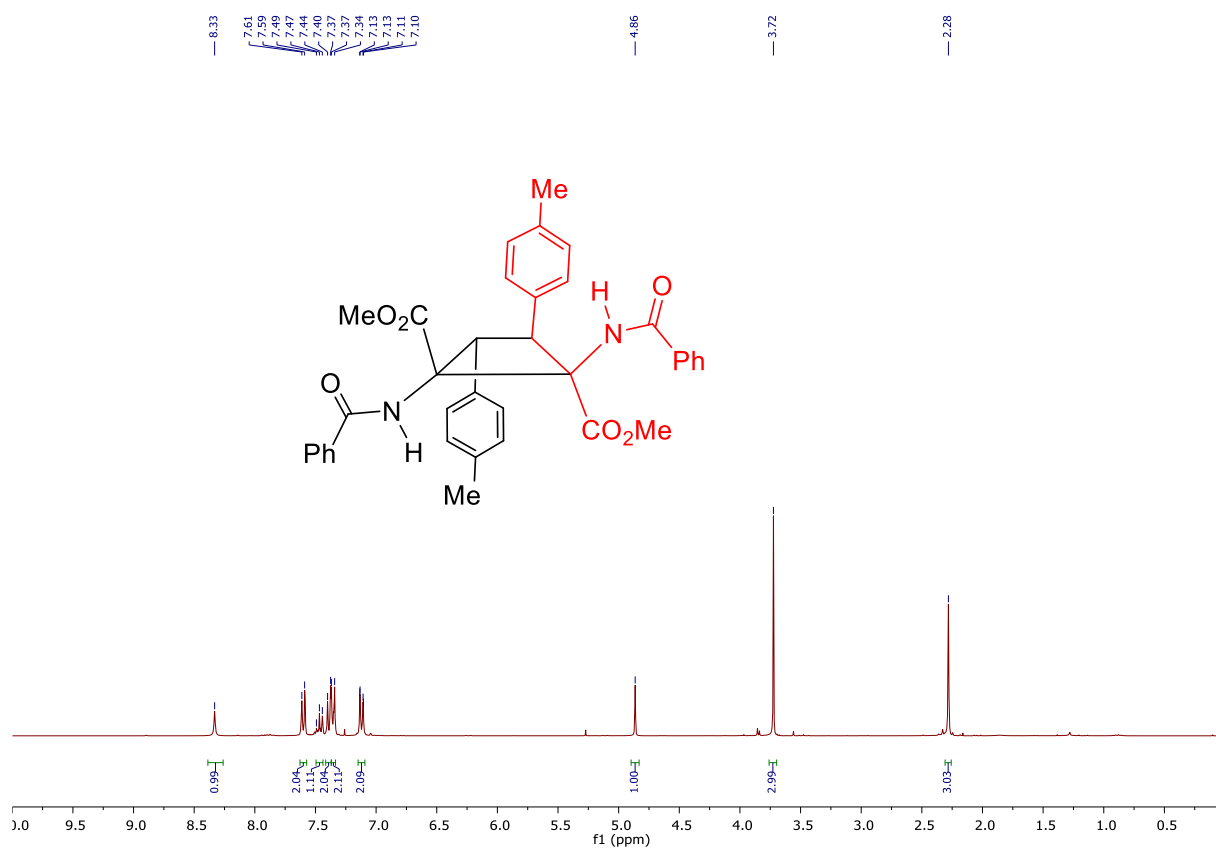

**<sup>1</sup>H NMR spectrum (CDCl<sub>3</sub>, 300.13 MHz) of **2c****

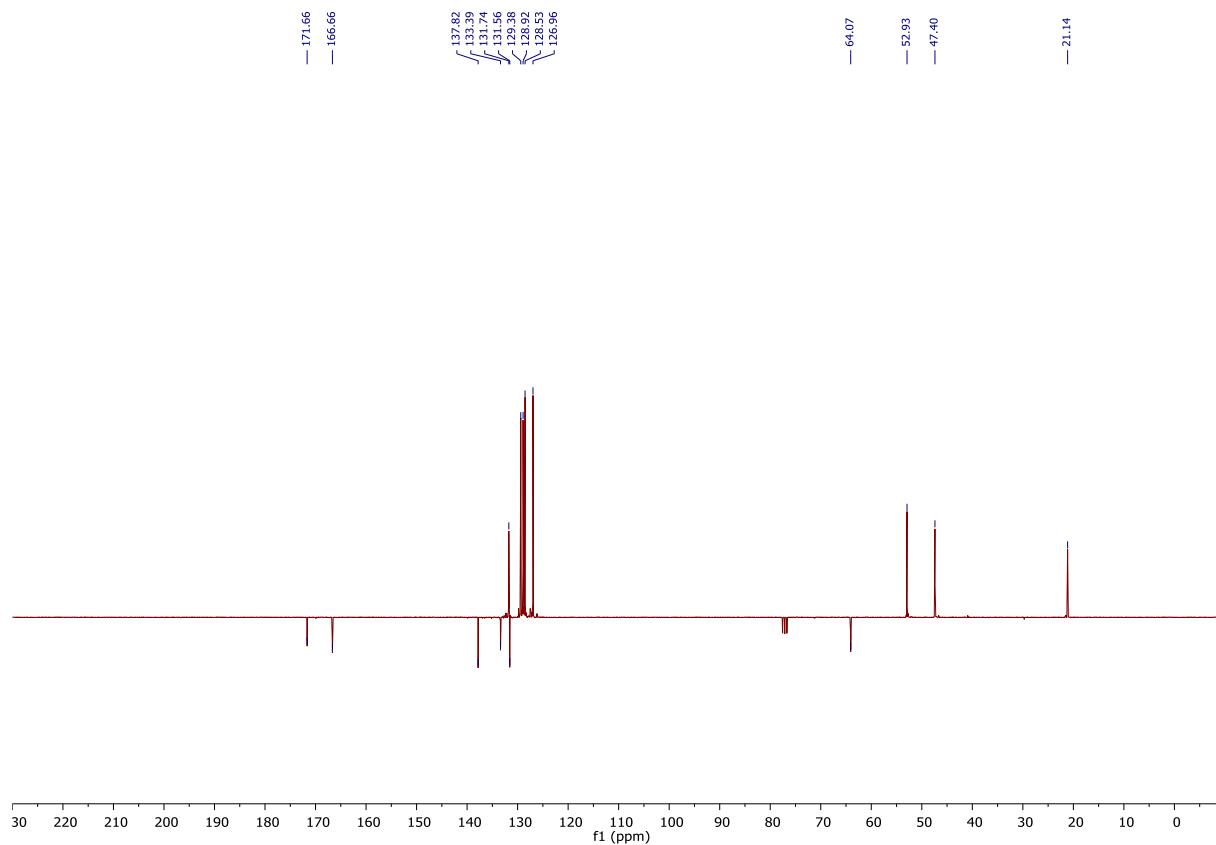

**<sup>13</sup>C{<sup>1</sup>H} (APT) NMR spectrum (CDCl<sub>3</sub>, 75.5 MHz) of **2c****

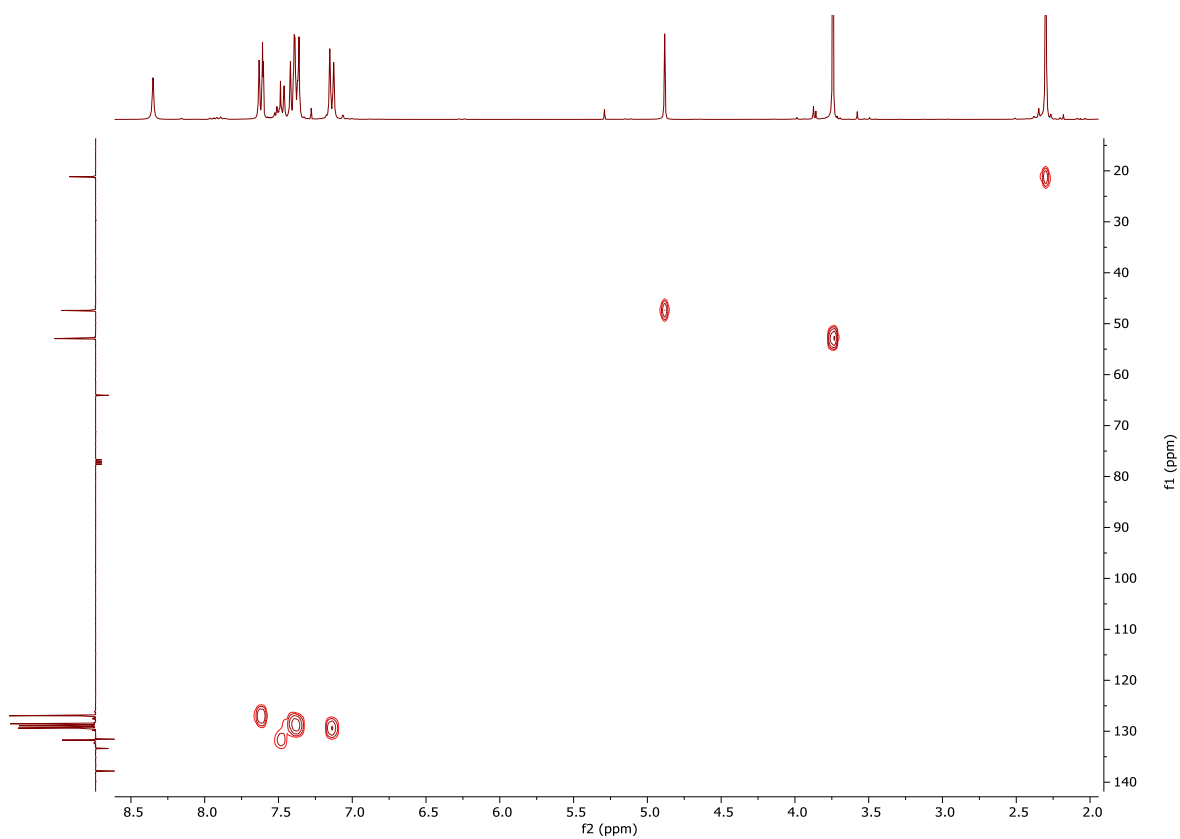

$^1\text{H}$ - $^{13}\text{C}$  HSQC ( $\text{CDCl}_3$ ) correlation spectrum of **2c**

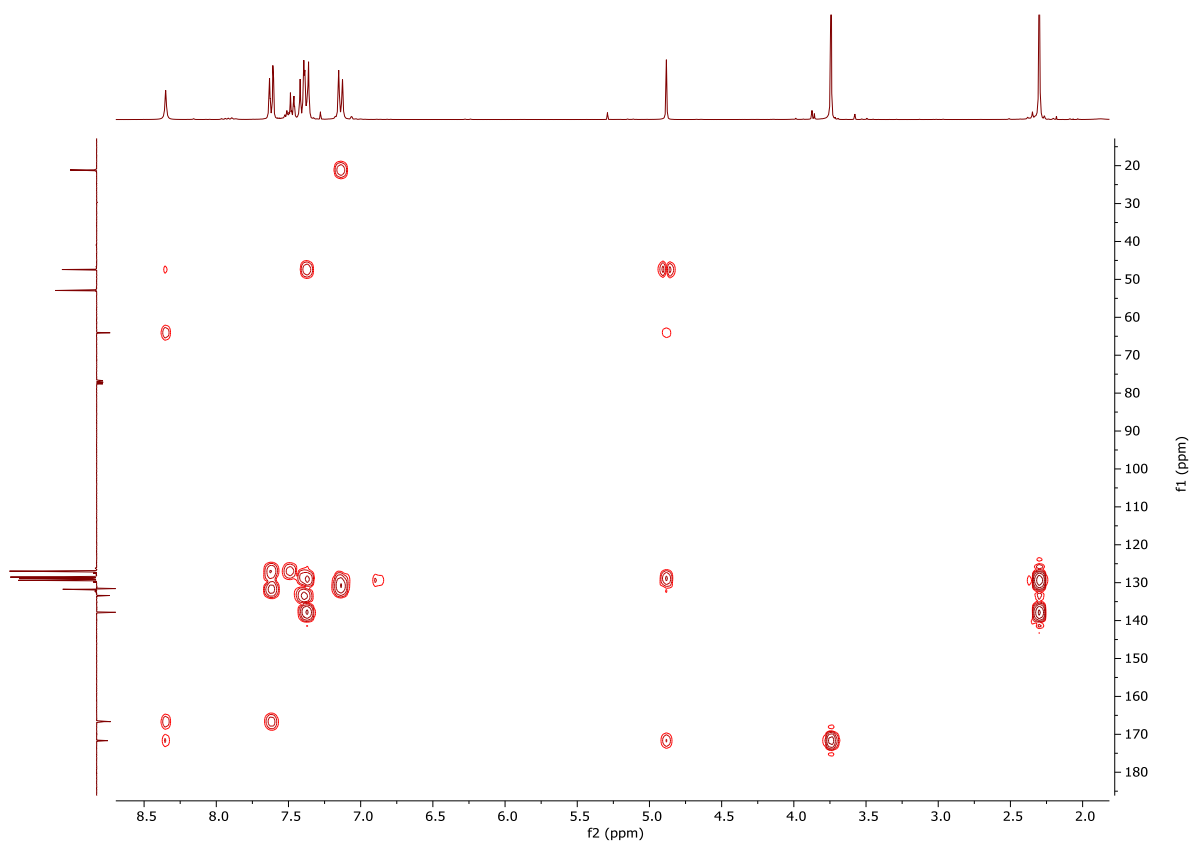

$^1\text{H}$ - $^{13}\text{C}$  HMBC ( $\text{CDCl}_3$ ) correlation spectrum of **2c**

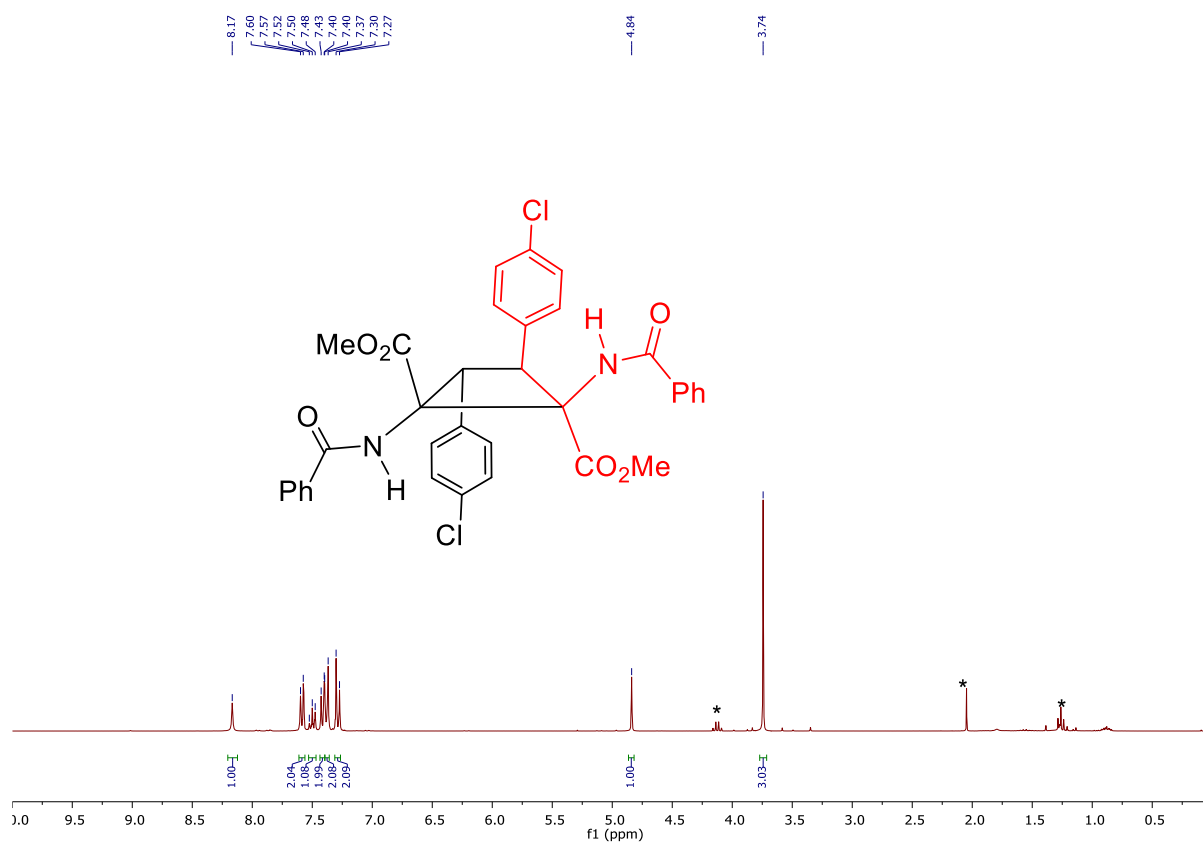

$^1\text{H}$  NMR spectrum ( $\text{CDCl}_3$ , 300.13 MHz) of **2d** (\* = ethyl acetate)

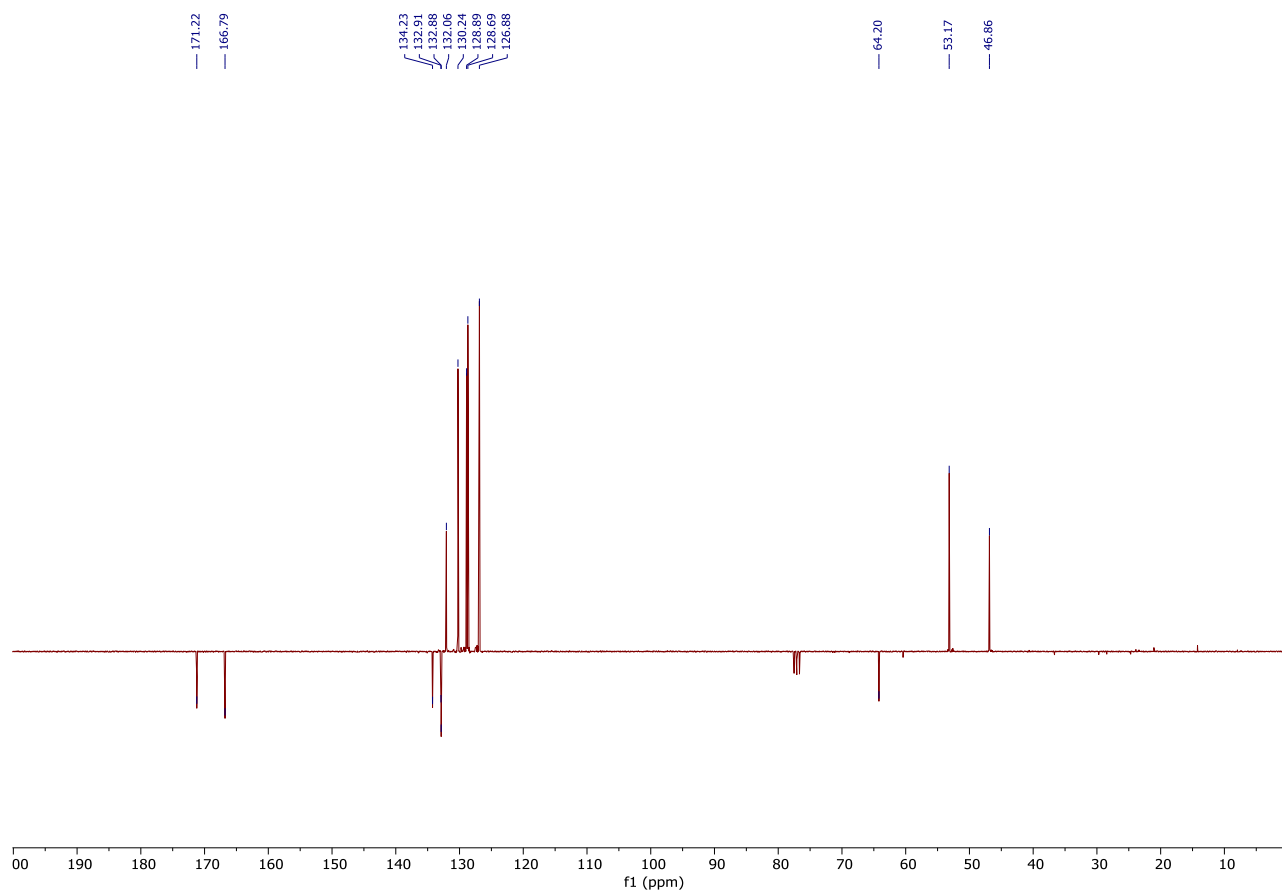

$^{13}\text{C}\{^1\text{H}\}$  (APT) NMR spectrum ( $\text{CDCl}_3$ , 75.5 MHz) of **2d**



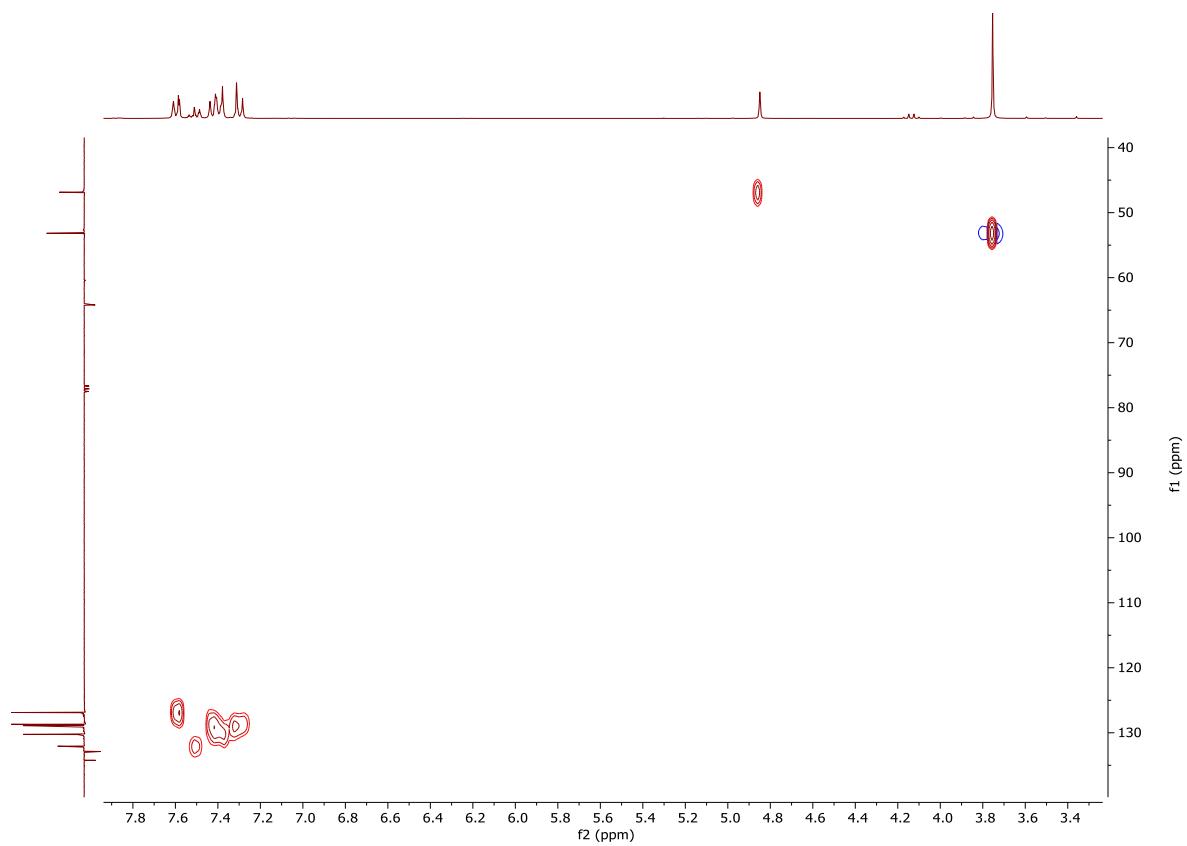

$^1\text{H}$ - $^{13}\text{C}$  HSQC ( $\text{CDCl}_3$ ) correlation spectrum of **2d**

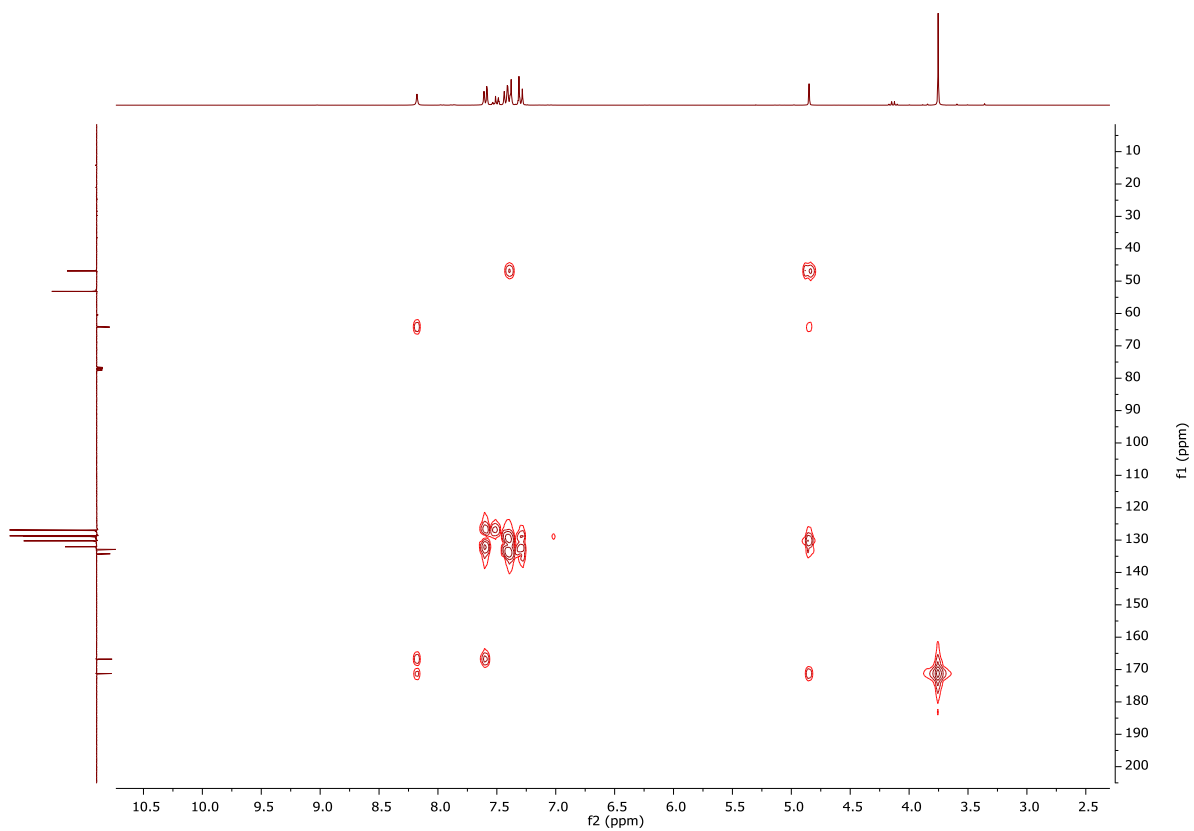

$^1\text{H}$ - $^{13}\text{C}$  HMBC ( $\text{CDCl}_3$ ) correlation spectrum of **2d**

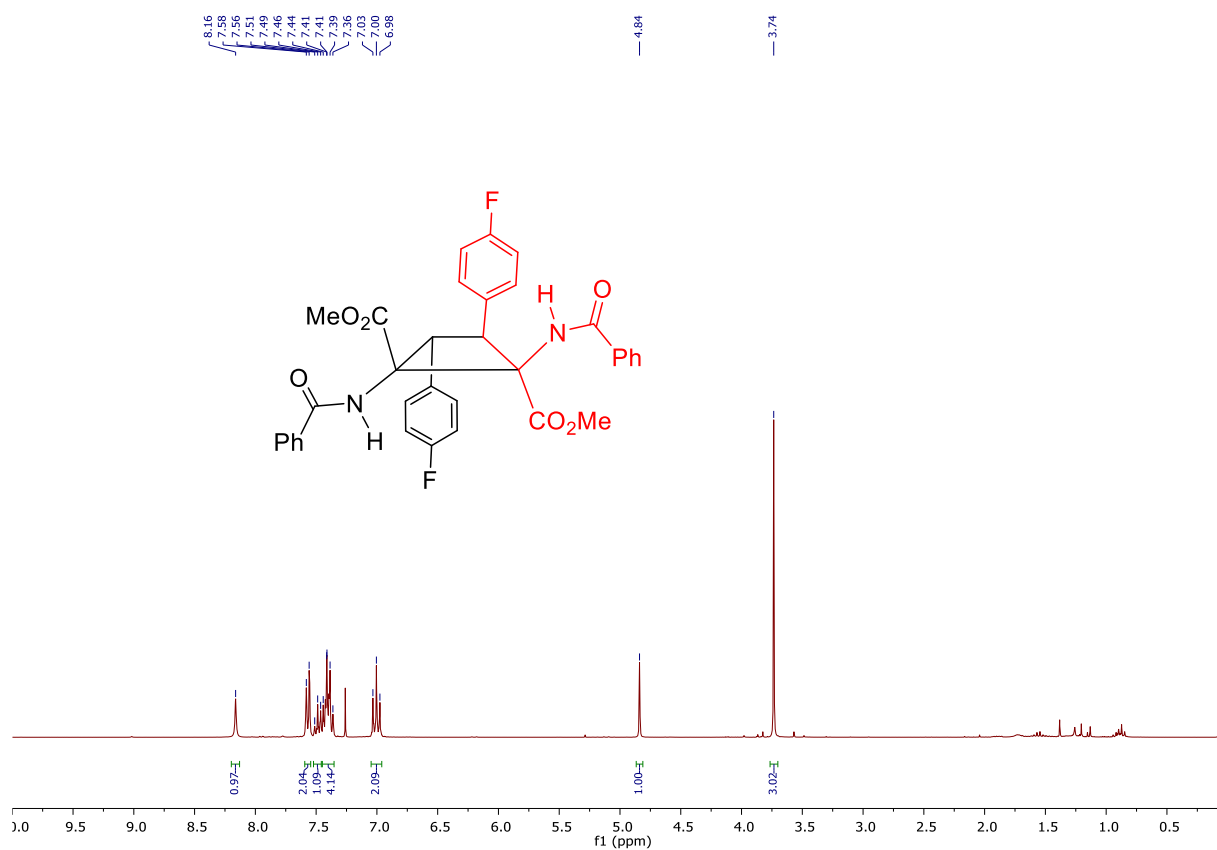

**<sup>1</sup>H NMR spectrum (CDCl<sub>3</sub>, 300.13 MHz) of **2e****

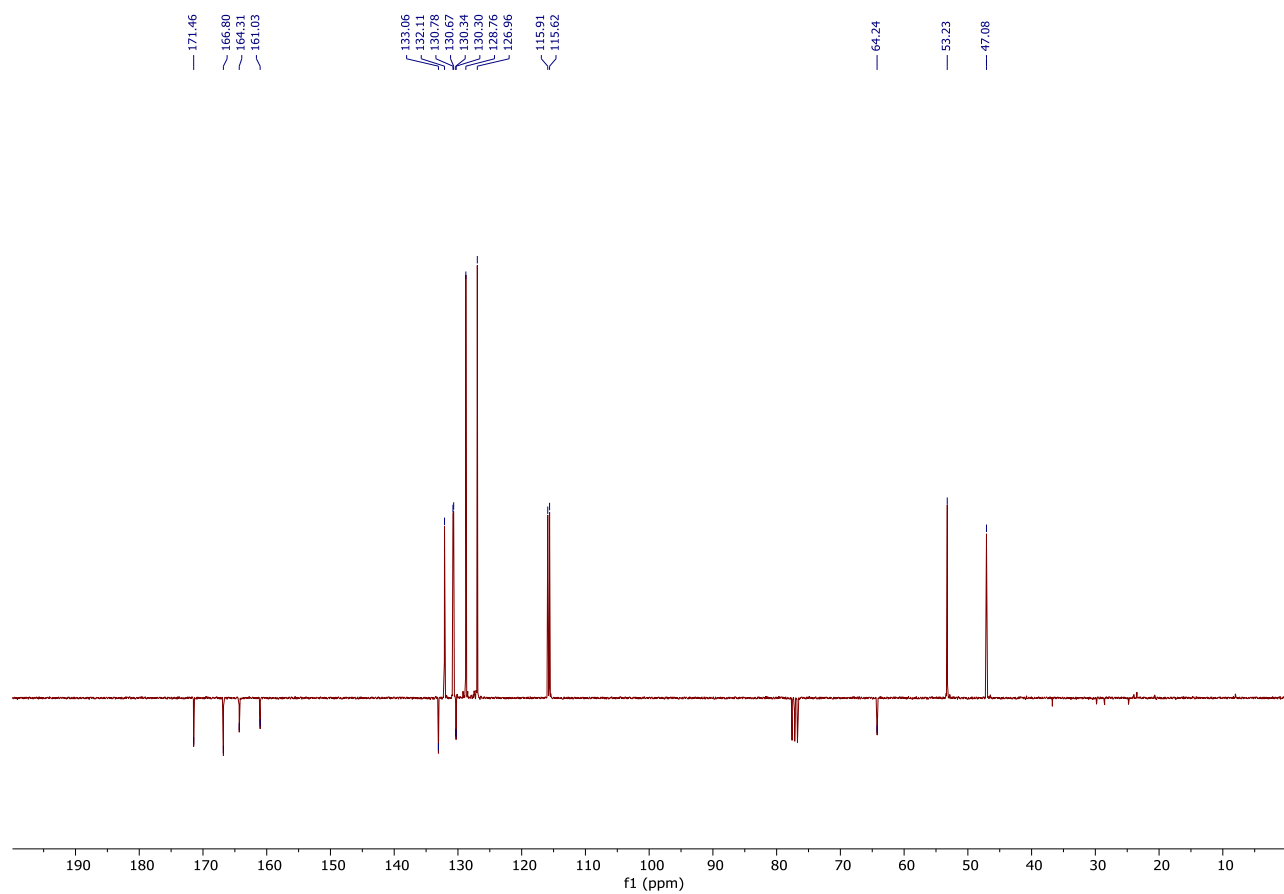

**<sup>13</sup>C{<sup>1</sup>H} (APT) NMR spectrum (CDCl<sub>3</sub>, 75.5 MHz) of **2e****

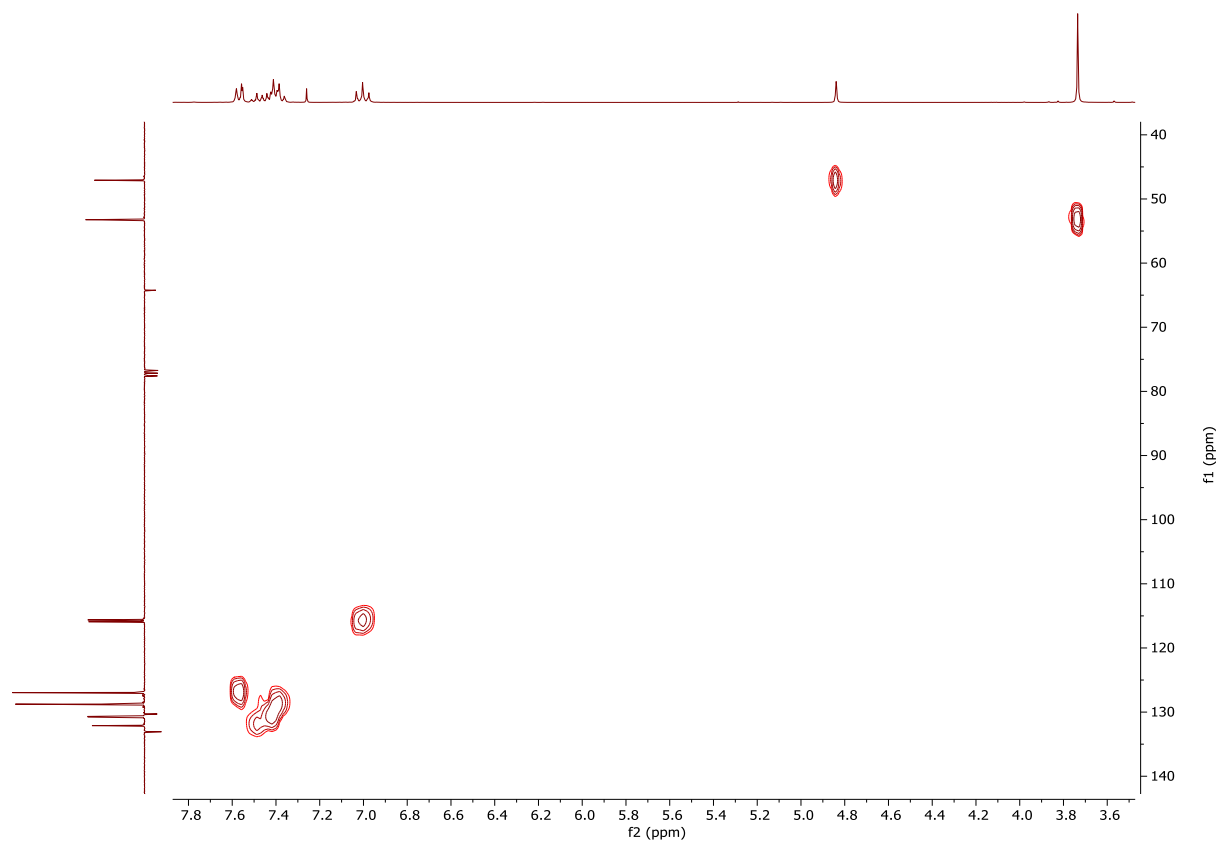

$^1\text{H}$ - $^{13}\text{C}$  HSQC ( $\text{CDCl}_3$ ) correlation spectrum of **2e**

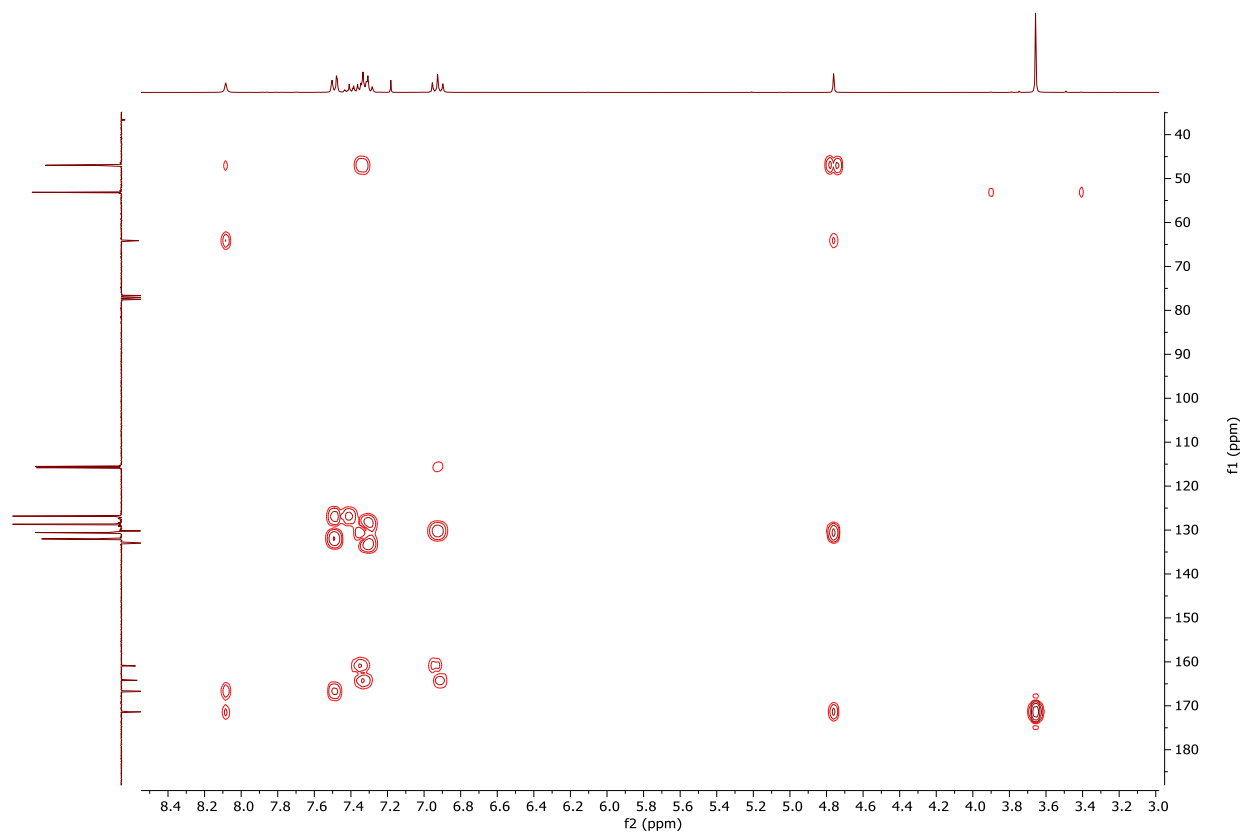

$^1\text{H}$ - $^{13}\text{C}$  HMBC ( $\text{CDCl}_3$ ) correlation spectrum of **2e**

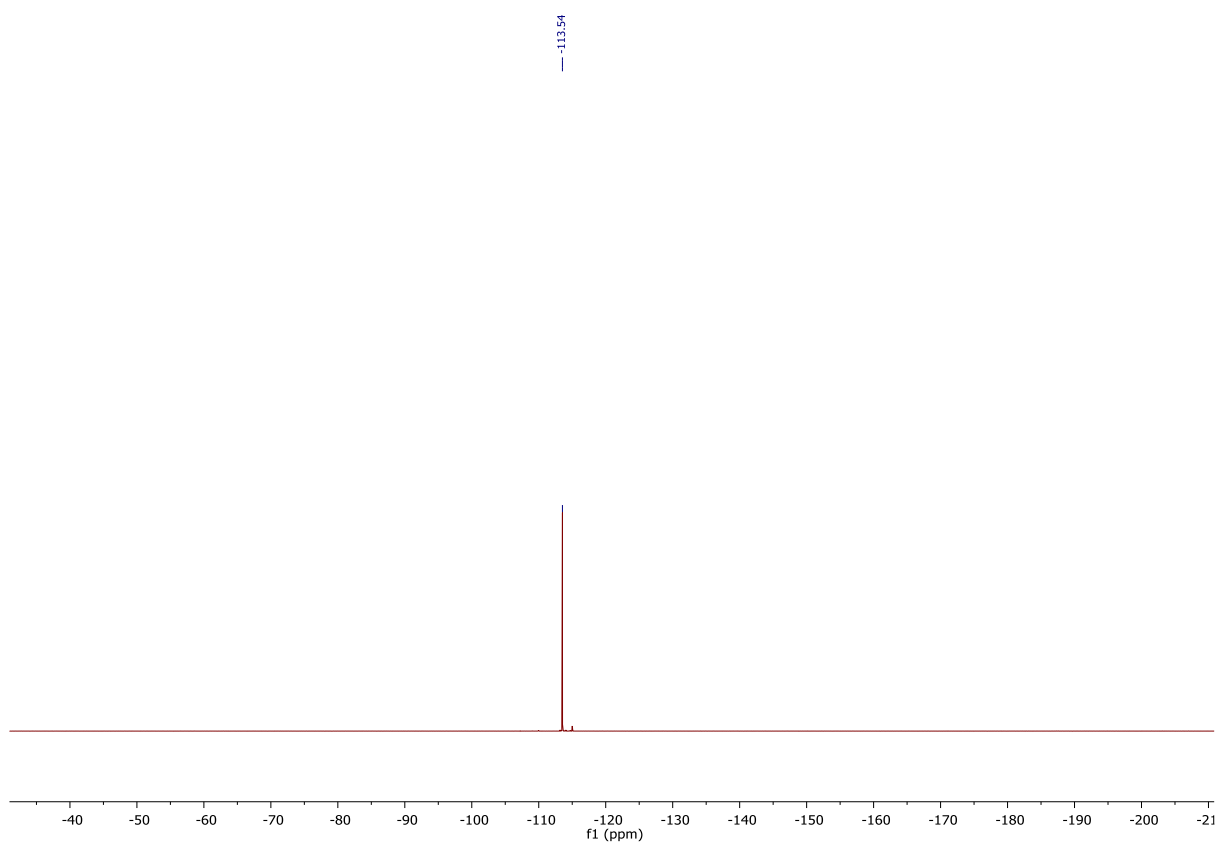

$^{19}\text{F}$  NMR spectrum ( $\text{CDCl}_3$ , 282.40 MHz) of **2e**

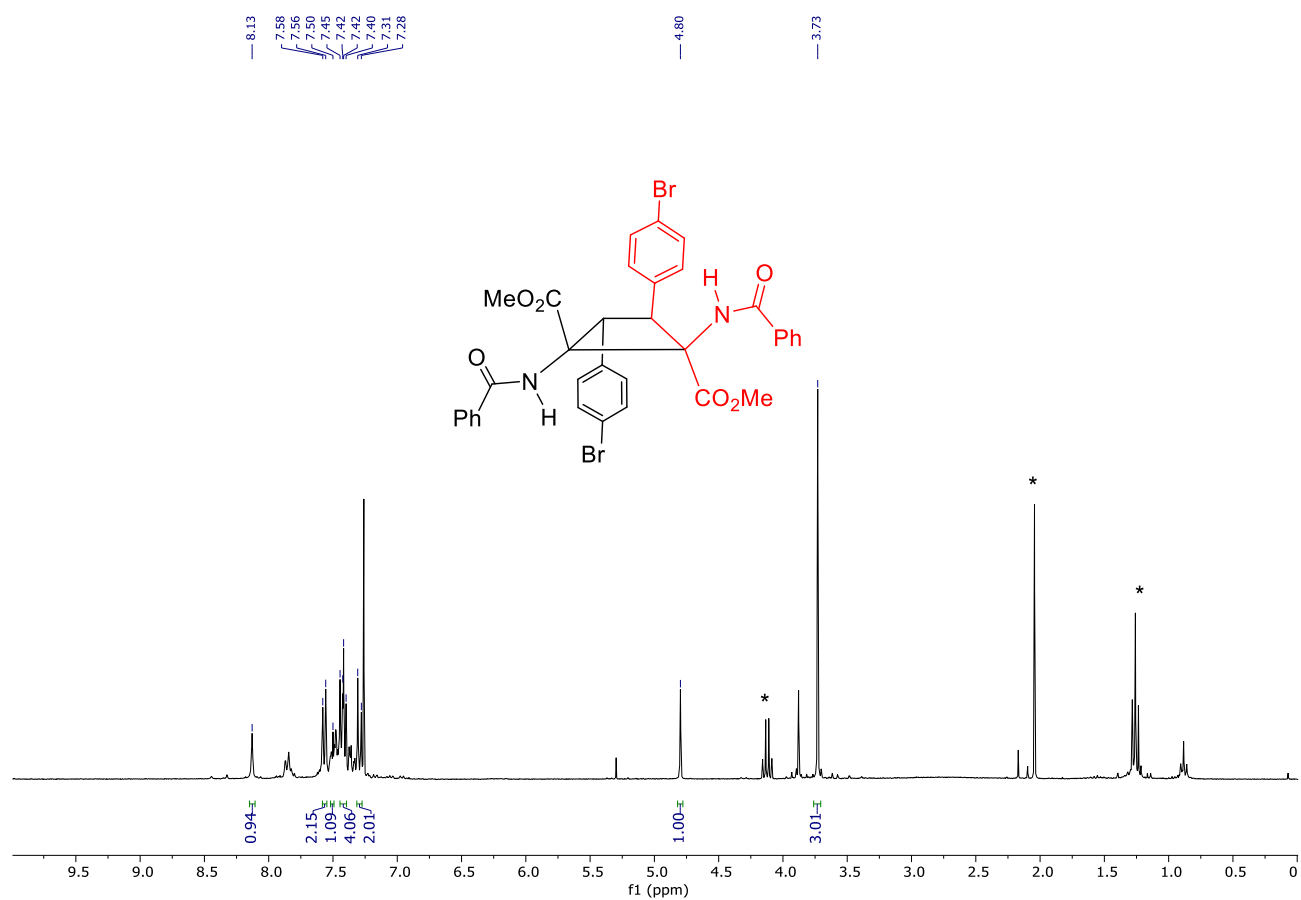

$^1\text{H}$  NMR spectrum ( $\text{CDCl}_3$ , 300.13 MHz) of **2f** (\* = ethyl acetate).

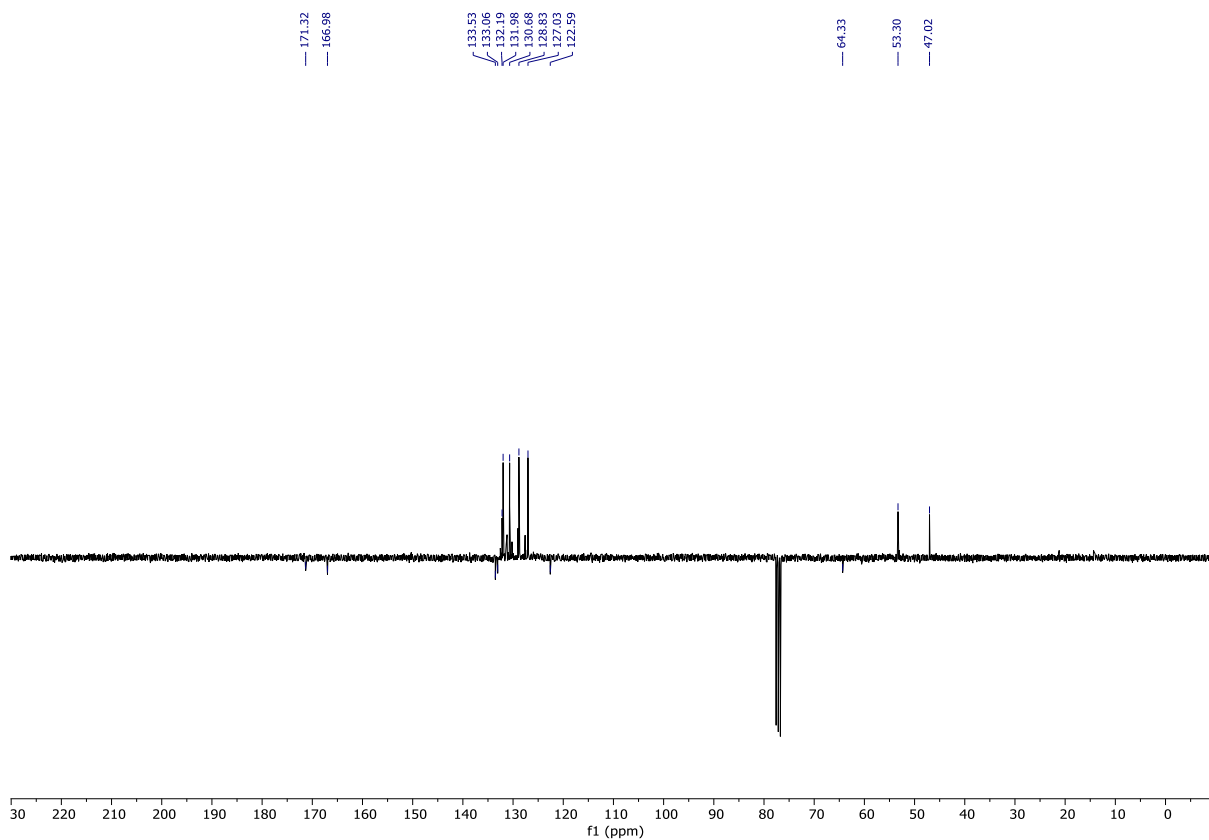

$^{13}\text{C}\{^1\text{H}\}$  (APT) NMR spectrum ( $\text{CDCl}_3$ , 75.5 MHz) of **2f**

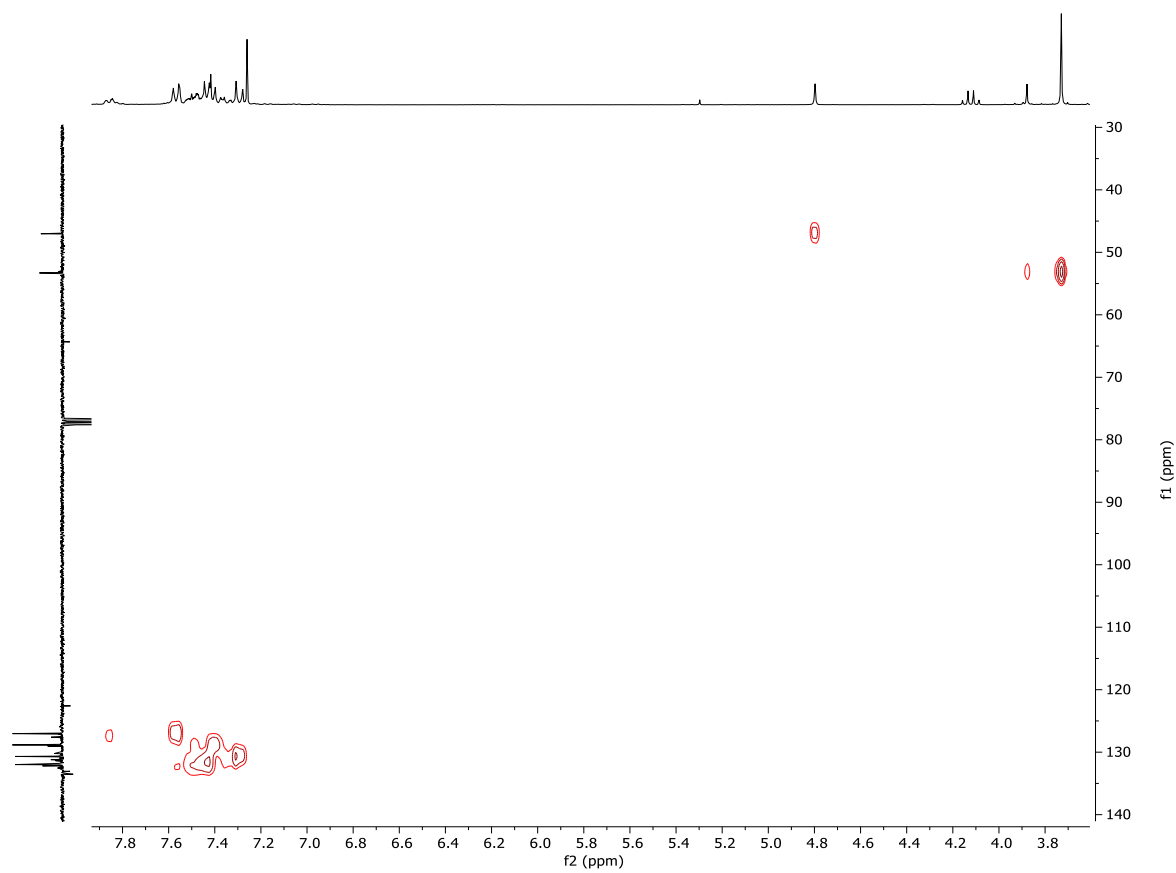

$^1\text{H}$ - $^{13}\text{C}$  HSQC ( $\text{CDCl}_3$ ) correlation spectrum of **2f**

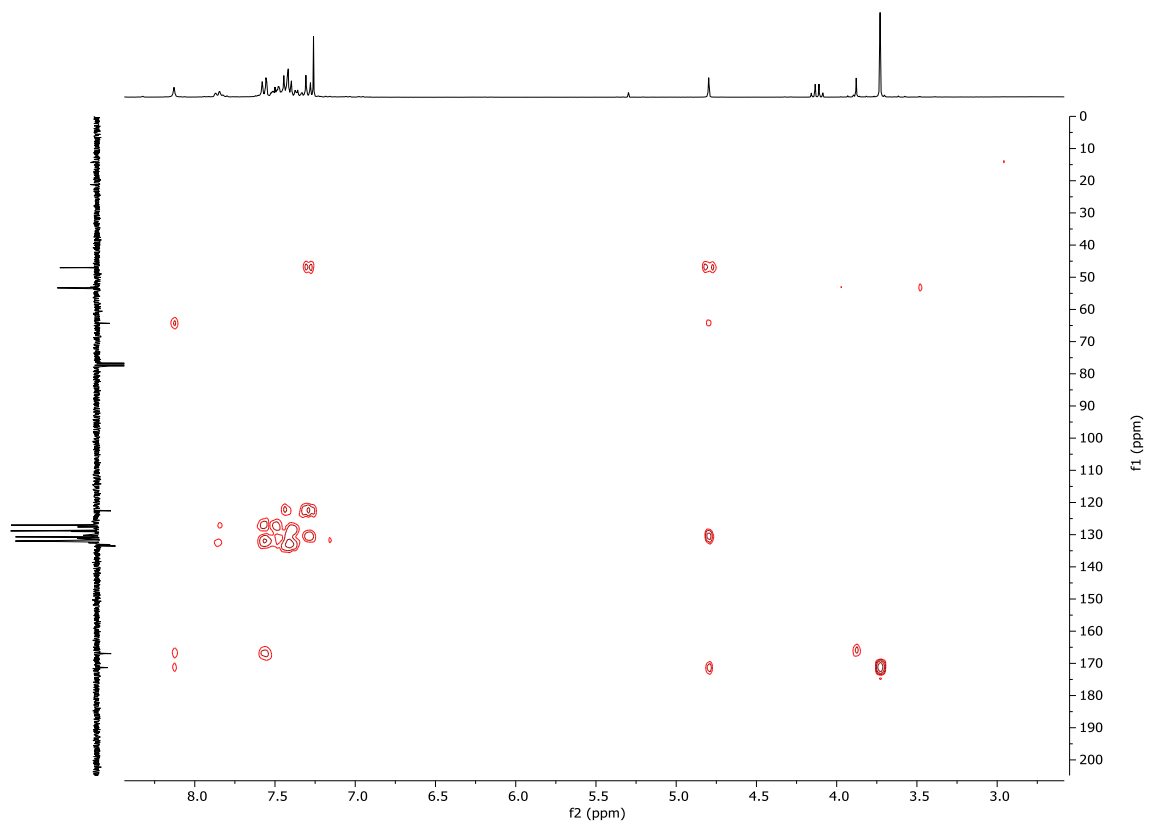

$^1\text{H}$ - $^{13}\text{C}$  HMBC ( $\text{CDCl}_3$ ) correlation spectrum of **2f**

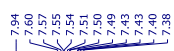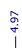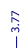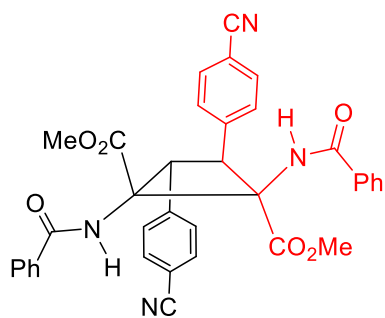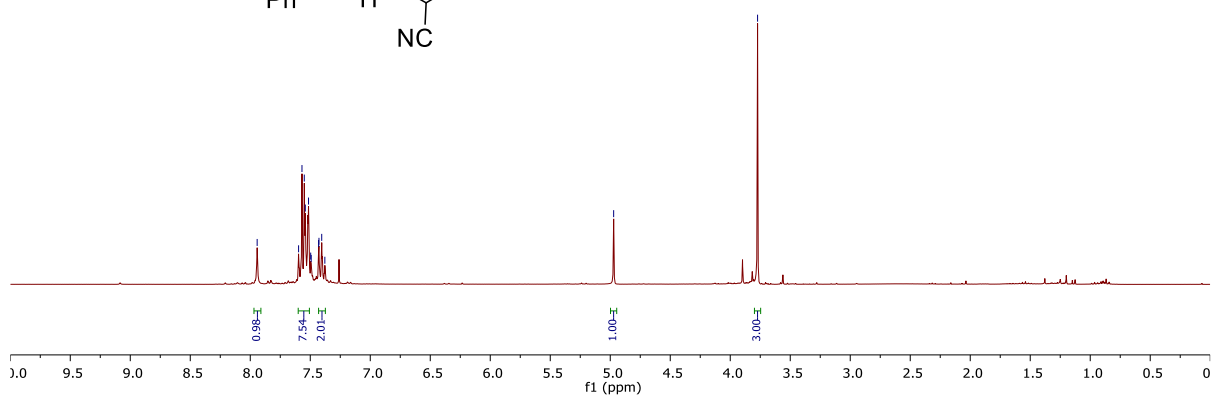

$^1\text{H}$  NMR spectrum ( $\text{CDCl}_3$ , 300.13 MHz) of **2g**

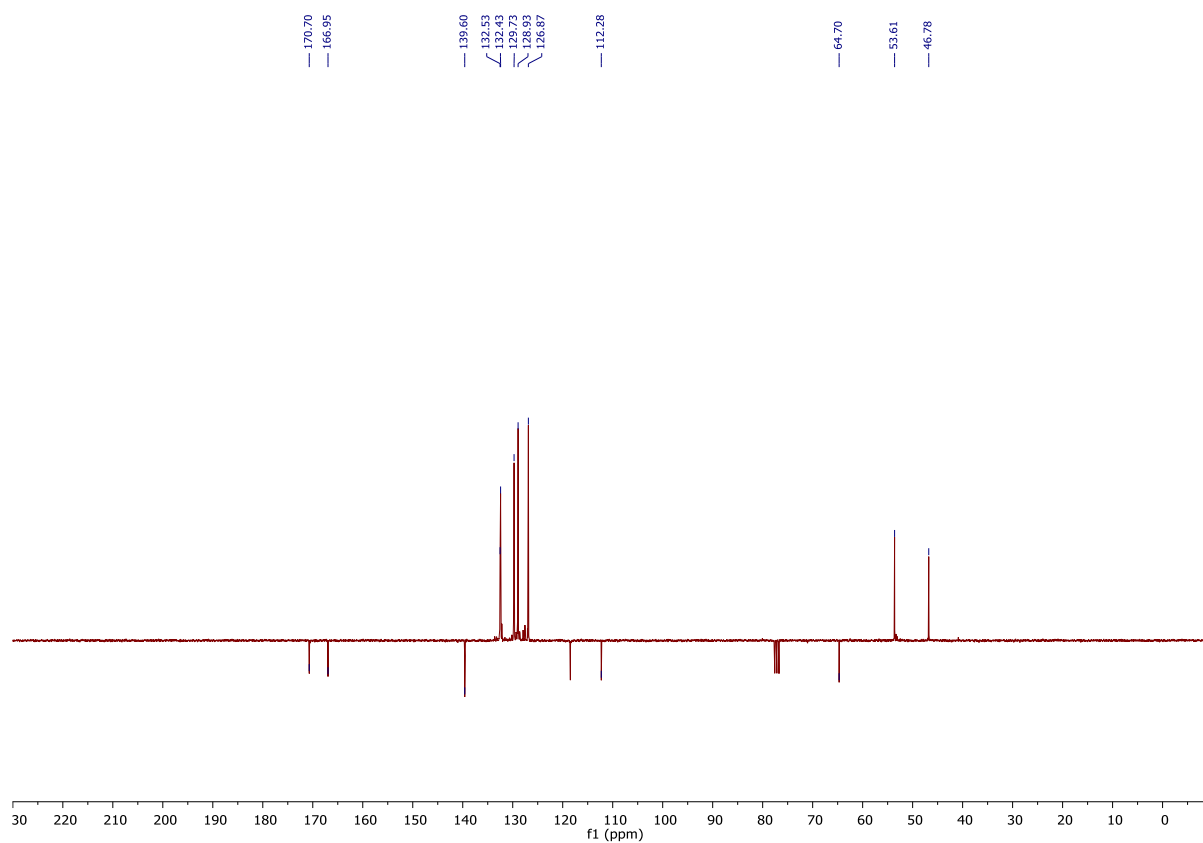

$^{13}\text{C}\{^1\text{H}\}$  (APT) NMR spectrum ( $\text{CDCl}_3$ , 75.5 MHz) of **2g**

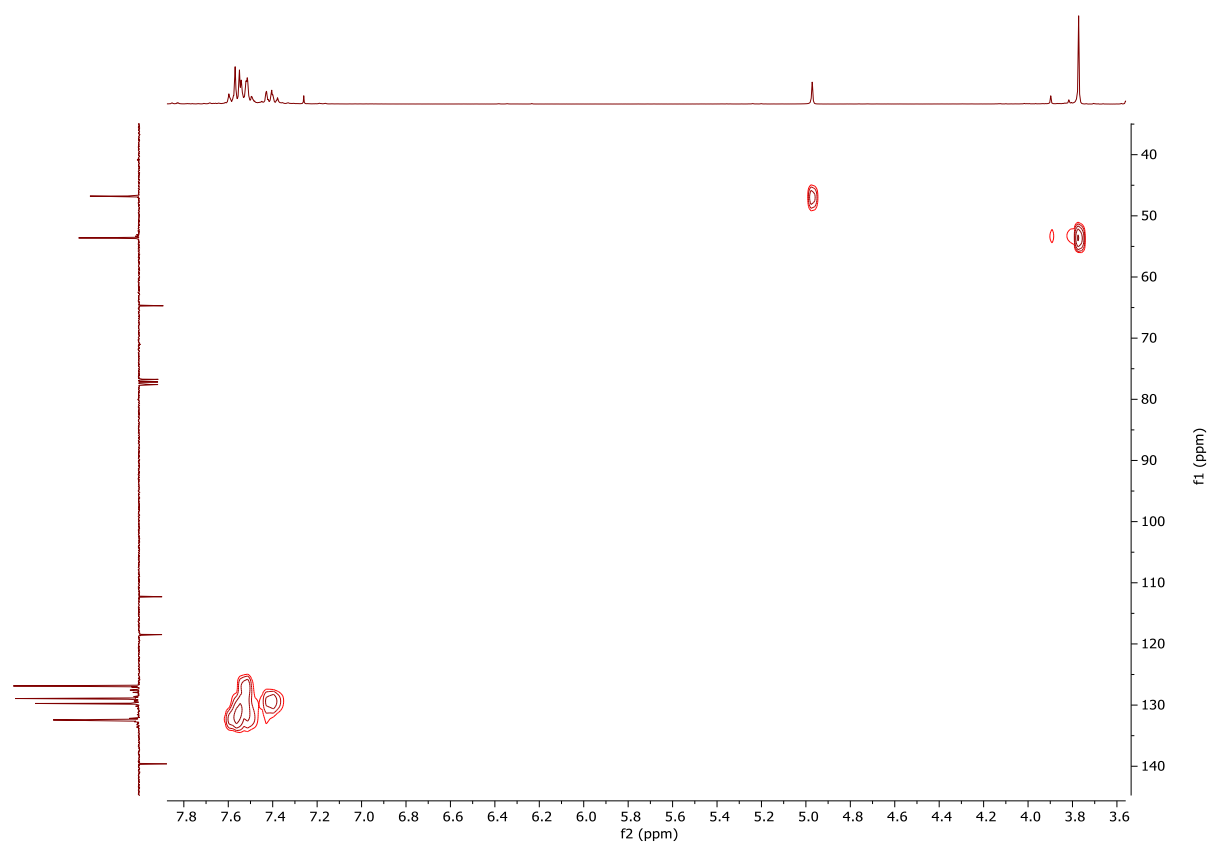

$^1\text{H}$ - $^{13}\text{C}$  HSQC ( $\text{CDCl}_3$ ) correlation spectrum of **2g**

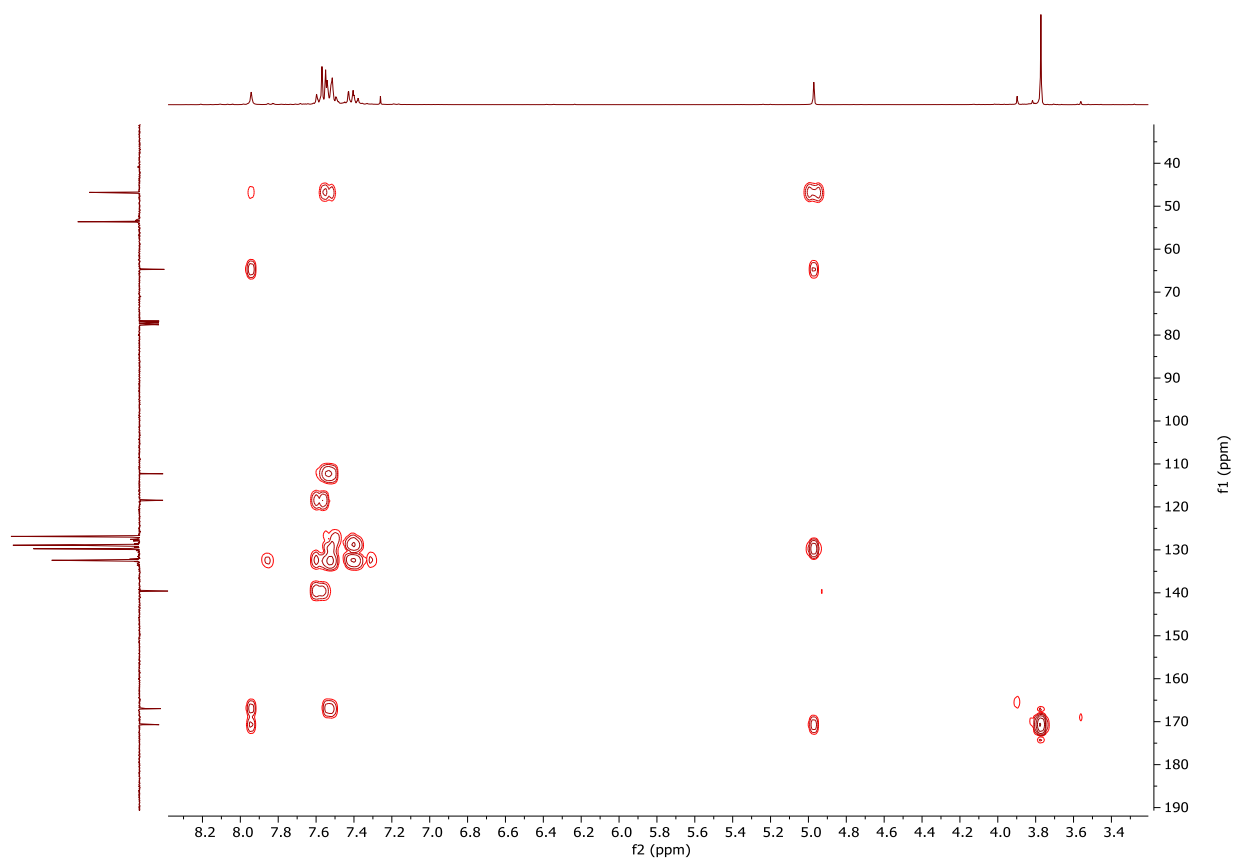

<sup>1</sup>H-<sup>13</sup>C HMBC (CDCl<sub>3</sub>) correlation spectrum of **2g**

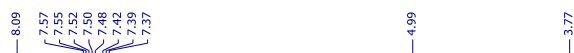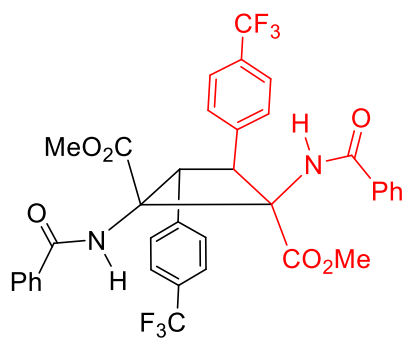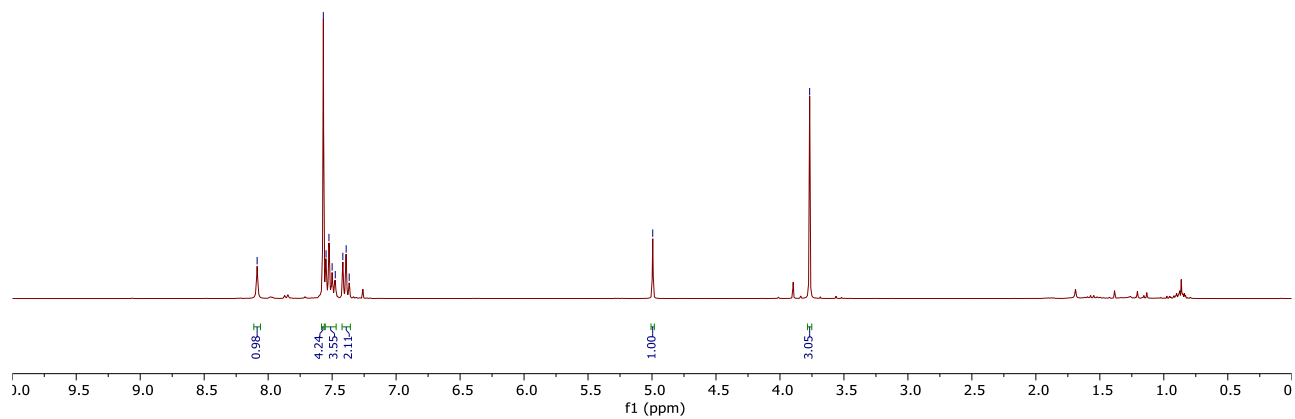

<sup>1</sup>H NMR spectrum (CDCl<sub>3</sub>, 300.13 MHz) of **2h**



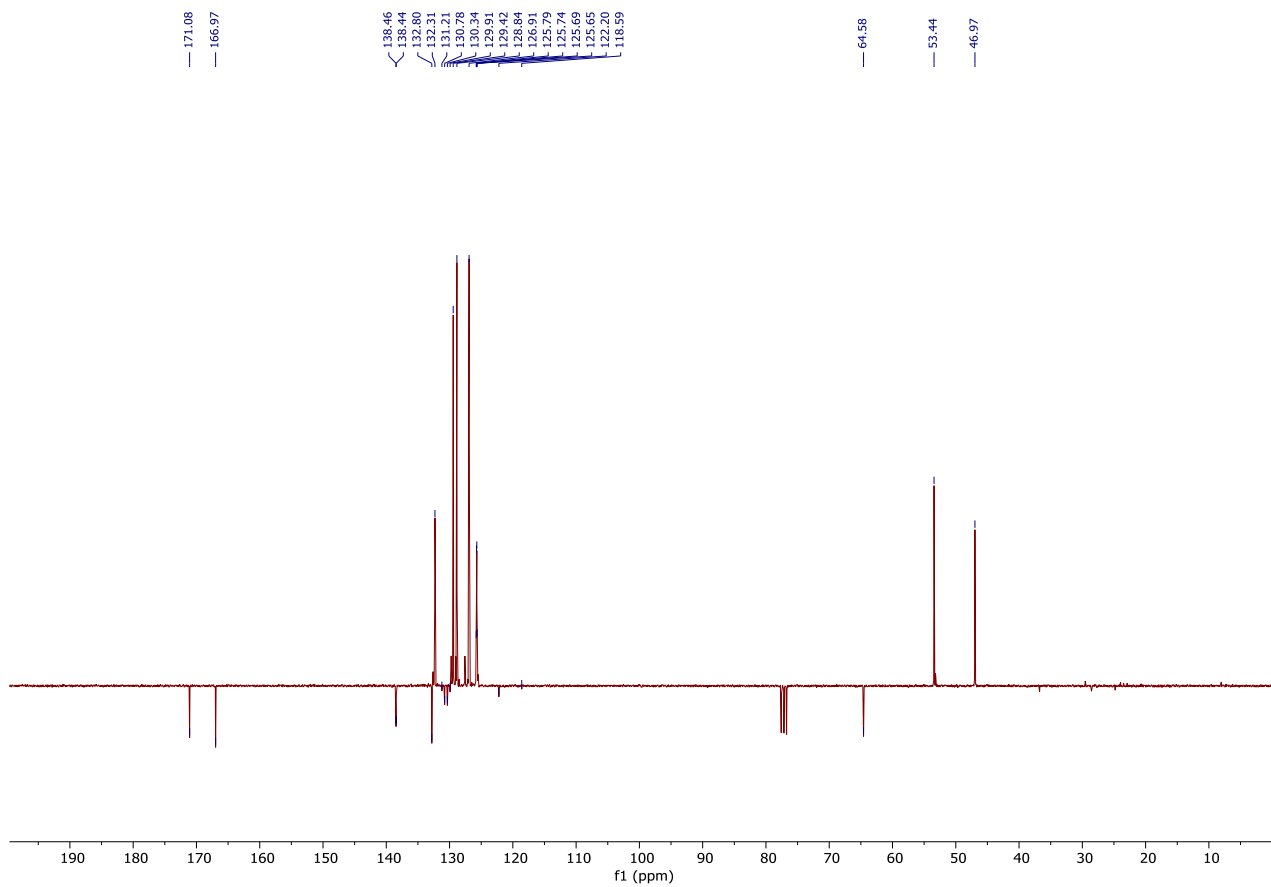

$^{13}\text{C}\{^1\text{H}\}$  (APT) NMR spectrum ( $\text{CDCl}_3$ , 75.5 MHz) of **2h**

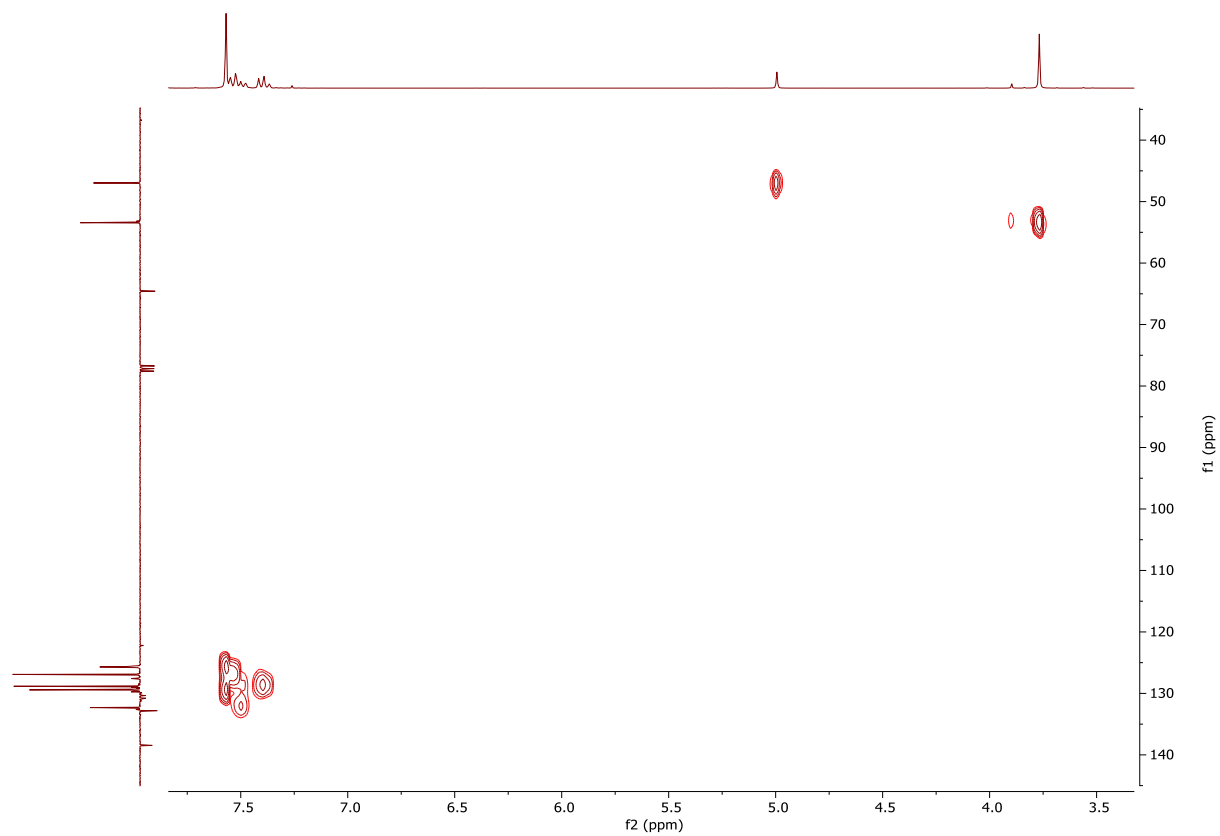

$^1\text{H}$ - $^{13}\text{C}$  HSQC ( $\text{CDCl}_3$ ) correlation spectrum of **2h**

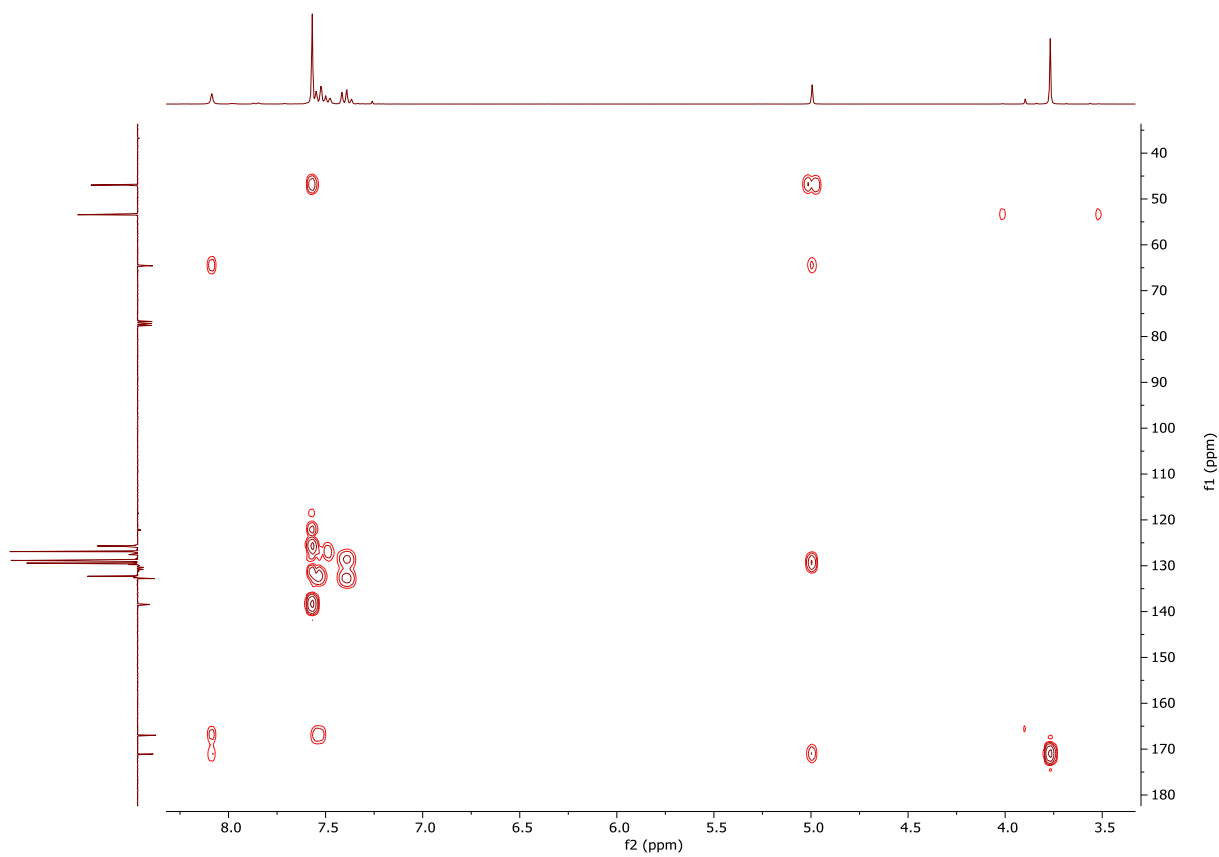

<sup>1</sup>H-<sup>13</sup>C HMBC (CDCl<sub>3</sub>) correlation spectrum of **2h**

-62.71

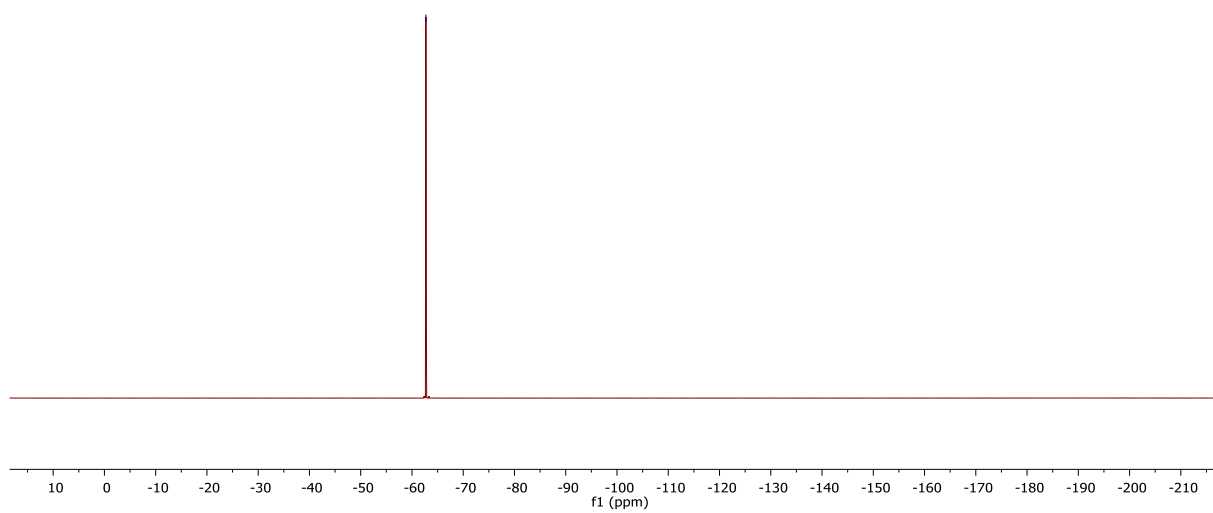

<sup>19</sup>F NMR spectrum (CDCl<sub>3</sub>, 282.40 MHz) of **2h**

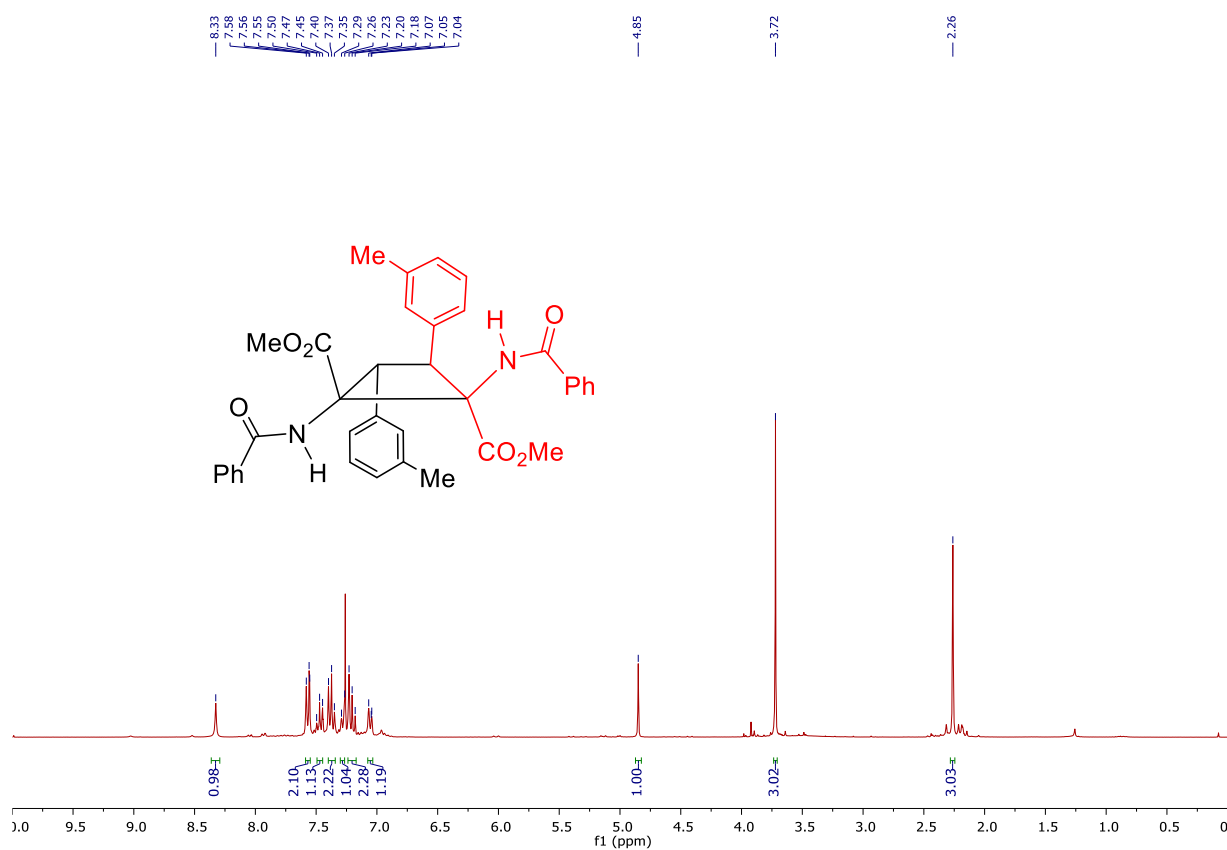

<sup>1</sup>H NMR spectrum (CDCl<sub>3</sub>, 300.13 MHz) of **2i**

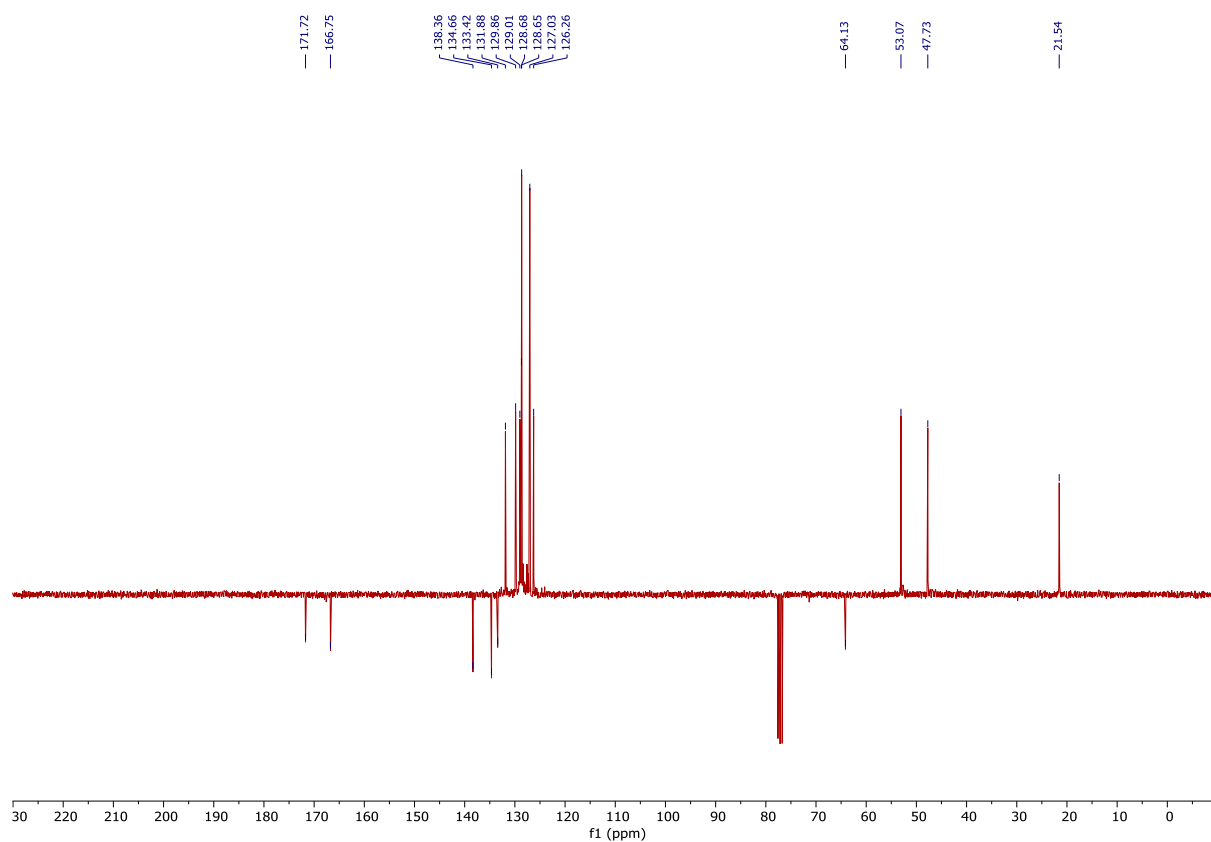

<sup>13</sup>C{<sup>1</sup>H} (APT) NMR spectrum (CDCl<sub>3</sub>, 75.5 MHz) of **2i**

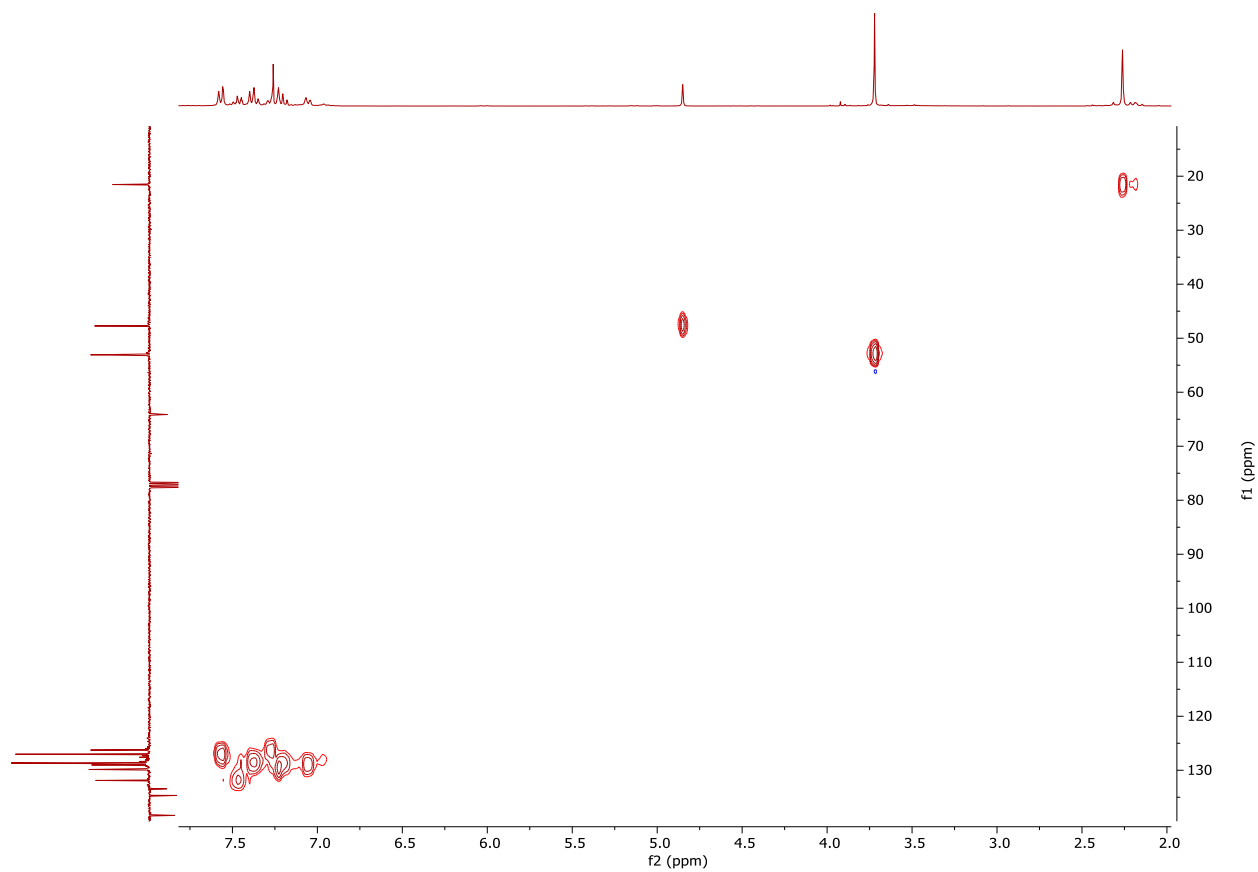

$^1\text{H}$ - $^{13}\text{C}$  HSQC ( $\text{CDCl}_3$ ) correlation spectrum of **2i**

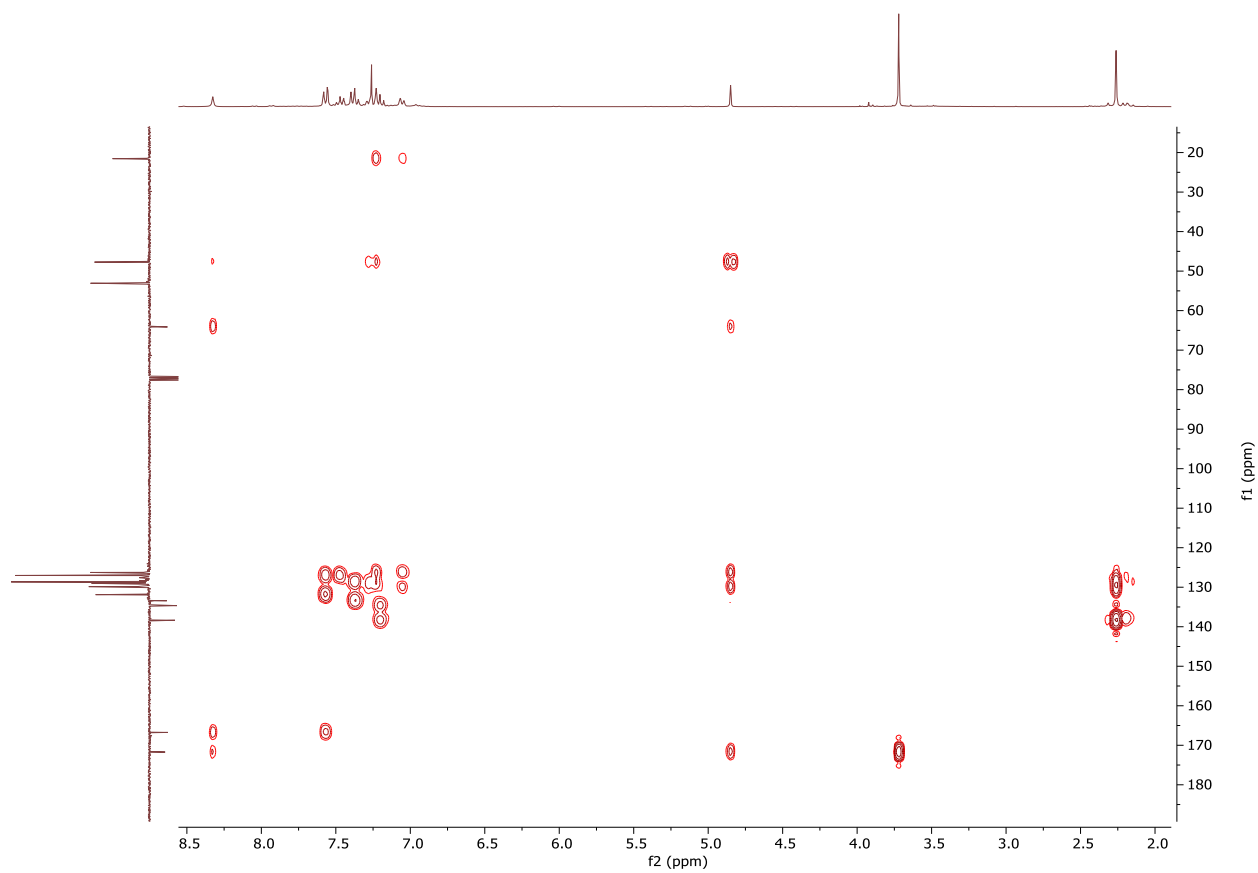

$^1\text{H}$ - $^{13}\text{C}$  HMBC ( $\text{CDCl}_3$ ) correlation spectrum of **2i**

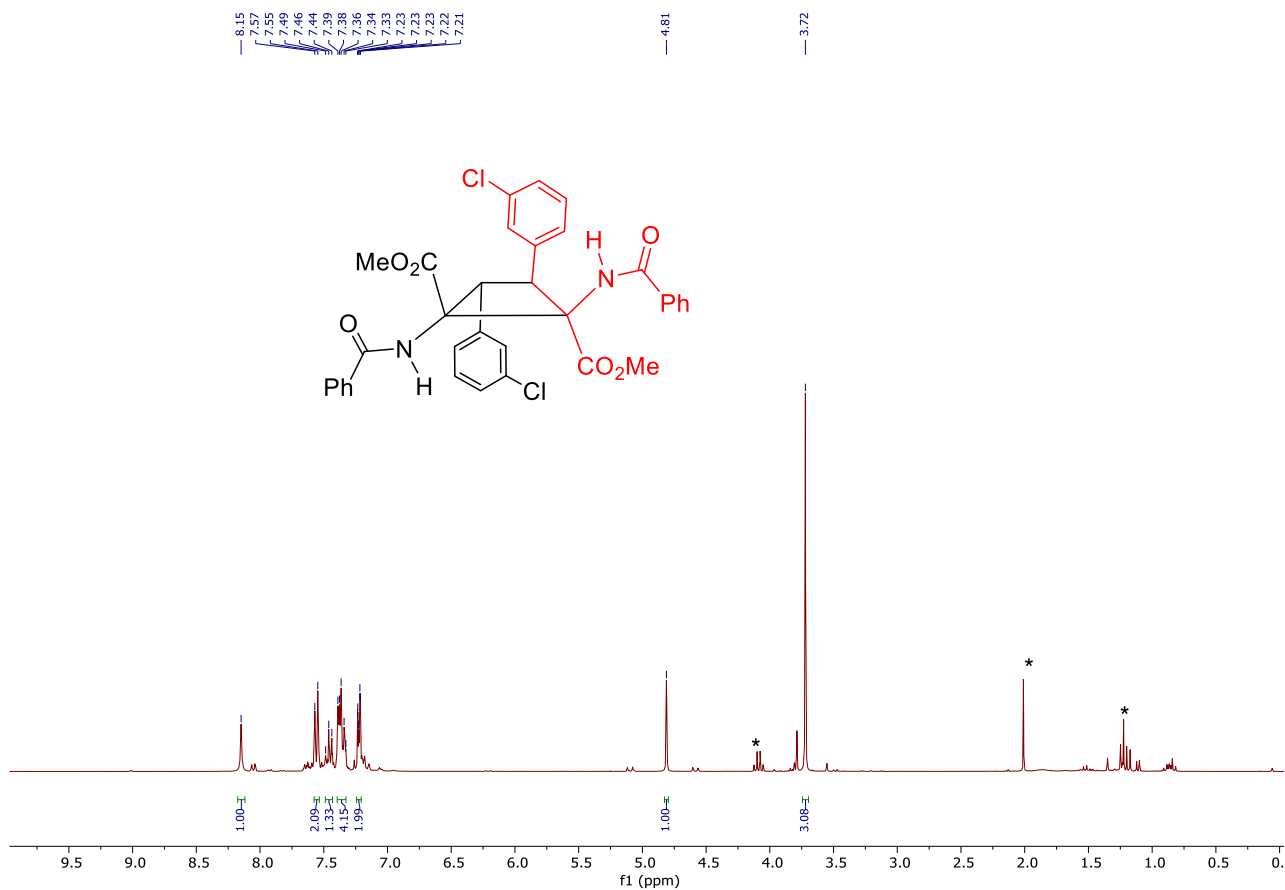

$^1\text{H}$  NMR spectrum ( $\text{CDCl}_3$ , 300.13 MHz) of **2j** (\* = ethyl acetate).

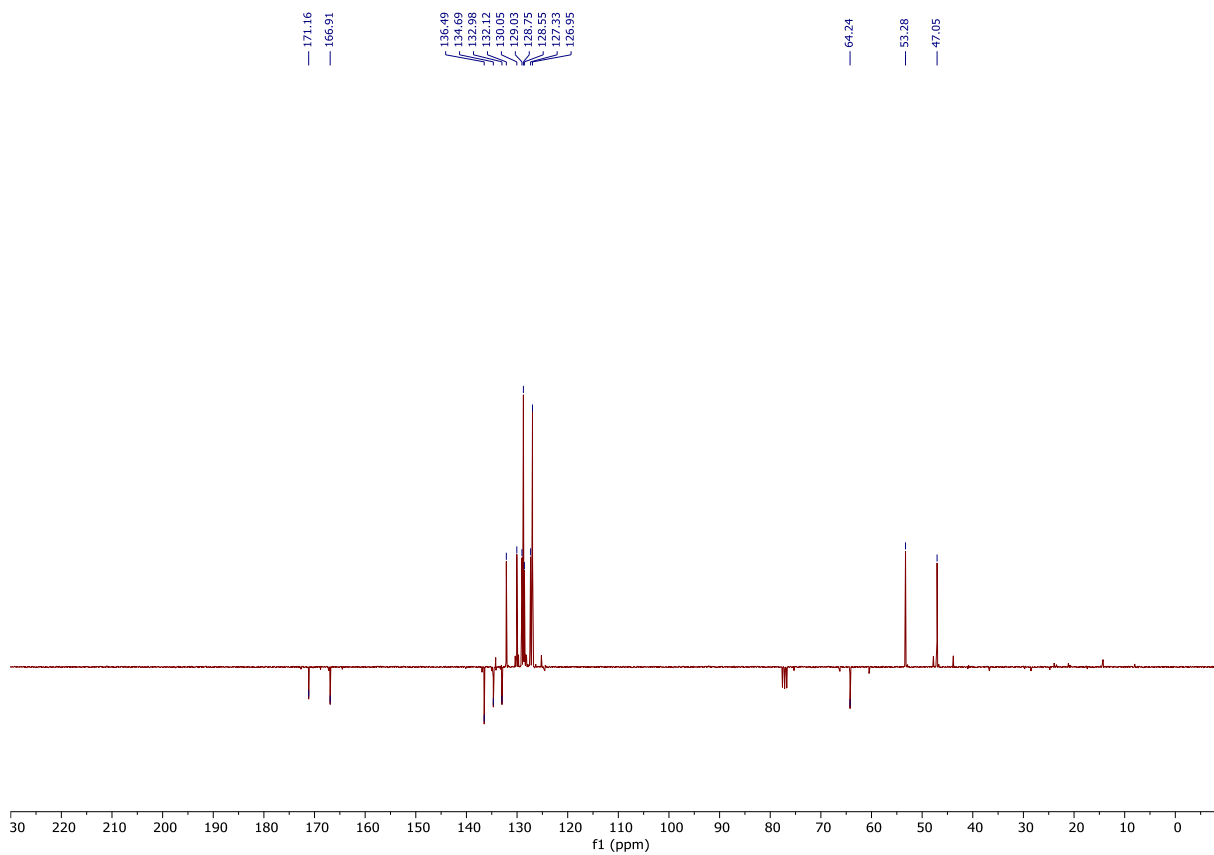

$^{13}\text{C}\{^1\text{H}\}$  (APT) NMR spectrum ( $\text{CDCl}_3$ , 75.5 MHz) of **2j**

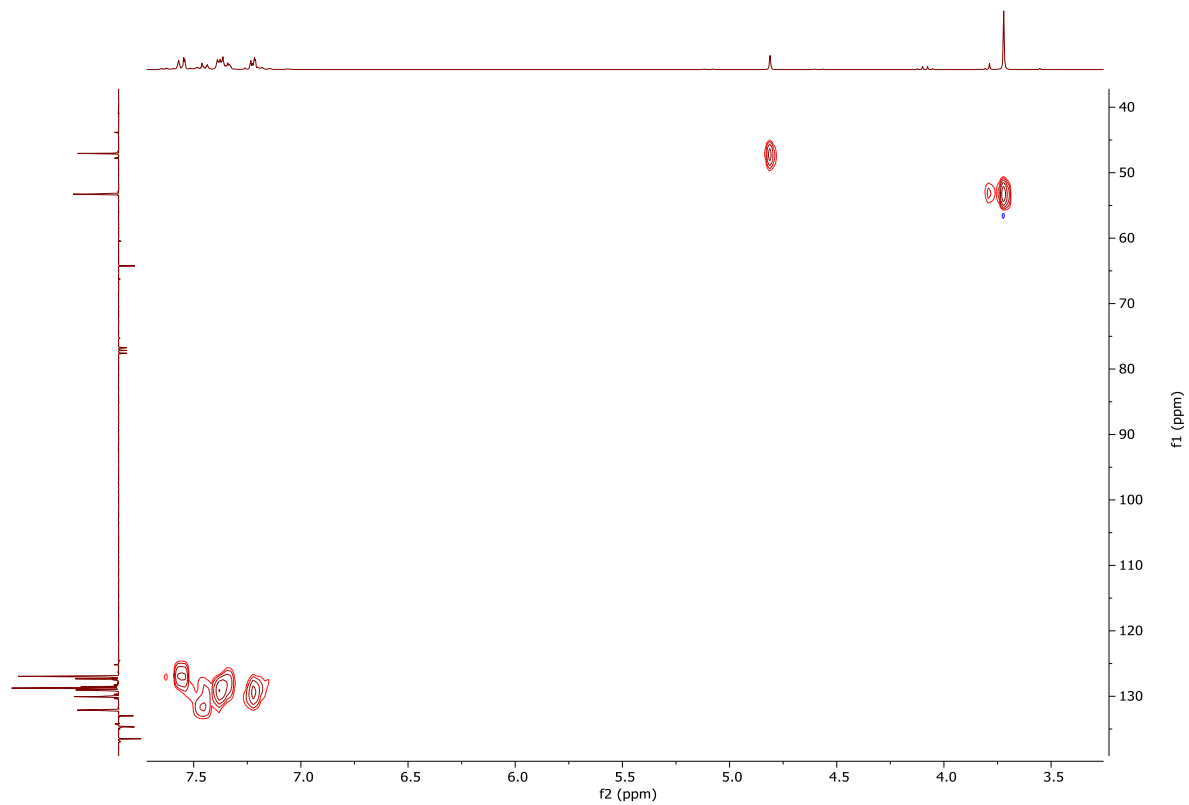

<sup>1</sup>H-<sup>13</sup>C HSQC (CDCl<sub>3</sub>) correlation spectrum of **2j**

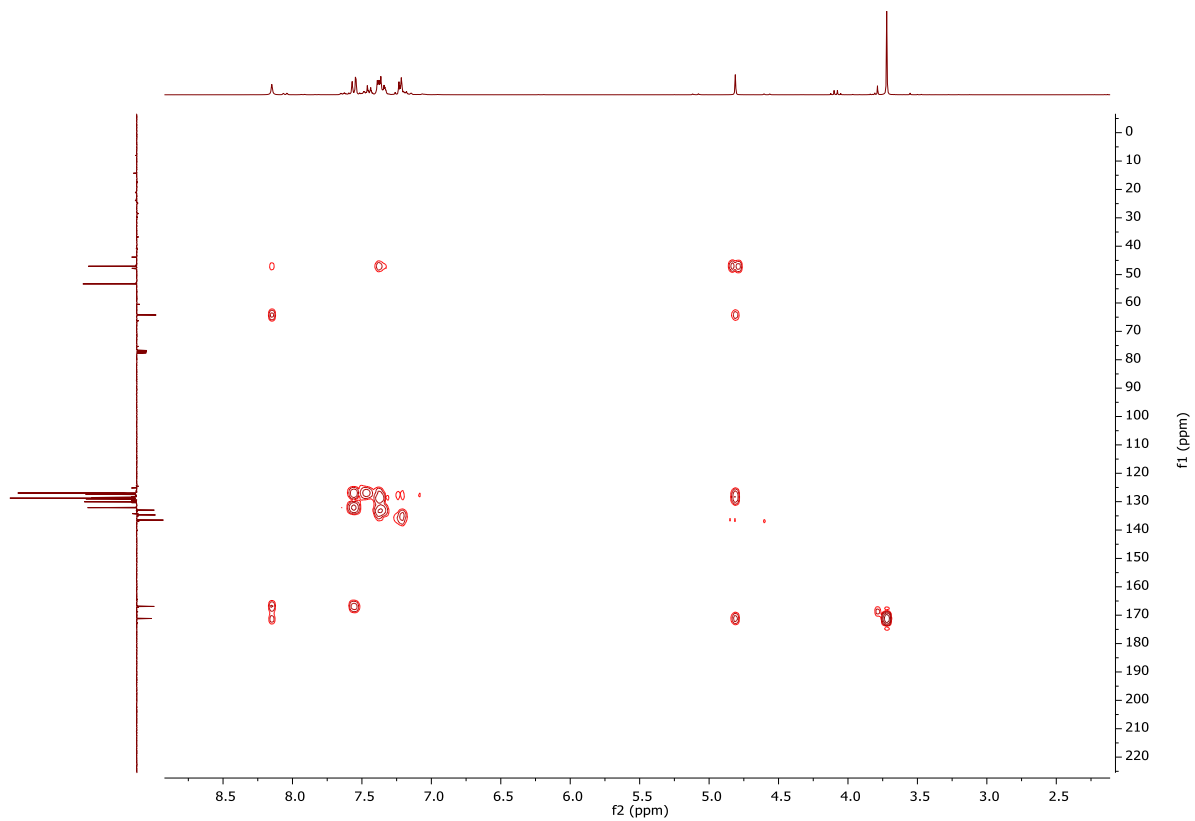

<sup>1</sup>H-<sup>13</sup>C HMBC (CDCl<sub>3</sub>) correlation spectrum of **2j**

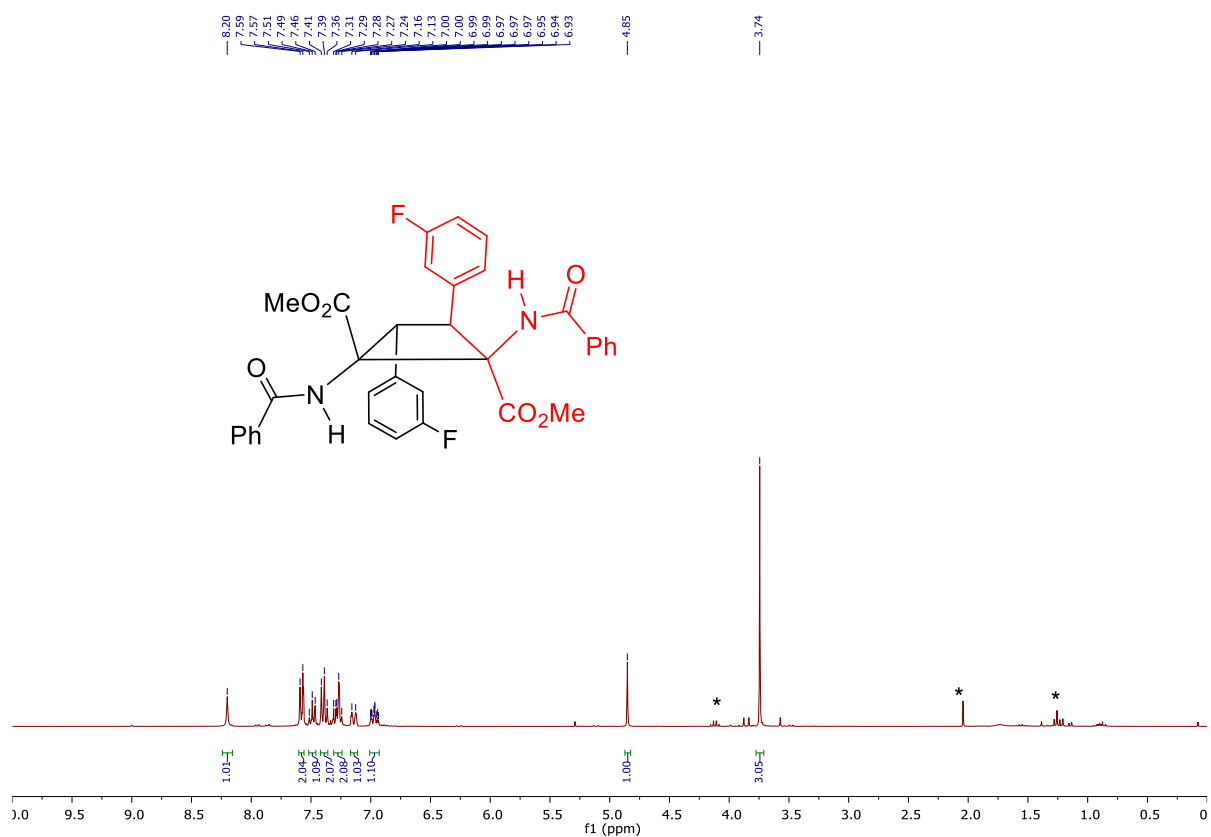

$^1\text{H}$  NMR spectrum ( $\text{CDCl}_3$ , 300.13 MHz) of **2k** (\* = ethyl acetate)

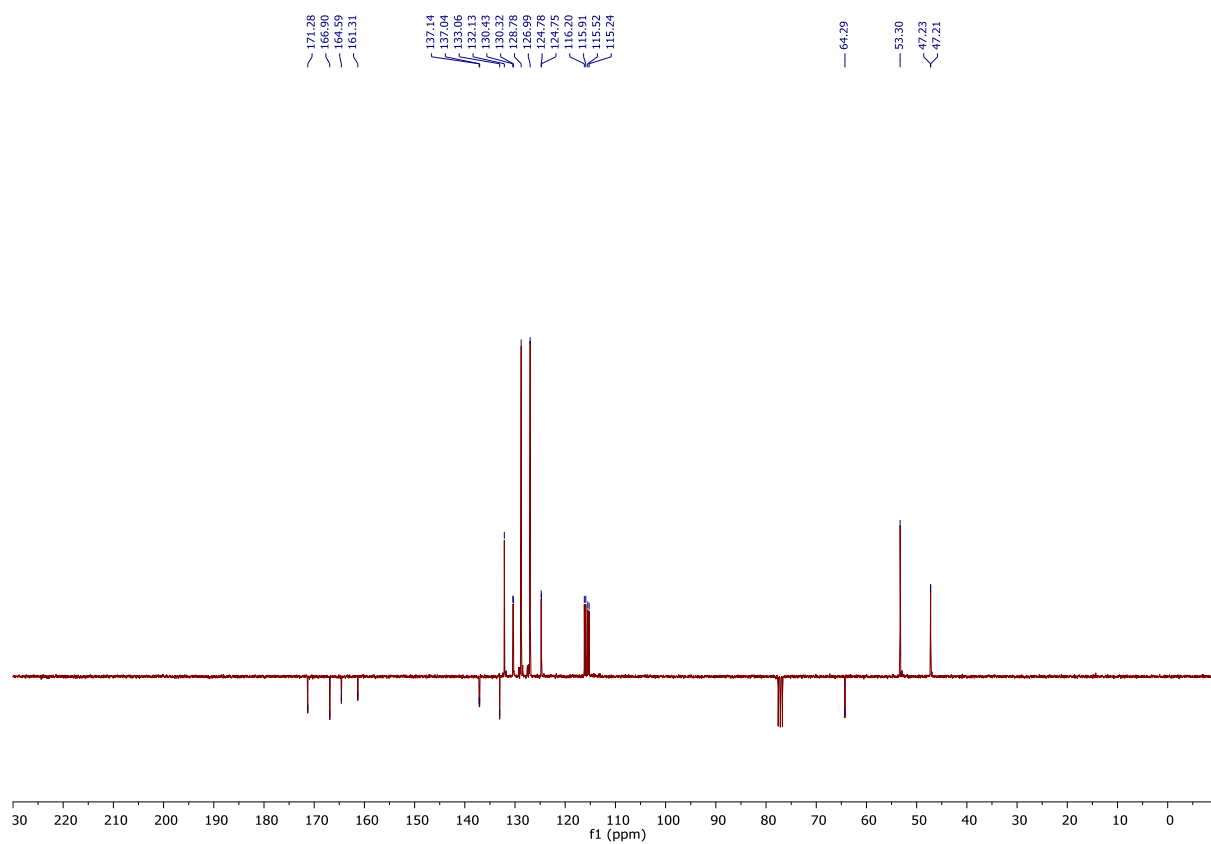

$^{13}\text{C}\{^1\text{H}\}$  (APT) NMR spectrum ( $\text{CDCl}_3$ , 75.5 MHz) of **2k**

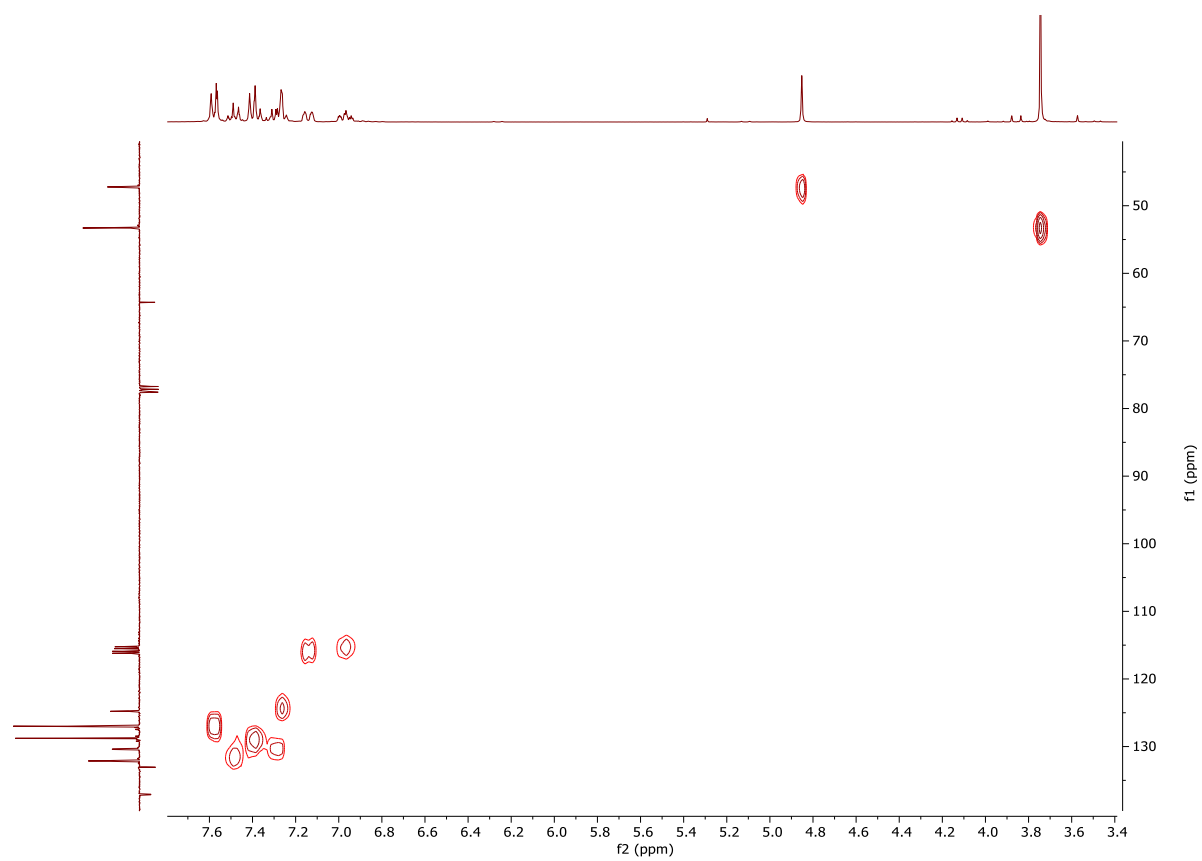

$^1\text{H}$ - $^{13}\text{C}$  HSQC ( $\text{CDCl}_3$ ) correlation spectrum of **2k**

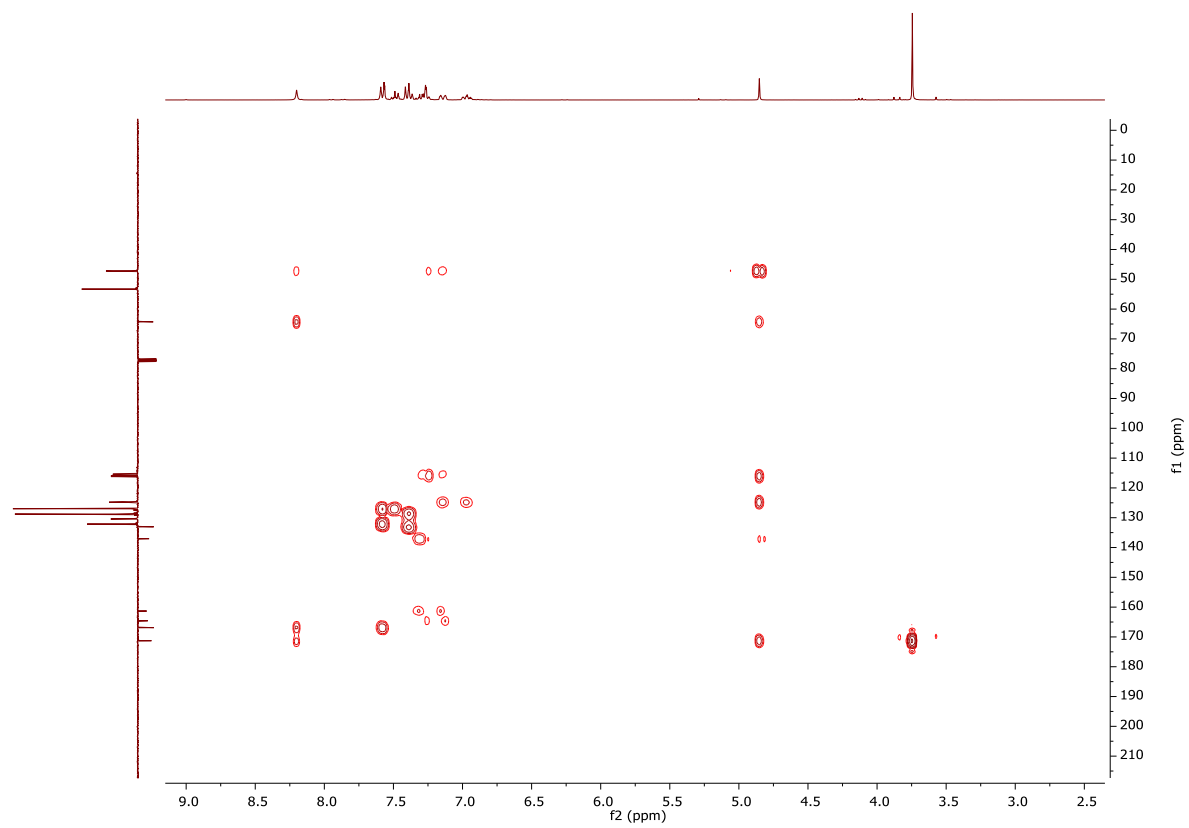

$^1\text{H}$ - $^{13}\text{C}$  HMBC ( $\text{CDCl}_3$ ) correlation spectrum of **2k**



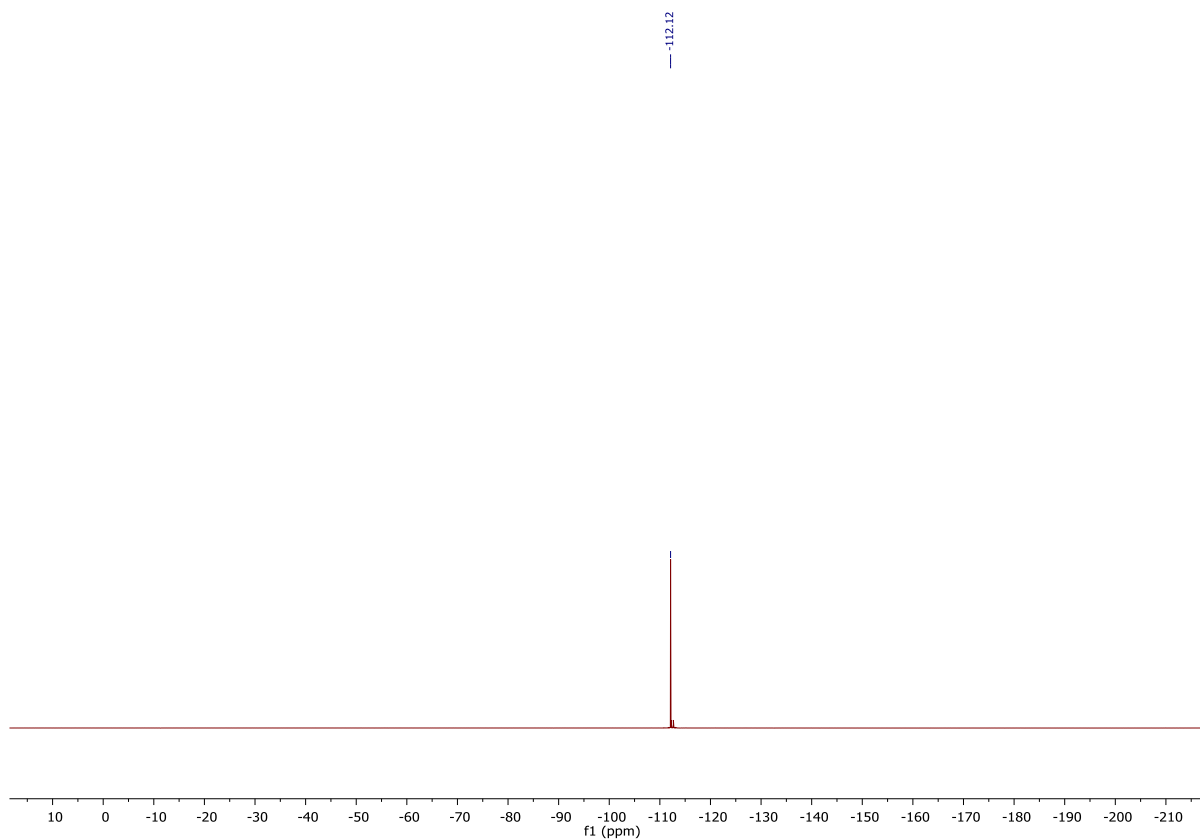

$^{19}\text{F}$   $\{^1\text{H}\}$  NMR spectrum ( $\text{CDCl}_3$ , 282.40 MHz) of **2k**

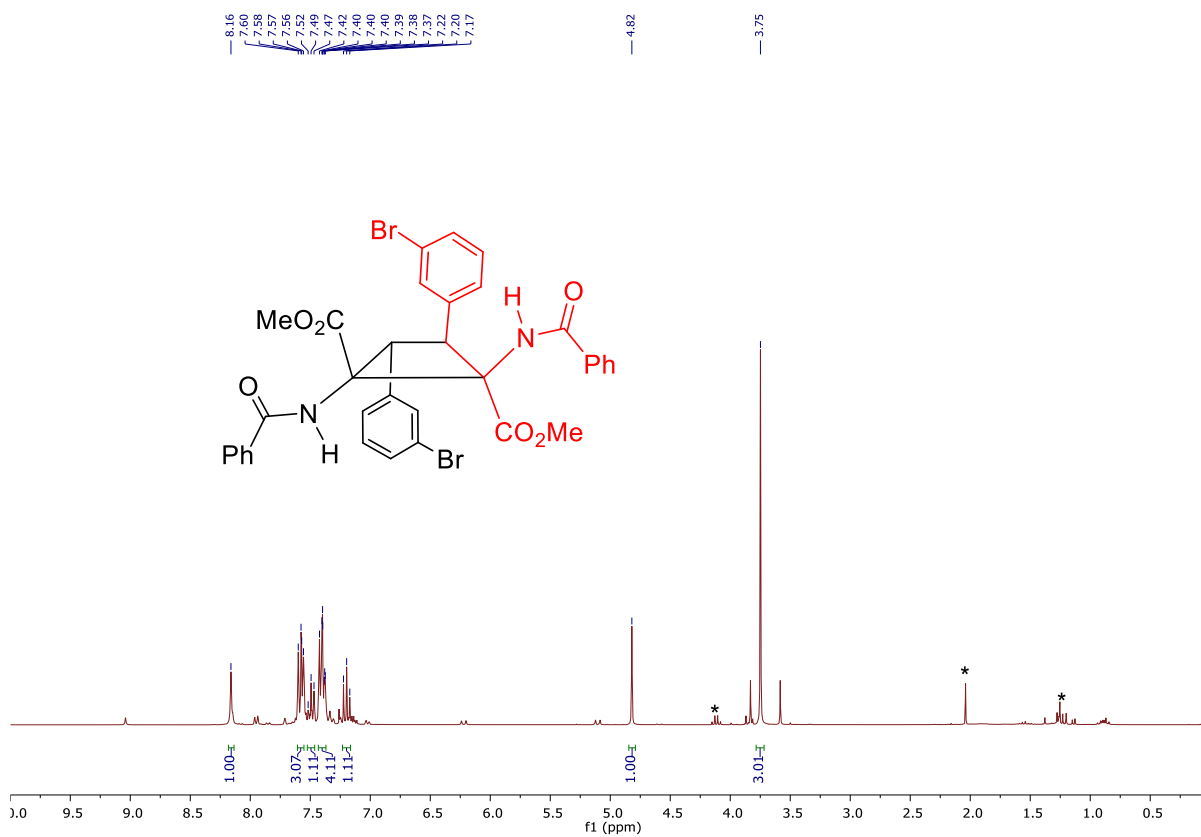

$^1\text{H}$  NMR spectrum ( $\text{CDCl}_3$ , 300.13 MHz) of **2l** (\* = ethyl acetate)

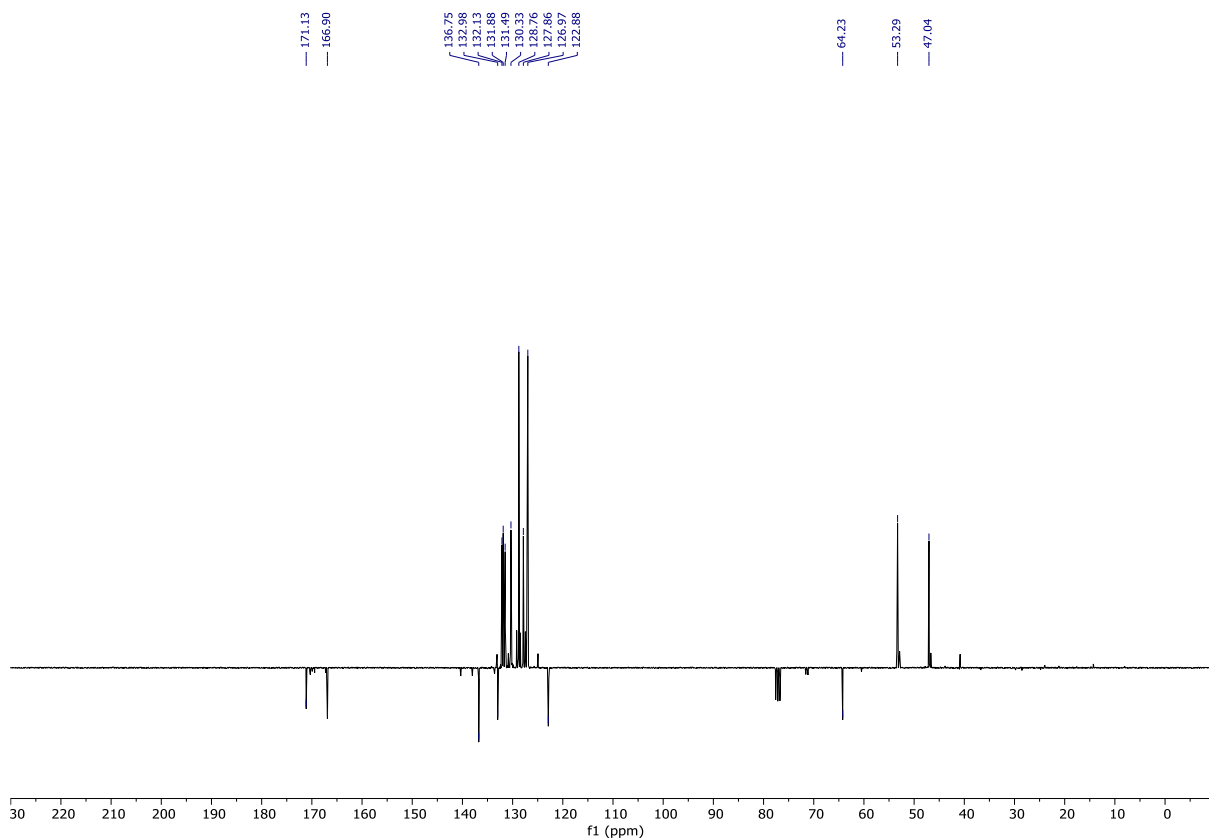

$^{13}\text{C}\{^1\text{H}\}$  (APT) NMR spectrum ( $\text{CDCl}_3$ , 75.5 MHz) of **21**

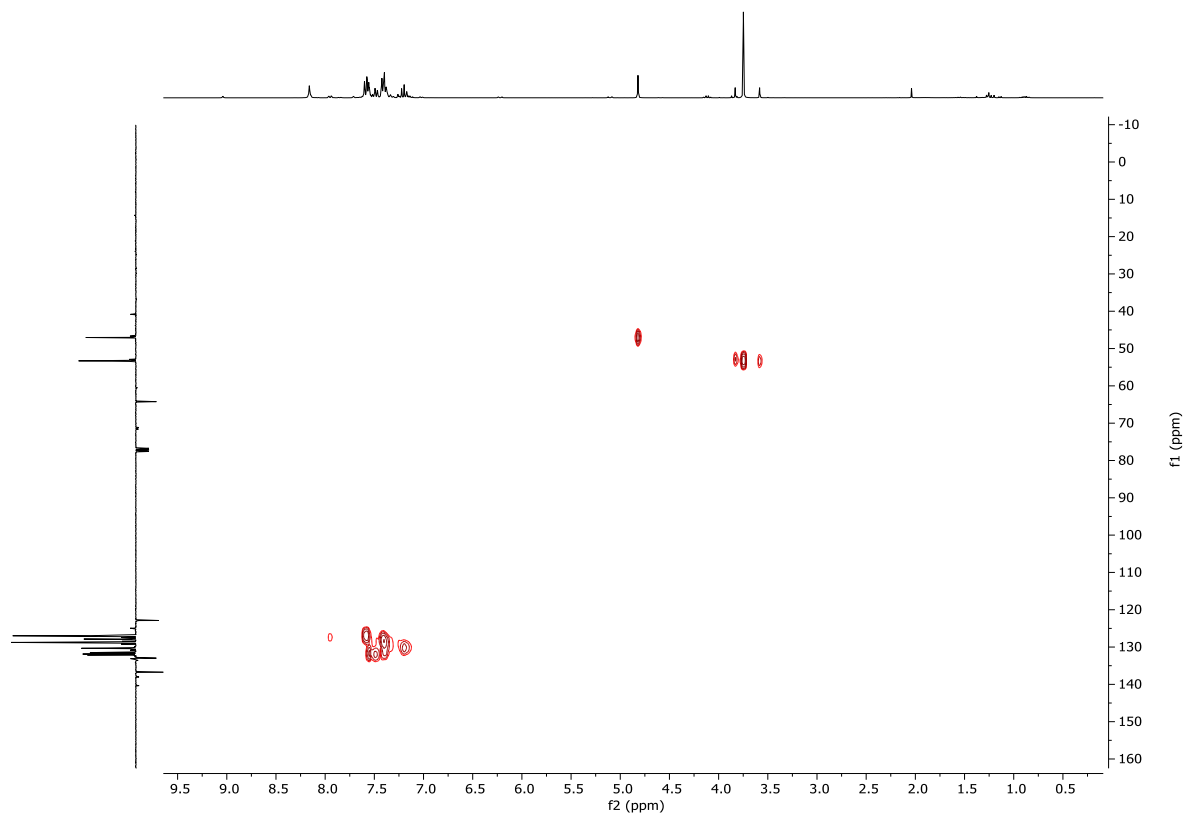

$^1\text{H}$ - $^{13}\text{C}$  HSQC ( $\text{CDCl}_3$ ) correlation spectrum of **21**

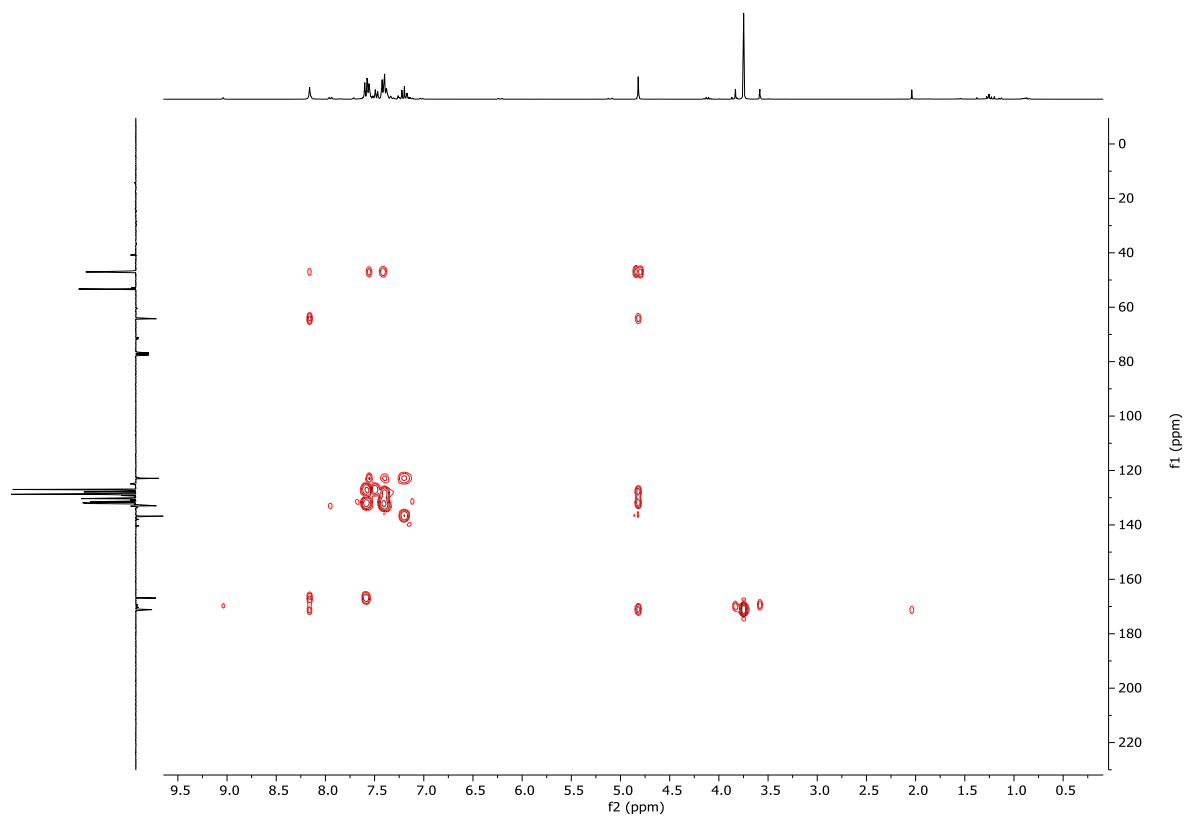

$^1\text{H}$ - $^{13}\text{C}$  HMBC ( $\text{CDCl}_3$ ) correlation spectrum of **2l**

8.09  
7.70  
7.68  
7.56  
7.53  
7.49  
7.46  
7.41  
7.38  
7.36

4.96

3.77

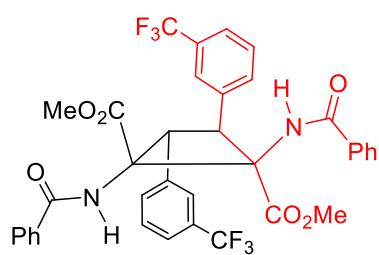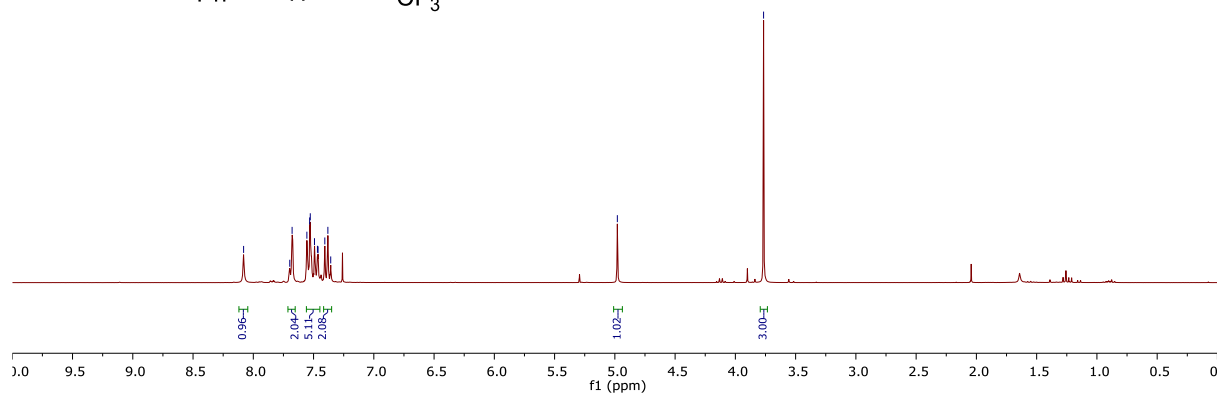

$^1\text{H}$  NMR spectrum ( $\text{CDCl}_3$ , 300.13 MHz) of **2m**

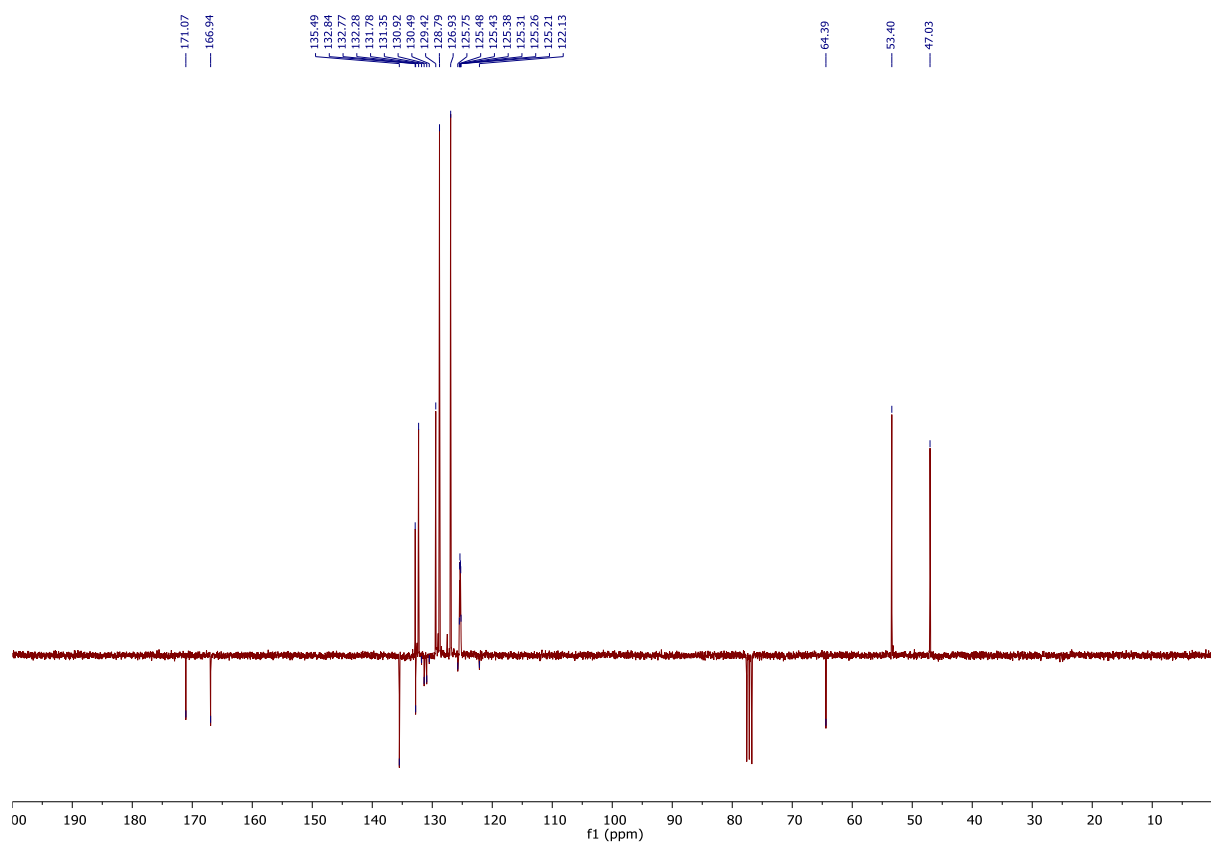

$^{13}\text{C}\{^1\text{H}\}$  (APT) NMR spectrum ( $\text{CDCl}_3$ , 75.5 MHz) of **2m**

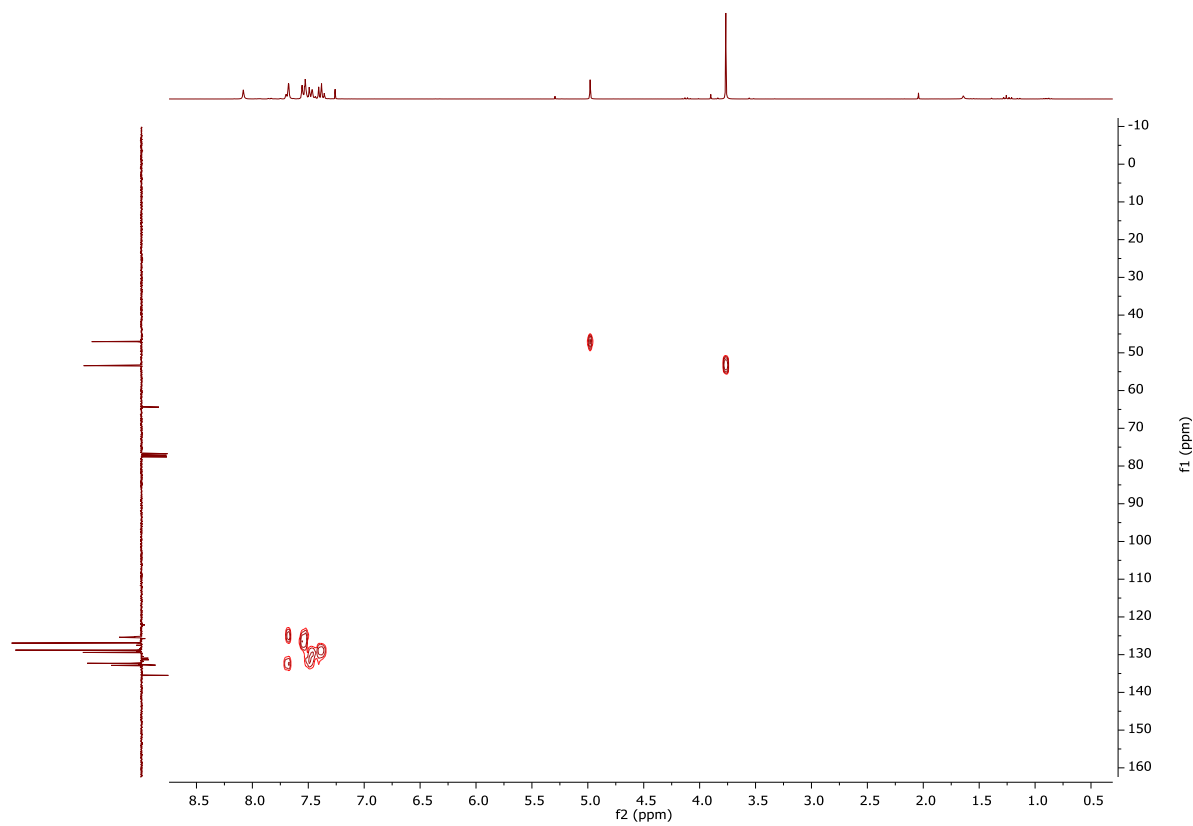

$^1\text{H}$ - $^{13}\text{C}$  HSQC ( $\text{CDCl}_3$ ) correlation spectrum of **2m**

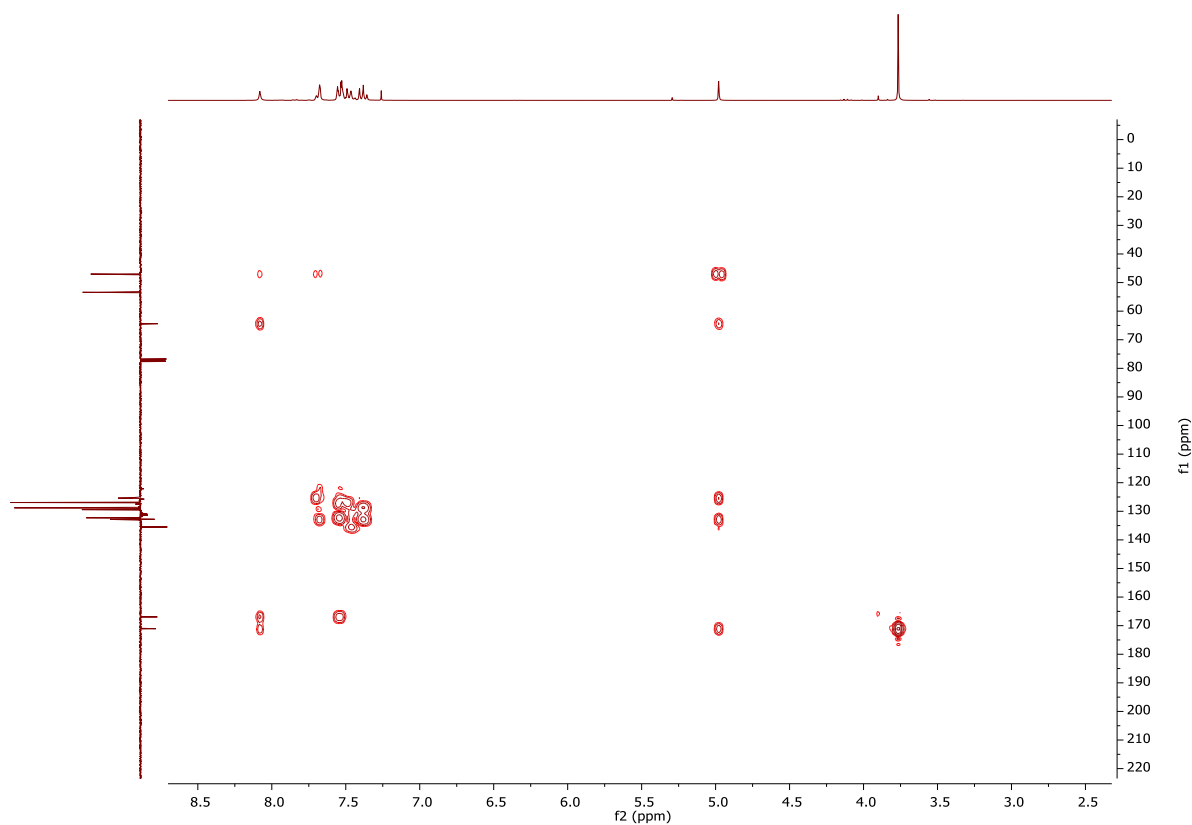

$^1\text{H}$ - $^{13}\text{C}$  HMBC ( $\text{CDCl}_3$ ) correlation spectrum of **2m**

-62.72

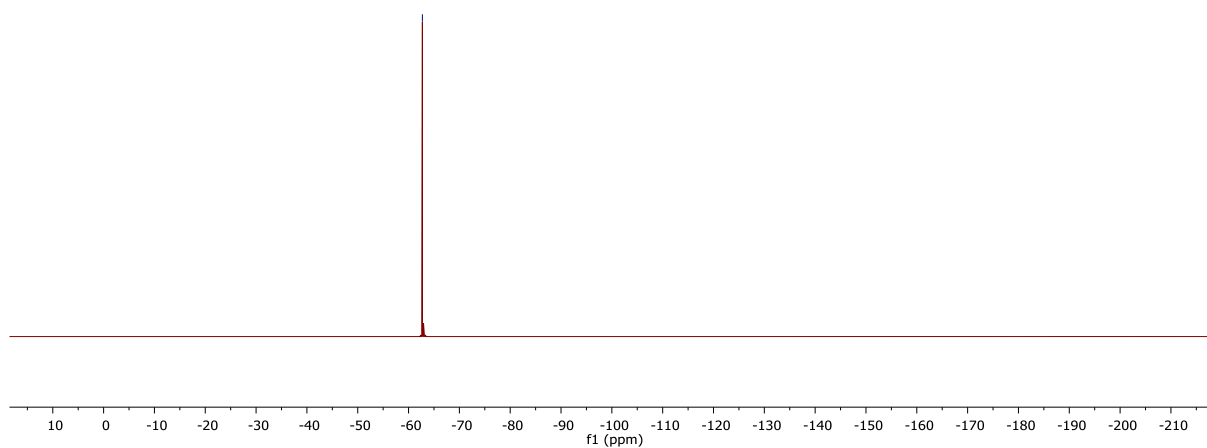

$^{19}\text{F}$  NMR spectrum ( $\text{CDCl}_3$ , 282.40 MHz) of **2m**

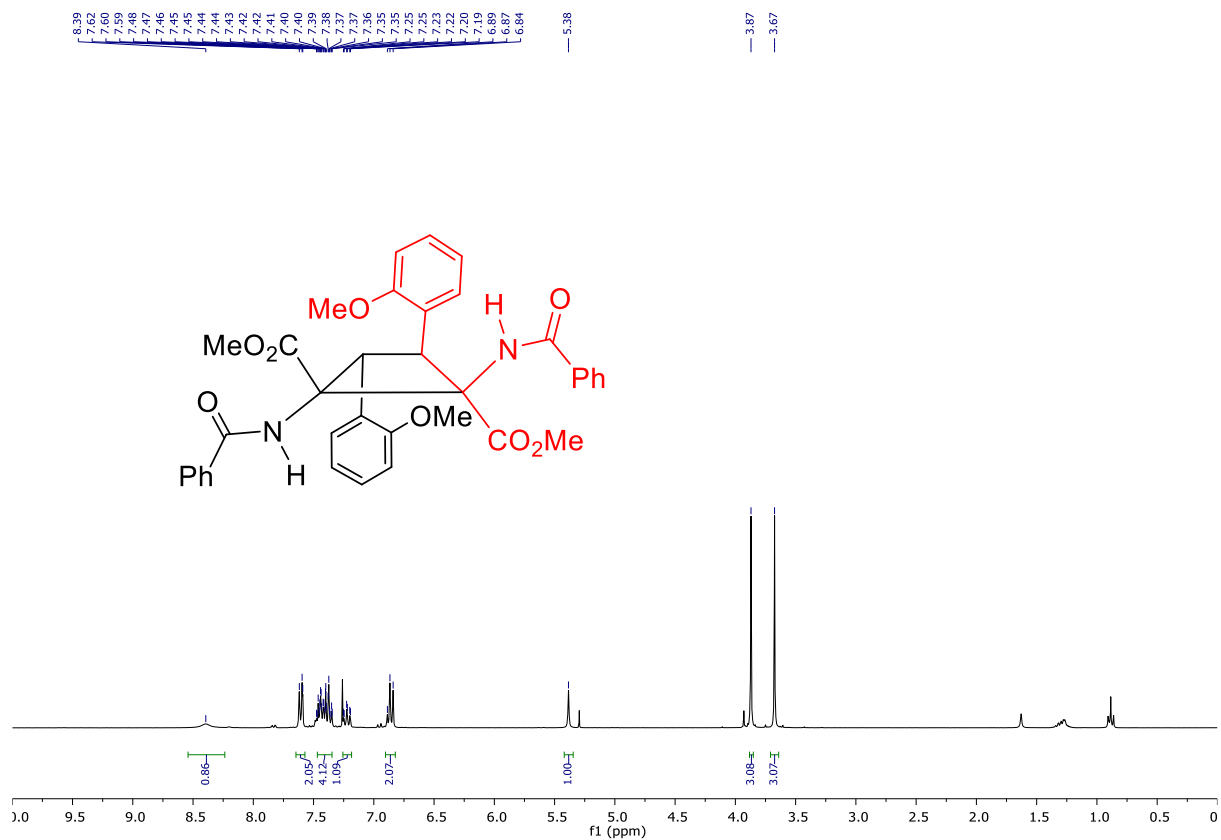

<sup>1</sup>H NMR spectrum (CDCl<sub>3</sub>, 300.13 MHz) of **2n**

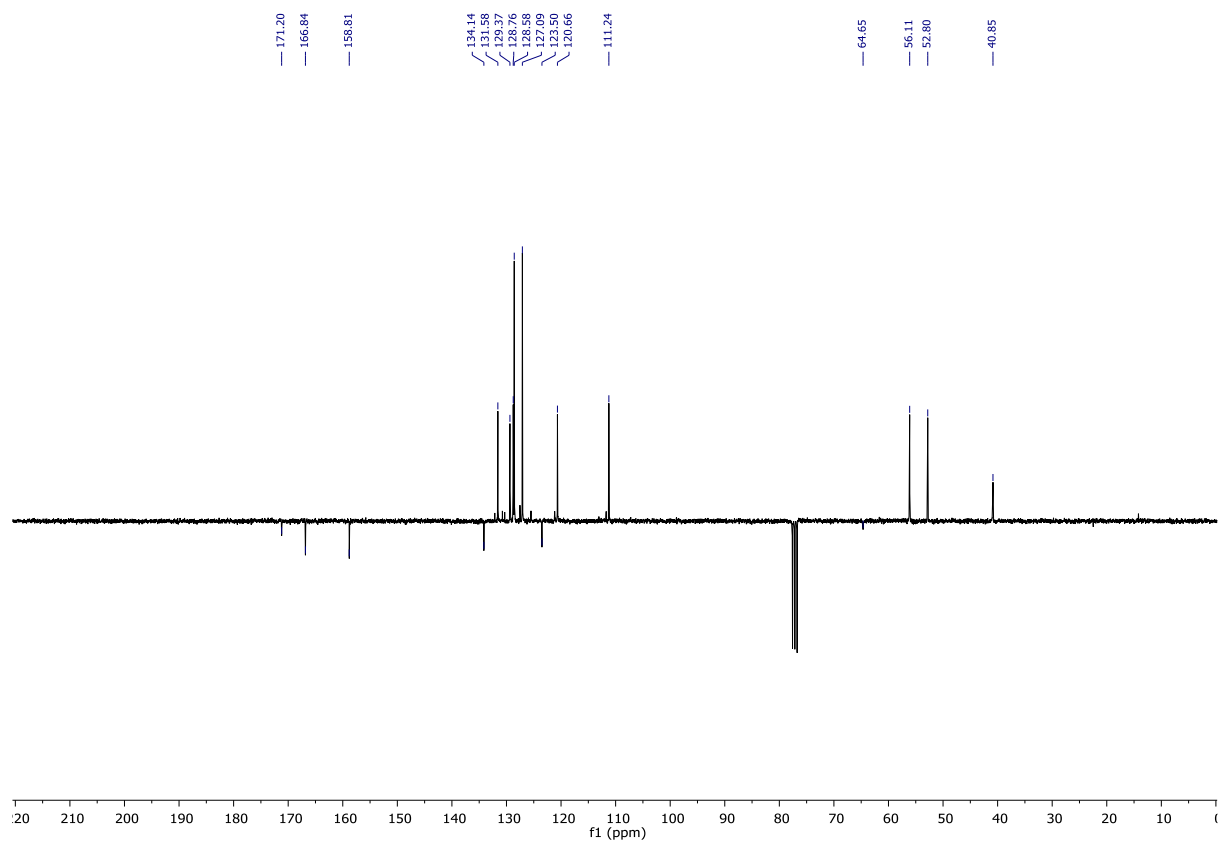

<sup>13</sup>C{<sup>1</sup>H} (APT) NMR spectrum (CDCl<sub>3</sub>, 75.5 MHz) of **2n**

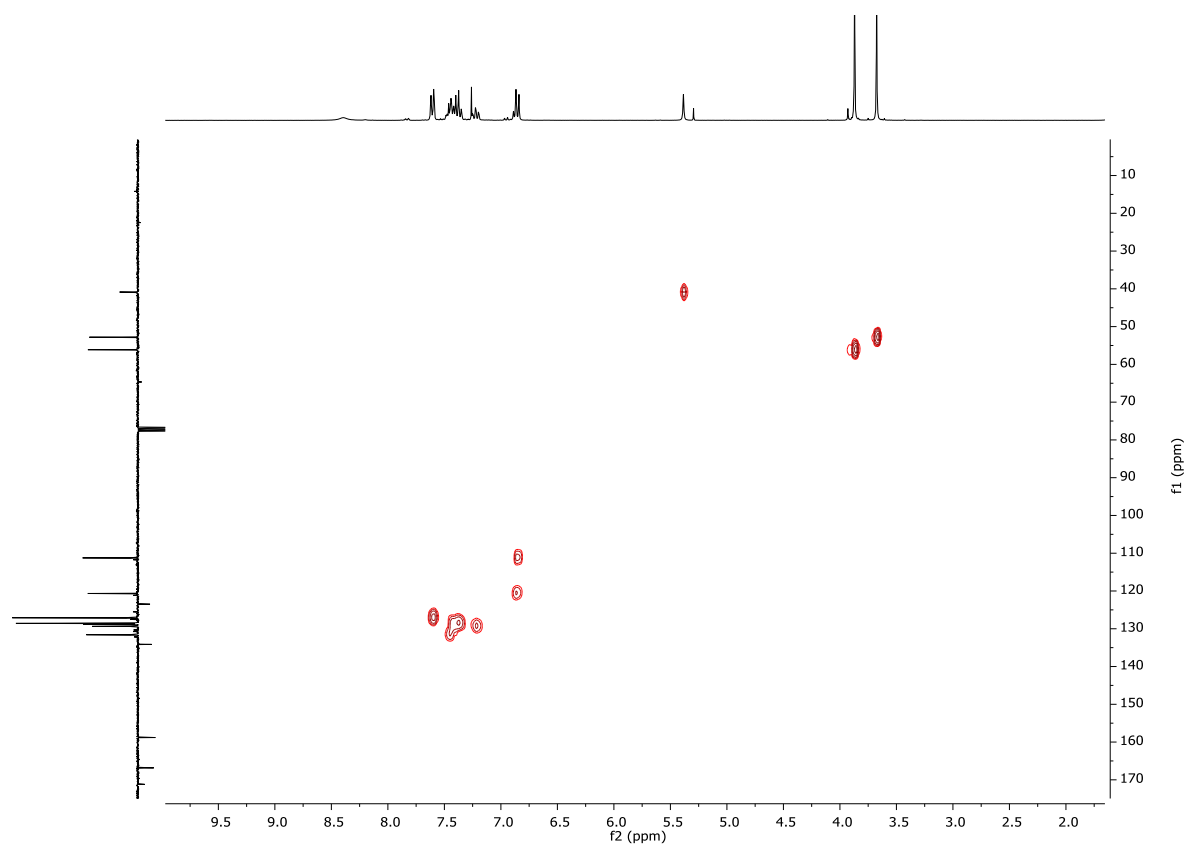

$^1\text{H}$ - $^{13}\text{C}$  HSQC ( $\text{CDCl}_3$ ) correlation spectrum of **2n**

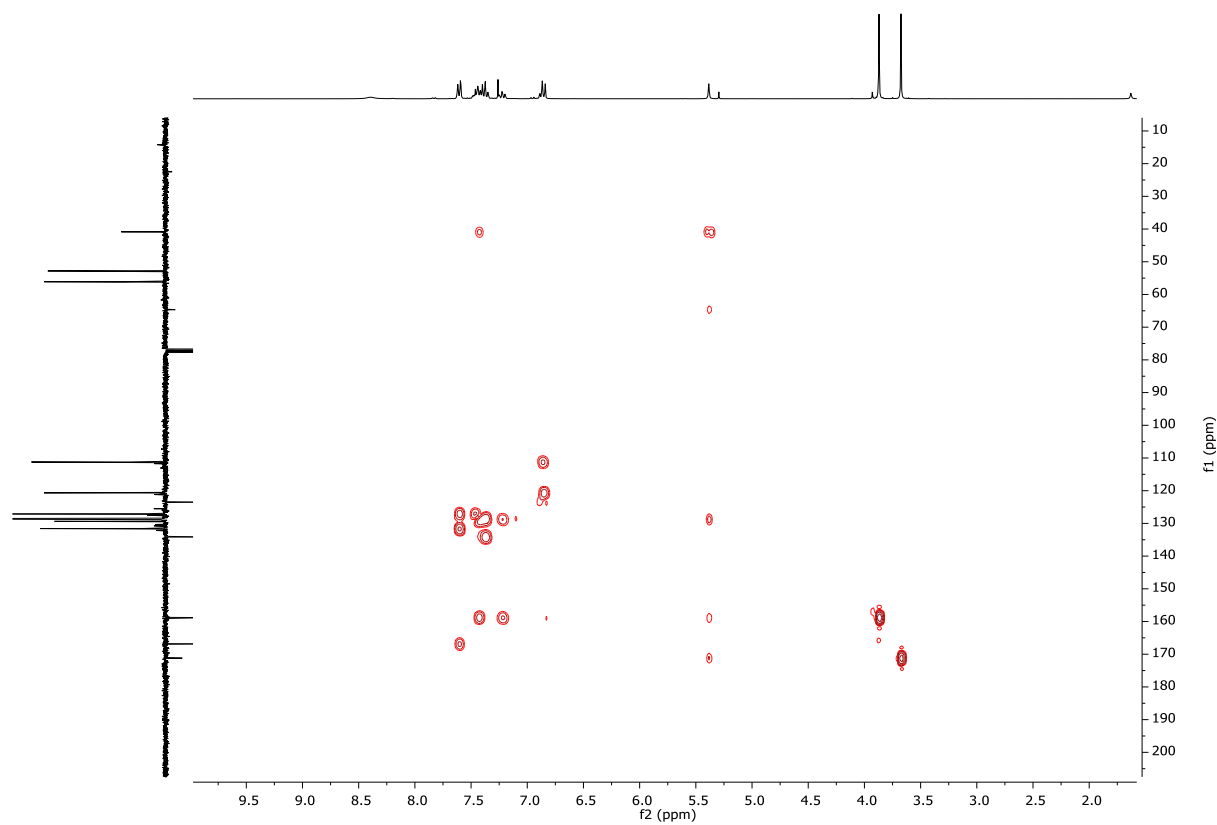

$^1\text{H}$ - $^{13}\text{C}$  HMBC ( $\text{CDCl}_3$ ) correlation spectrum of **2n**

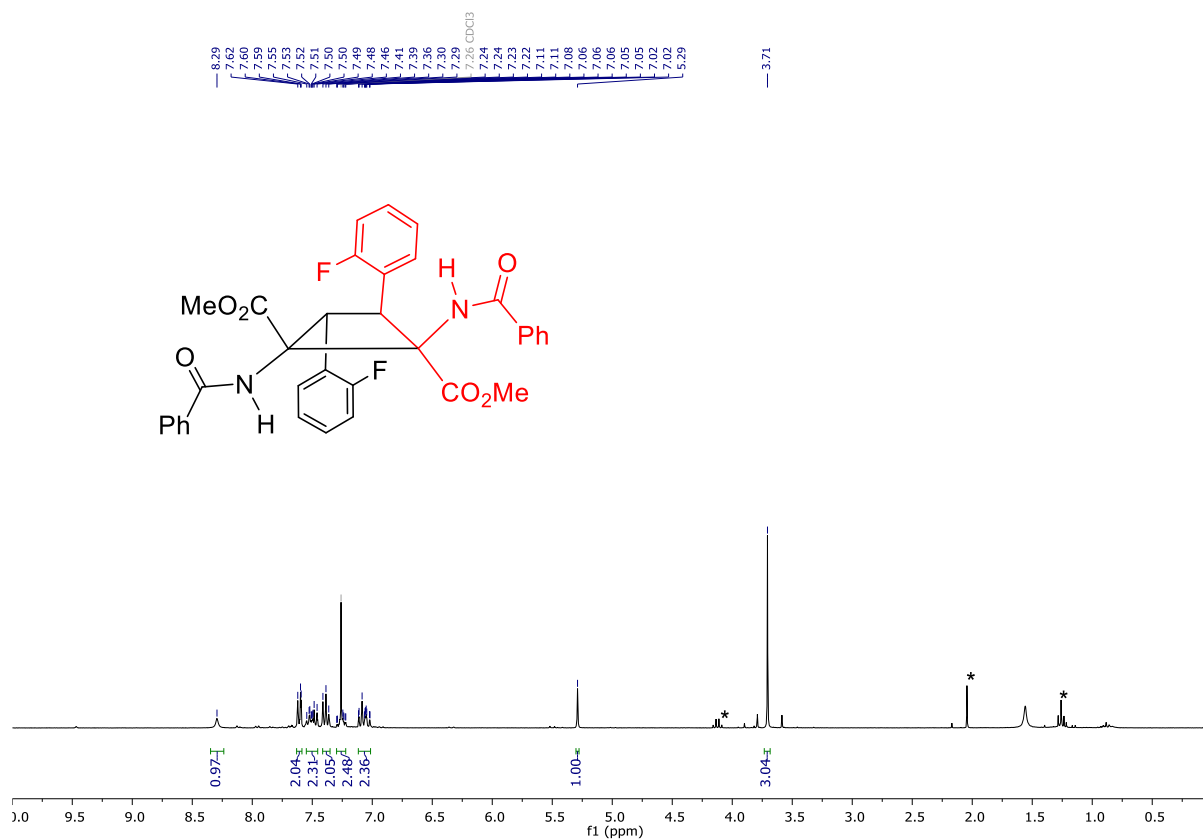

<sup>1</sup>H NMR spectrum (CDCl<sub>3</sub>, 300.13 MHz) of **2o** (\* = ethyl acetate)

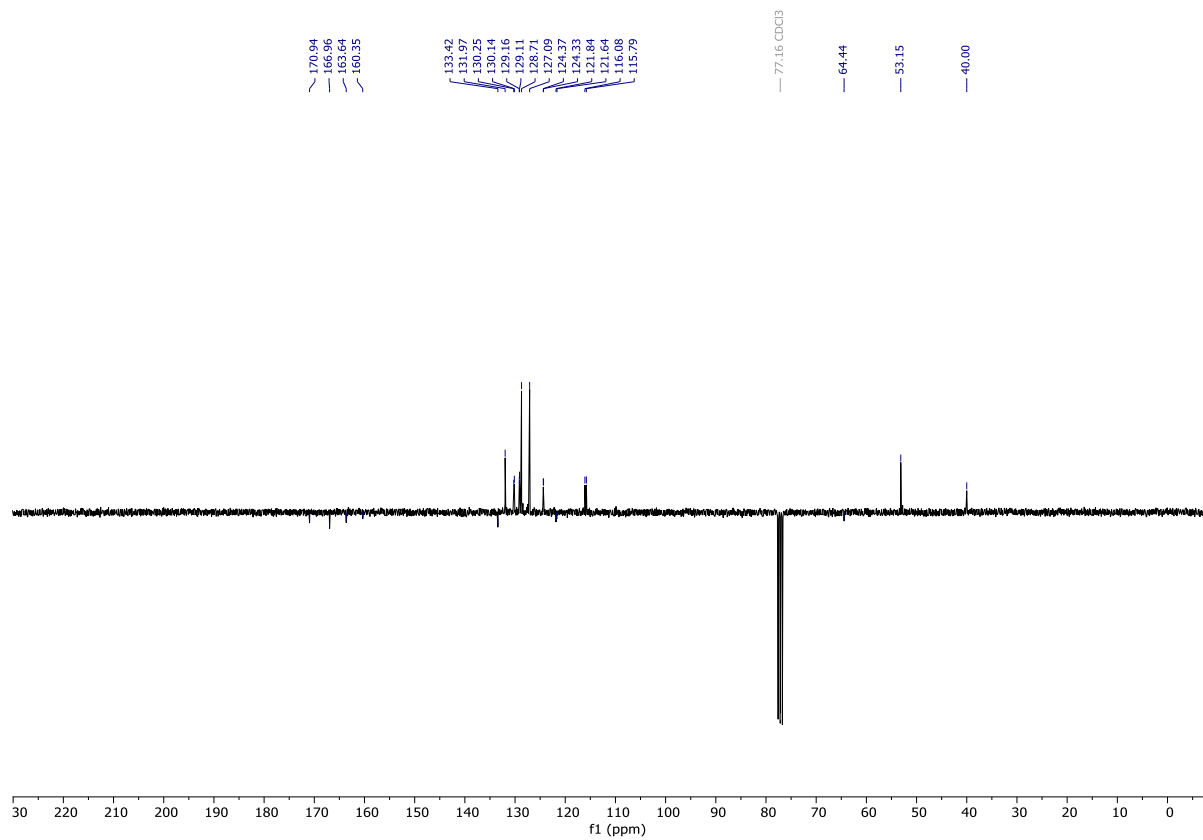

<sup>13</sup>C{<sup>1</sup>H} (APT) NMR spectrum (CDCl<sub>3</sub>, 75.5 MHz) of **2o**



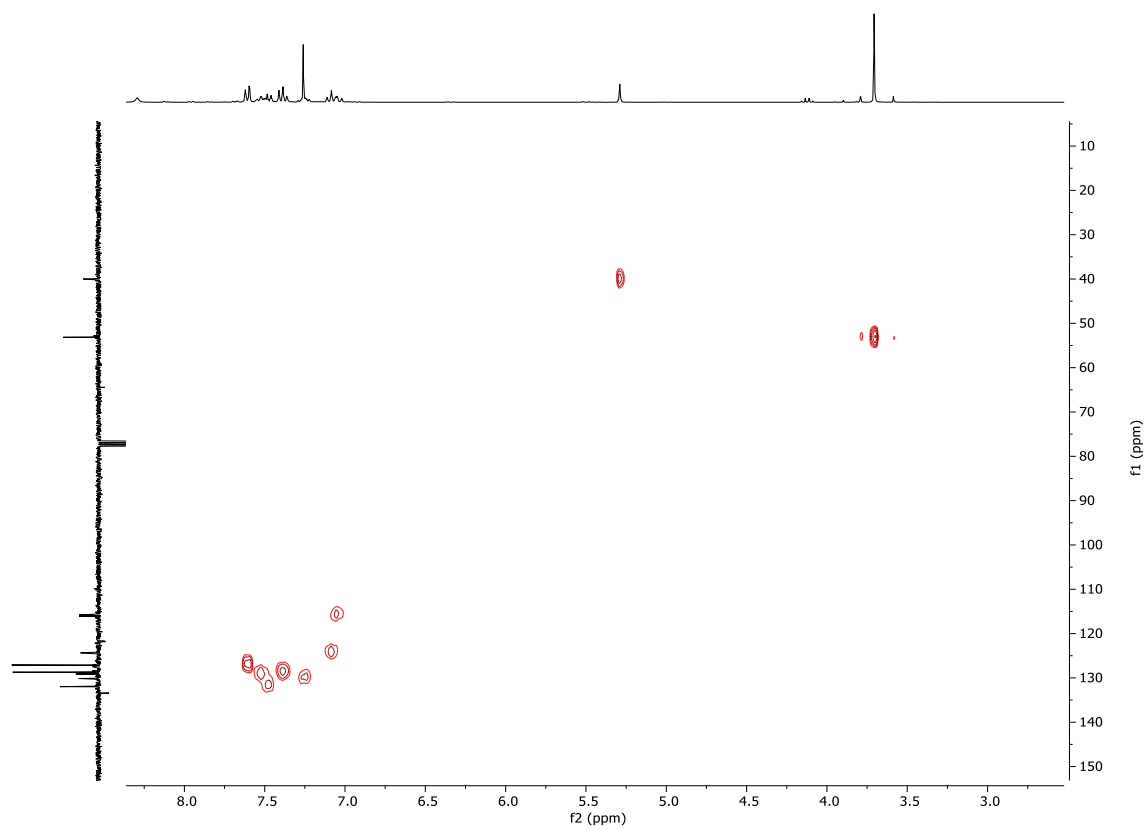

$^1\text{H}$ - $^{13}\text{C}$  HSQC ( $\text{CDCl}_3$ ) correlation spectrum of **2o**

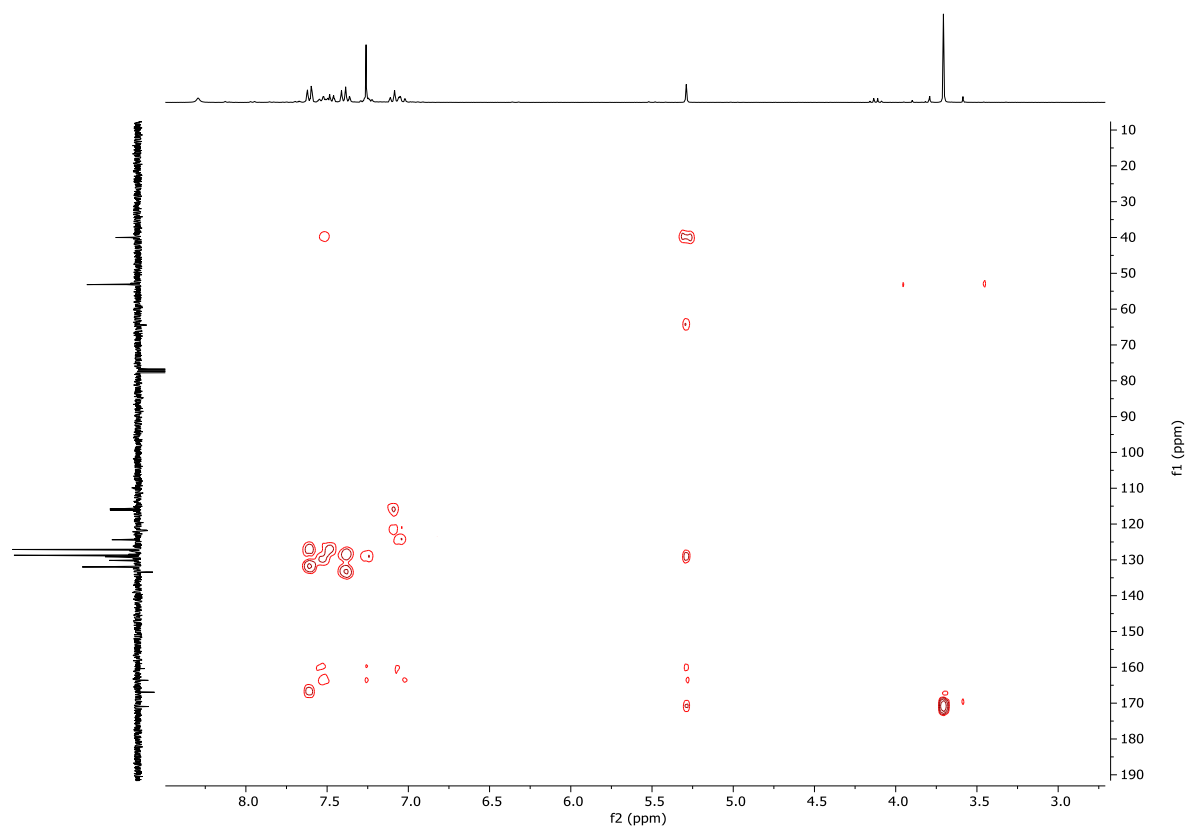

$^1\text{H}$ - $^{13}\text{C}$  HMBC ( $\text{CDCl}_3$ ) correlation spectrum of **2o**

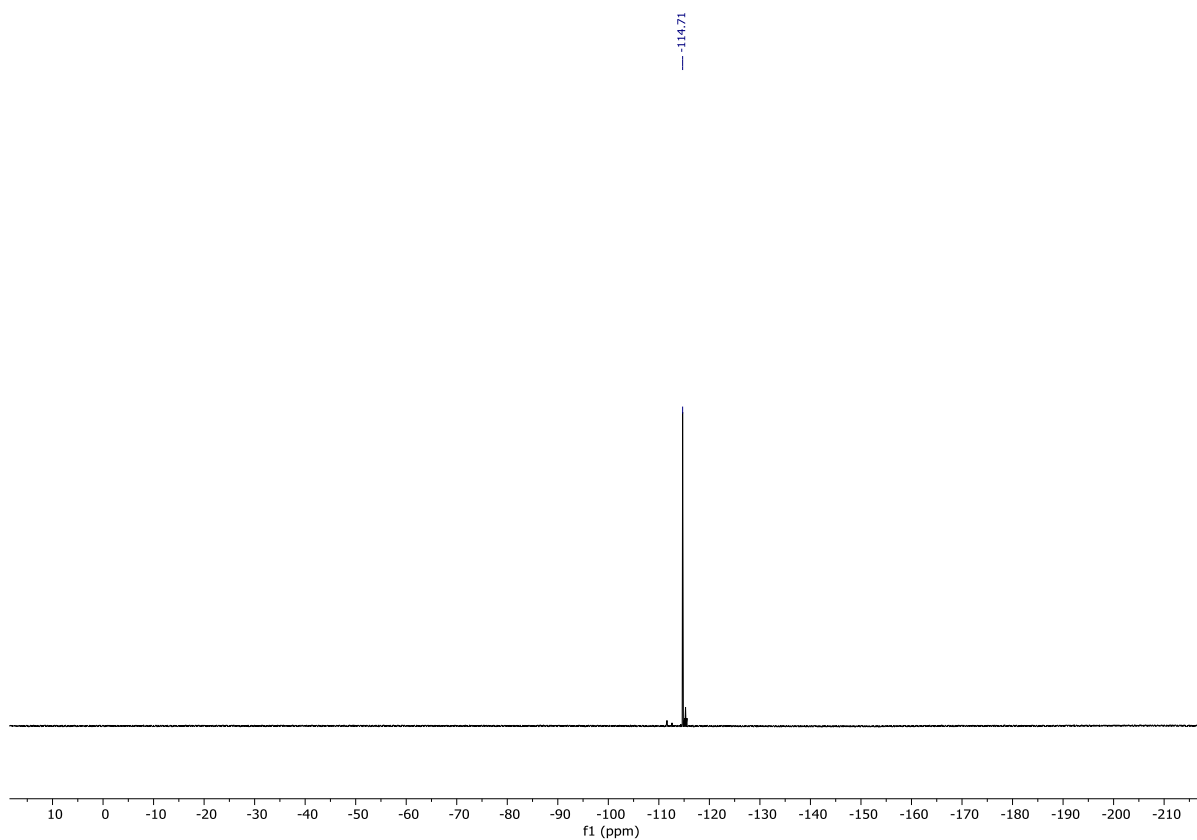

<sup>19</sup>F {<sup>1</sup>H} NMR spectrum (CDCl<sub>3</sub>, 282.40 MHz) of **2o**

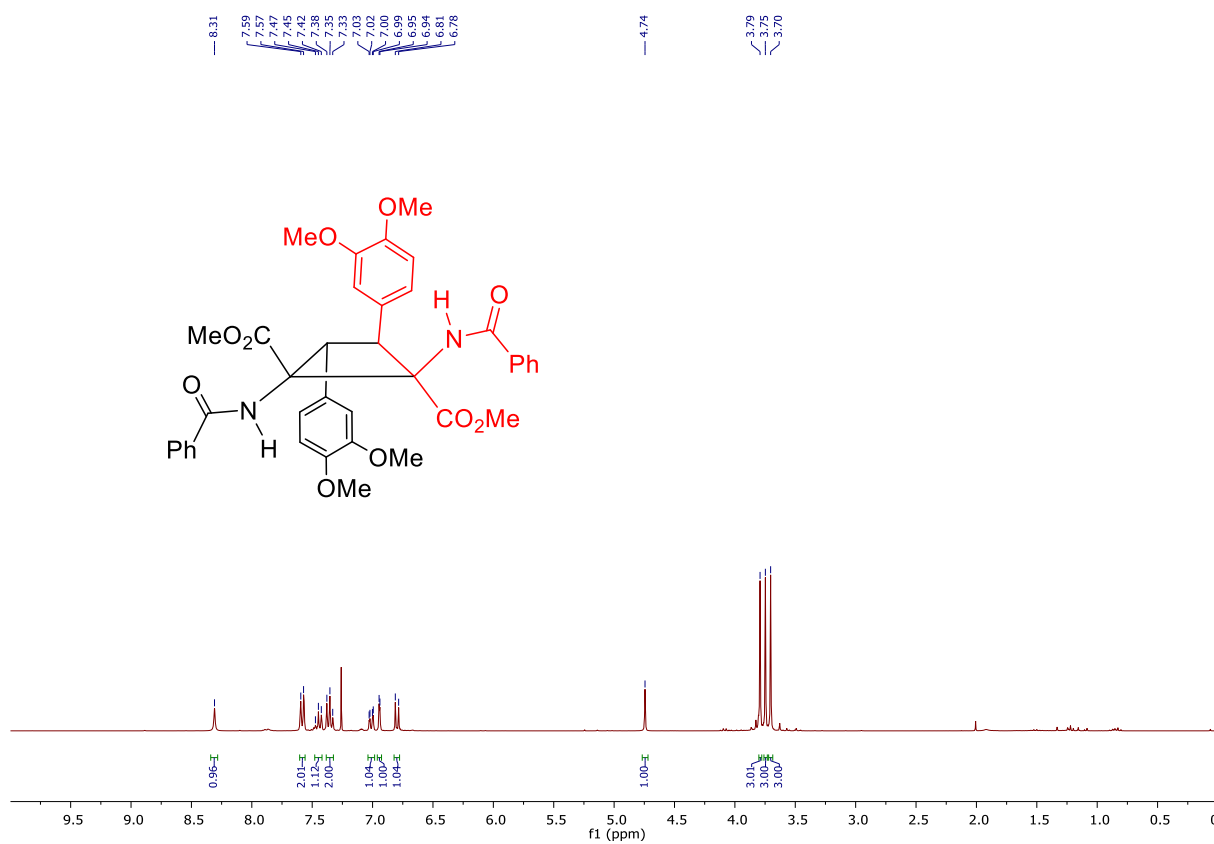

<sup>1</sup>H NMR spectrum (CDCl<sub>3</sub>, 300.13 MHz) of **2p**

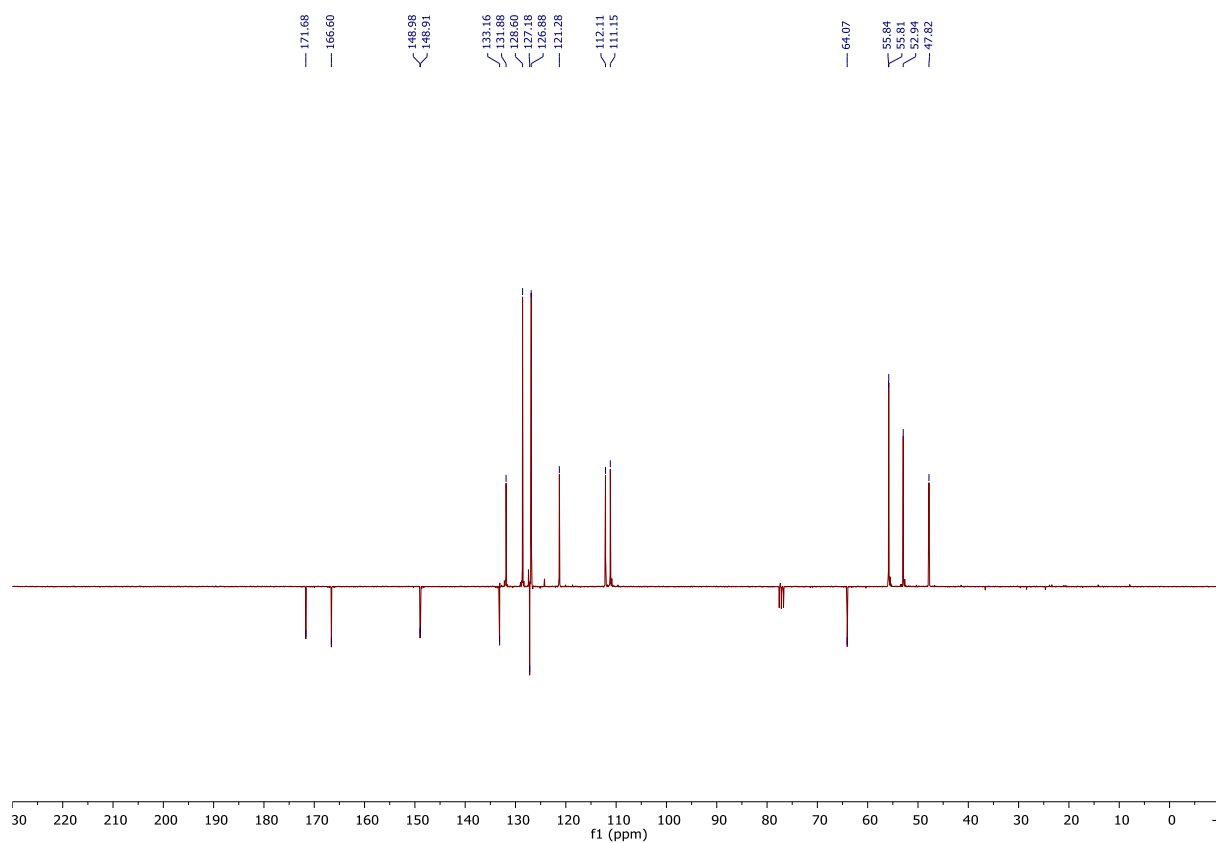

$^{13}\text{C}\{^1\text{H}\}$  (APT) NMR spectrum ( $\text{CDCl}_3$ , 75.5 MHz) of **2p**

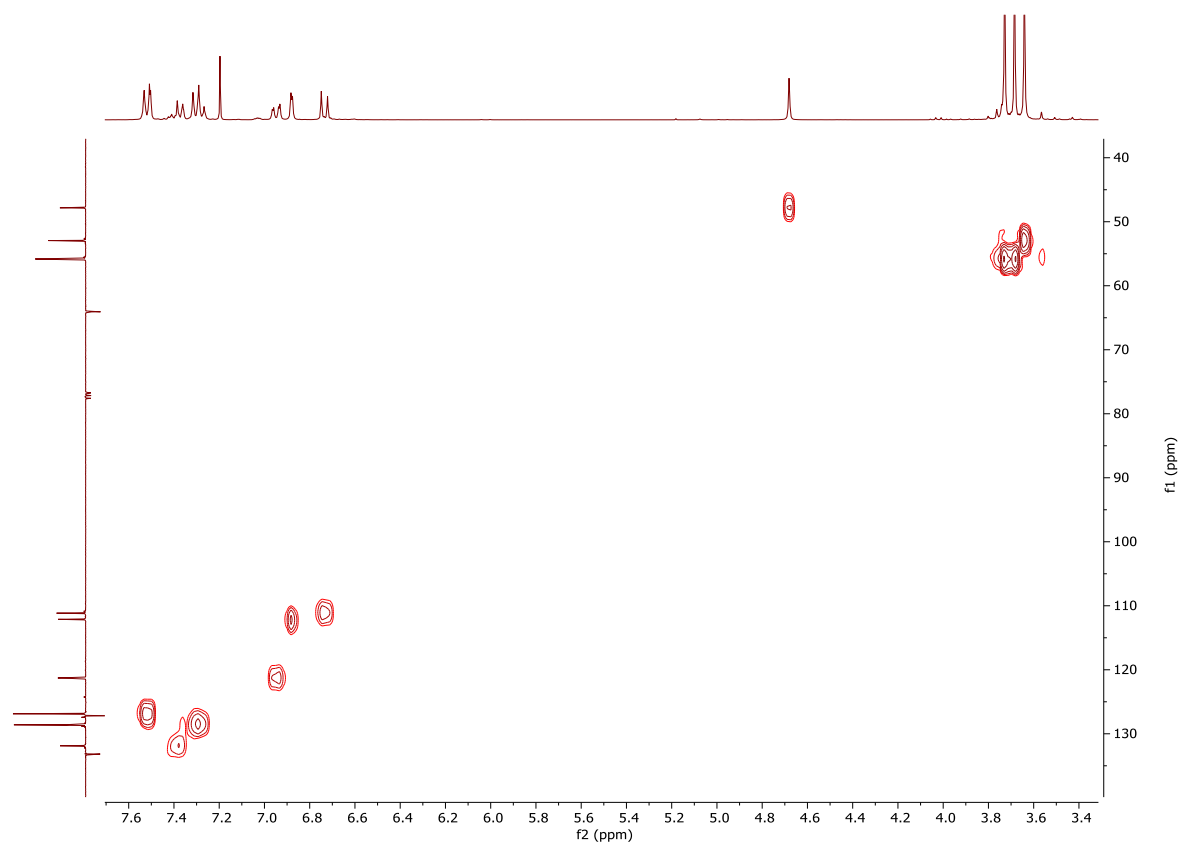

$^1\text{H}$ - $^{13}\text{C}$  HSQC ( $\text{CDCl}_3$ ) correlation spectrum of **2p**

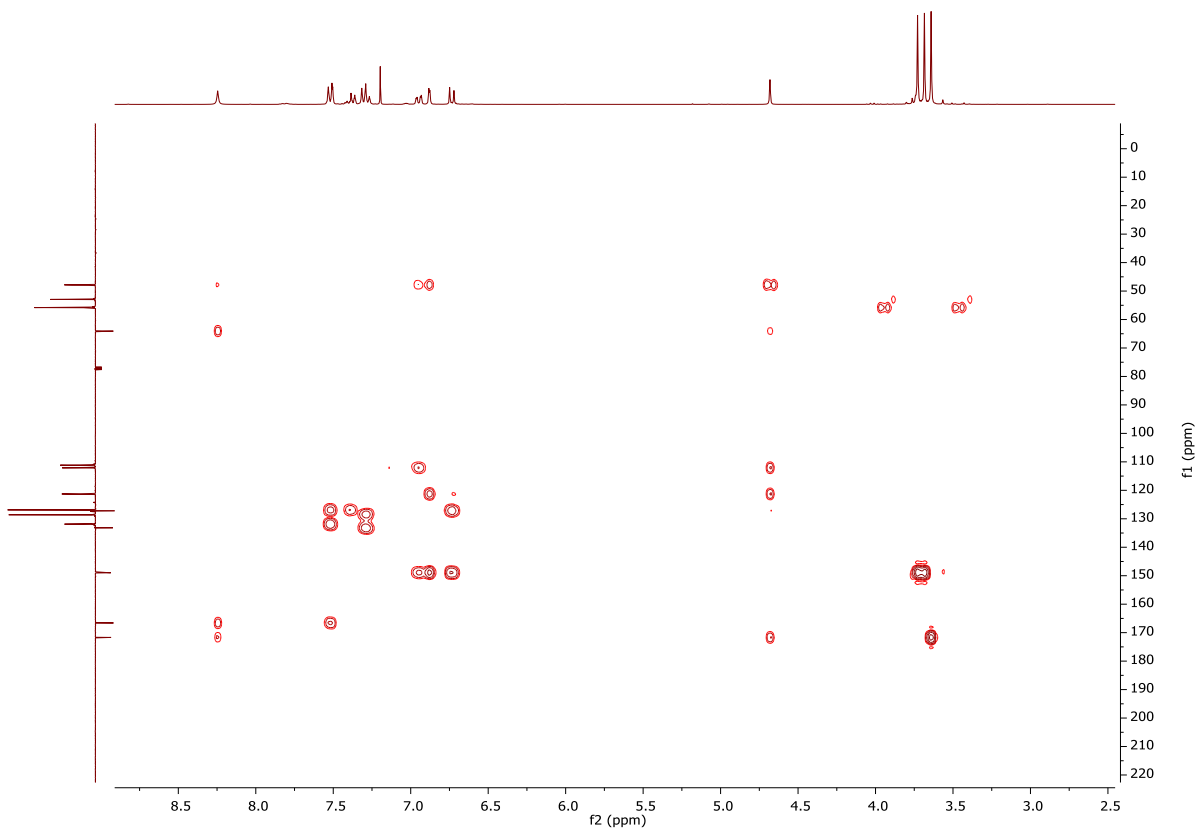

$^1\text{H}$ - $^{13}\text{C}$  HMBC ( $\text{CDCl}_3$ ) correlation spectrum of **2p**

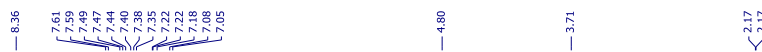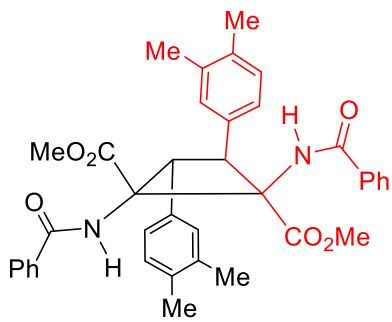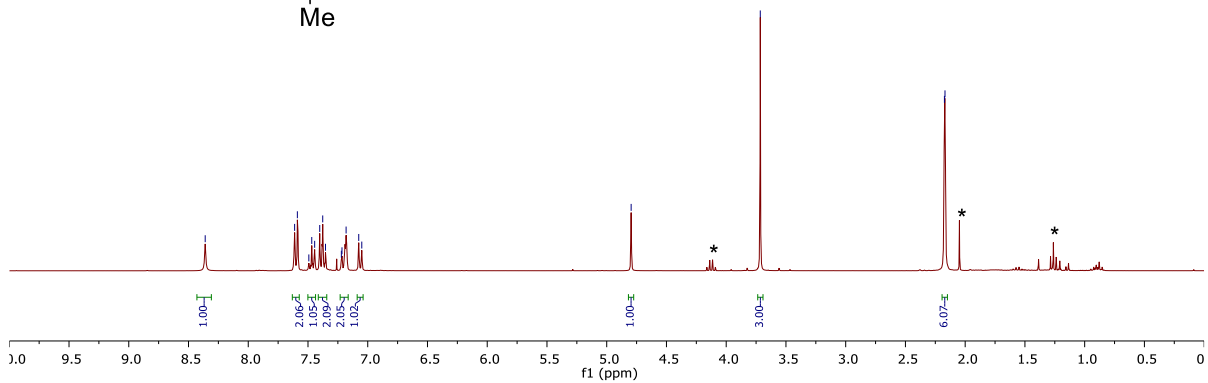

$^1\text{H}$  NMR spectrum ( $\text{CDCl}_3$ , 300.13 MHz) of **2q** (\* = ethyl acetate)

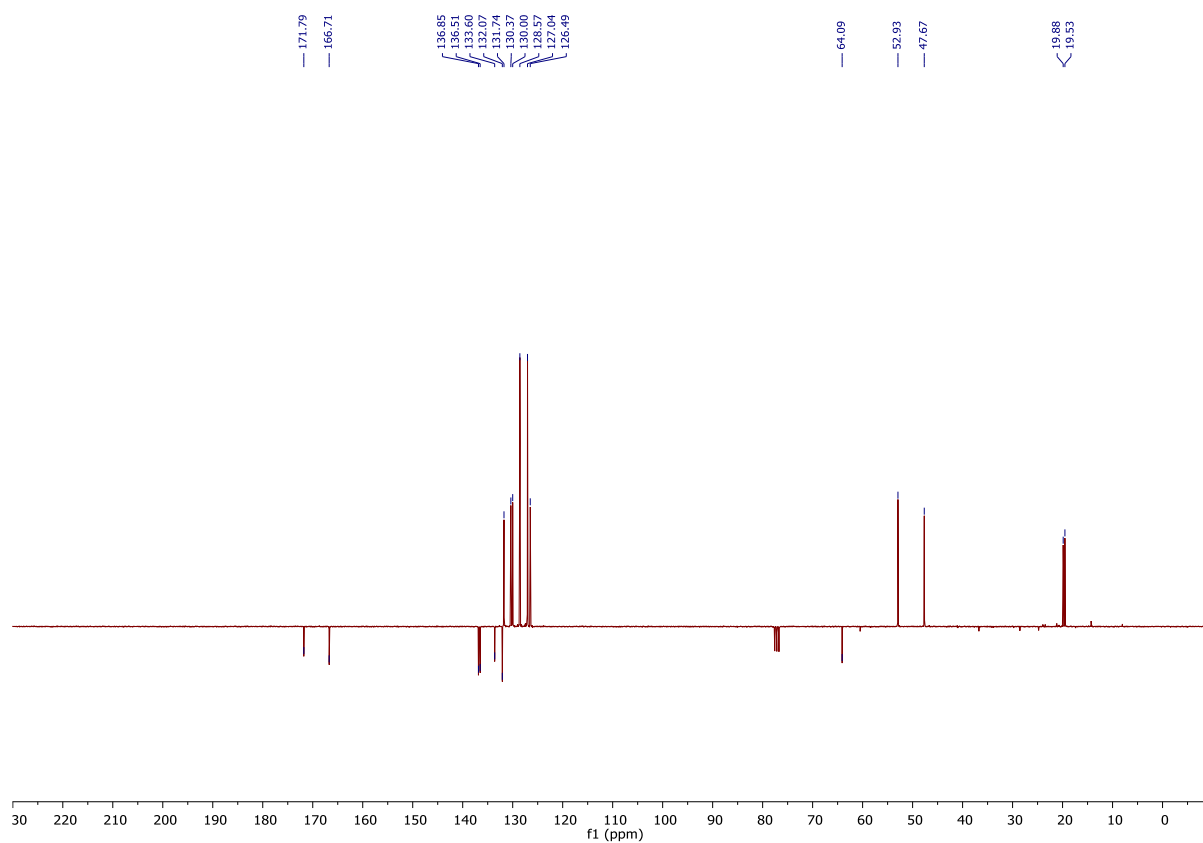

<sup>13</sup>C{<sup>1</sup>H} (APT) NMR spectrum (CDCl<sub>3</sub>, 75.5 MHz) of **2q**

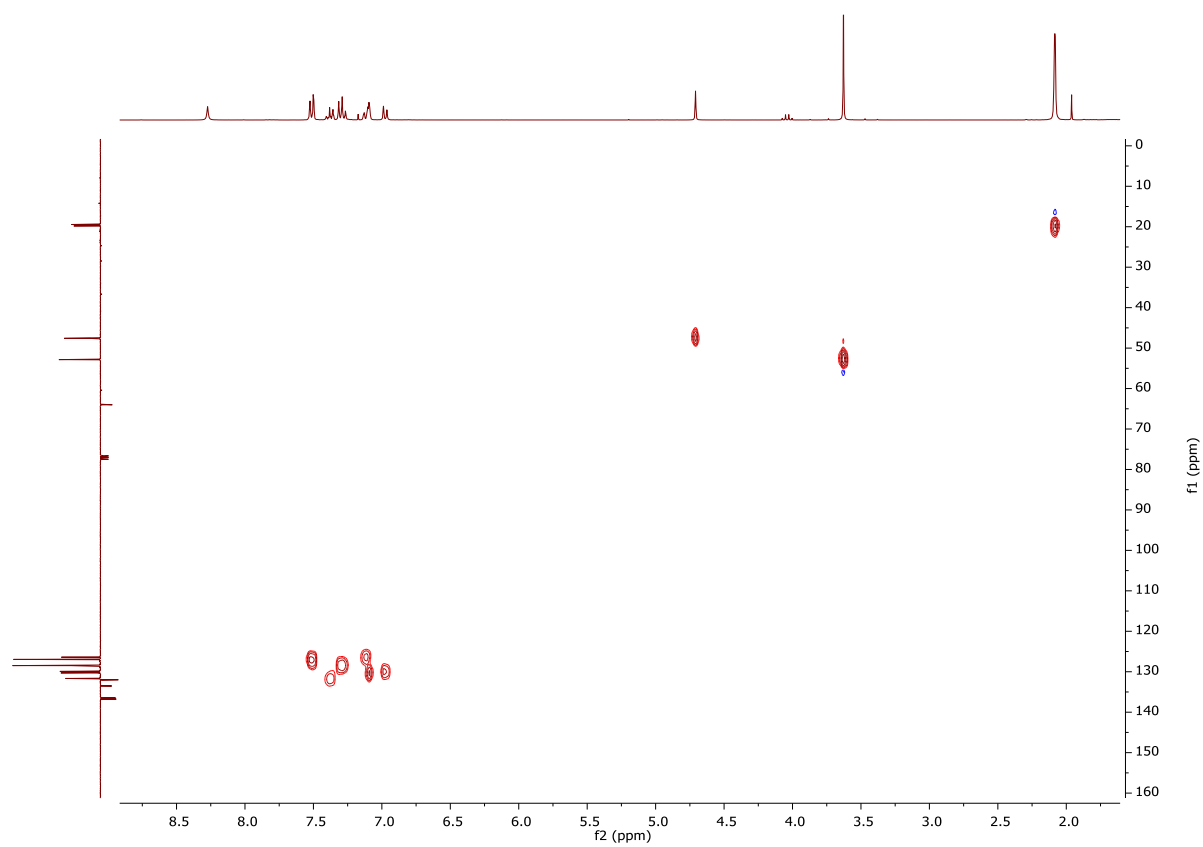

<sup>1</sup>H-<sup>13</sup>C HSQC (CDCl<sub>3</sub>) correlation spectrum of **2q**

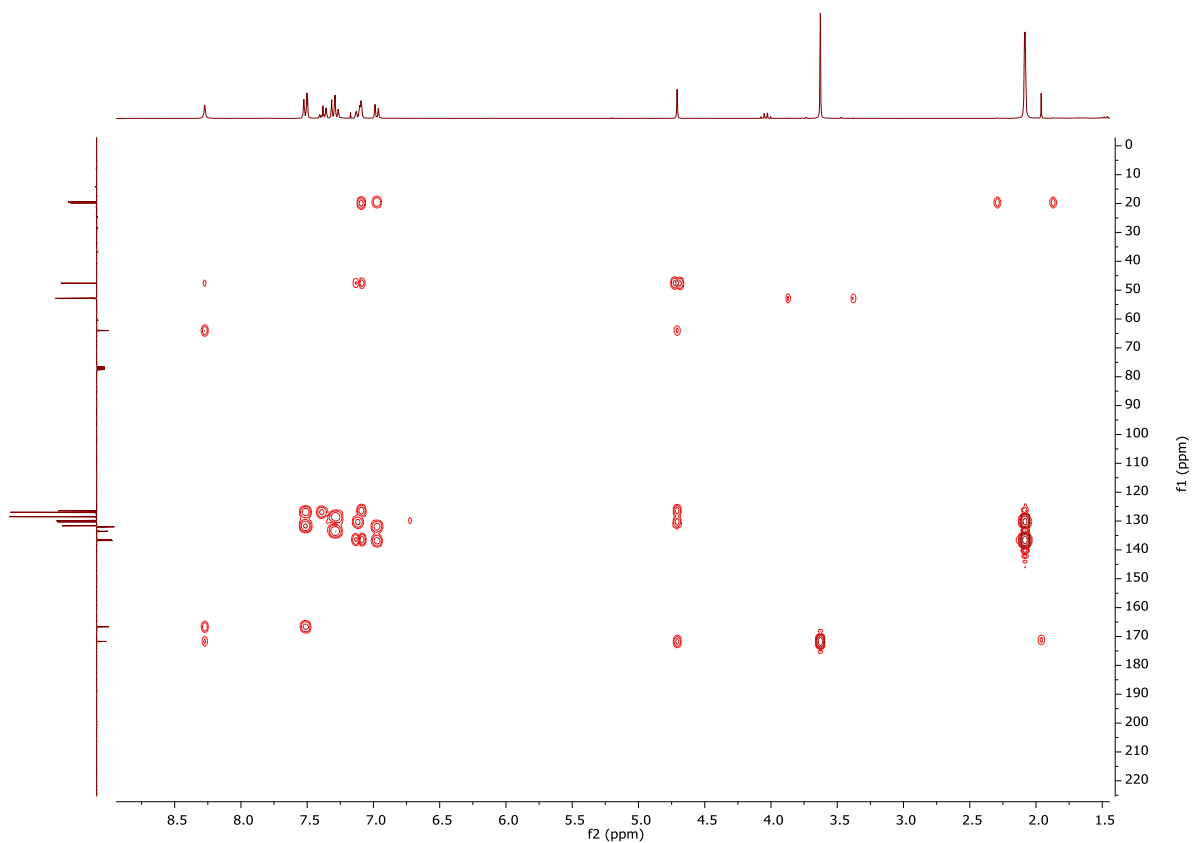

<sup>1</sup>H-<sup>13</sup>C HMBC (CDCl<sub>3</sub>) correlation spectrum of **2q**

8.06  
7.60  
7.57  
7.53  
7.51  
7.48  
7.47  
7.43  
7.41  
7.39  
7.37  
7.31  
7.30  
7.29  
7.27

4.77

3.75

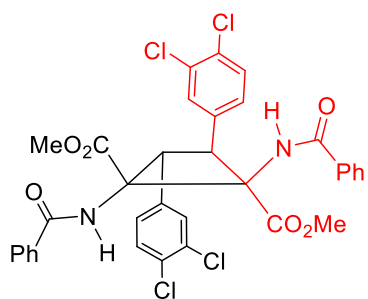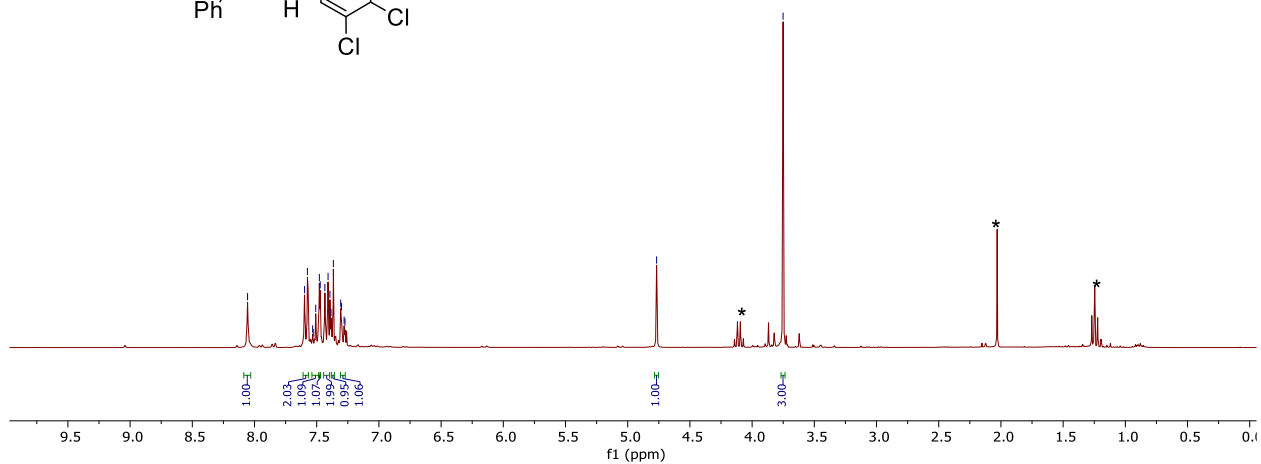

1.00

2.03

1.04

1.07

1.99

0.95

1.06

1.00

3.00

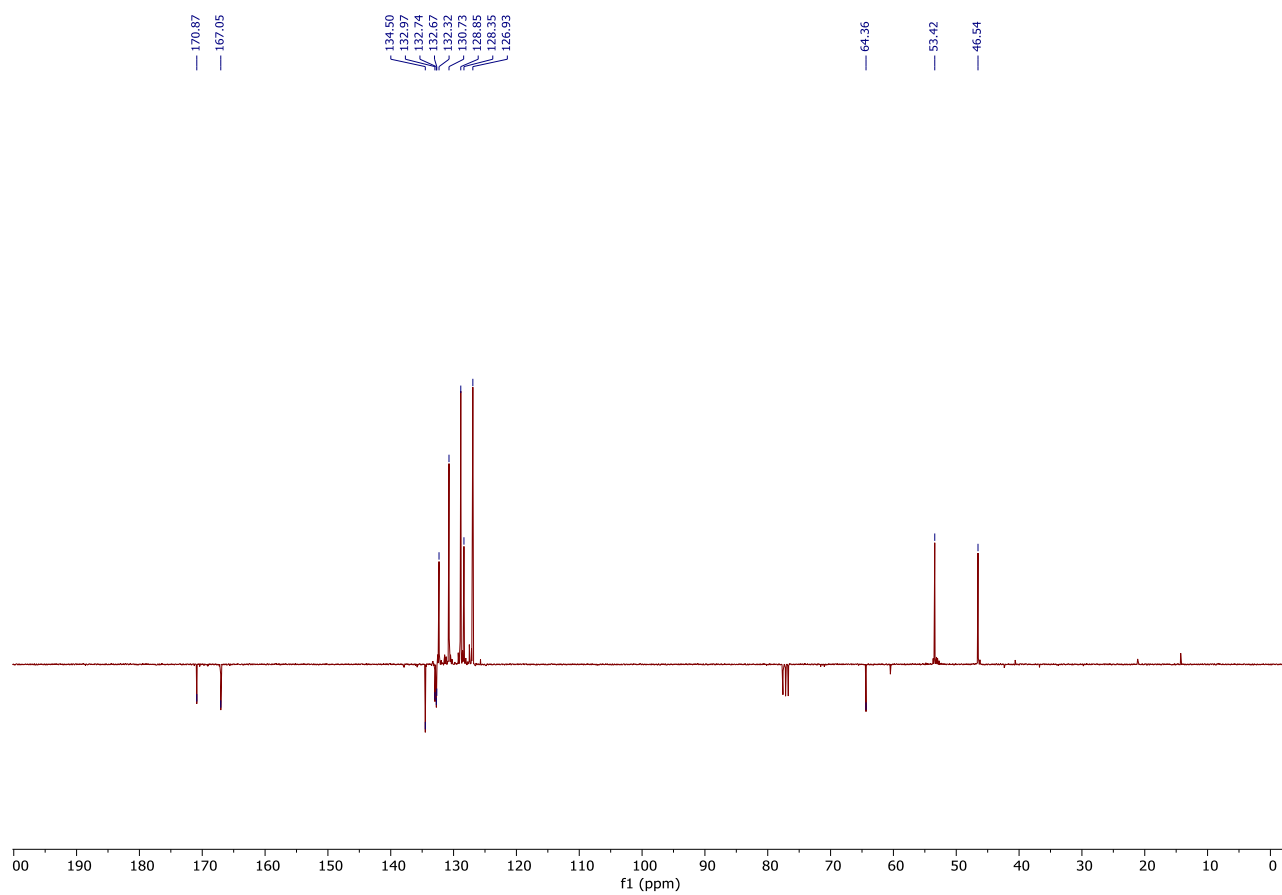

$^{13}\text{C}\{^1\text{H}\}$  (APT) NMR spectrum ( $\text{CDCl}_3$ , 75.5 MHz) of **2r**

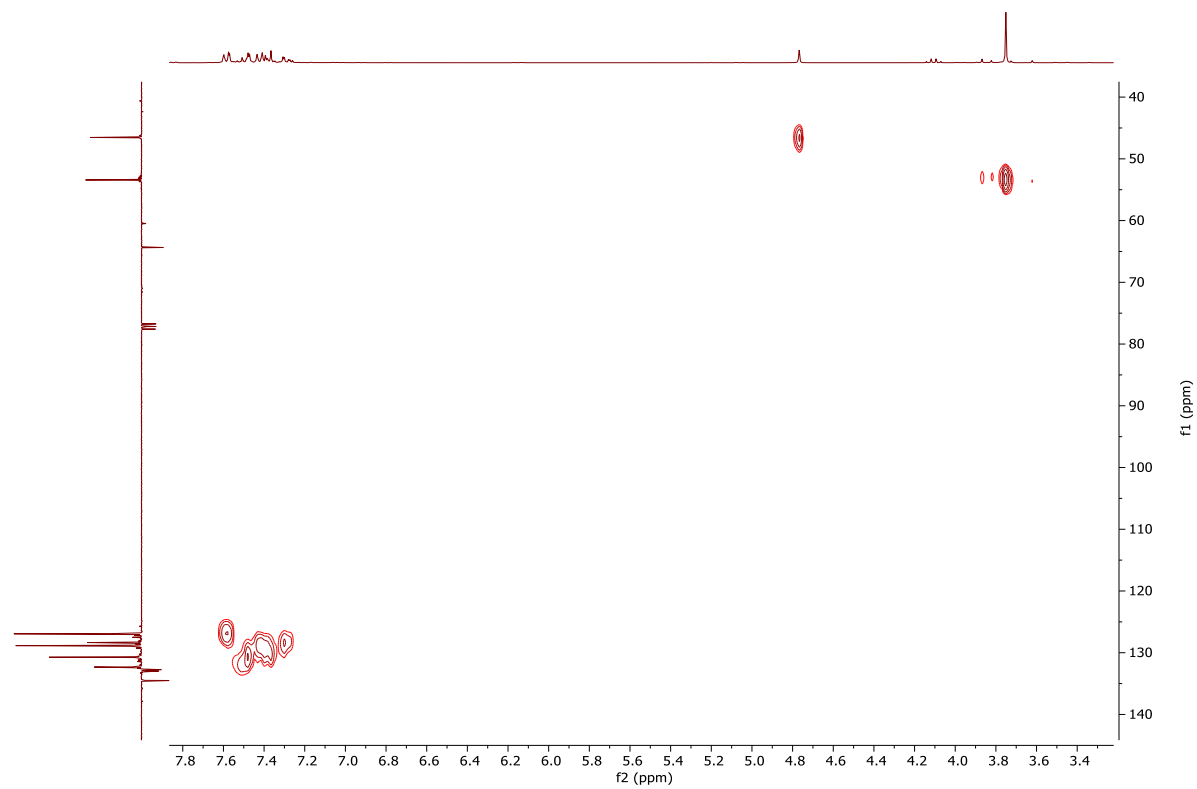

$^1\text{H}$ - $^{13}\text{C}$  HSQC ( $\text{CDCl}_3$ ) correlation spectrum of **2r**

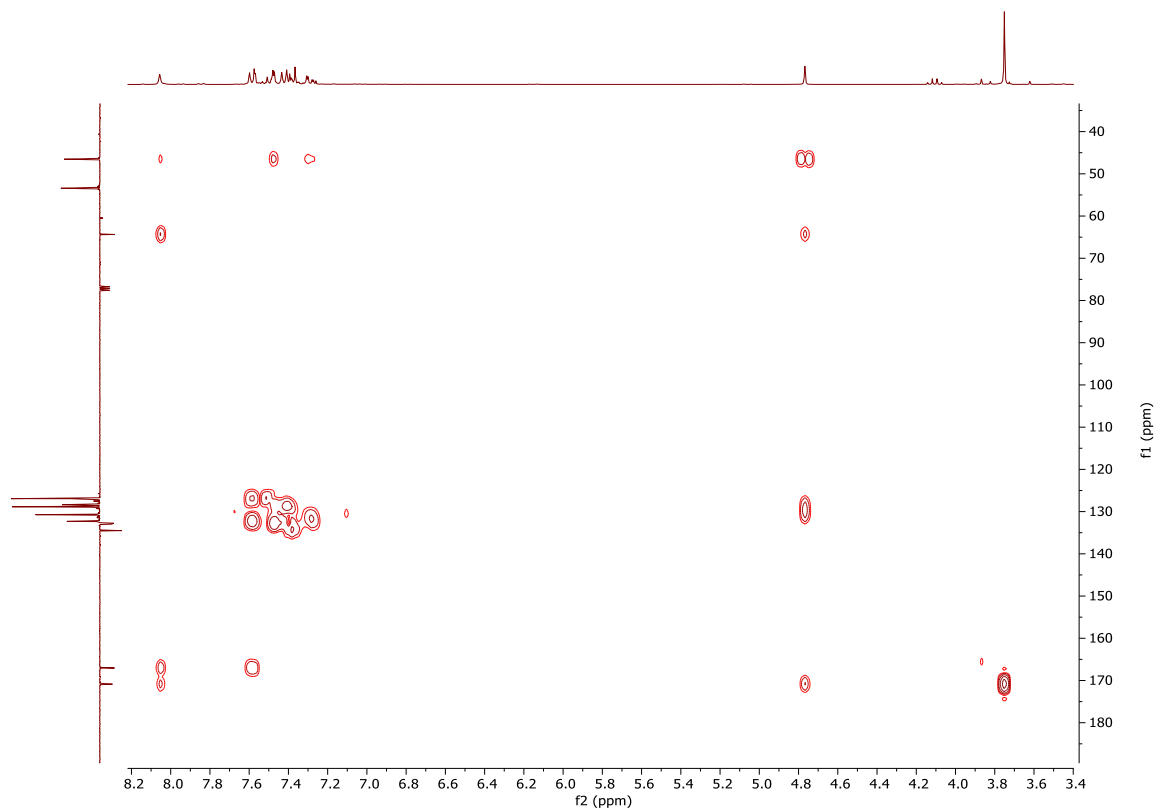

$^1\text{H}$ - $^{13}\text{C}$  HMBC ( $\text{CDCl}_3$ ) correlation spectrum of **2r**

7.08  
7.15  
7.58  
7.54  
7.52  
7.44  
7.42  
7.39  
6.97  
6.95  
6.76  
6.73  
6.70

4.77

3.76

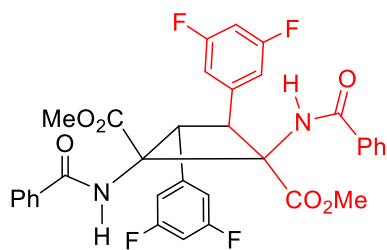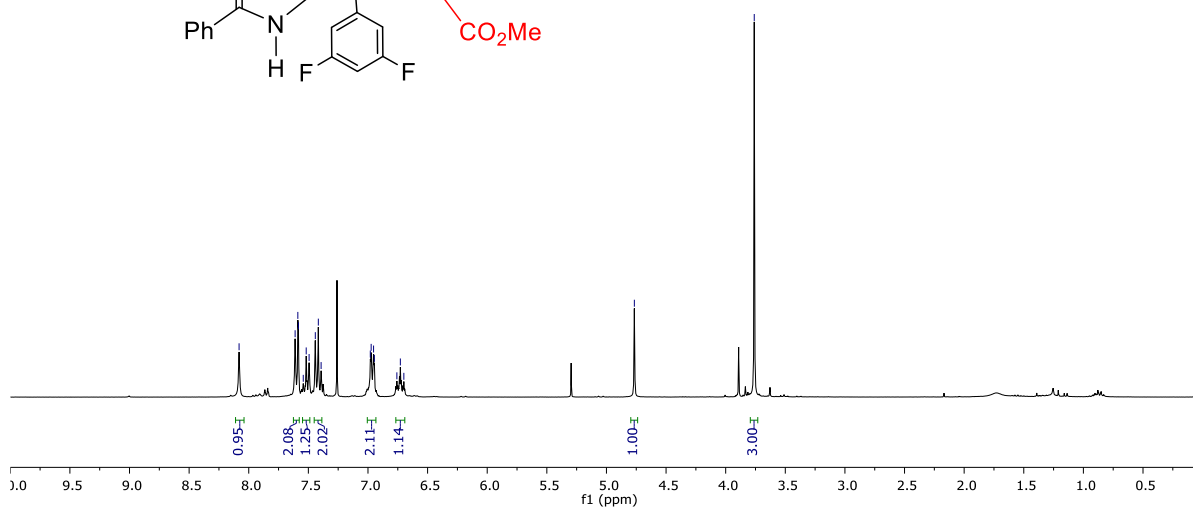

$^1\text{H}$  NMR spectrum ( $\text{CDCl}_3$ , 300.13 MHz) of **2s**



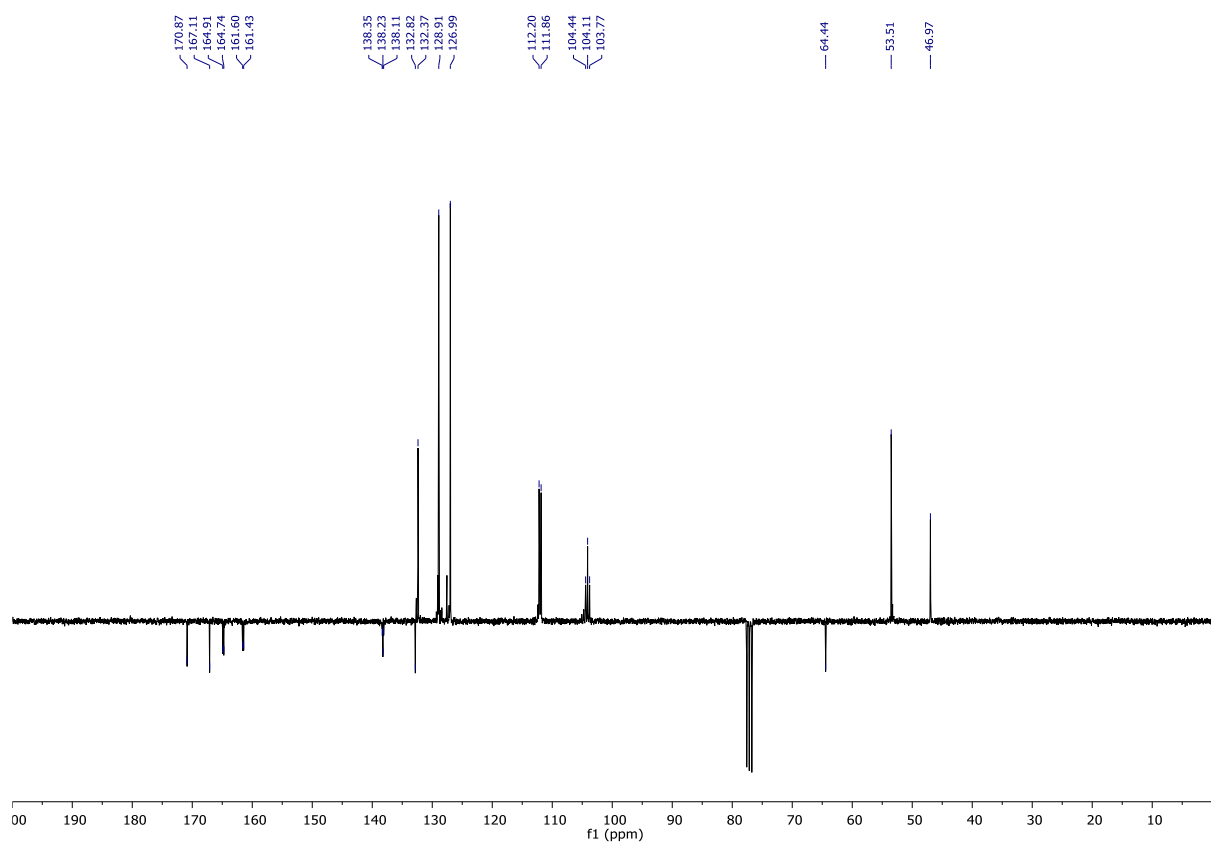

$^{13}\text{C}\{^1\text{H}\}$  (APT) NMR spectrum ( $\text{CDCl}_3$ , 75.5 MHz) of **2s**

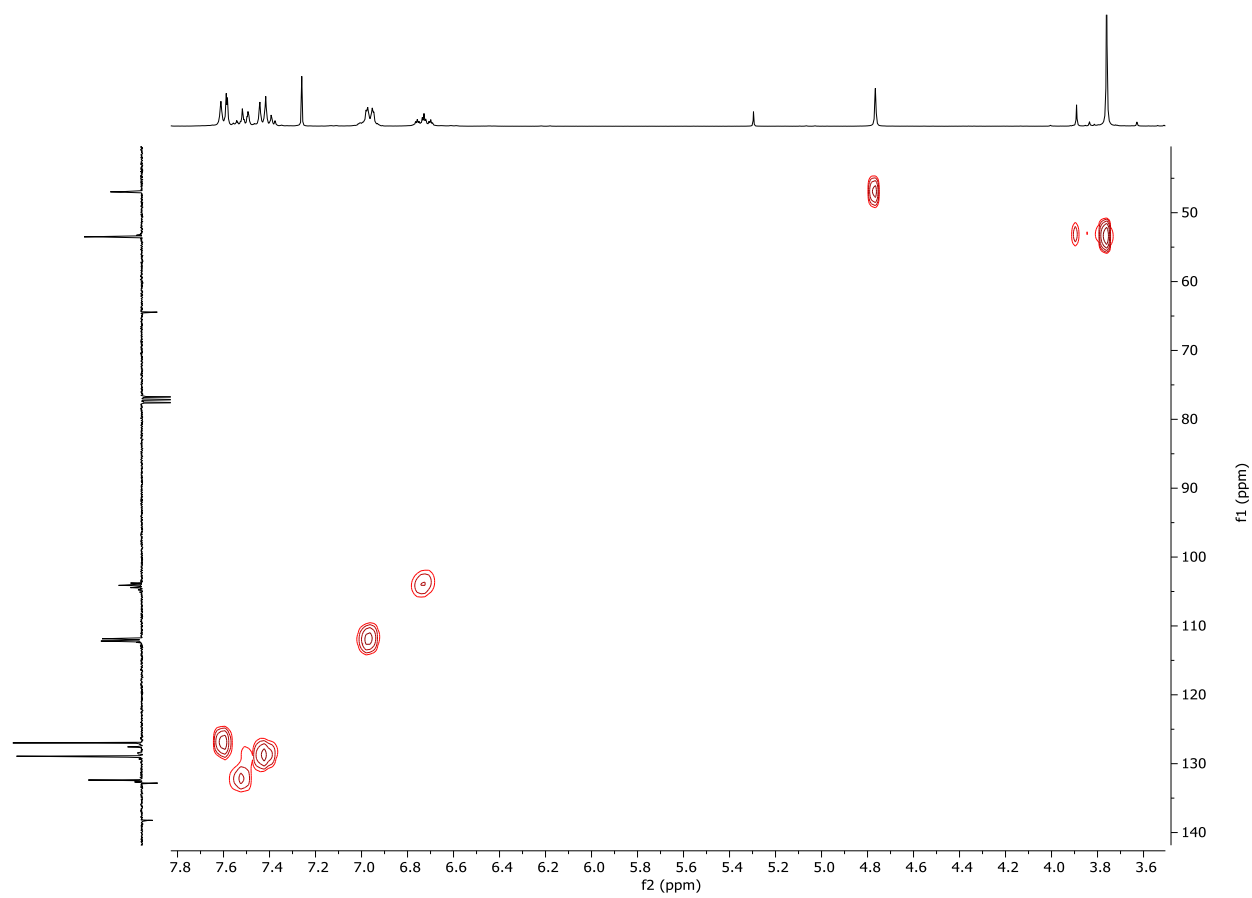

$^1\text{H}$ - $^{13}\text{C}$  HSQC ( $\text{CDCl}_3$ ) correlation spectrum of **2s**

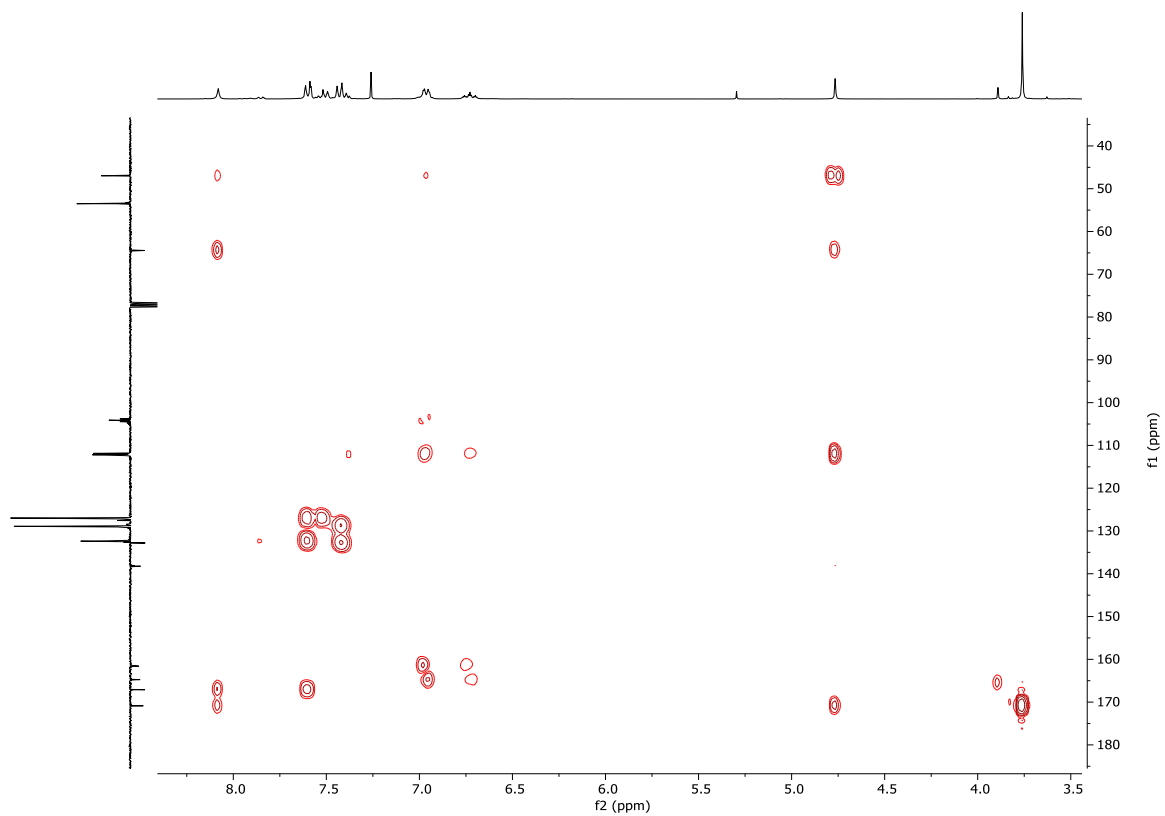

$^1\text{H}$ - $^{13}\text{C}$  HMBC ( $\text{CDCl}_3$ ) correlation spectrum of **2s**

-108.42

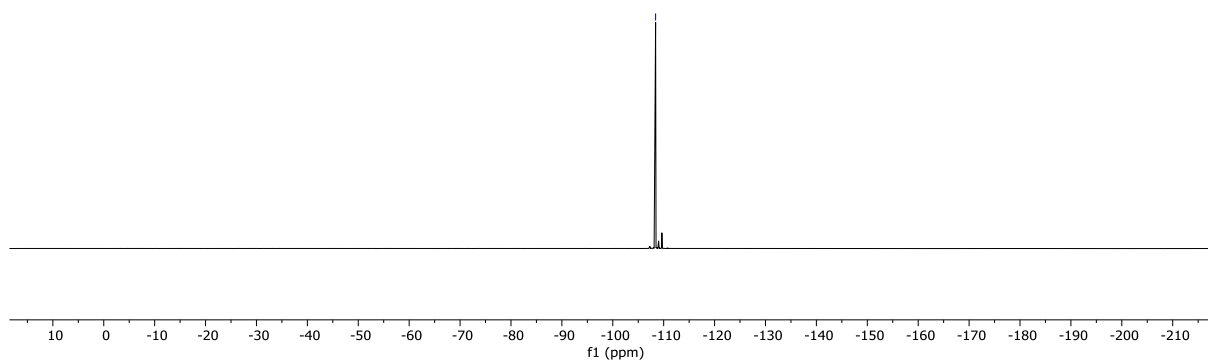

$^{19}\text{F}\{^1\text{H}\}$  NMR spectrum ( $\text{CDCl}_3$ , 282.40 MHz) of **2s**

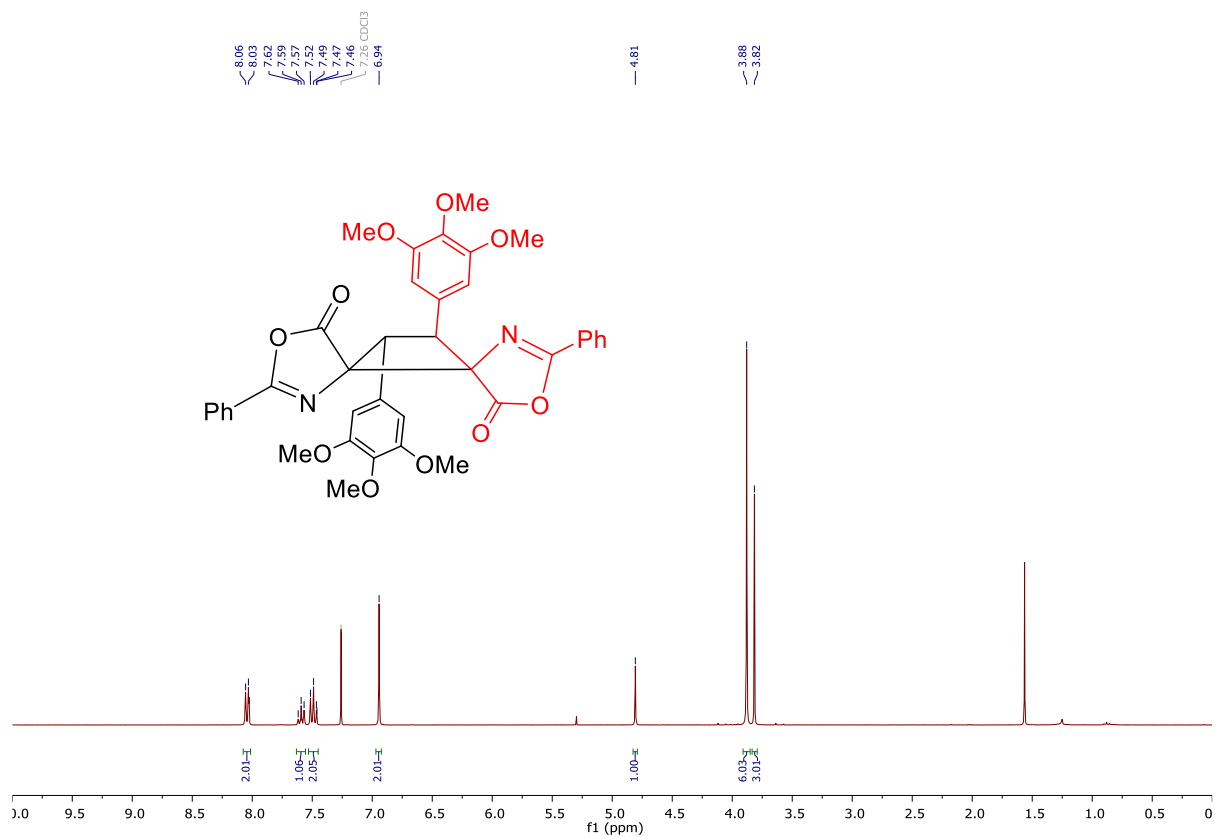

<sup>1</sup>H NMR spectrum (CDCl<sub>3</sub>, 300.13 MHz) of **2t\***

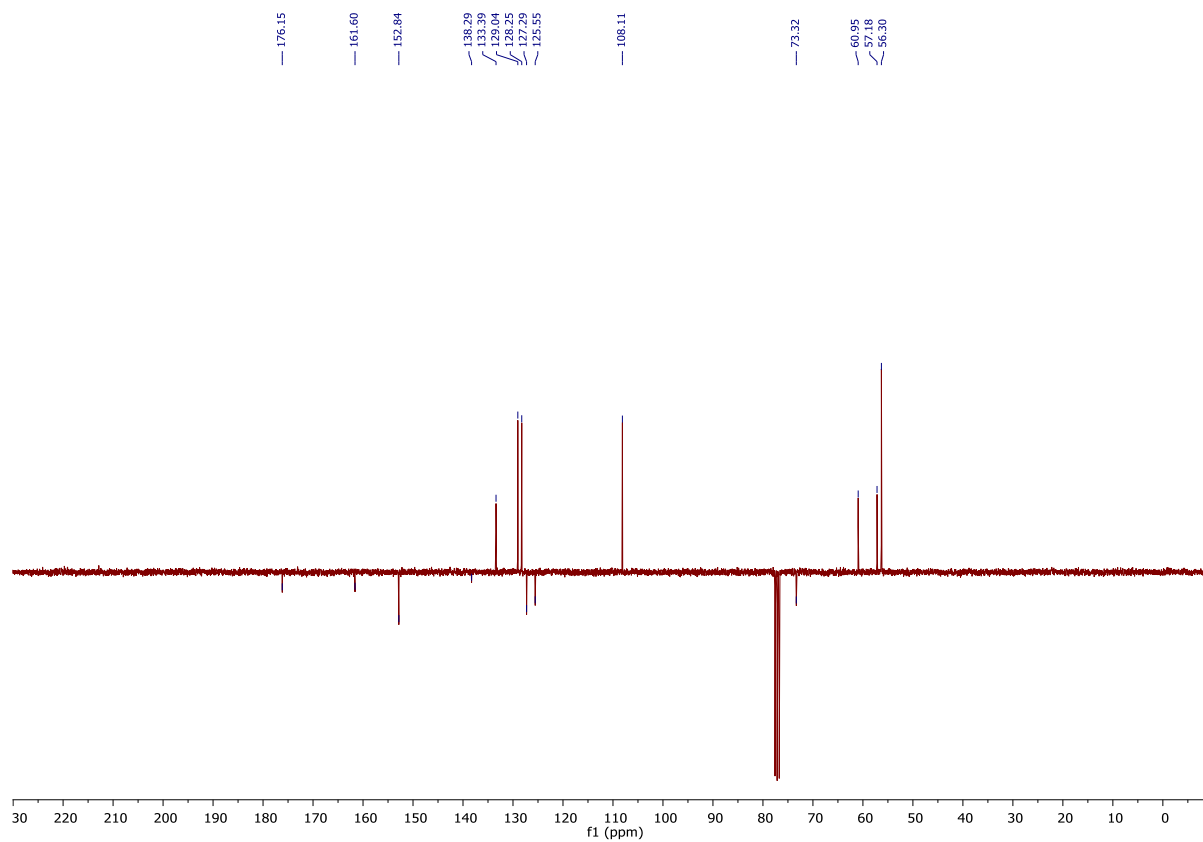

<sup>13</sup>C{<sup>1</sup>H} (APT) NMR spectrum (CDCl<sub>3</sub>, 75.5 MHz) of **2t\***

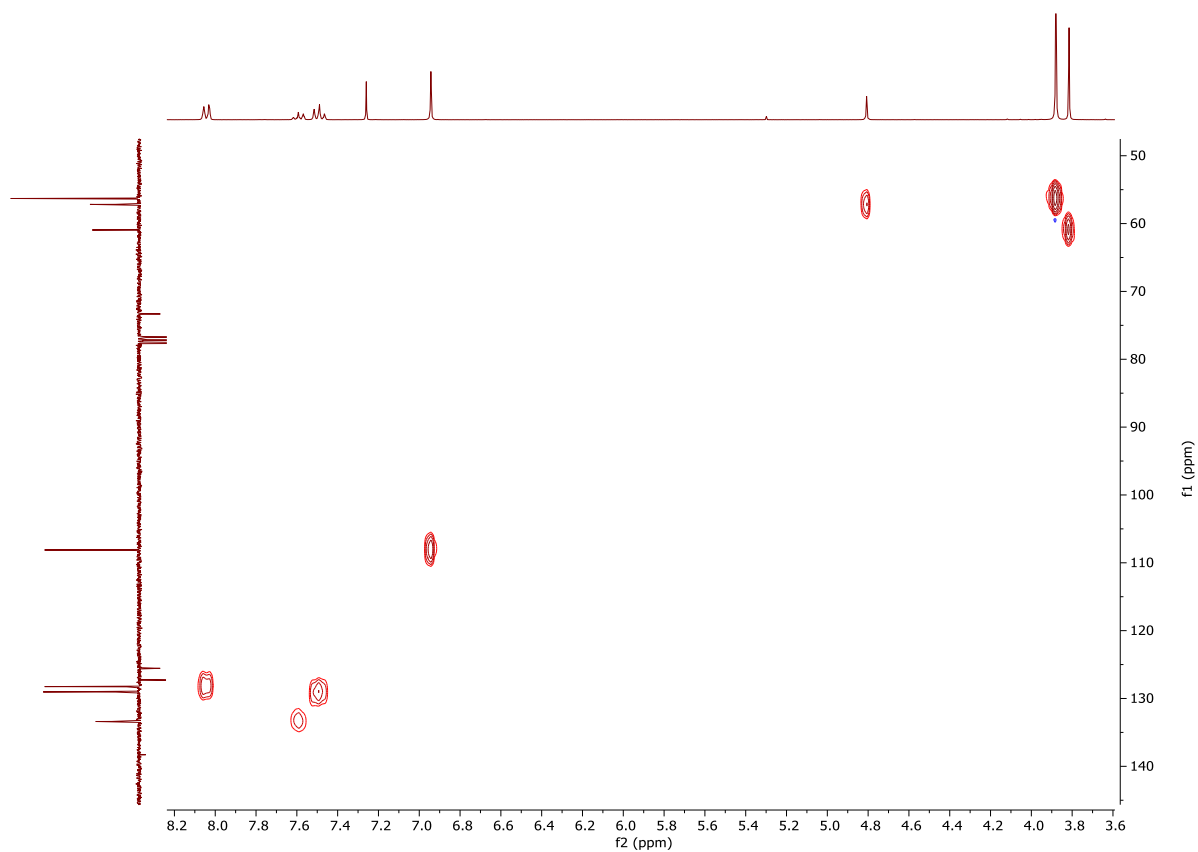

$^1\text{H}$ - $^{13}\text{C}$  HSQC ( $\text{CDCl}_3$ ) correlation spectrum of **2t\***

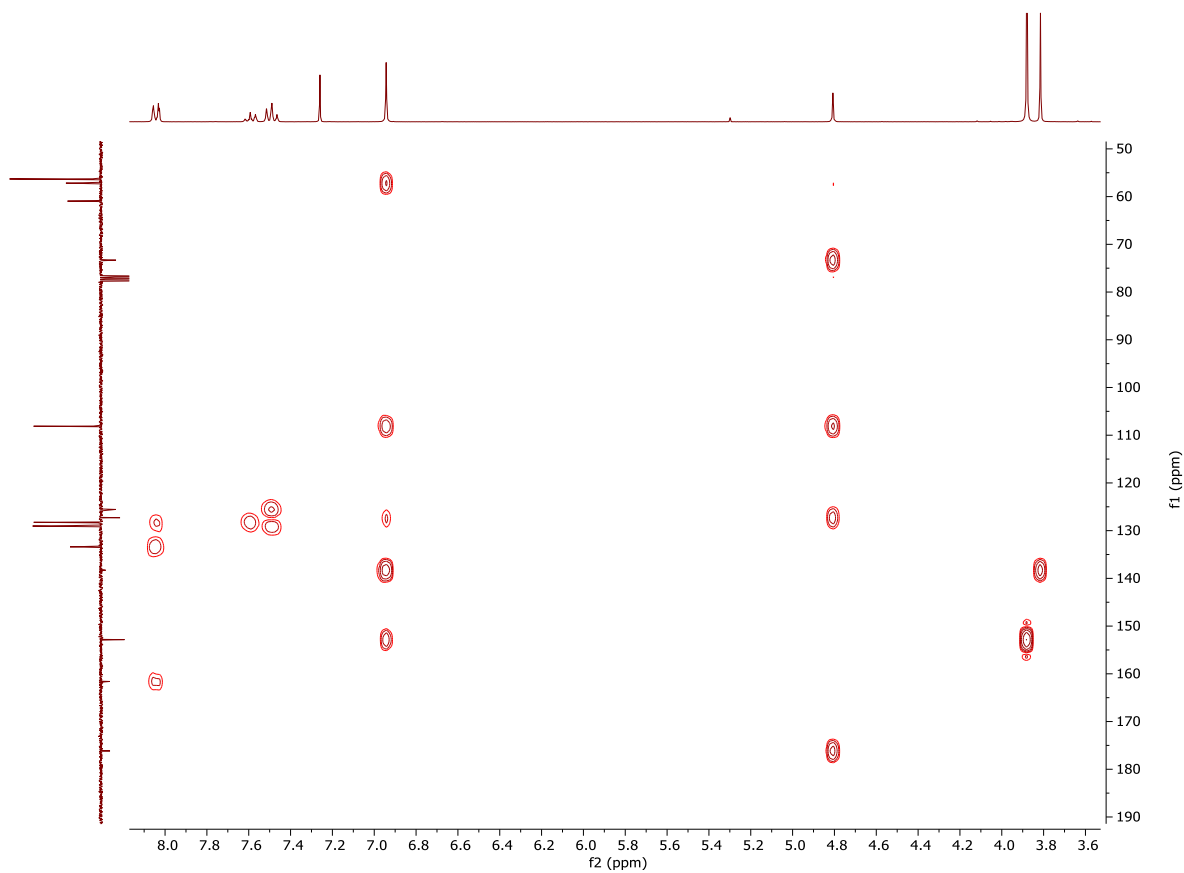

$^1\text{H}$ - $^{13}\text{C}$  HMBC ( $\text{CDCl}_3$ ) correlation spectrum of **2t\***

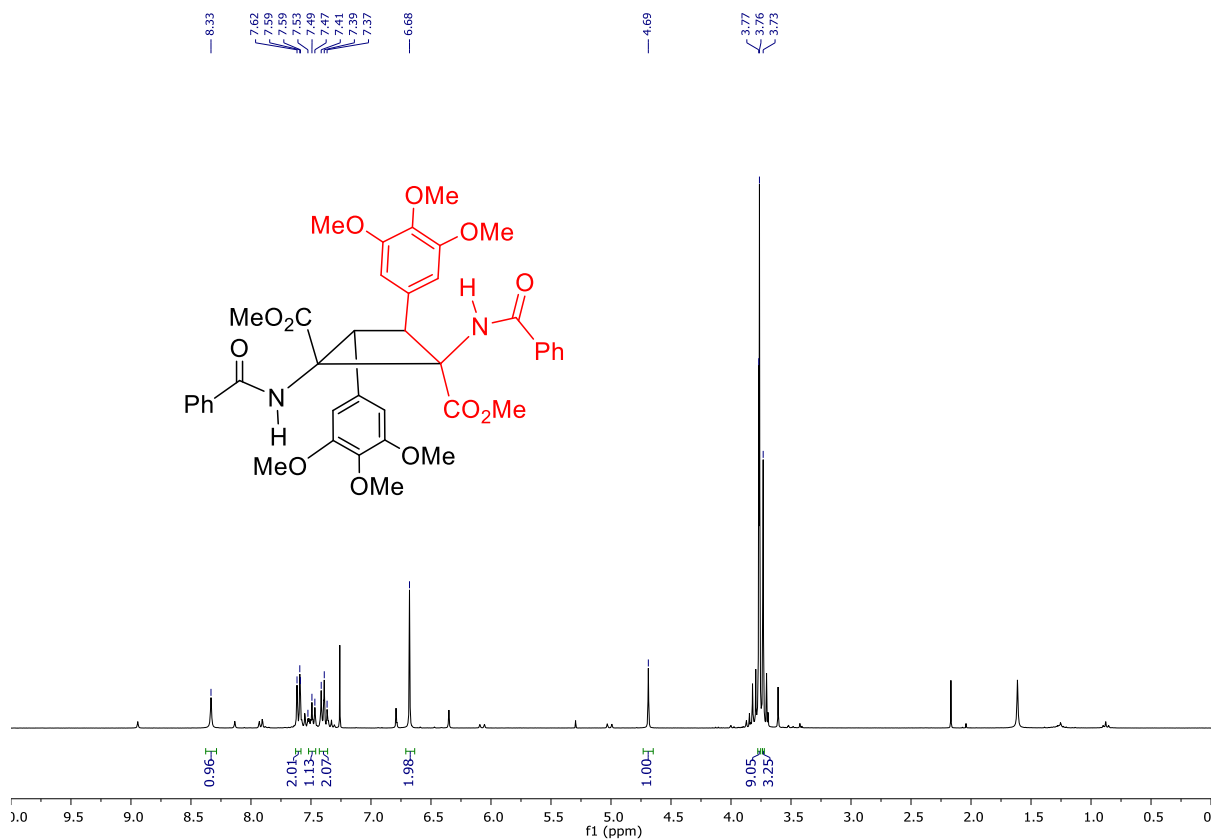

**<sup>1</sup>H NMR spectrum (CDCl<sub>3</sub>, 300.13 MHz) of **2t****

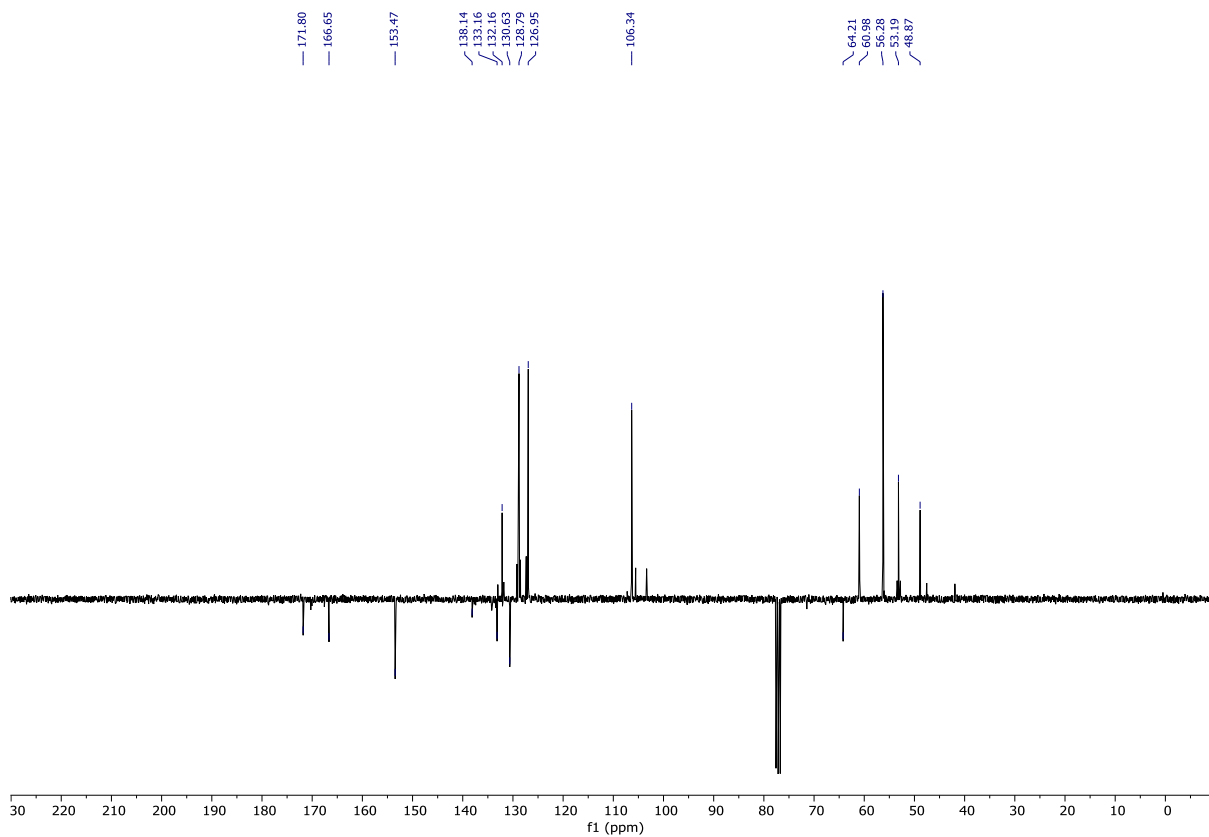

**<sup>13</sup>C{<sup>1</sup>H} (APT) NMR spectrum (CDCl<sub>3</sub>, 75.5 MHz) of **2t****

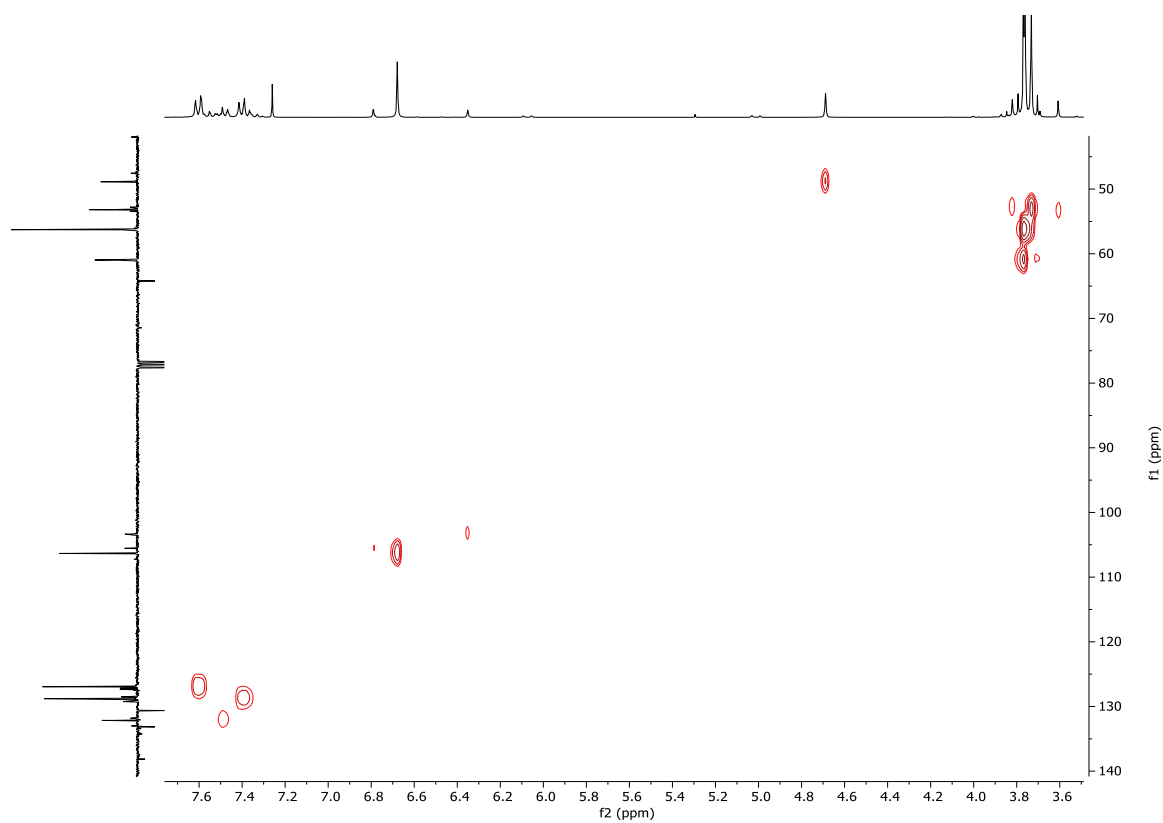

$^1\text{H}$ - $^{13}\text{C}$  HSQC ( $\text{CDCl}_3$ ) correlation spectrum of **2t**

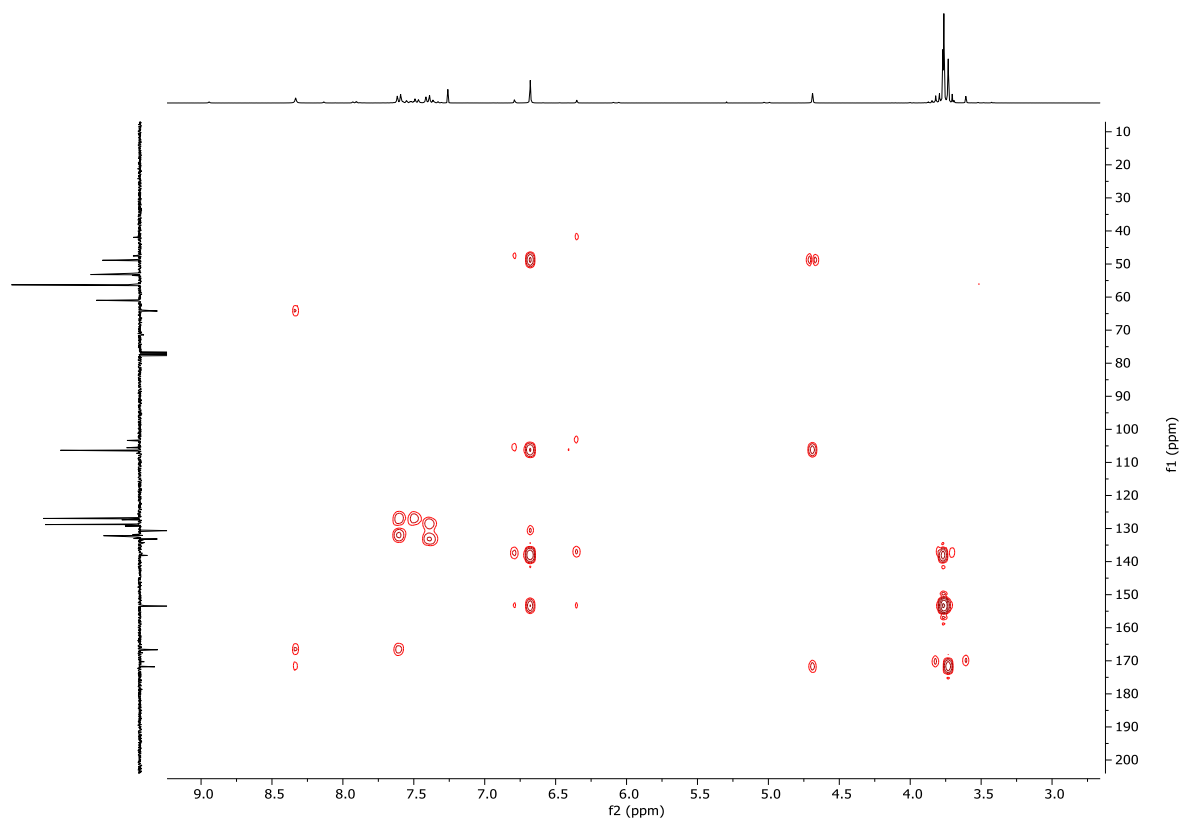

$^1\text{H}$ - $^{13}\text{C}$  HMBC ( $\text{CDCl}_3$ ) correlation spectrum of **2t**



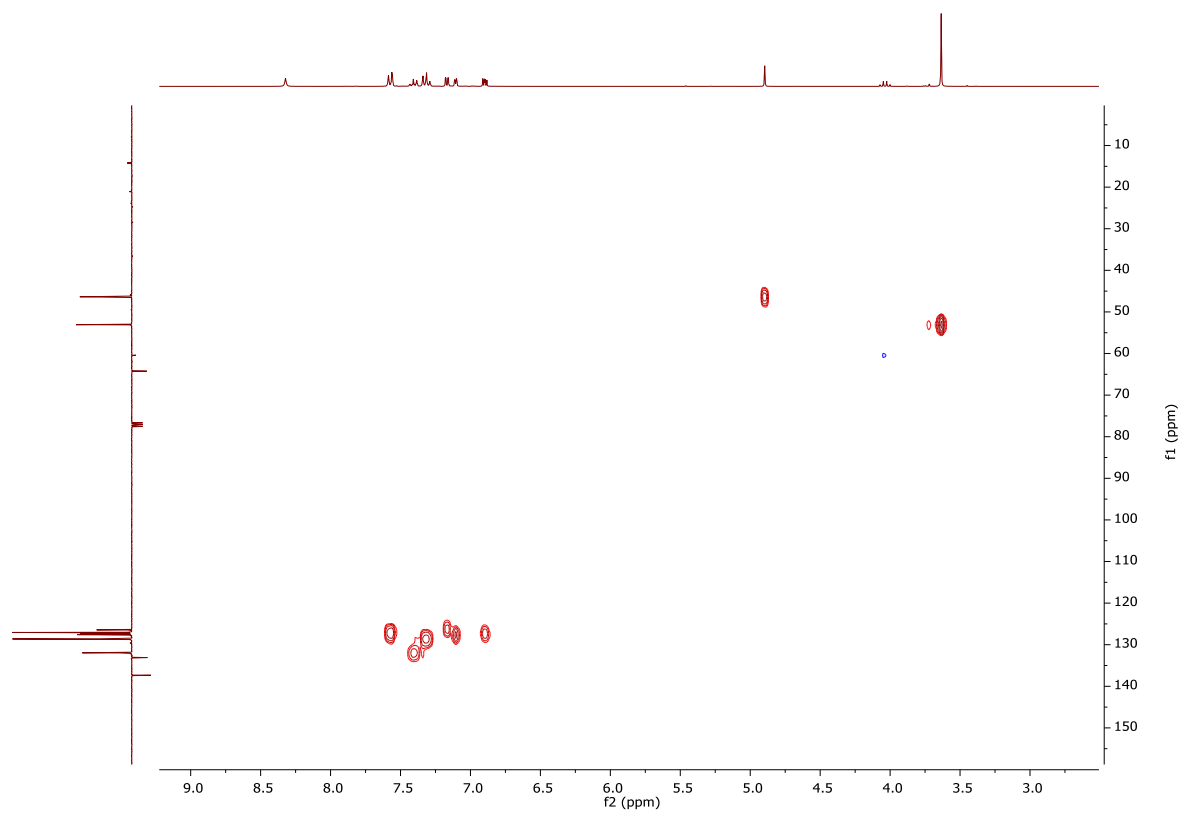

$^1\text{H}$ - $^{13}\text{C}$  HSQC ( $\text{CDCl}_3$ ) correlation spectrum of **2u**

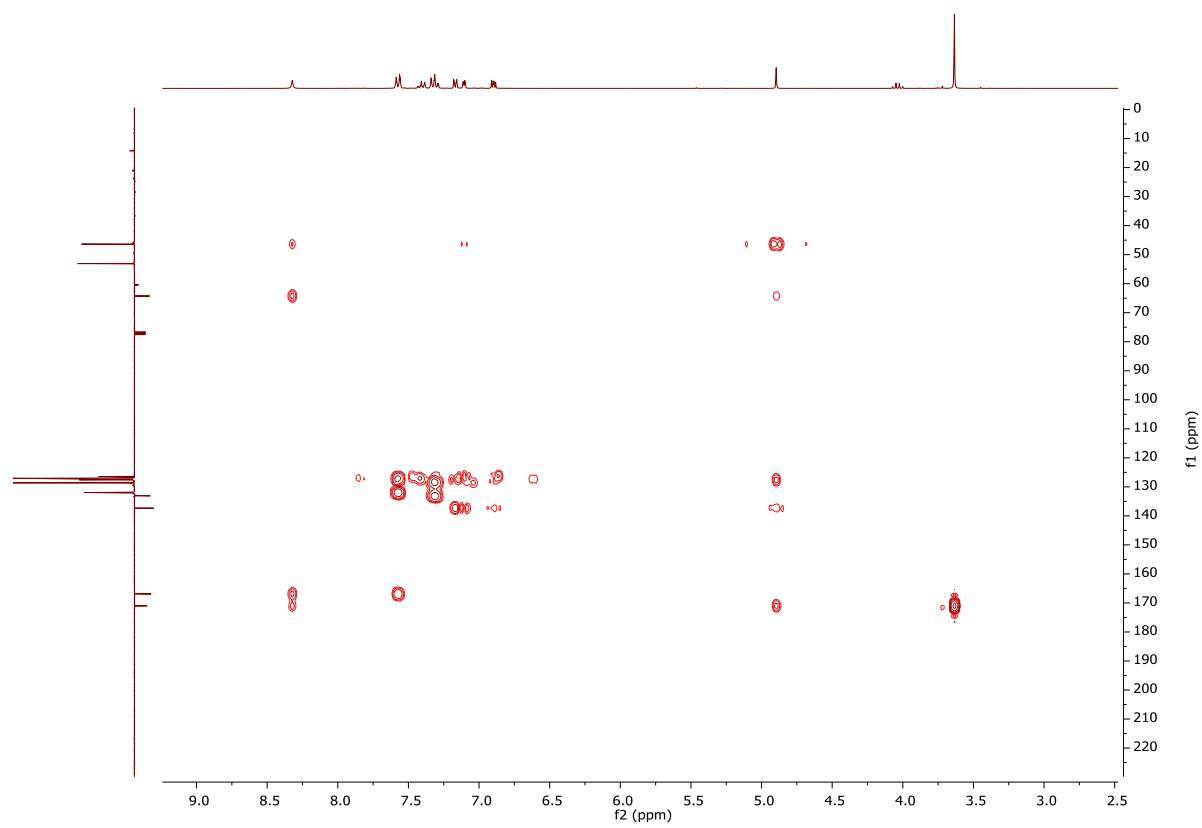

$^1\text{H}$ - $^{13}\text{C}$  HMBC ( $\text{CDCl}_3$ ) correlation spectrum of **2u**



5.-  $^1\text{H}$  NMR spectra of crudes during the synthesis of cyclobutanes 2a-2u (after washing with water, before column chromatography)

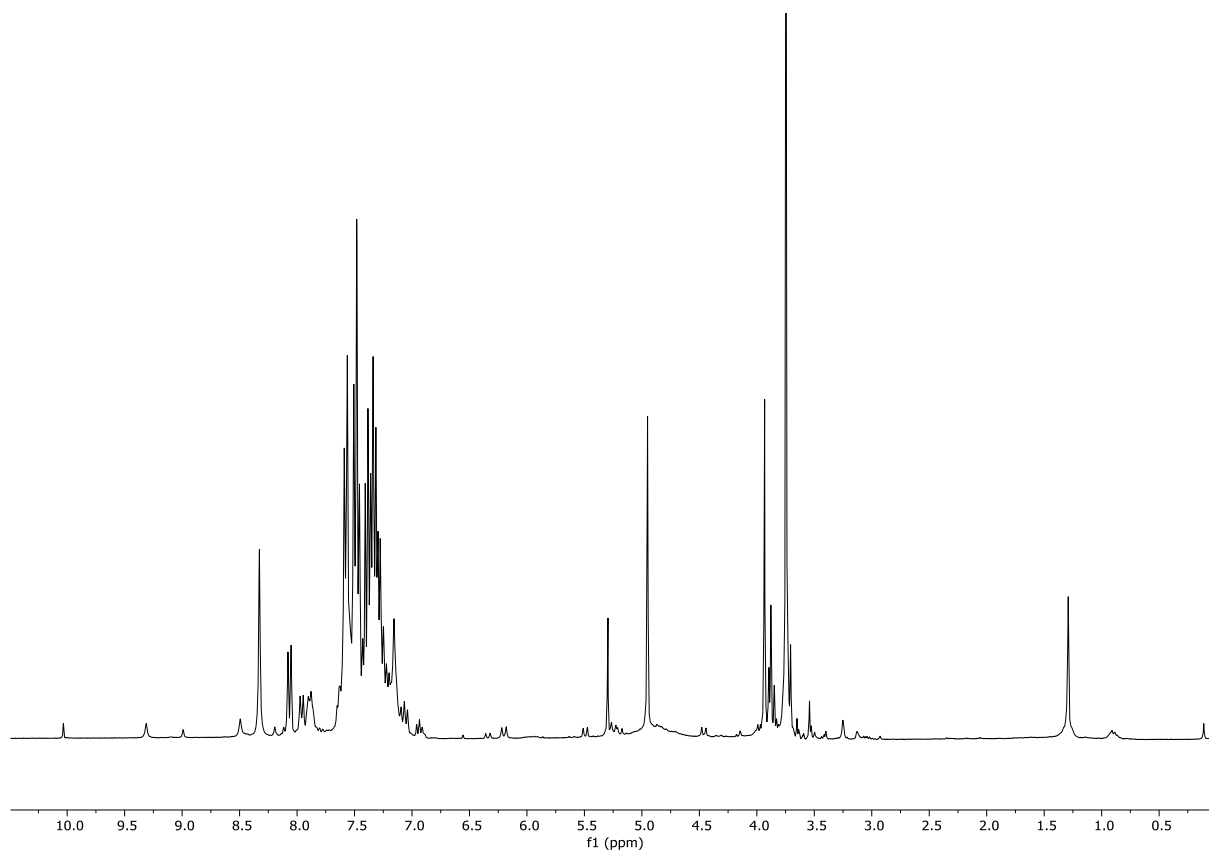

$^1\text{H}$  NMR spectrum ( $\text{CDCl}_3$ , 300.13 MHz) of crude of **2a**

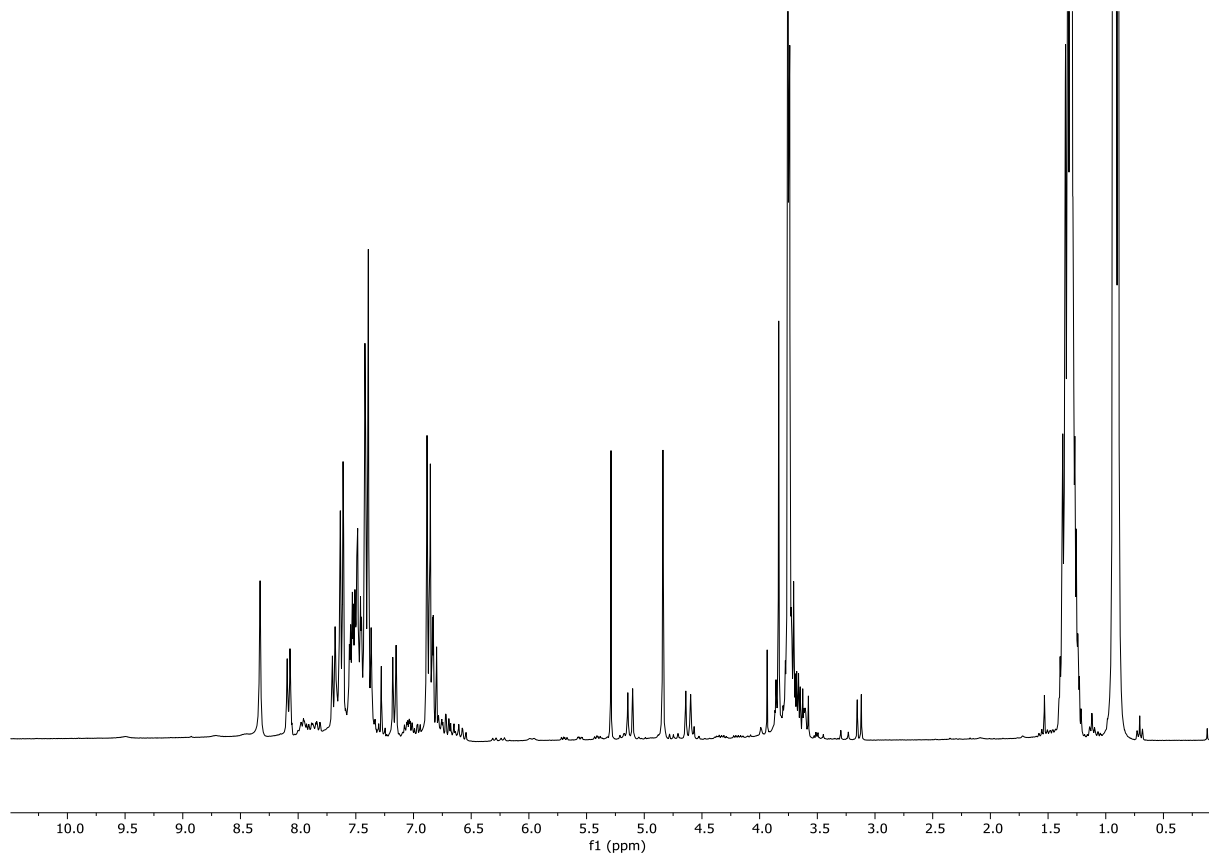

$^1\text{H}$  NMR spectrum ( $\text{CDCl}_3$ , 300.13 MHz) of crude of **2b**

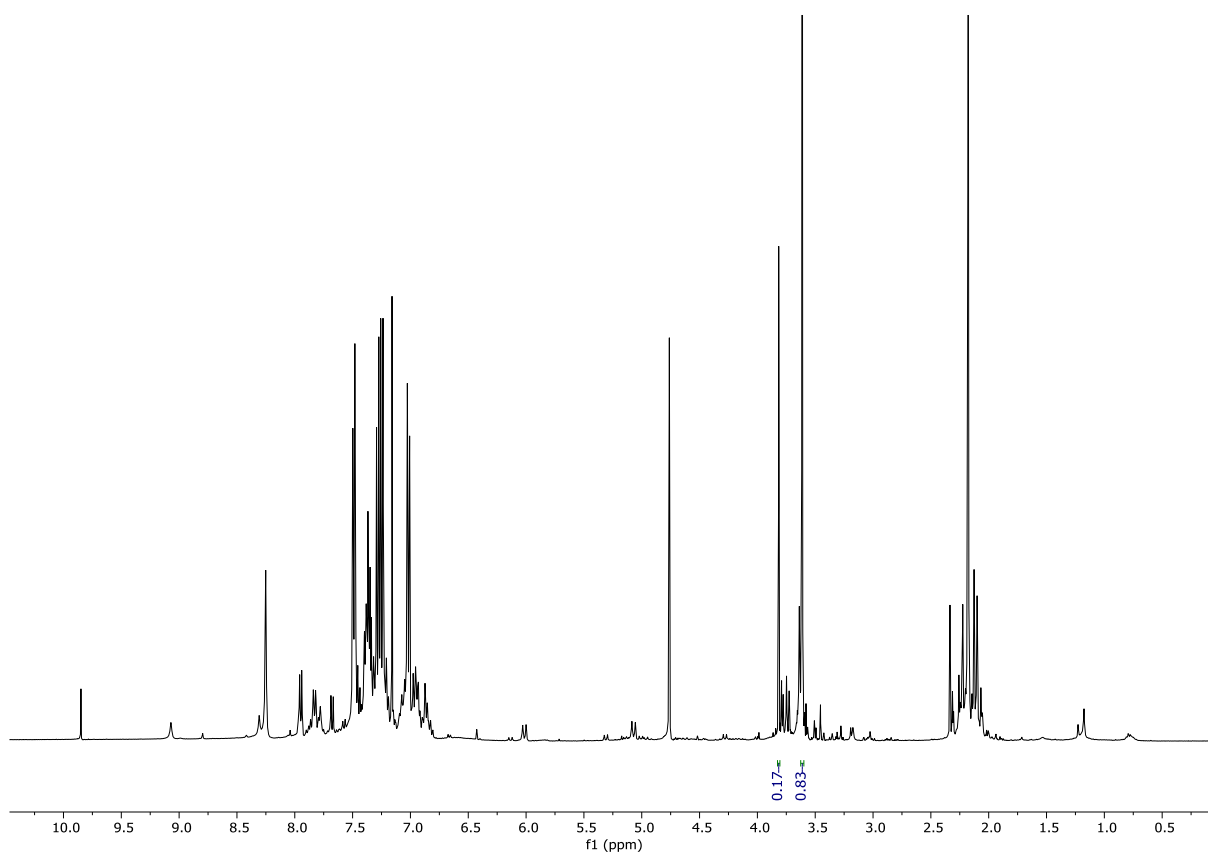

<sup>1</sup>H NMR spectrum (CDCl<sub>3</sub>, 300.13 MHz) of crude of **2c**

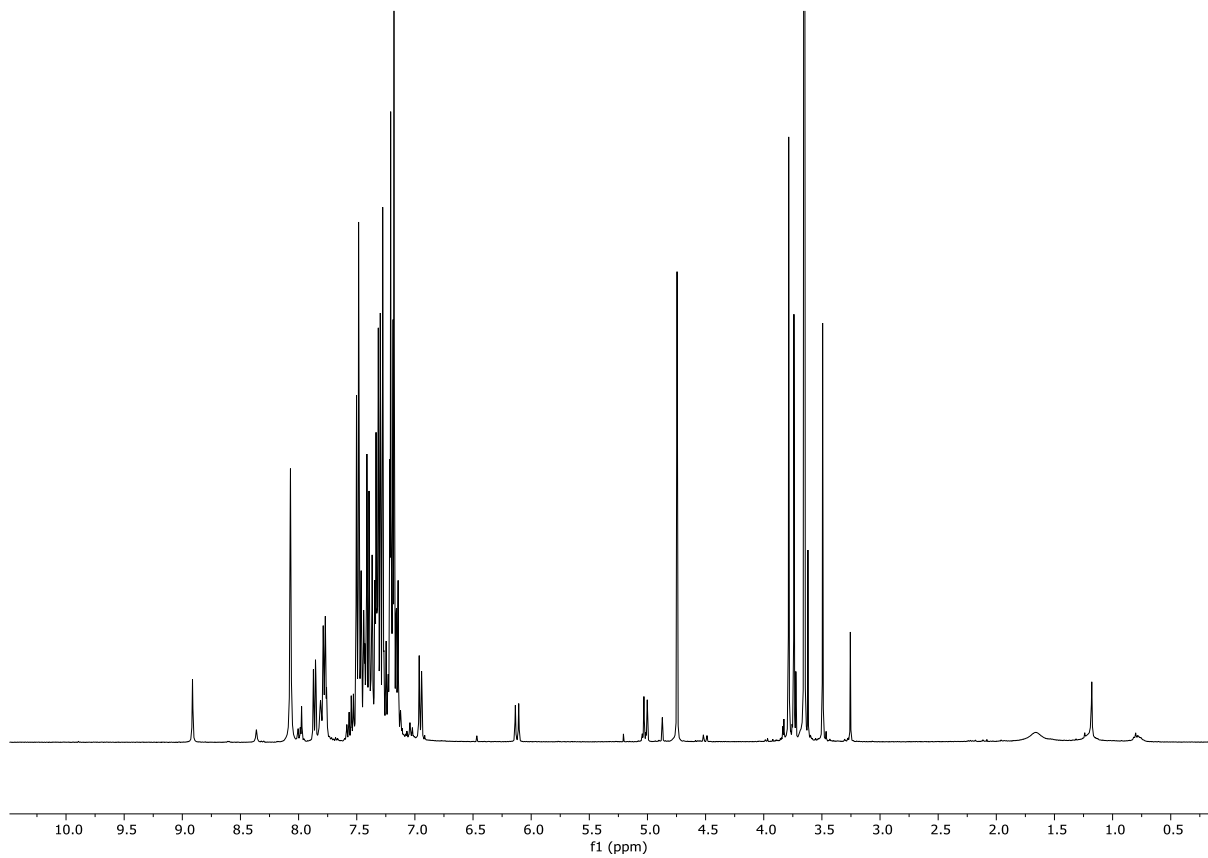

<sup>1</sup>H NMR spectrum (CDCl<sub>3</sub>, 300.13 MHz) of crude of **2d**

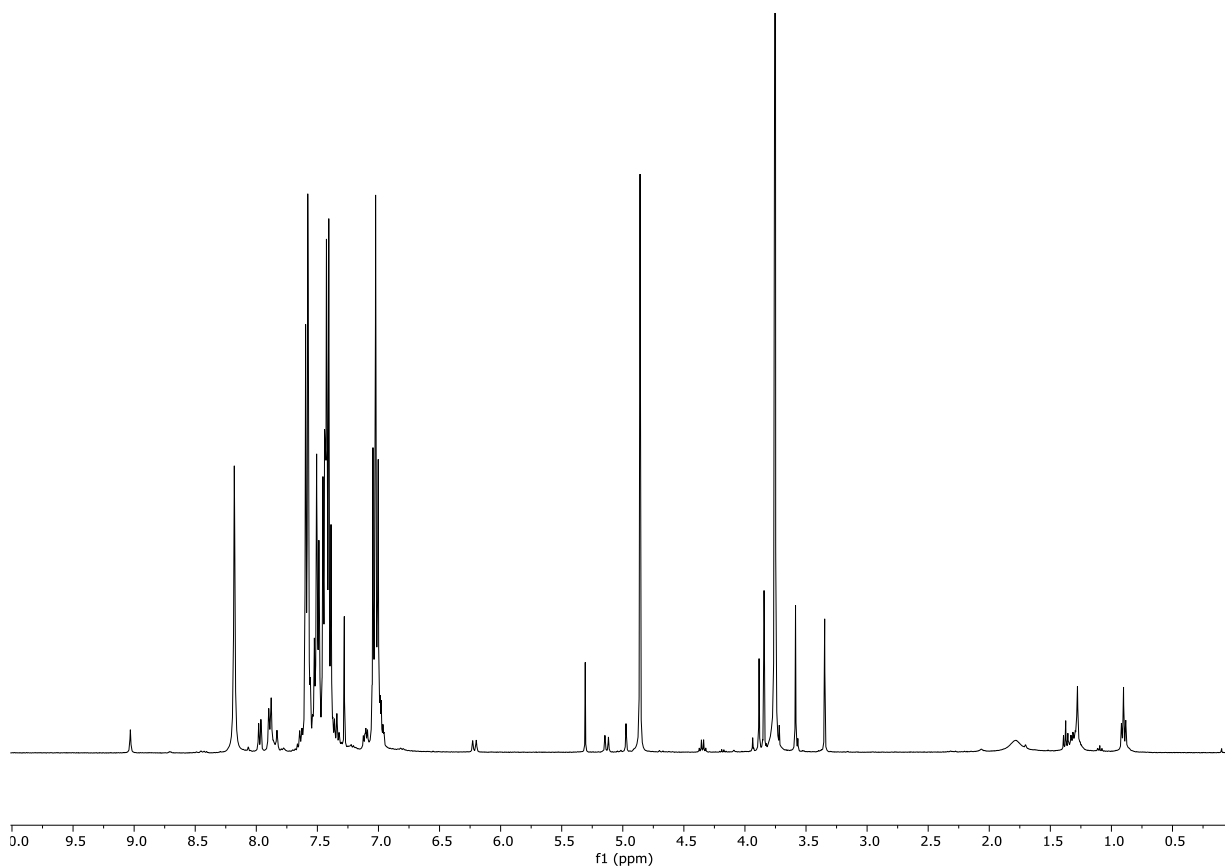

<sup>1</sup>H NMR spectrum (CDCl<sub>3</sub>, 300.13 MHz) of crude of **2e**

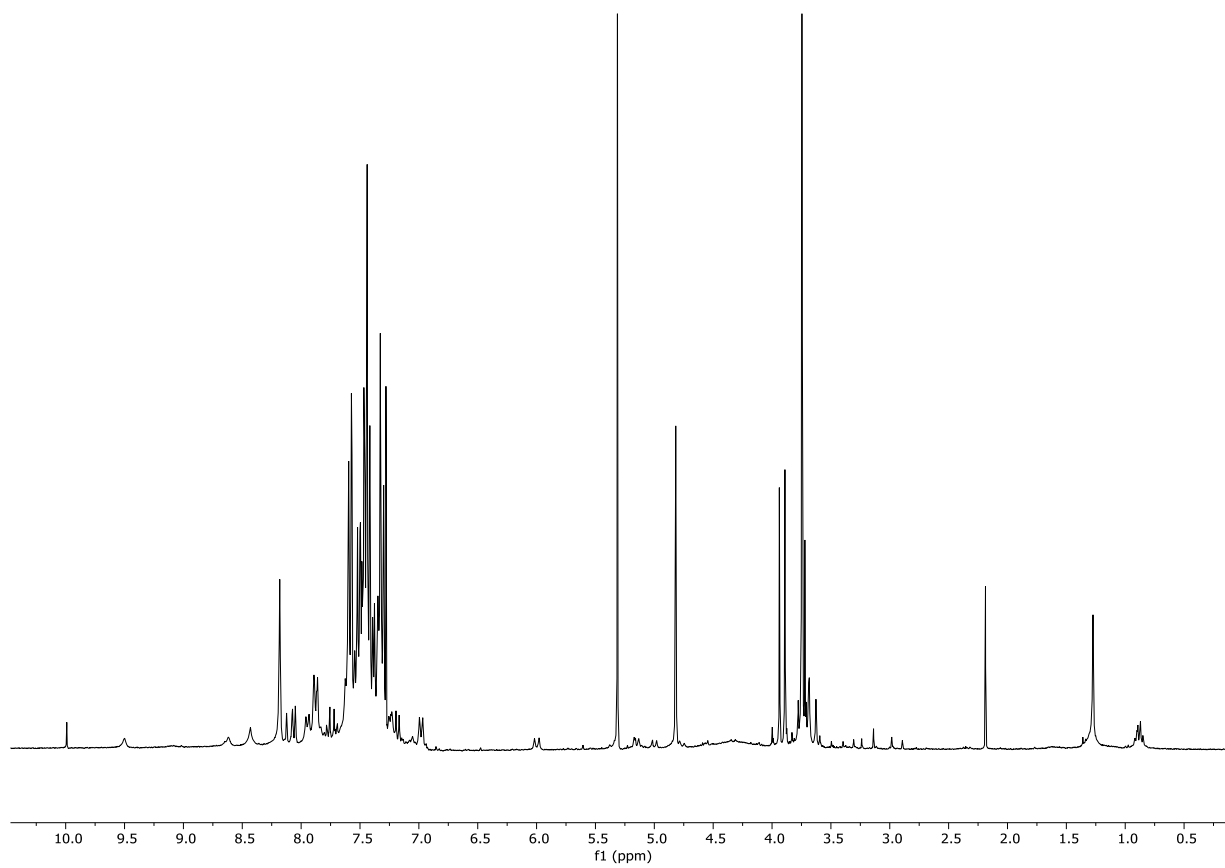

<sup>1</sup>H NMR spectrum (CDCl<sub>3</sub>, 300.13 MHz) of crude of **2f**

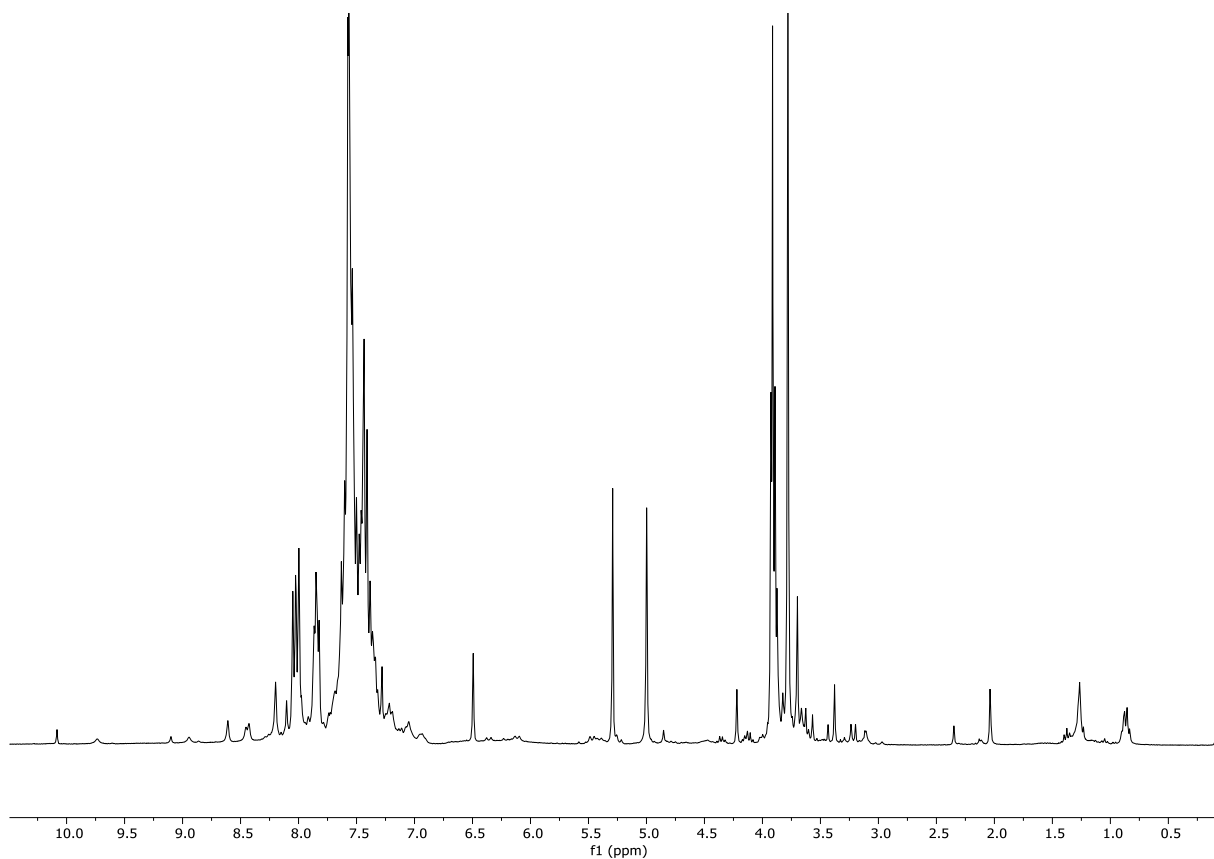

$^1\text{H}$  NMR spectrum ( $\text{CDCl}_3$ , 300.13 MHz) of crude of **2g**

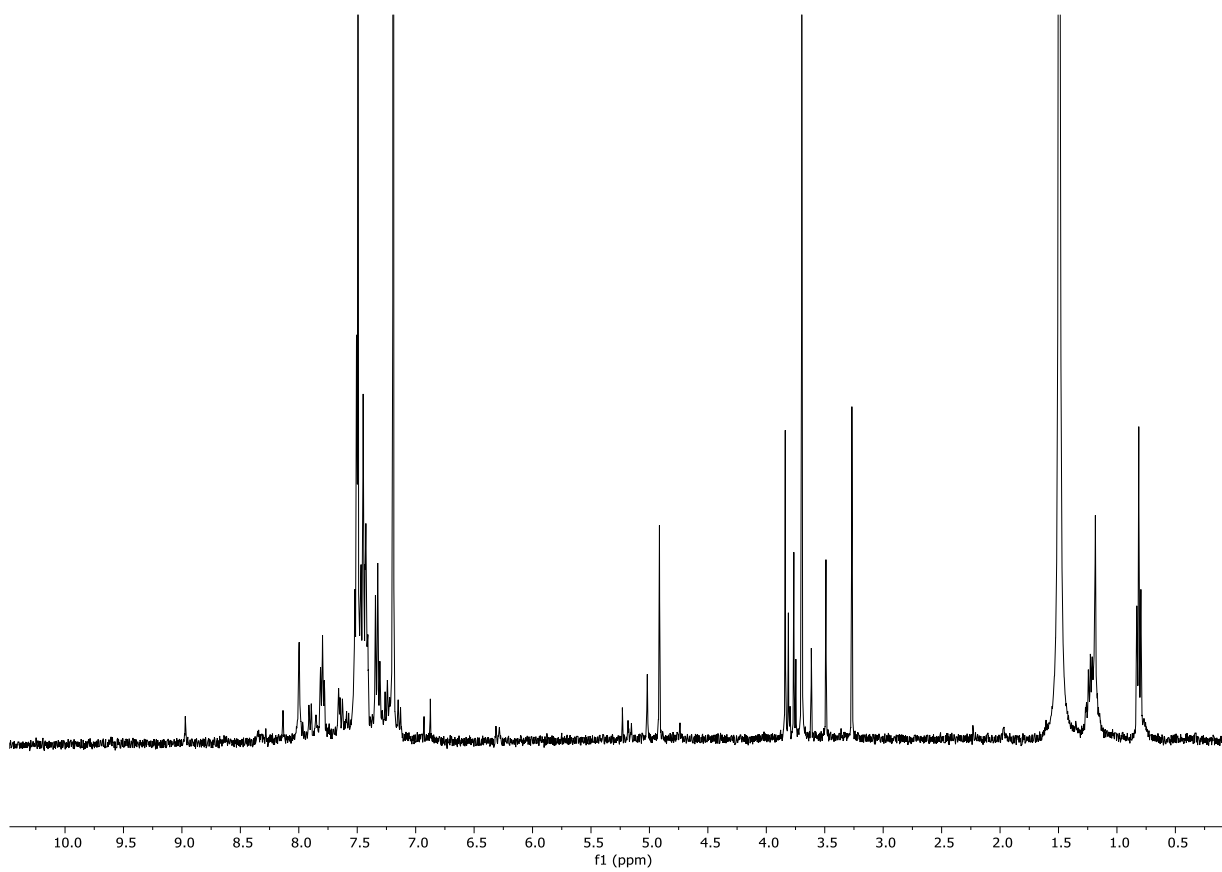

$^1\text{H}$  NMR spectrum ( $\text{CDCl}_3$ , 300.13 MHz) of crude of **2h**

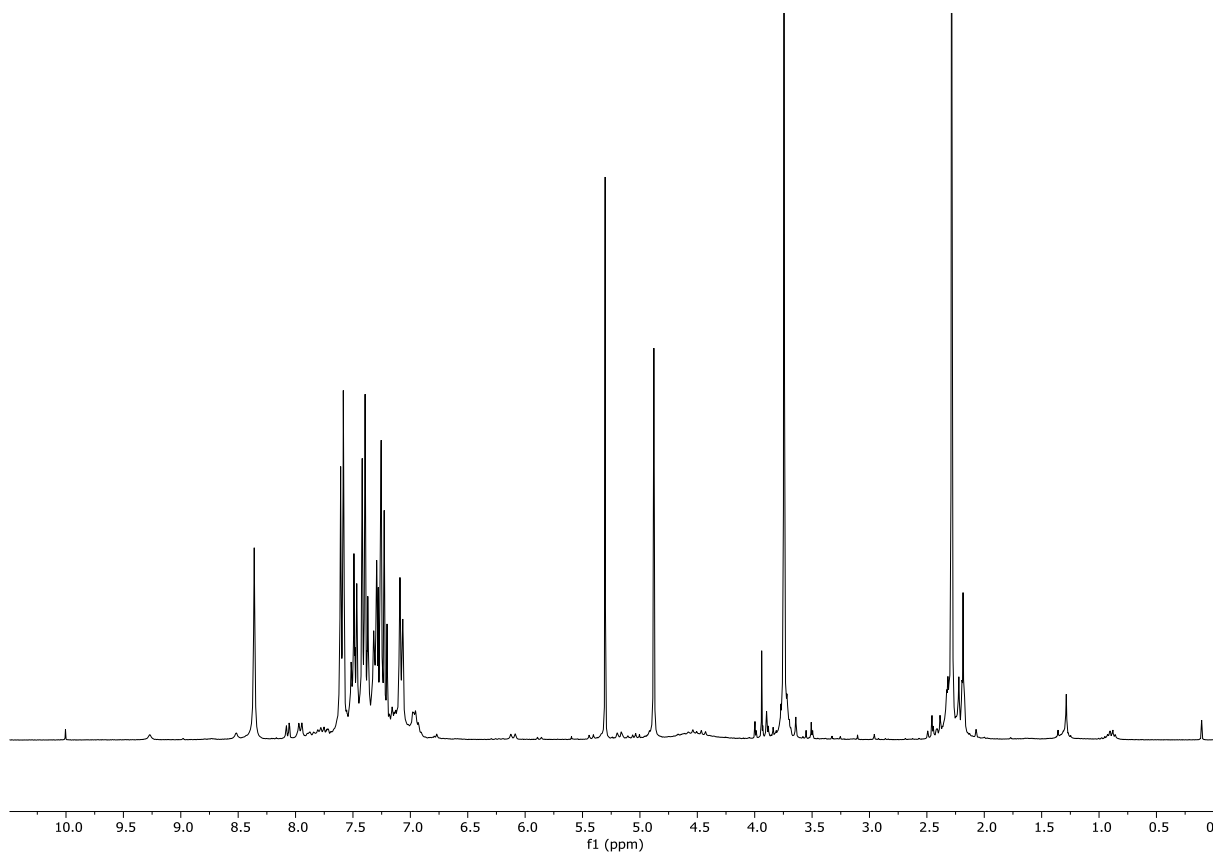

<sup>1</sup>H NMR spectrum (CDCl<sub>3</sub>, 300.13 MHz) of crude of **2i**

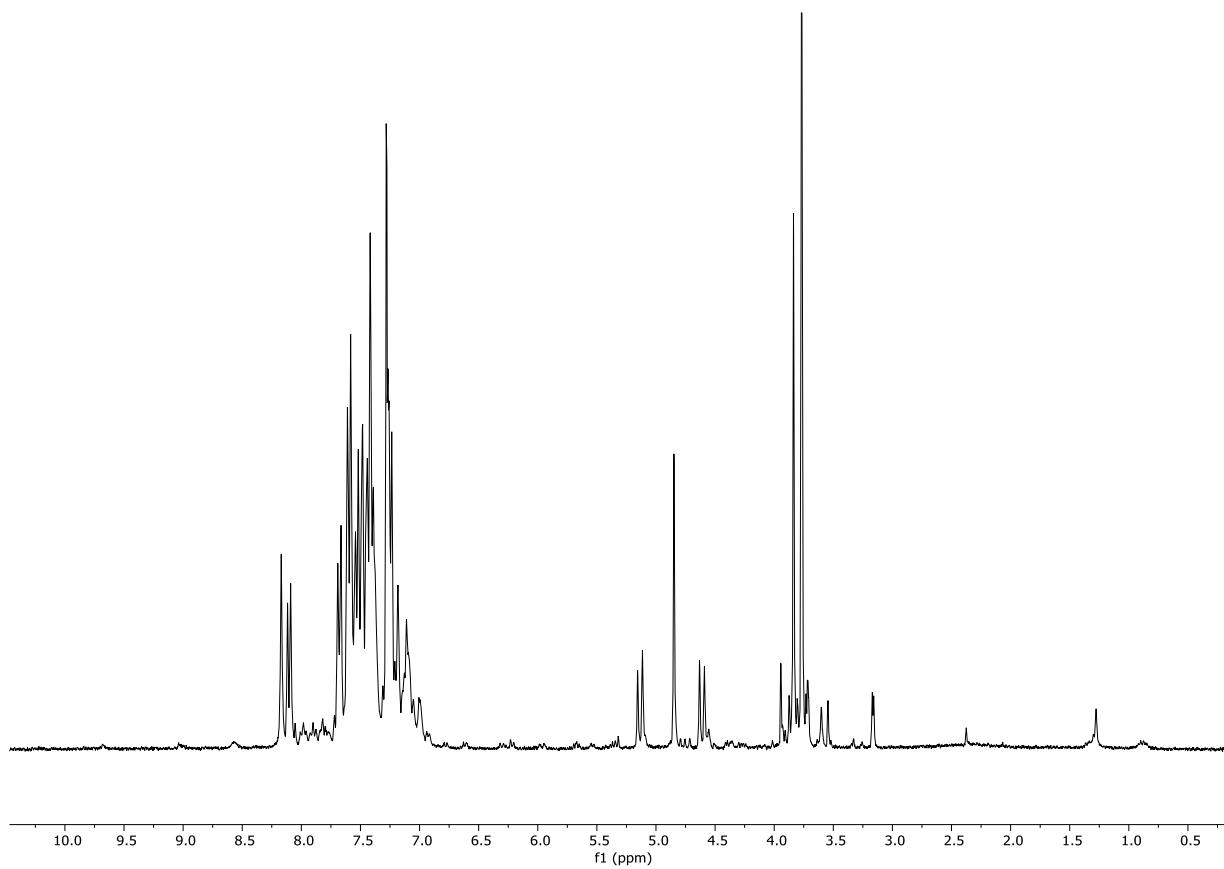

<sup>1</sup>H NMR spectrum (CDCl<sub>3</sub>, 300.13 MHz) of crude of **2j**

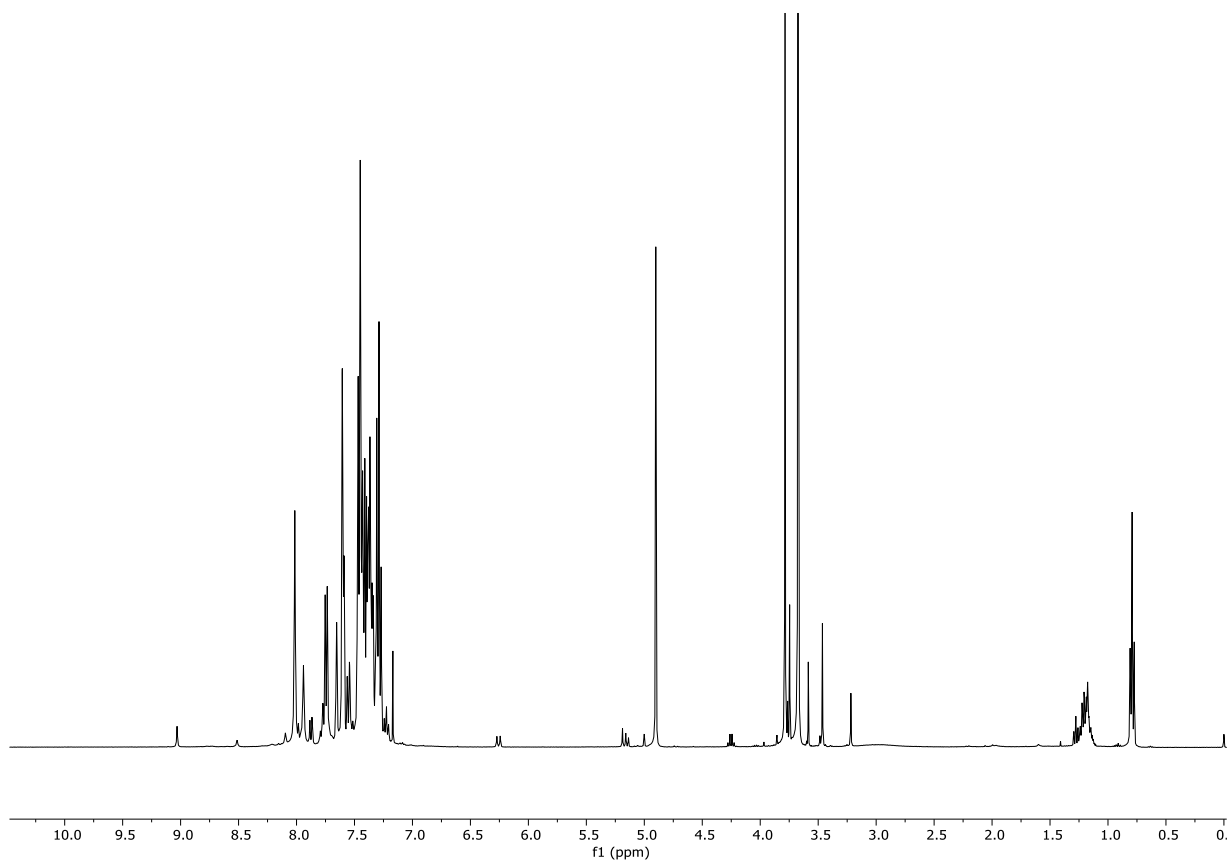

<sup>1</sup>H NMR spectrum (CDCl<sub>3</sub>, 300.13 MHz) of crude of **2k**

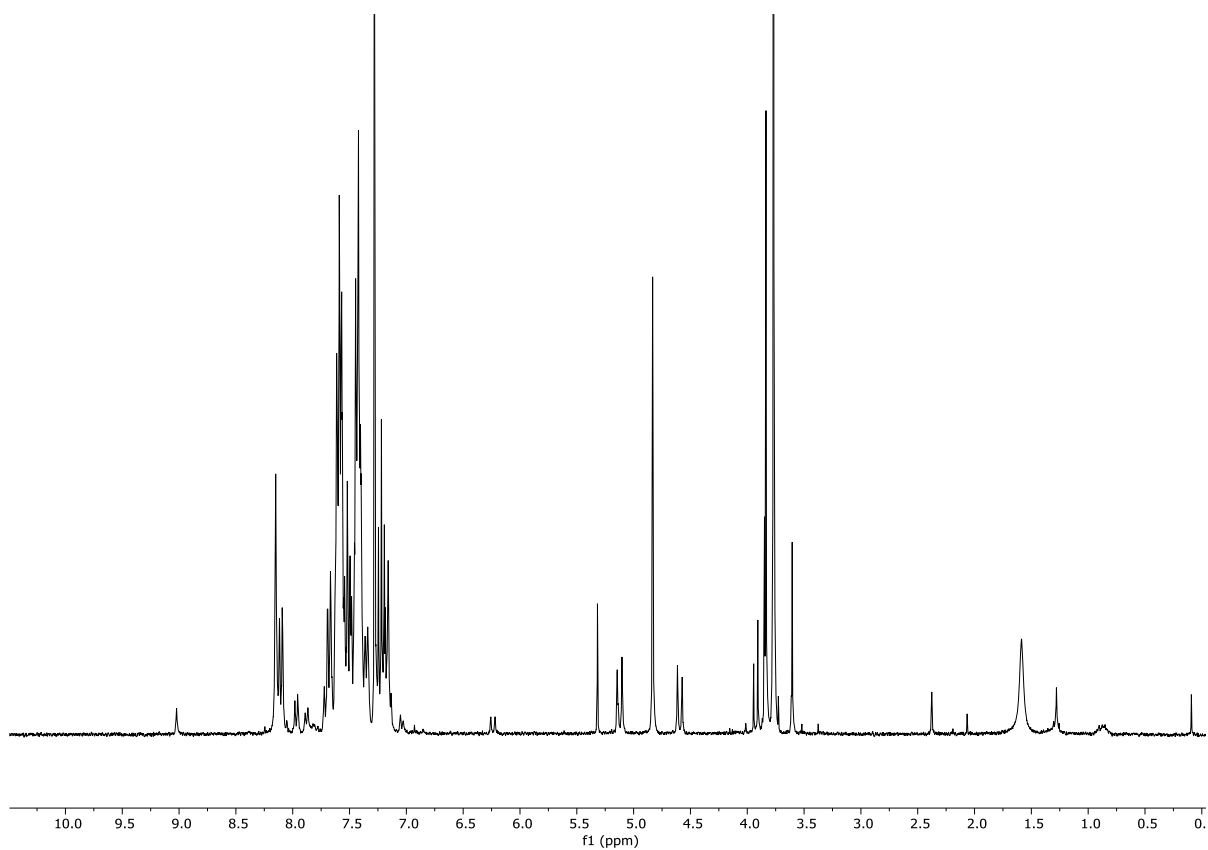

<sup>1</sup>H NMR spectrum (CDCl<sub>3</sub>, 300.13 MHz) of crude of **2l**

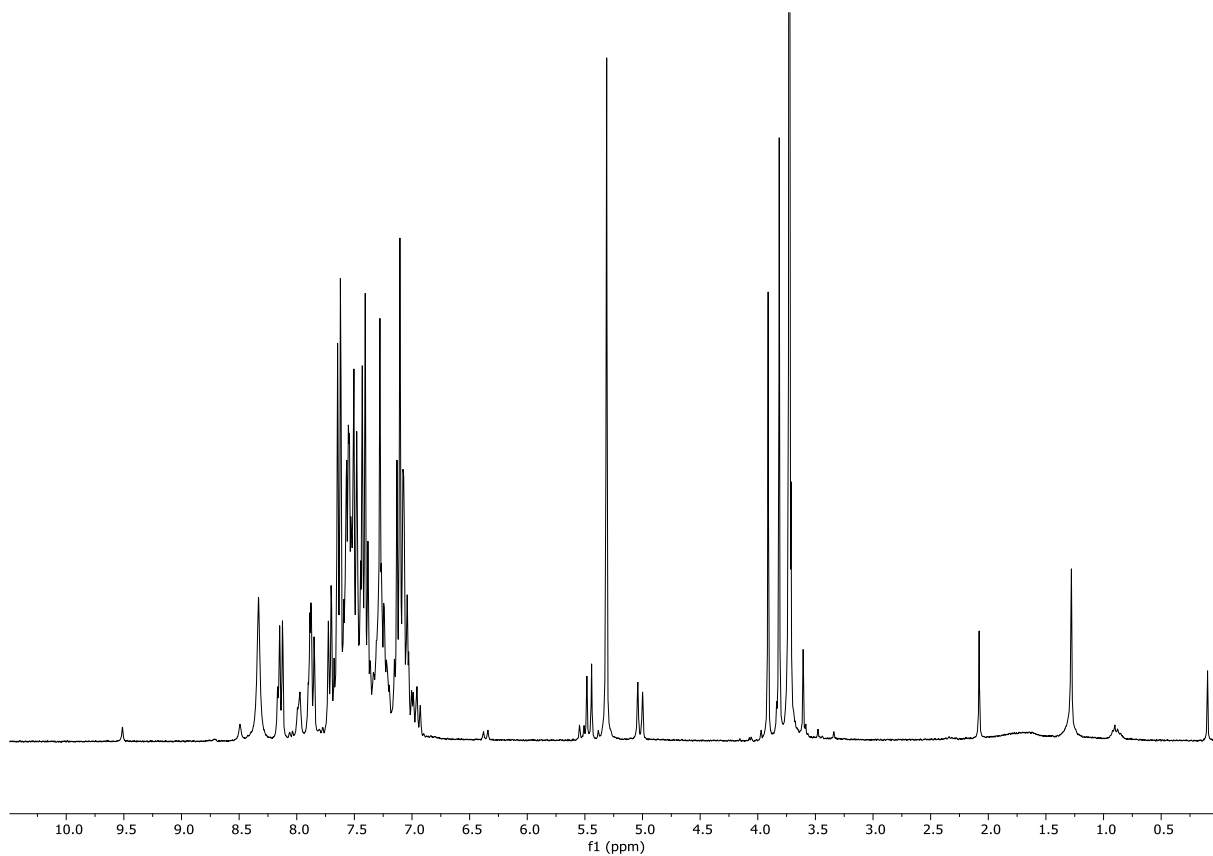

<sup>1</sup>H NMR spectrum (CDCl<sub>3</sub>, 300.13 MHz) of crude of **2o**

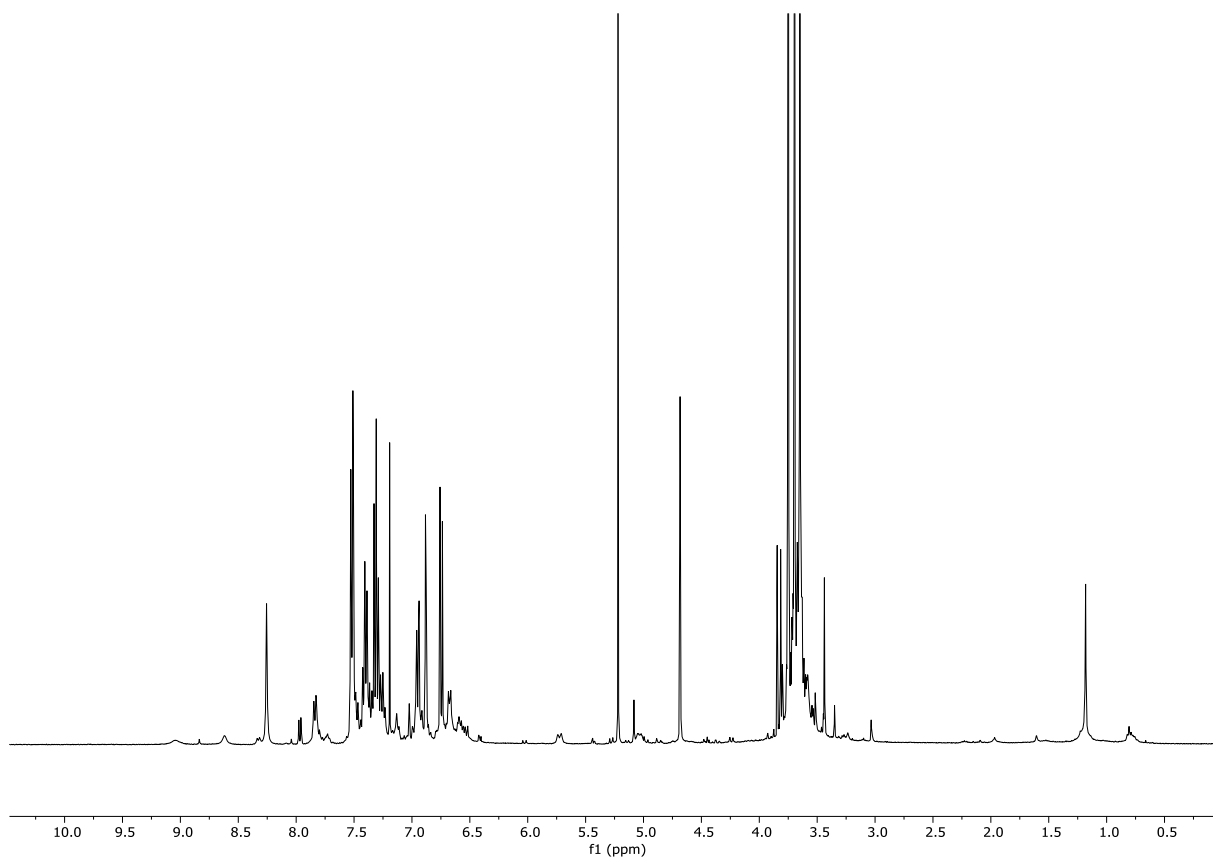

<sup>1</sup>H NMR spectrum (CDCl<sub>3</sub>, 300.13 MHz) of crude of **2p**

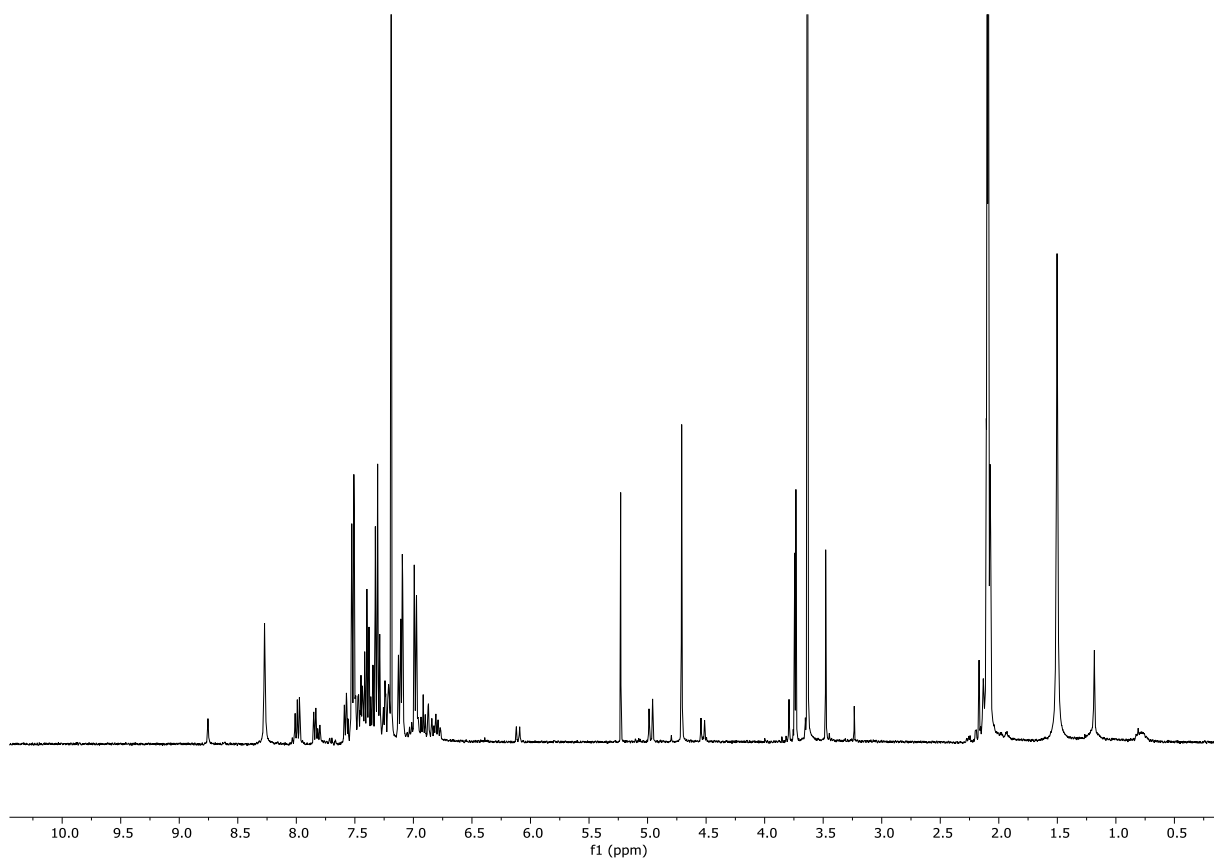

<sup>1</sup>H NMR spectrum (CDCl<sub>3</sub>, 300.13 MHz) of crude of **2q**

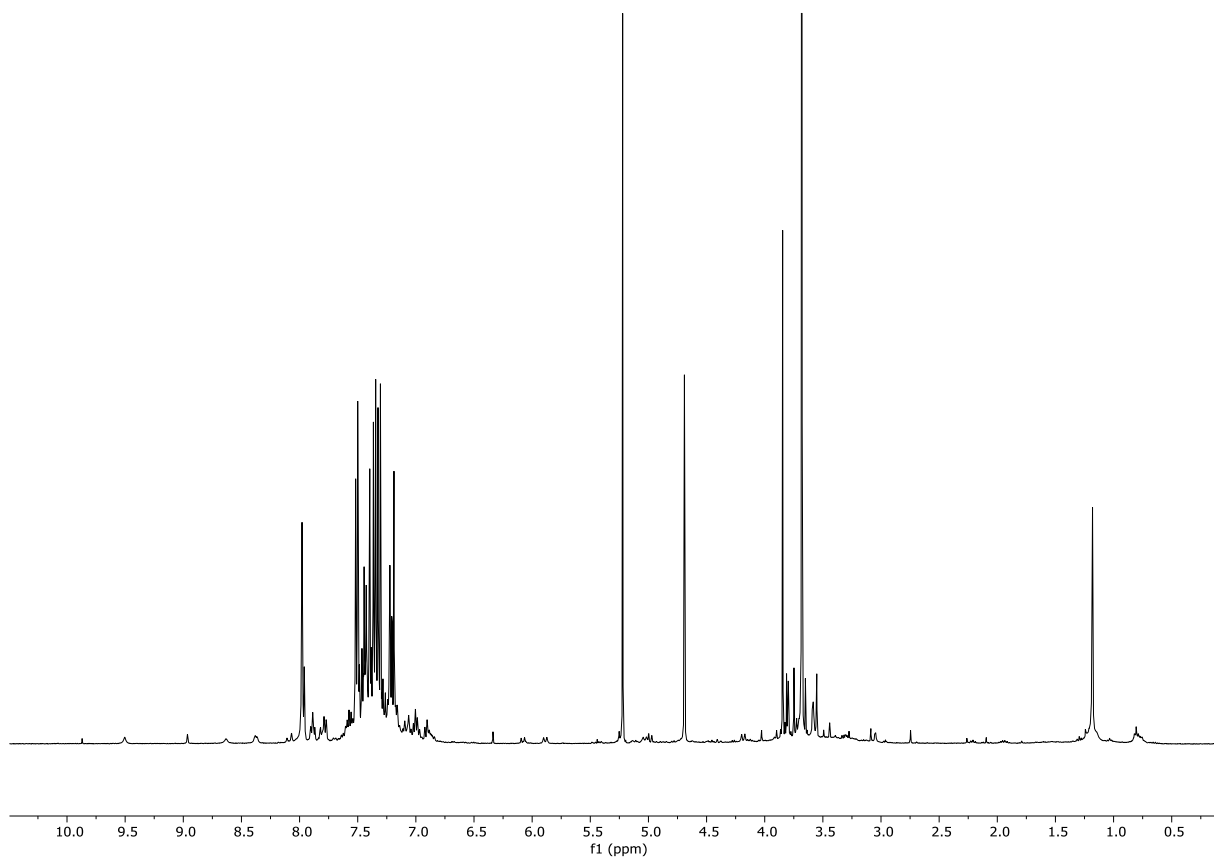

<sup>1</sup>H NMR spectrum (CDCl<sub>3</sub>, 300.13 MHz) of crude of **2r**



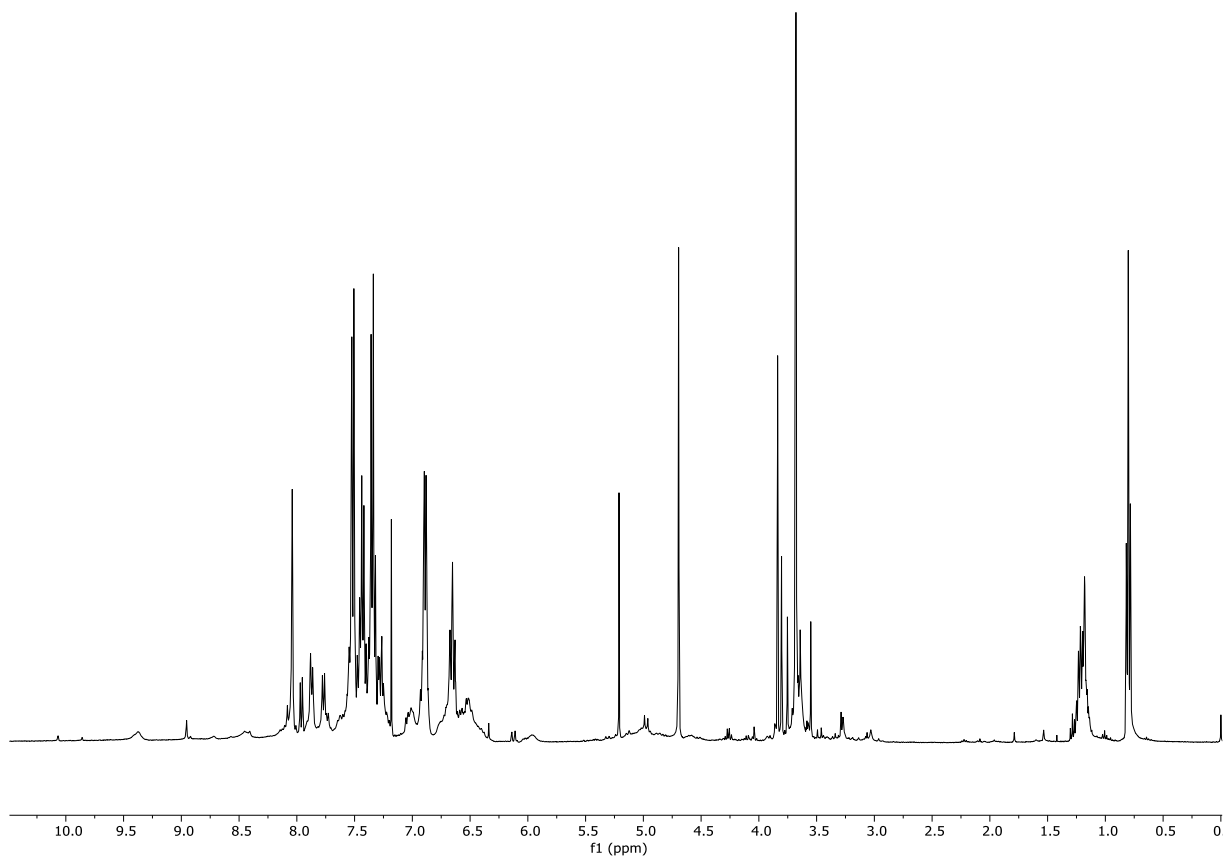

<sup>1</sup>H NMR spectrum (CDCl<sub>3</sub>, 300.13 MHz) of crude of **2s**

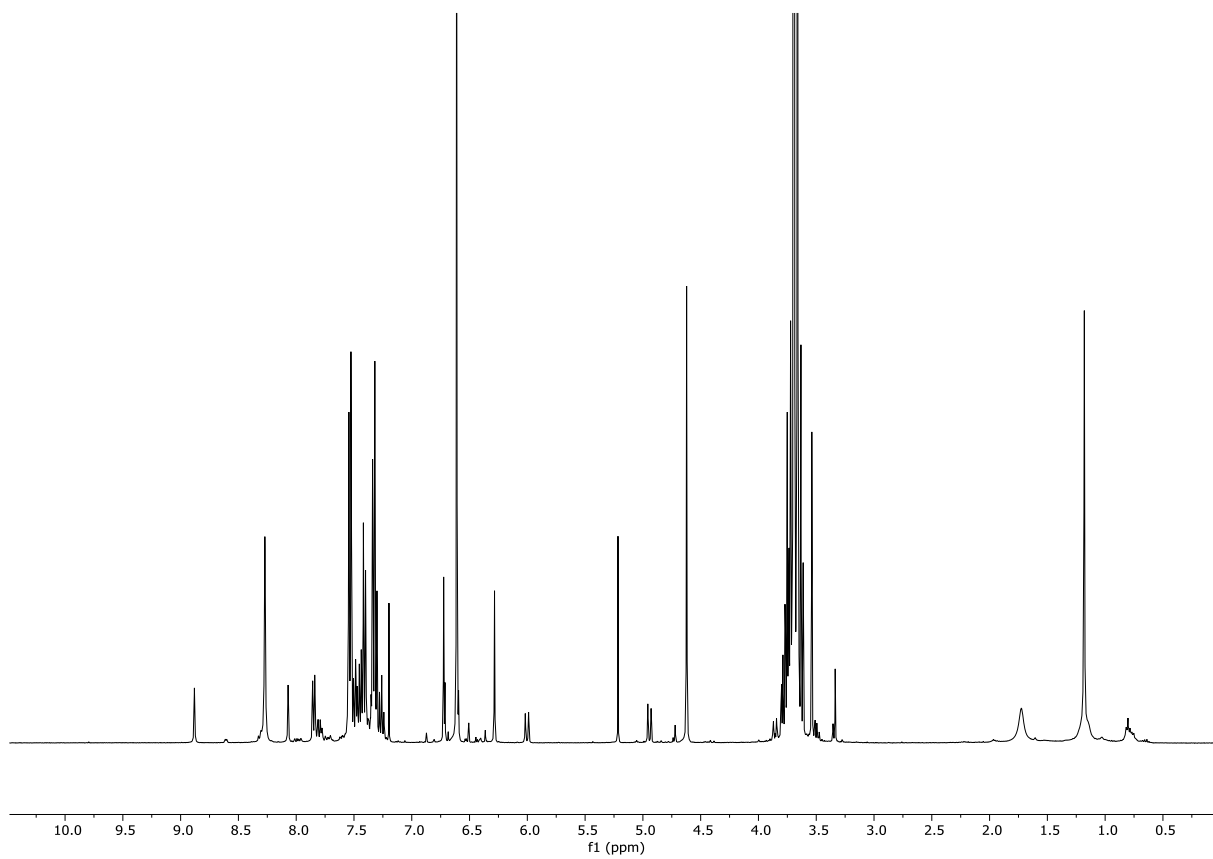

<sup>1</sup>H NMR spectrum (CDCl<sub>3</sub>, 300.13 MHz) of crude of **2t**

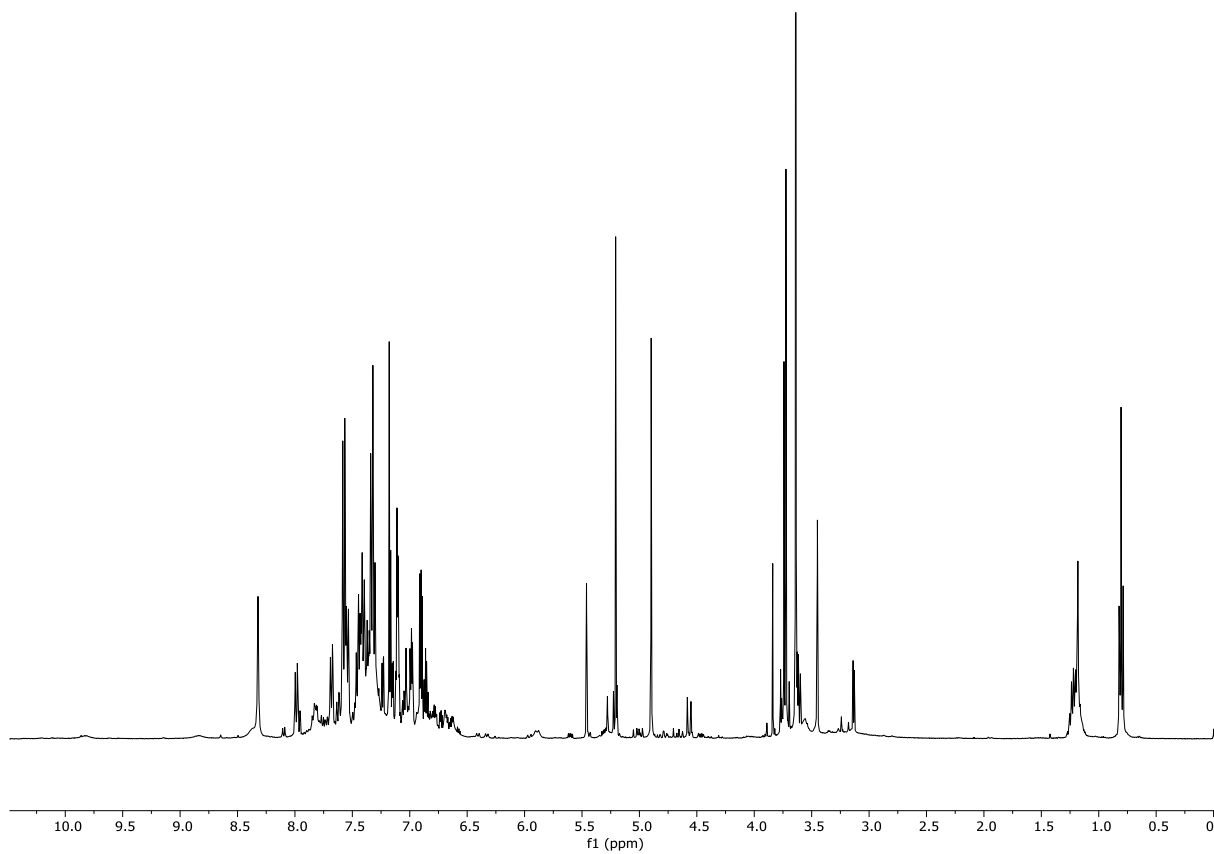

$^1\text{H}$  NMR spectrum ( $\text{CDCl}_3$ , 300.13 MHz) of crude of **2u**

## 6.- Copies of NMR spectra of the pyrrolidine derivatives 3a-3r

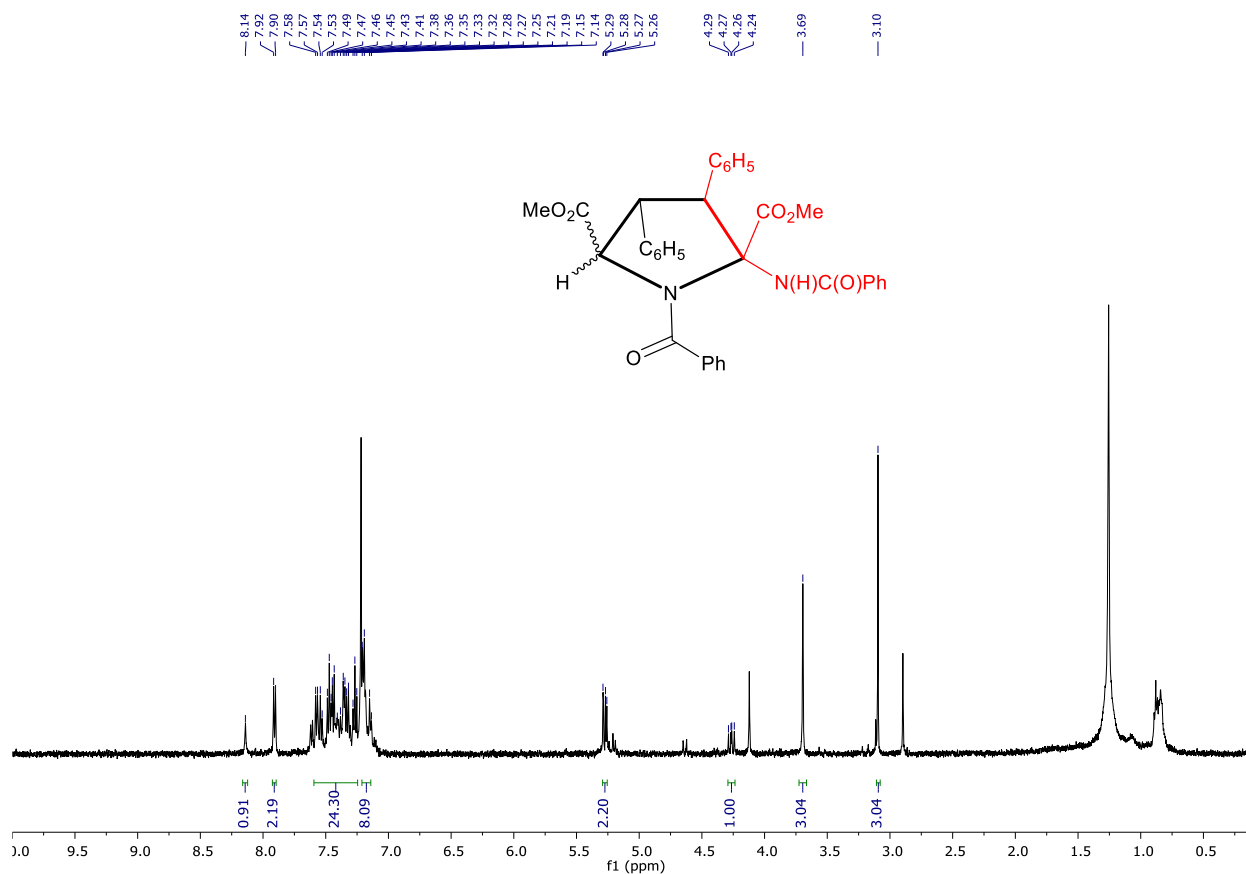

<sup>1</sup>H NMR spectrum (CDCl<sub>3</sub>, 300.13 MHz) of **3a** (mixture of diastereomers)

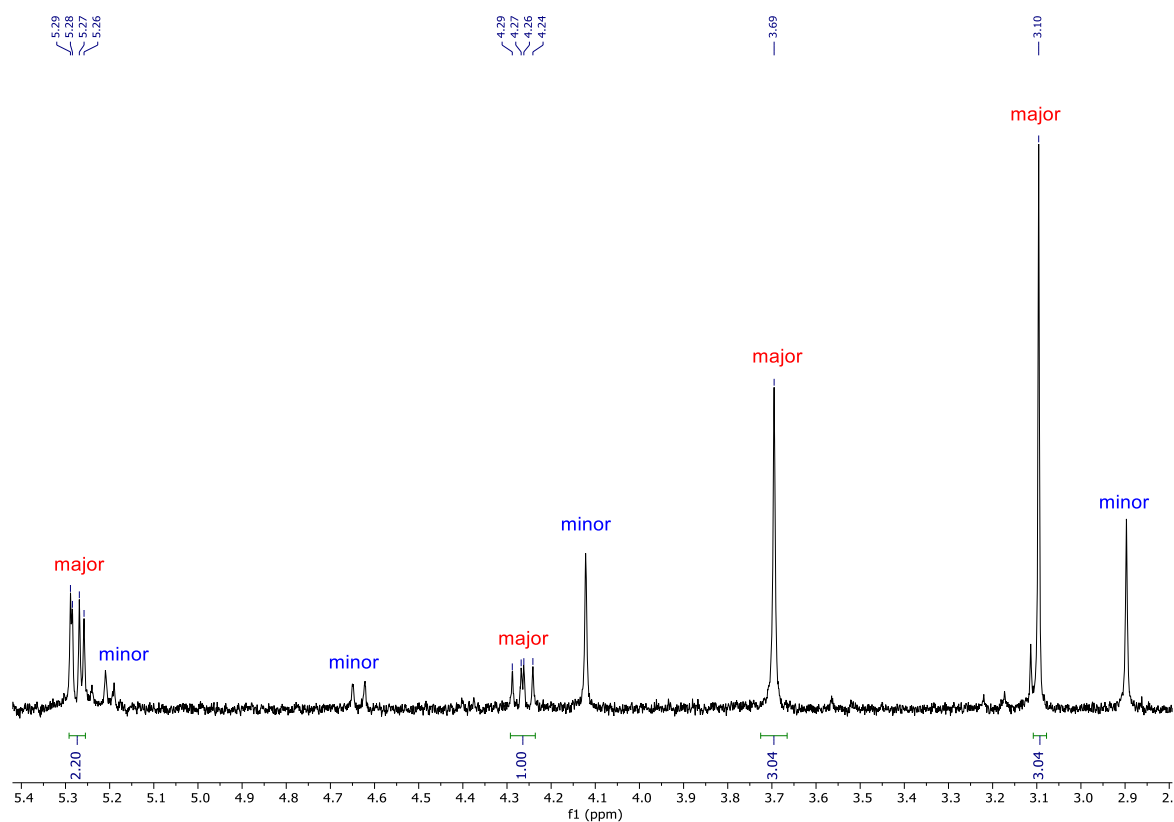

<sup>1</sup>H NMR spectrum (CDCl<sub>3</sub>, 300.13 MHz) of **3a** (mixture of diastereomers, zoom aliphatic part)

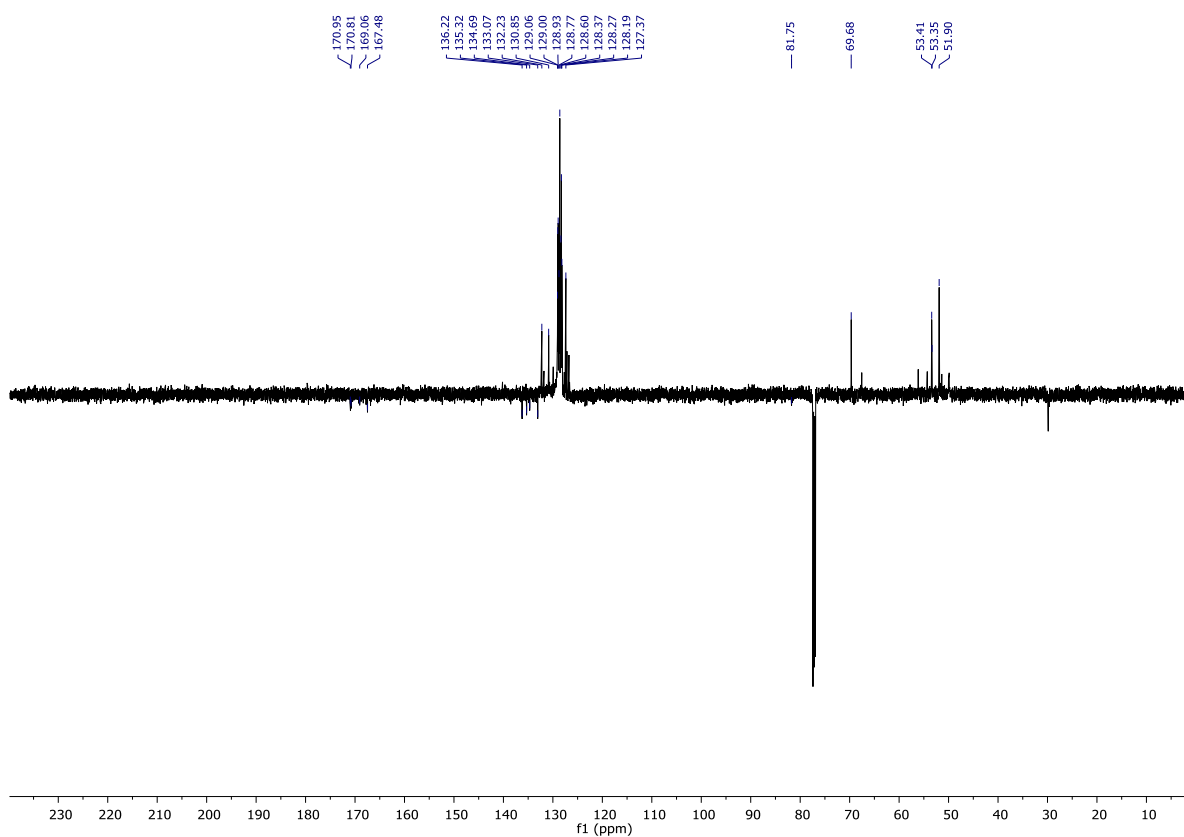

$^{13}\text{C}\{^1\text{H}\}$  (APT) NMR spectrum ( $\text{CDCl}_3$ , 75.5 MHz) of **3a** (mixture of diastereomers)

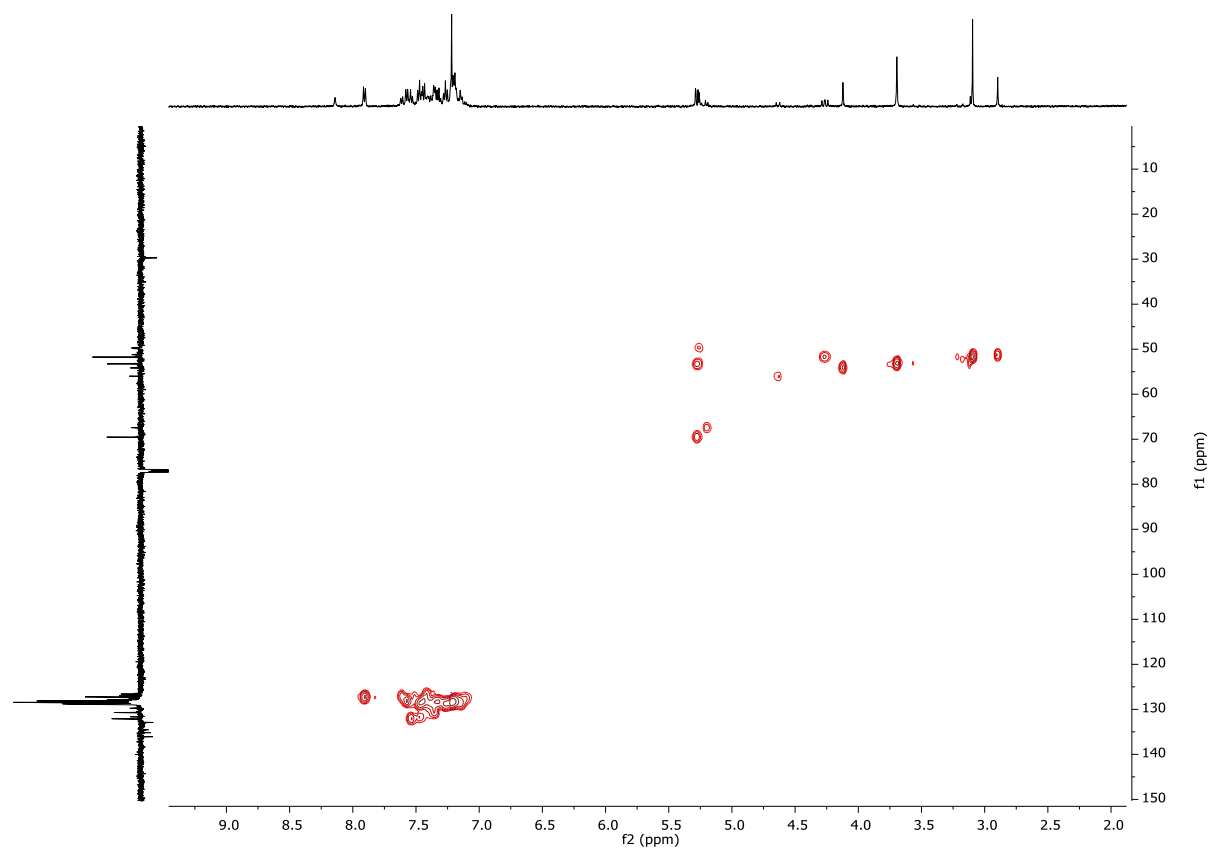

$^1\text{H}$ - $^{13}\text{C}$  HSQC ( $\text{CDCl}_3$ ) correlation spectrum of **3a** (mixture of diastereomers)

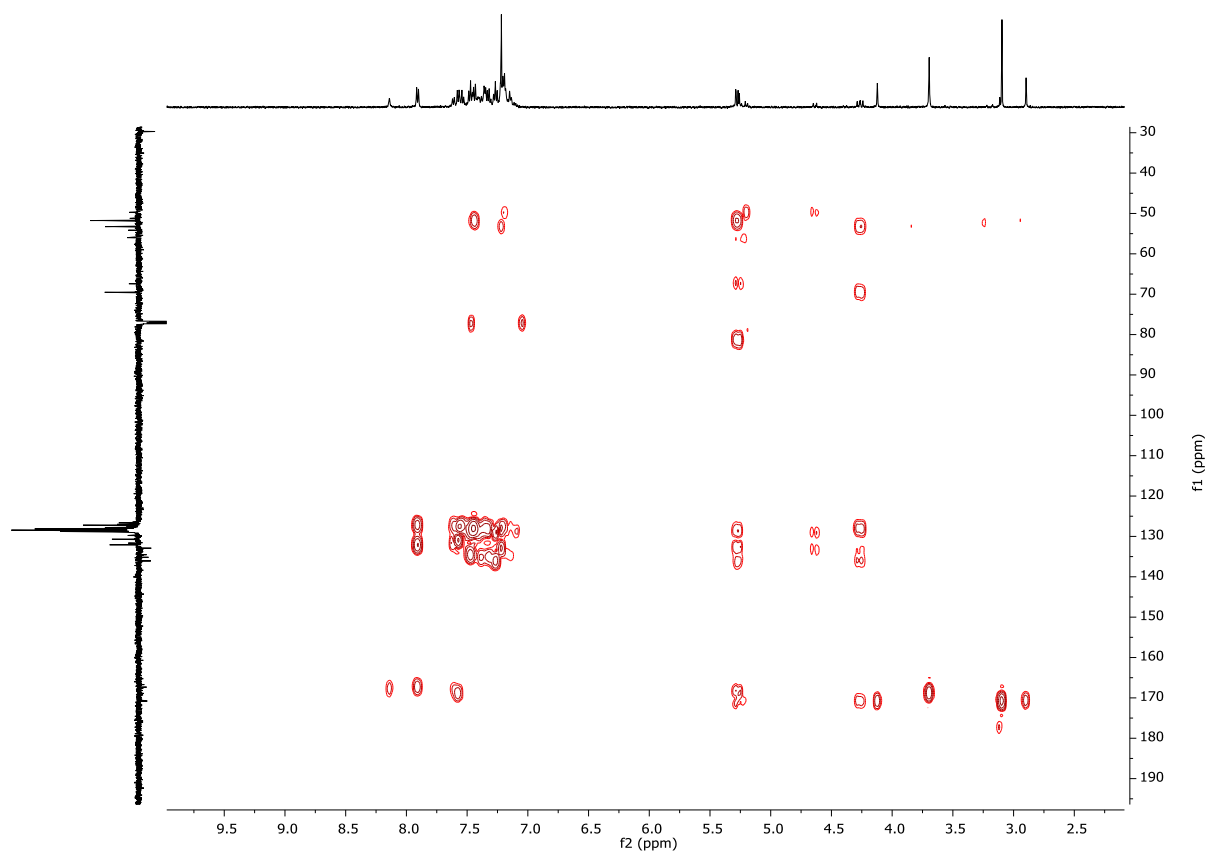

$^1\text{H}$ - $^{13}\text{C}$  HMBC ( $\text{CDCl}_3$ ) correlation spectrum of **3a** (mixture of diastereomers)

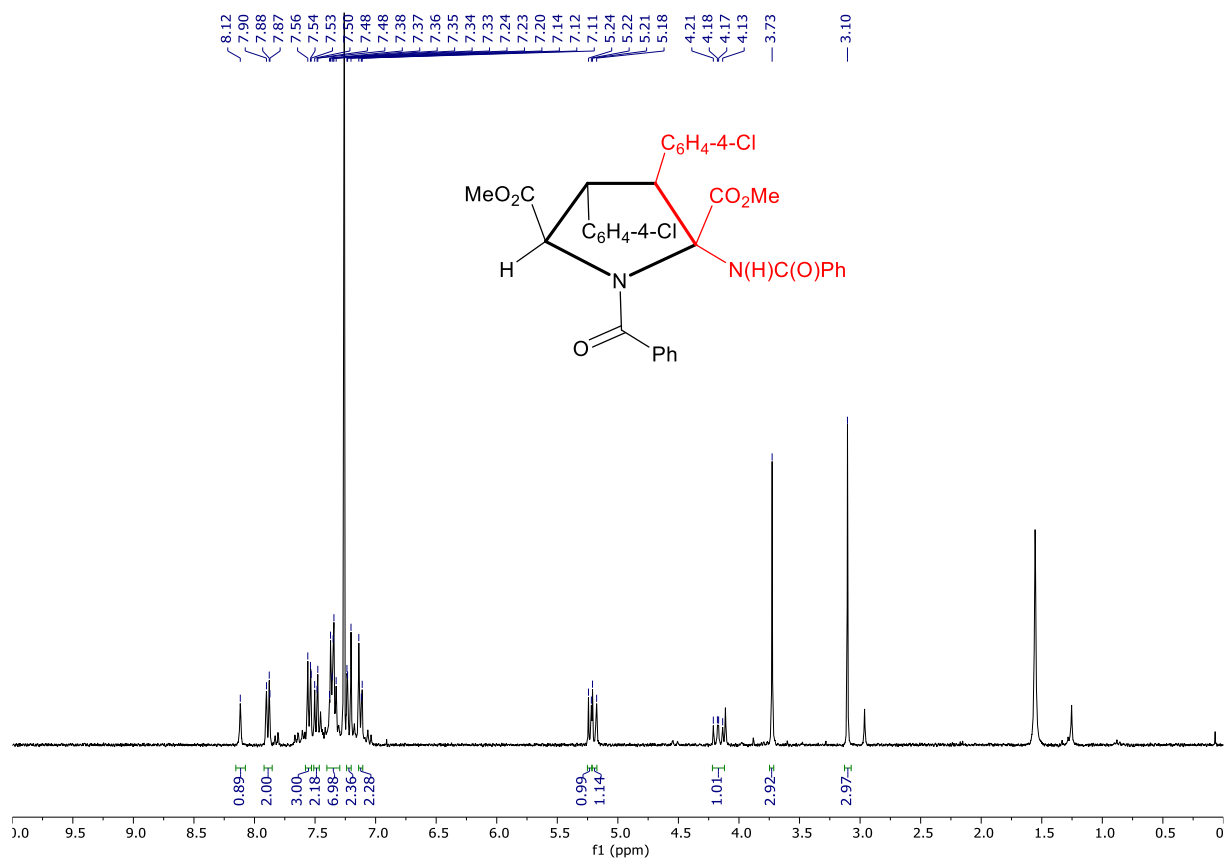

$^1\text{H}$  NMR spectrum ( $\text{CDCl}_3$ , 300.13 MHz) of **3d**

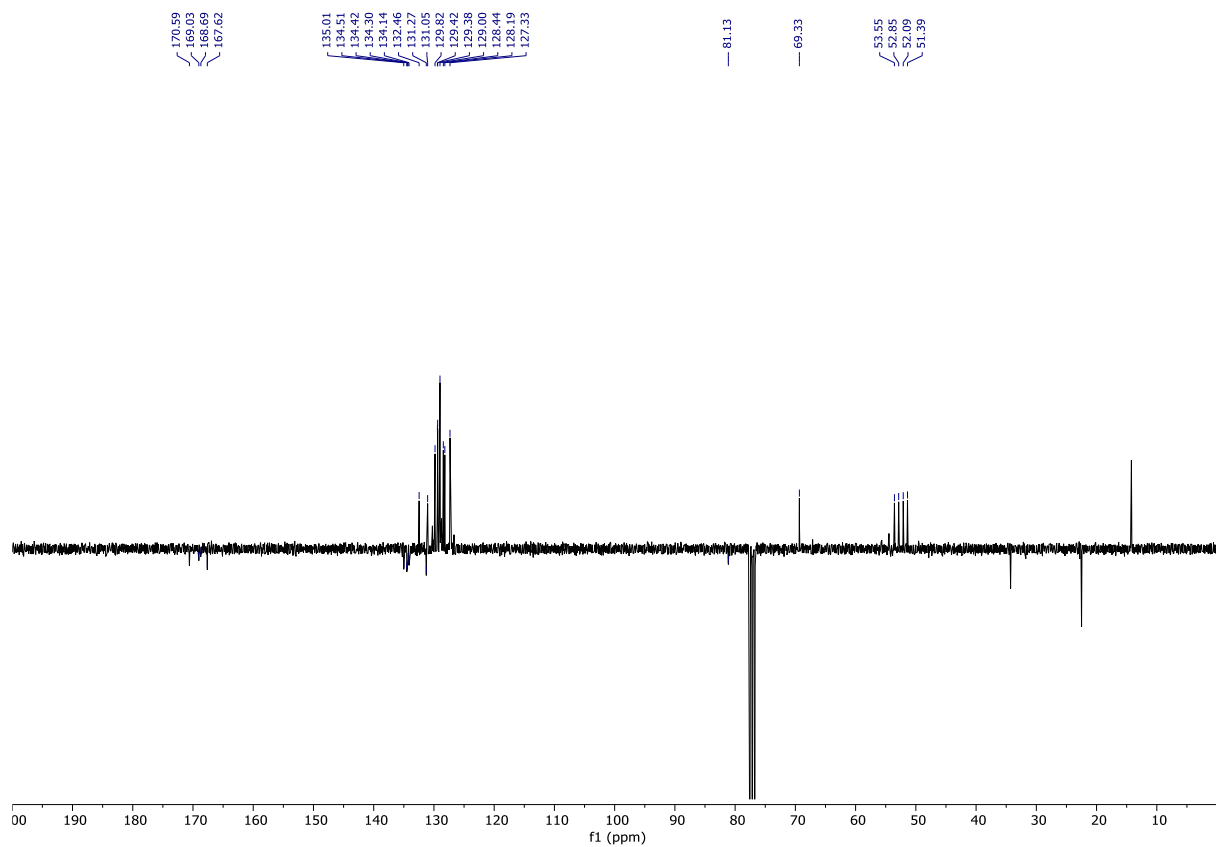

$^{13}\text{C}\{^1\text{H}\}$  (APT) NMR spectrum ( $\text{CDCl}_3$ , 75.5 MHz) of **3d**

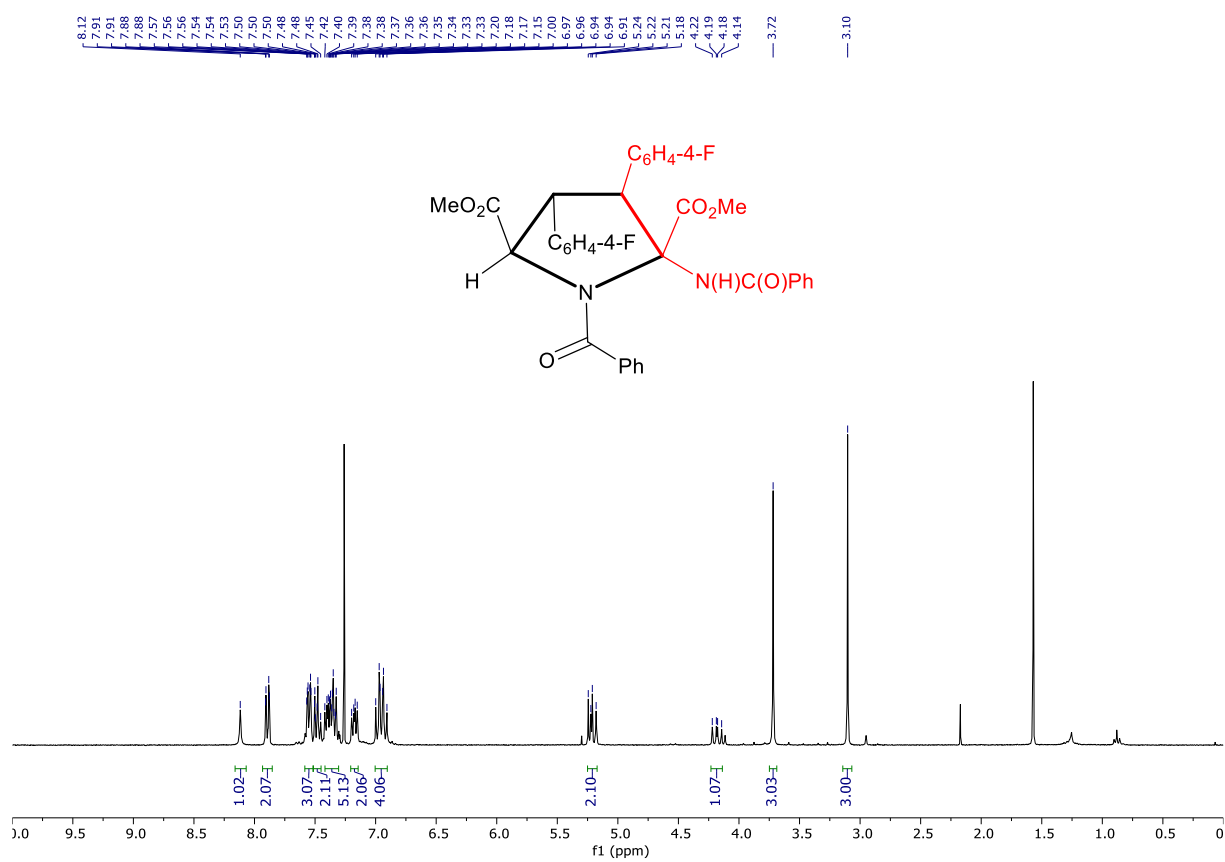

$^1\text{H}$  NMR spectrum ( $\text{CDCl}_3$ , 300.13 MHz) of **3e**

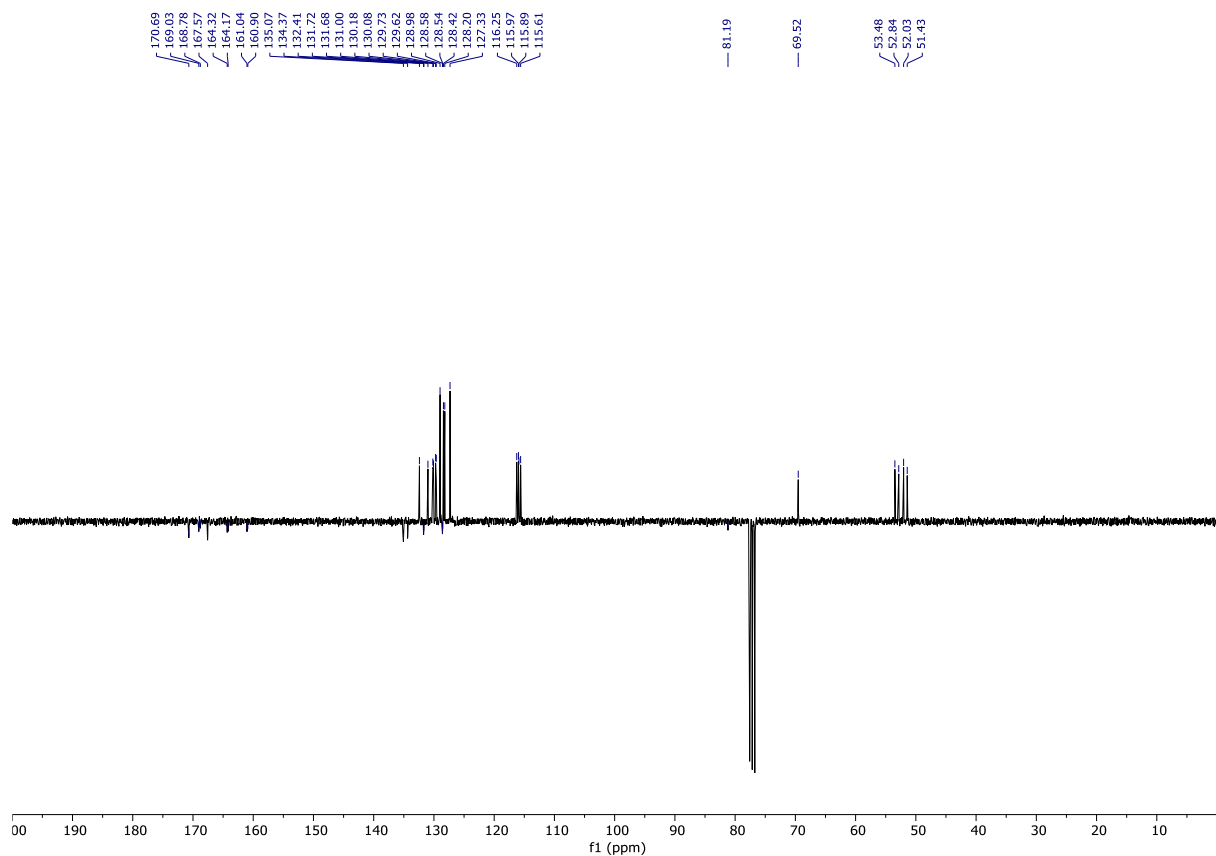

$^{13}\text{C}\{^1\text{H}\}$  (APT) NMR spectrum ( $\text{CDCl}_3$ , 75.5 MHz) of **3e**

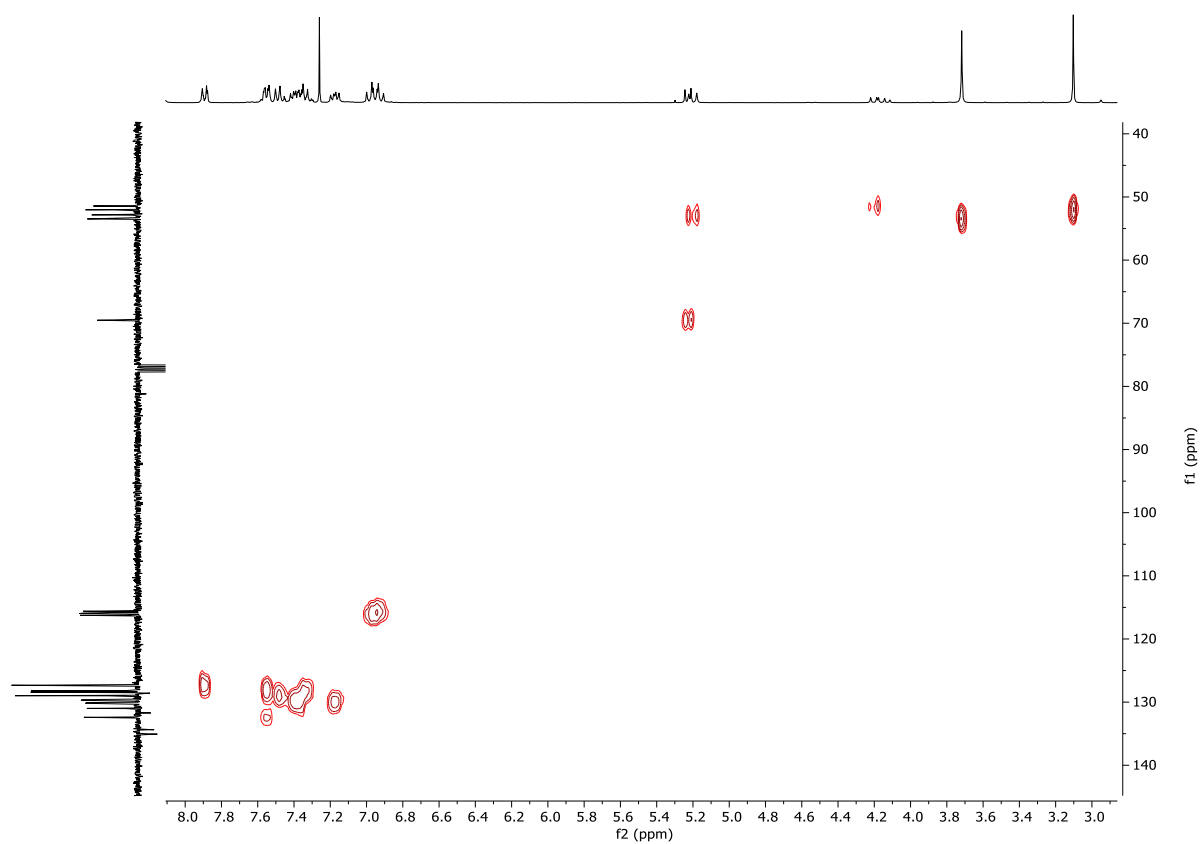

$^1\text{H}$ - $^{13}\text{C}$  HSQC ( $\text{CDCl}_3$ ) correlation spectrum of **3e**

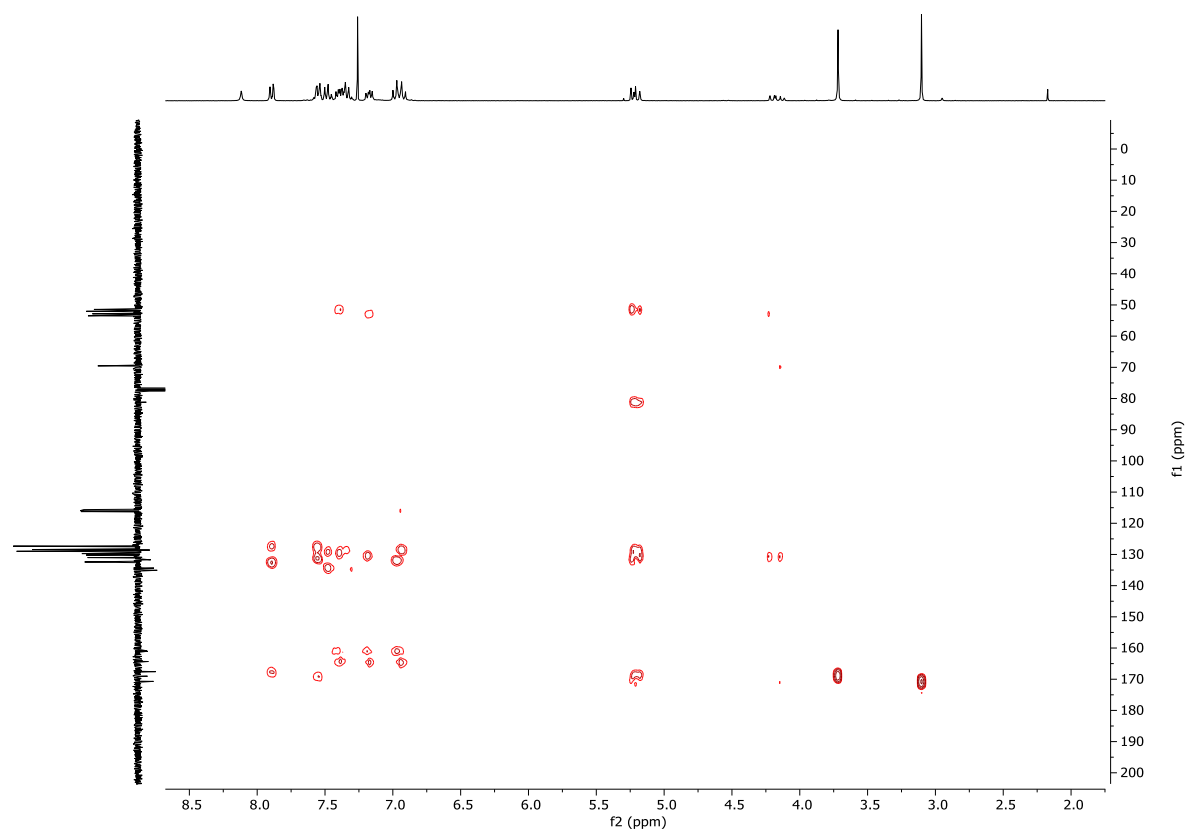

$^1\text{H}$ - $^{13}\text{C}$  HMBC ( $\text{CDCl}_3$ ) correlation spectrum of **3e**

$^{13}\text{C}$  chemical shifts (ppm):  
 -113.42, -113.44, -113.45, -113.47, -113.49, -113.50, -113.51, -113.81, -113.83, -113.84, -113.86, -113.88, -113.89, -113.91

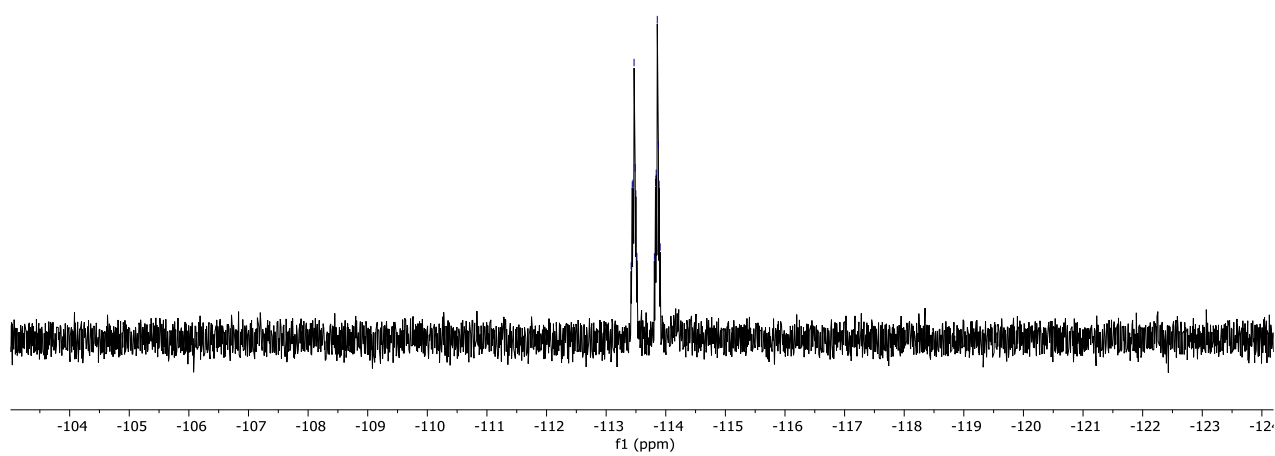

$^{19}\text{F}$  NMR spectrum ( $\text{CDCl}_3$ , 282.4 MHz) of **3e**



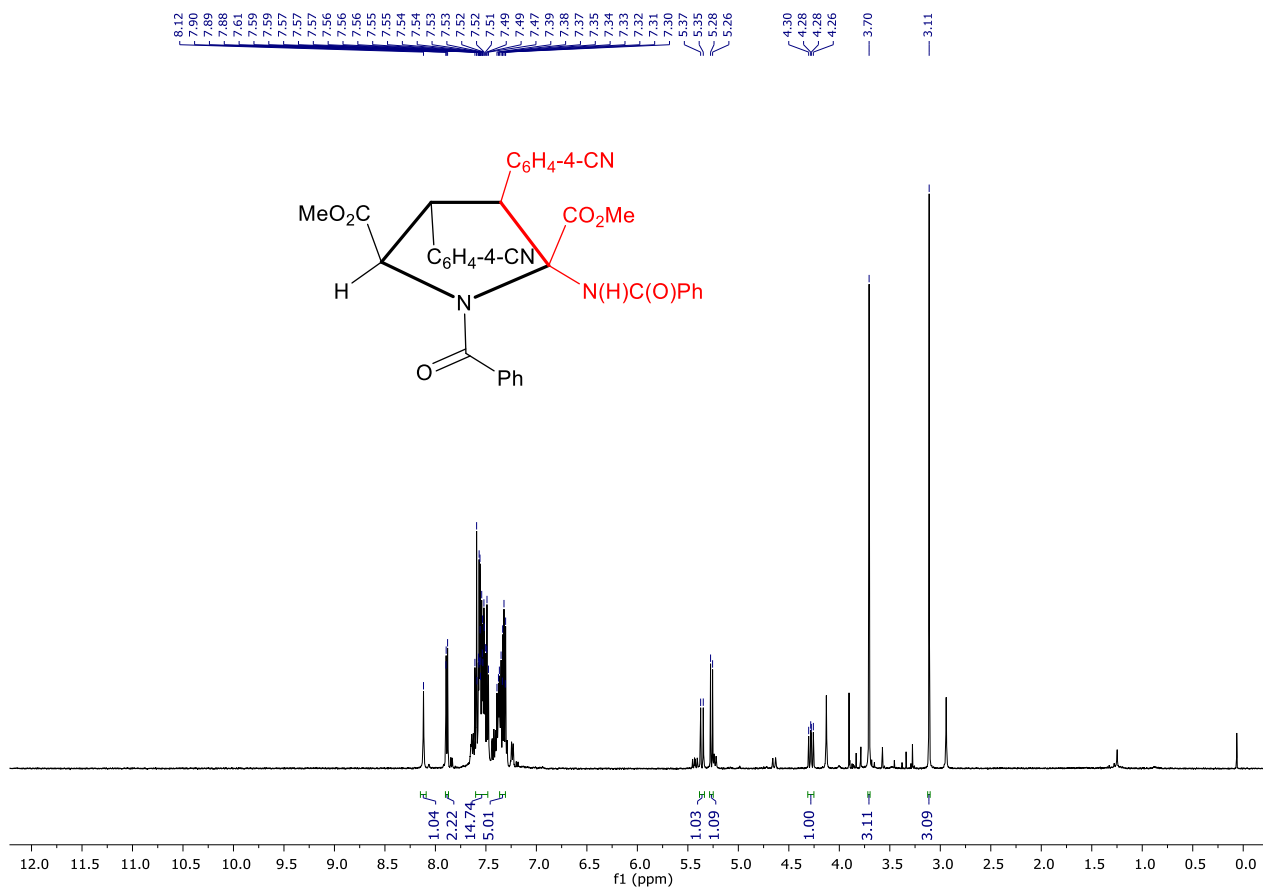

<sup>1</sup>H NMR spectrum (CDCl<sub>3</sub>, 400.13 MHz) of **3g** (mixture of diastereomers)

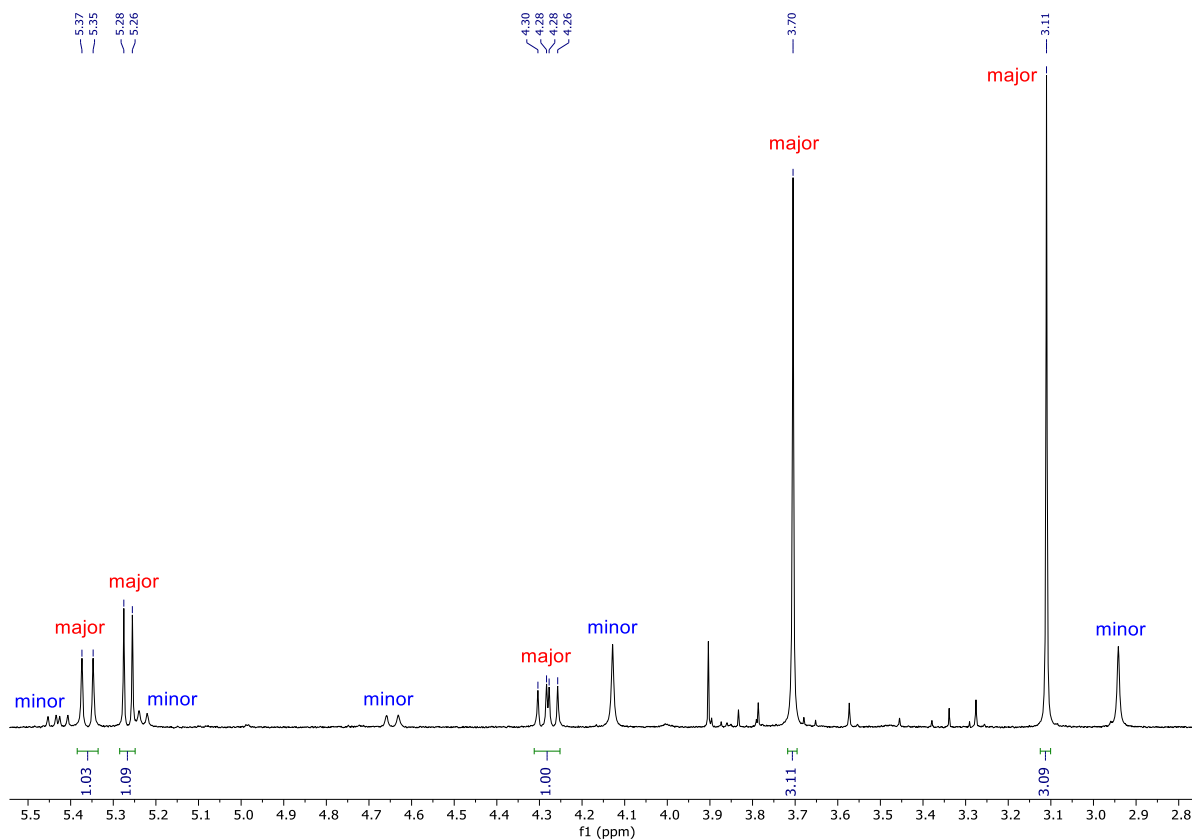

<sup>1</sup>H NMR spectrum (CDCl<sub>3</sub>, 400.13 MHz) of **3g** (mixture of diastereomers, zoom of the aliphatic part)

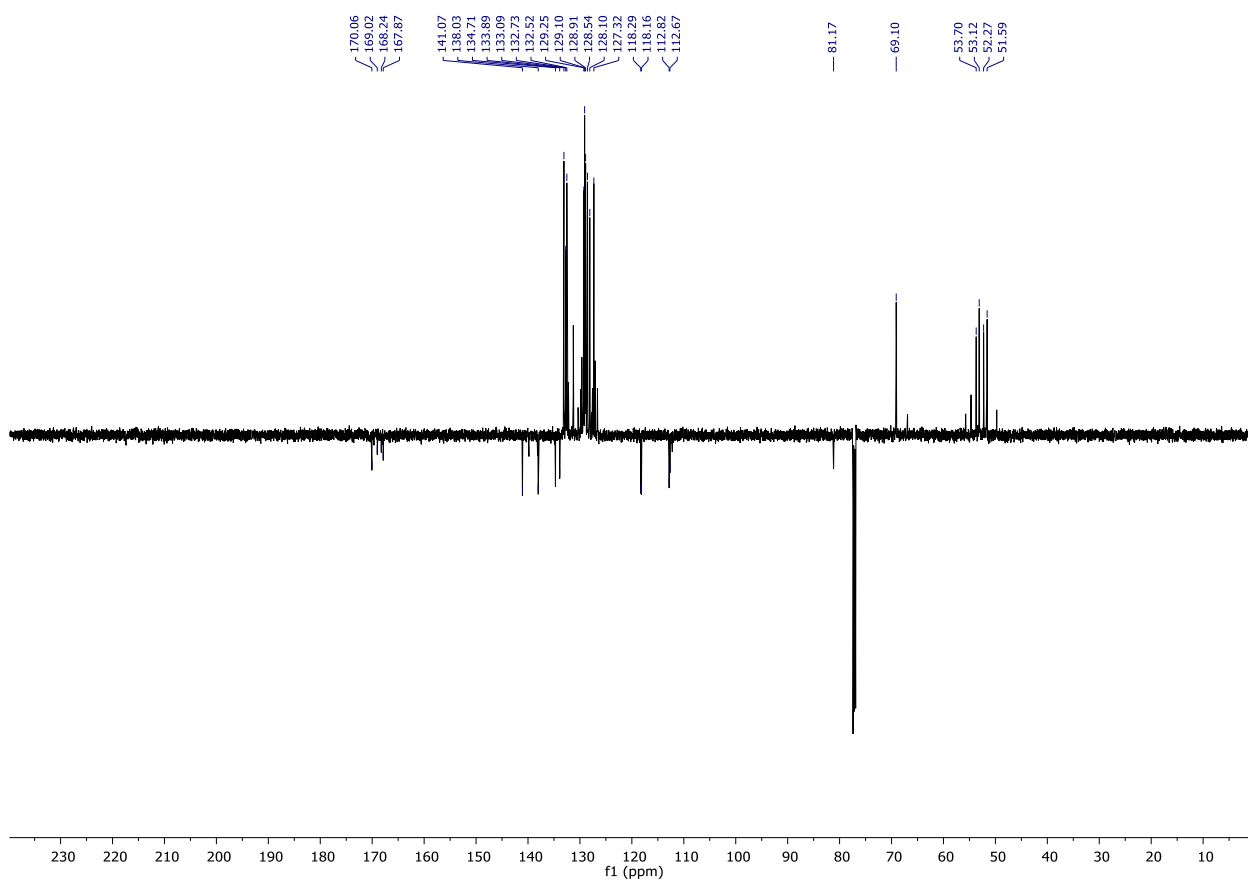

$^{13}\text{C}\{^1\text{H}\}$  (APT) NMR spectrum ( $\text{CDCl}_3$ , 100.6 MHz) of **3g** (mixture of diastereomers)

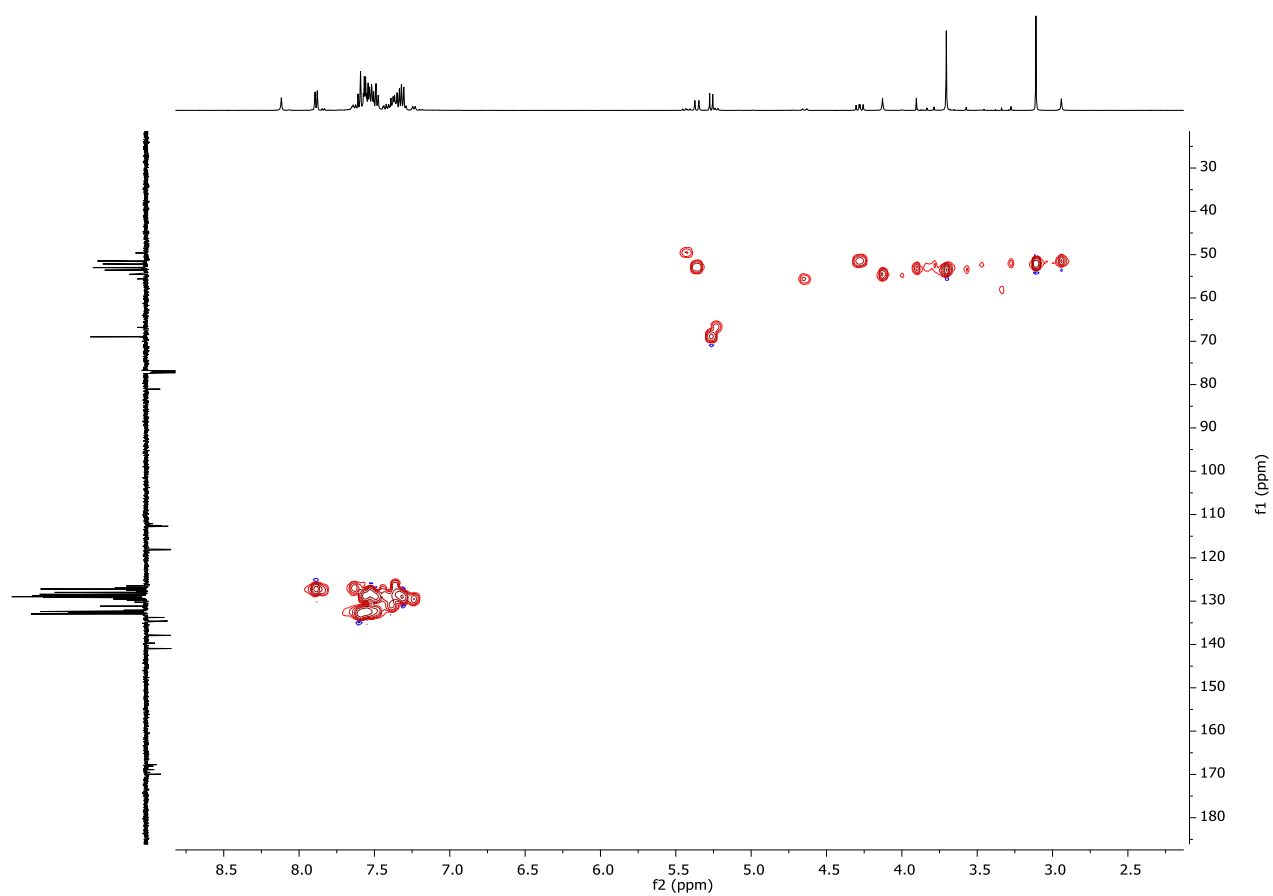

$^1\text{H}$ - $^{13}\text{C}$  HSQC ( $\text{CDCl}_3$ ) correlation spectrum of **3g** (mixture of diastereomers)

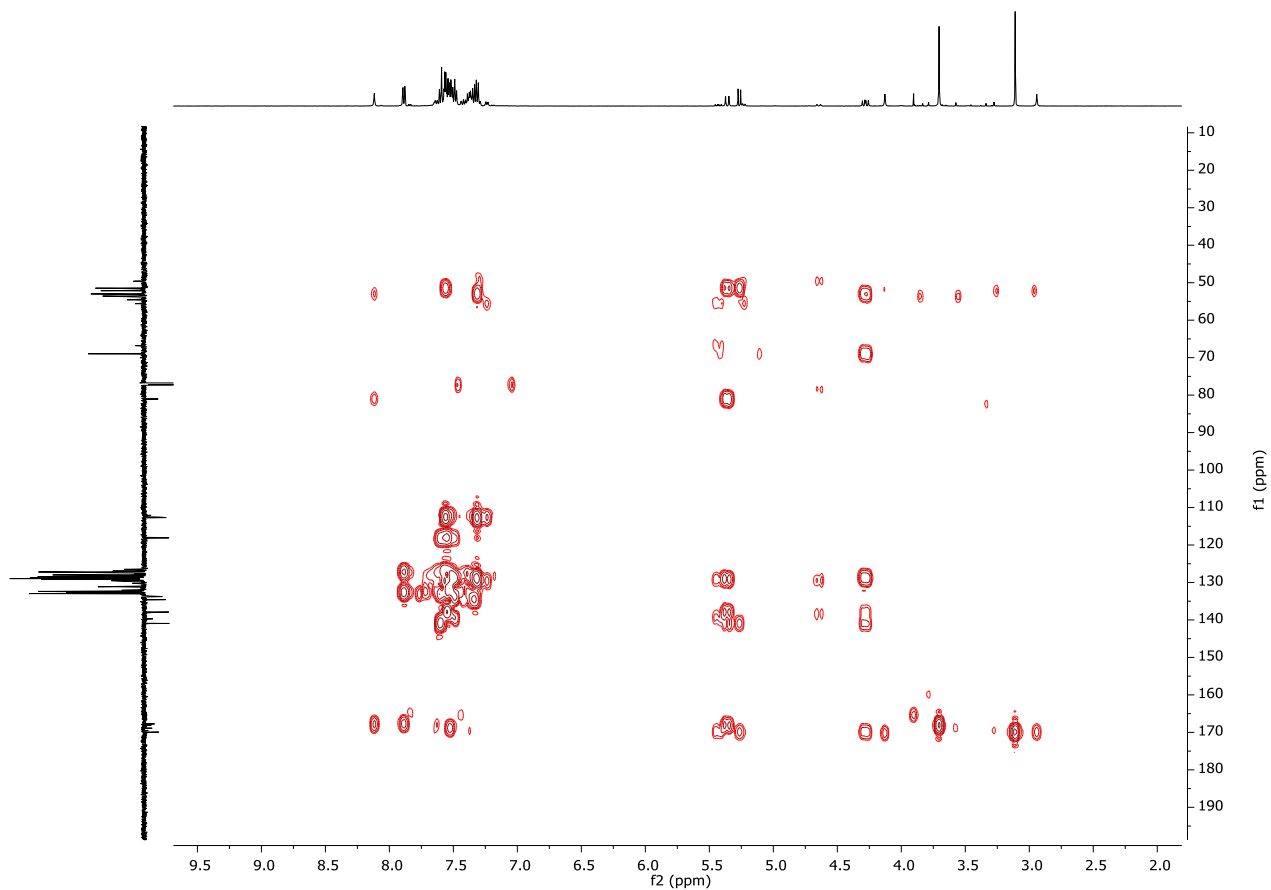

$^1\text{H}$ - $^{13}\text{C}$  HMBC ( $\text{CDCl}_3$ ) correlation spectrum of **3g** (mixture of diastereomers)

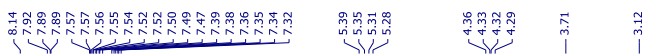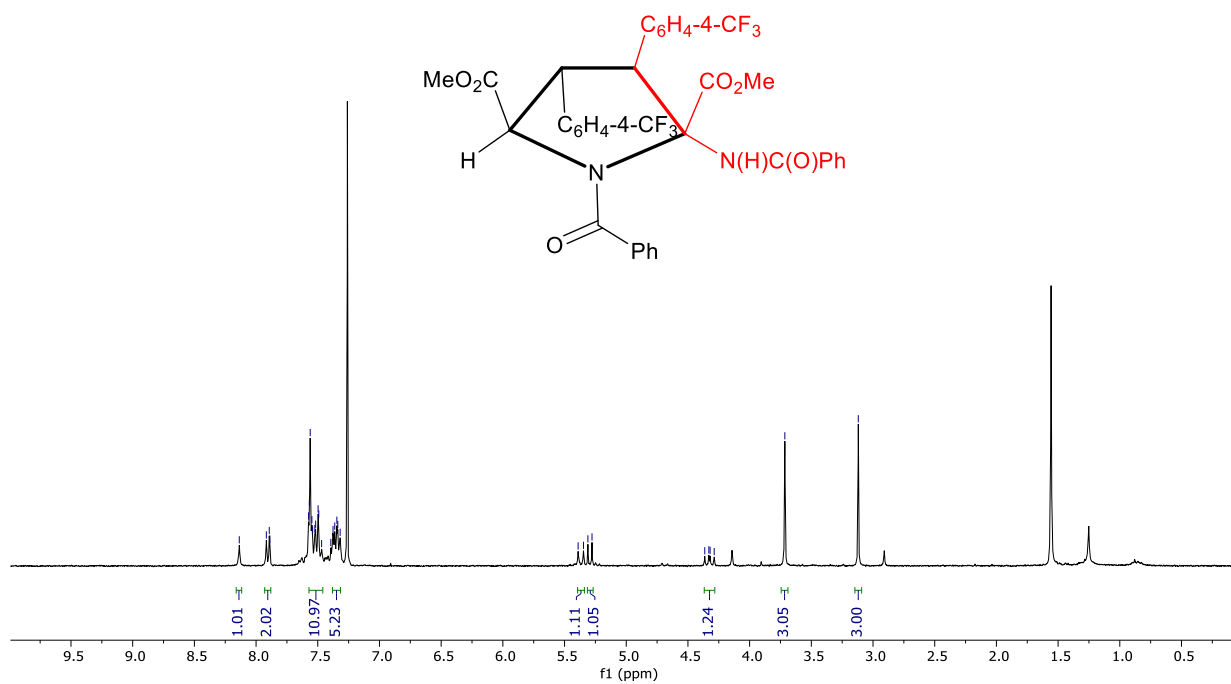

$^1\text{H}$  NMR spectrum ( $\text{CDCl}_3$ , 300.13 MHz) of **3h**

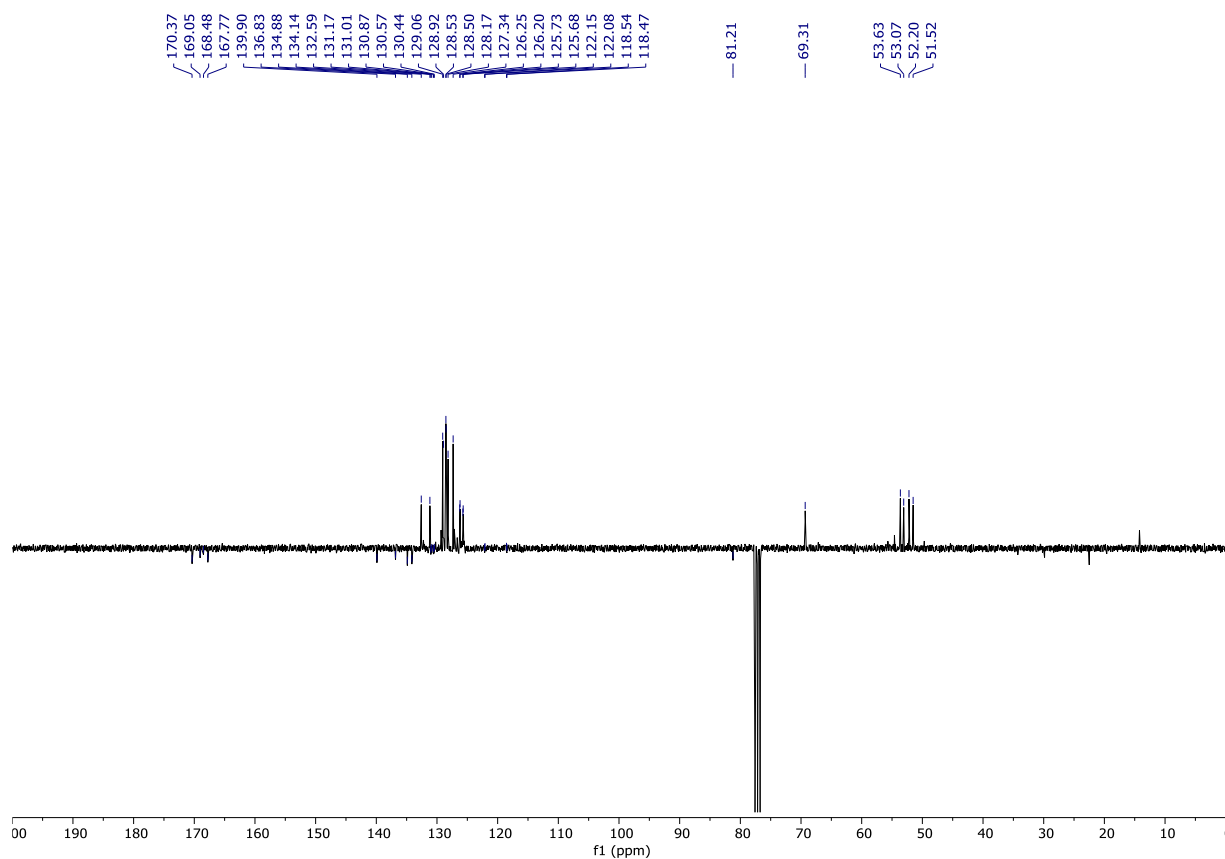

$^{13}\text{C}\{^1\text{H}\}$  (APT) NMR spectrum ( $\text{CDCl}_3$ , 75.5 MHz) of **3h**

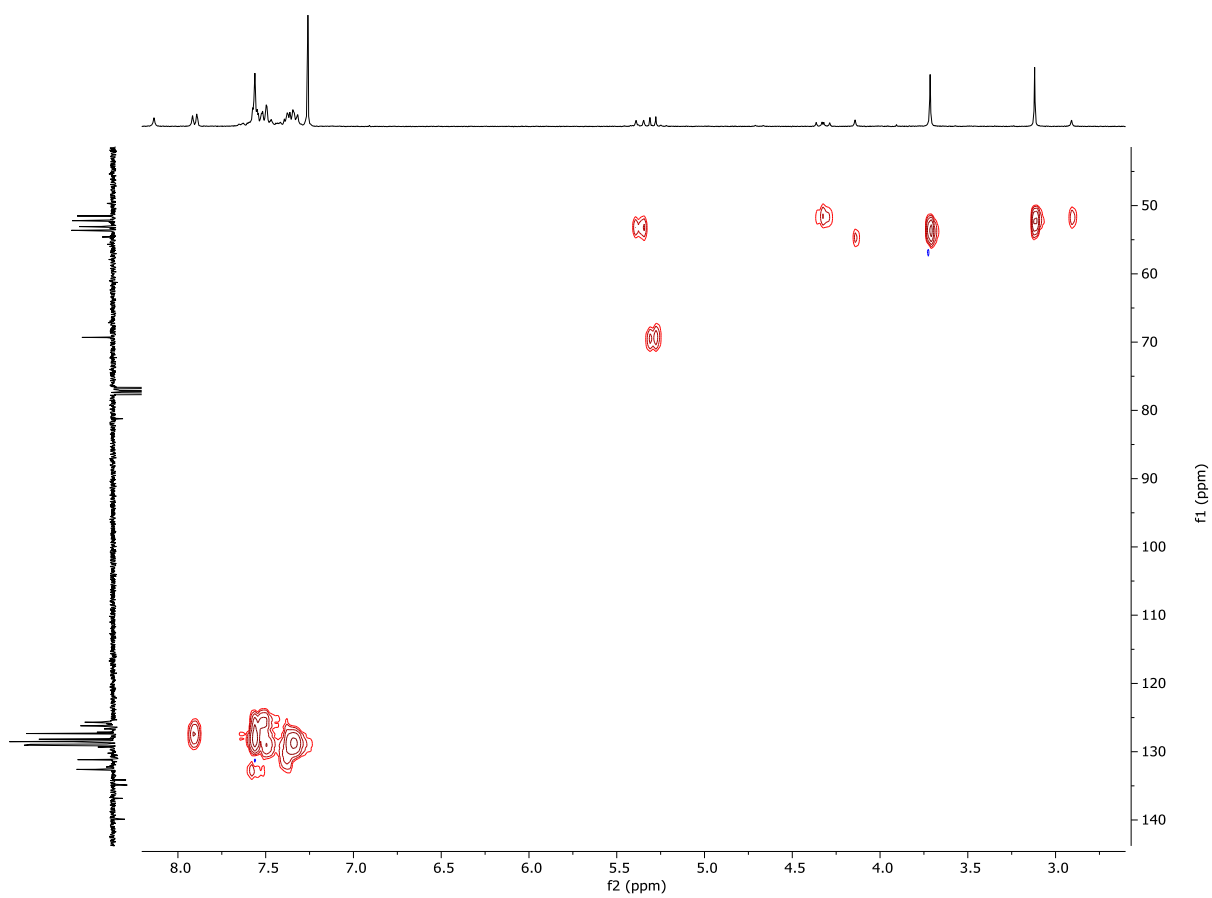

$^1\text{H}$ - $^{13}\text{C}$  HSQC ( $\text{CDCl}_3$ ) correlation spectrum of **3h**

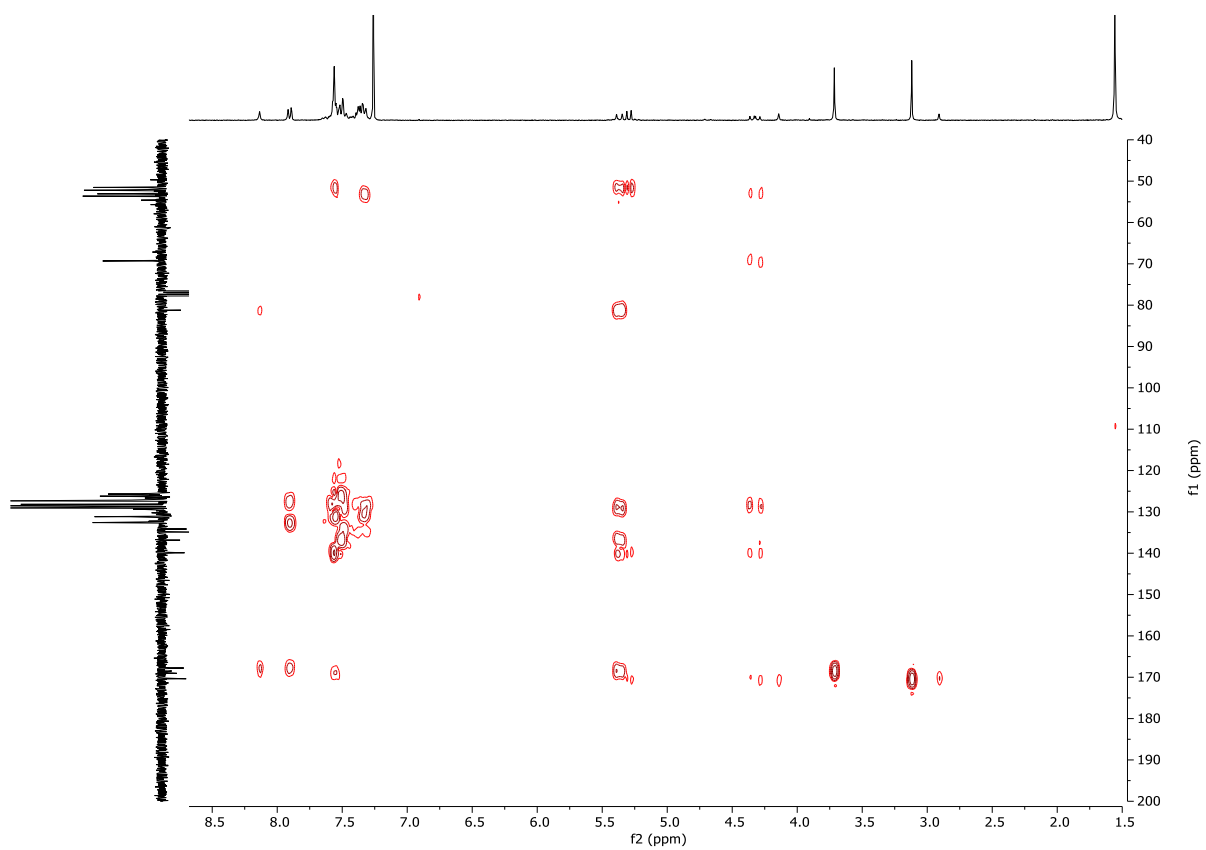

$^1\text{H}$ - $^{13}\text{C}$  HMBC ( $\text{CDCl}_3$ ) correlation spectrum of **3h**

-62.71  
-62.75

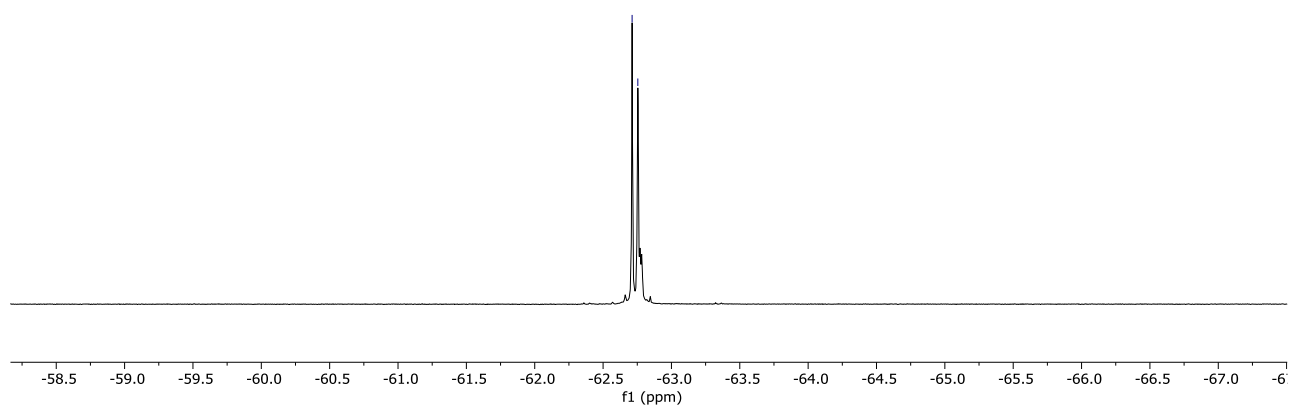

$^{19}\text{F}$  NMR spectrum ( $\text{CDCl}_3$ , 282.4 MHz) of **3h**

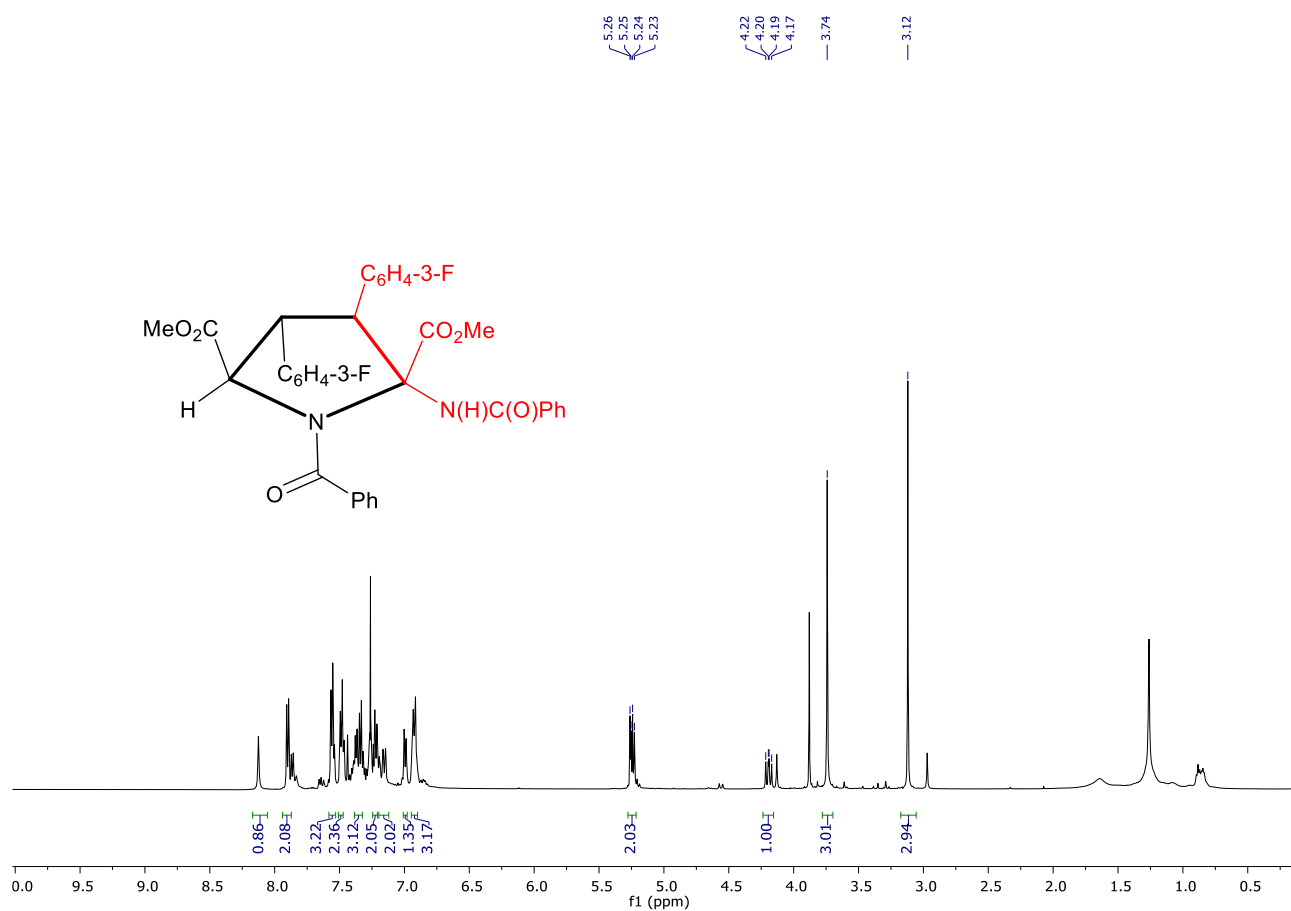

$^1\text{H}$  NMR spectrum ( $\text{CDCl}_3$ , 300.13 MHz) of **3k** (mixture of isomers)

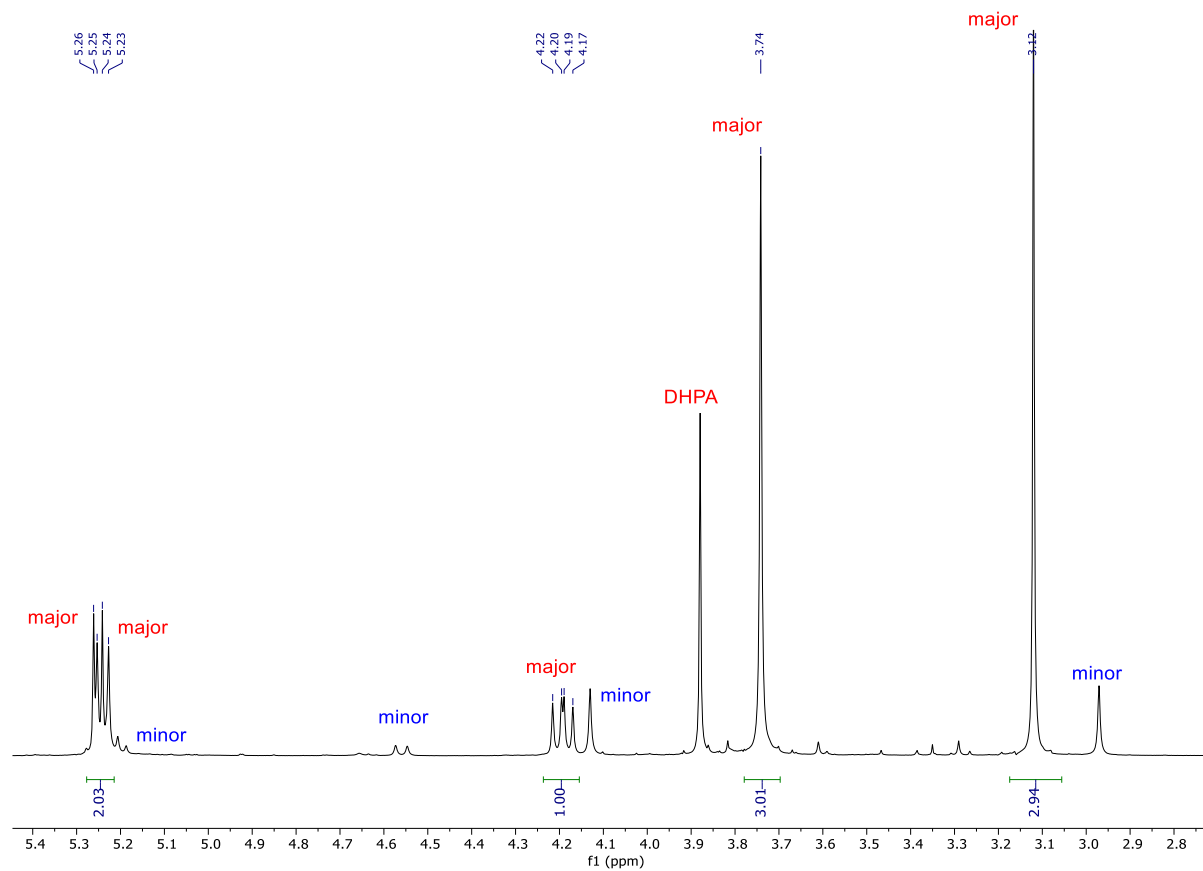

$^1\text{H}$  NMR spectrum ( $\text{CDCl}_3$ , 300.13 MHz) of **3k** (mixture of isomers, zoom of the aliphatic part)

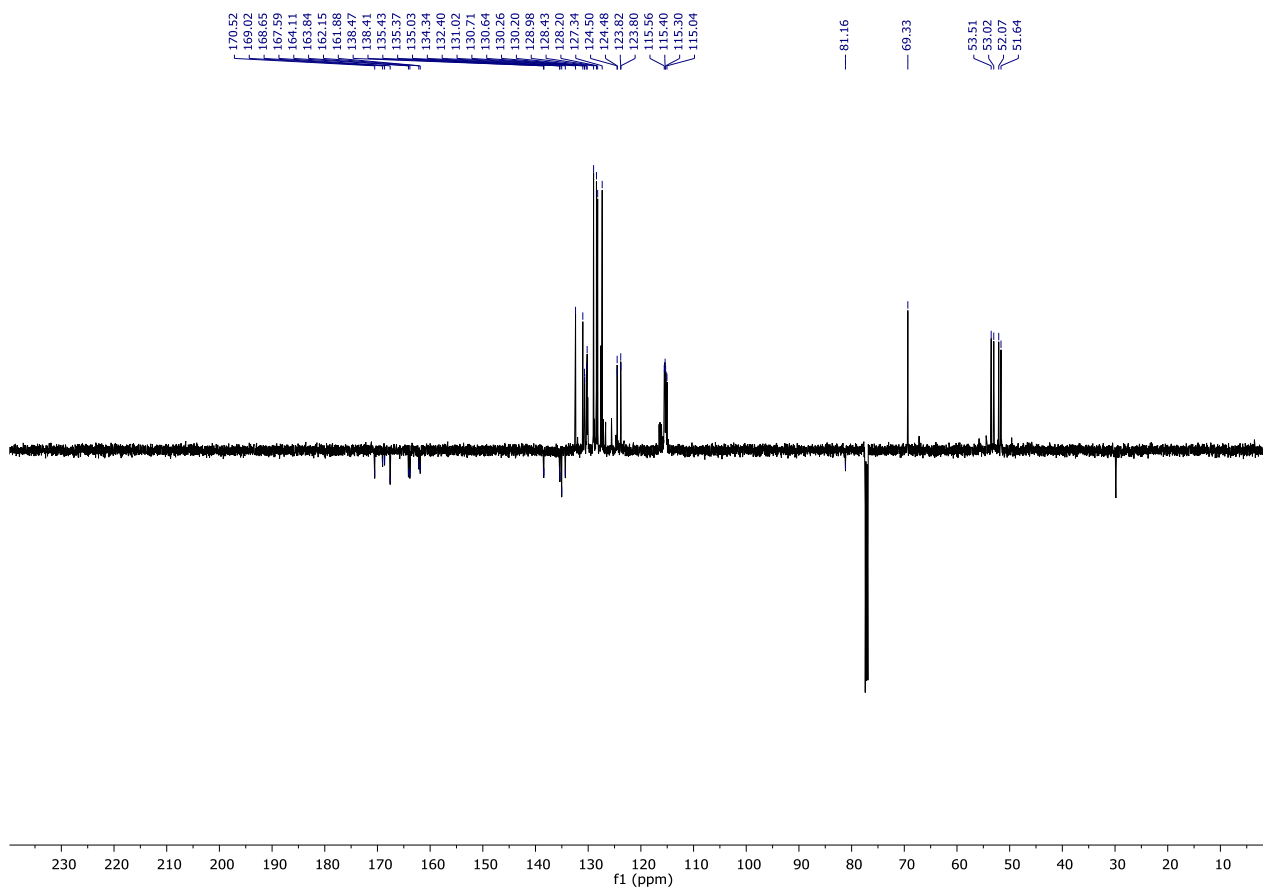

$^{13}\text{C}\{^1\text{H}\}$  (APT) NMR spectrum ( $\text{CDCl}_3$ , 75.5 MHz) of **3k** (mixture of isomers)

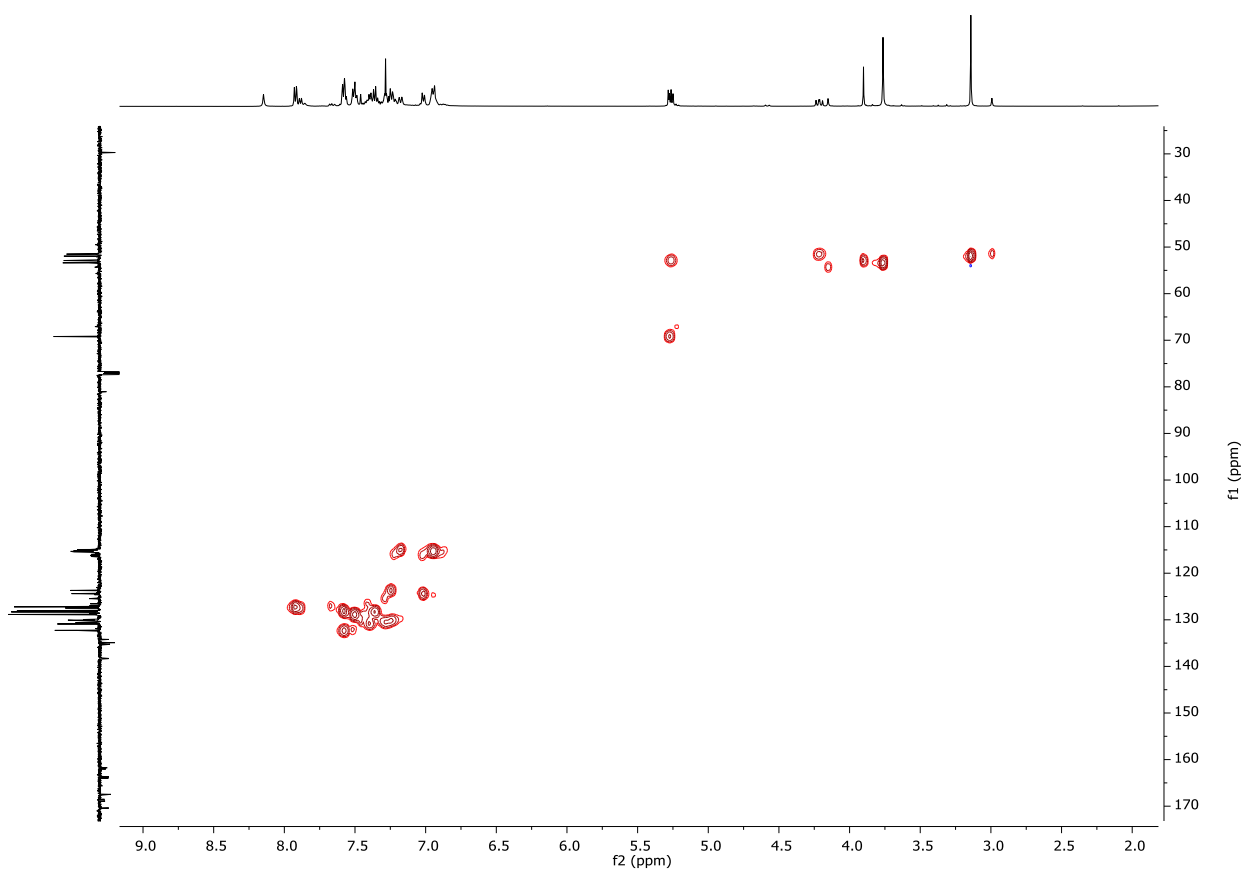

$^1\text{H}$ - $^{13}\text{C}$  HSQC ( $\text{CDCl}_3$ ) correlation spectrum of **3k** (mixture of isomers)

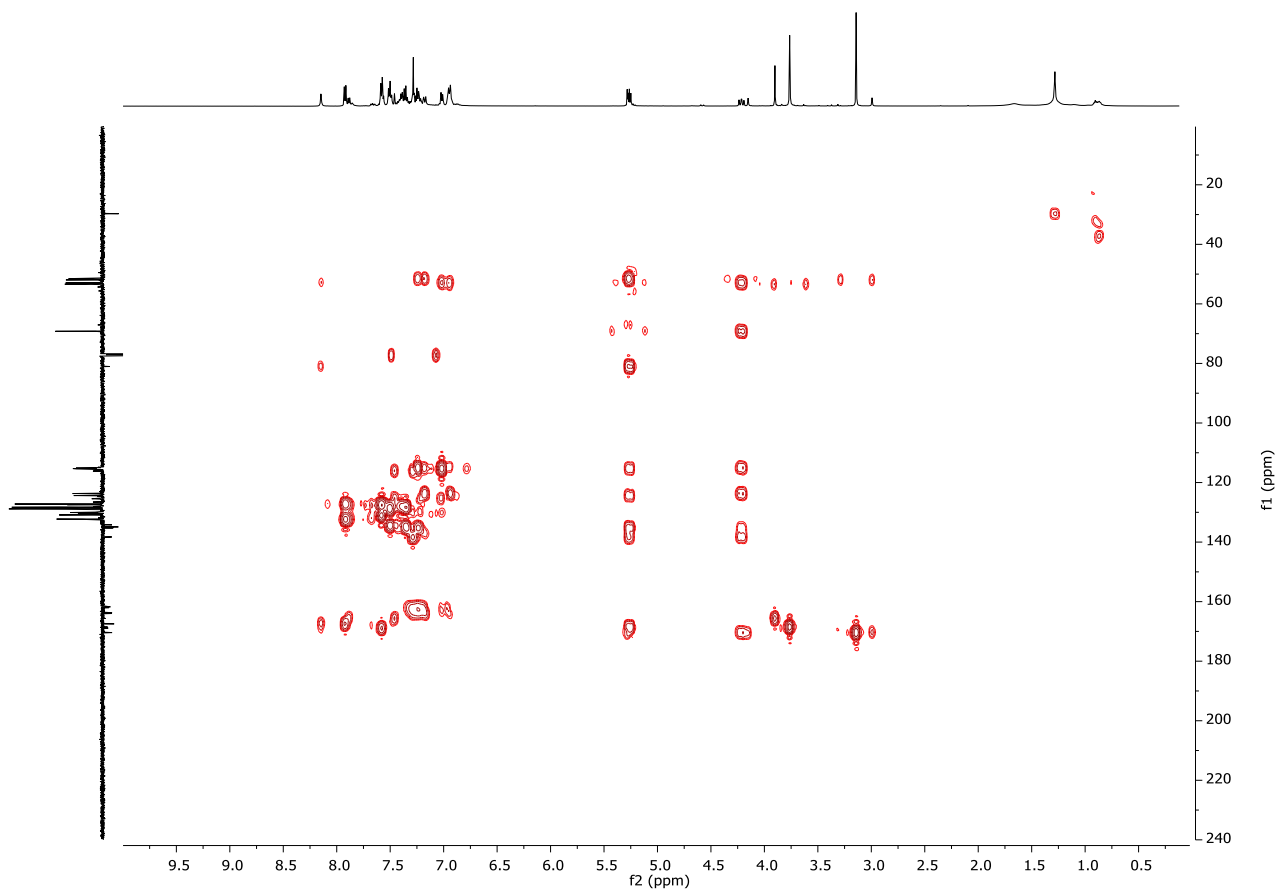

$^1\text{H}$ - $^{13}\text{C}$  HMBC ( $\text{CDCl}_3$ ) correlation spectrum of **3k** (mixture of isomers)

-111.96  
-111.98  
-111.99  
-112.00  
-112.01  
-112.04  
-112.22  
-112.24  
-112.25  
-112.26  
-112.27  
-112.29  
-112.31

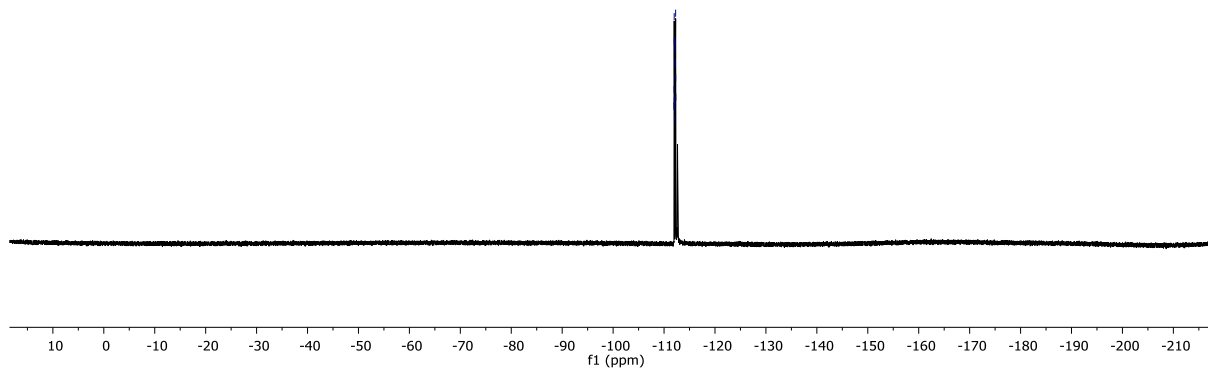

$^{19}\text{F}$  NMR spectrum ( $\text{CDCl}_3$ , 282.4 MHz) of **3k** (mixture of isomers)



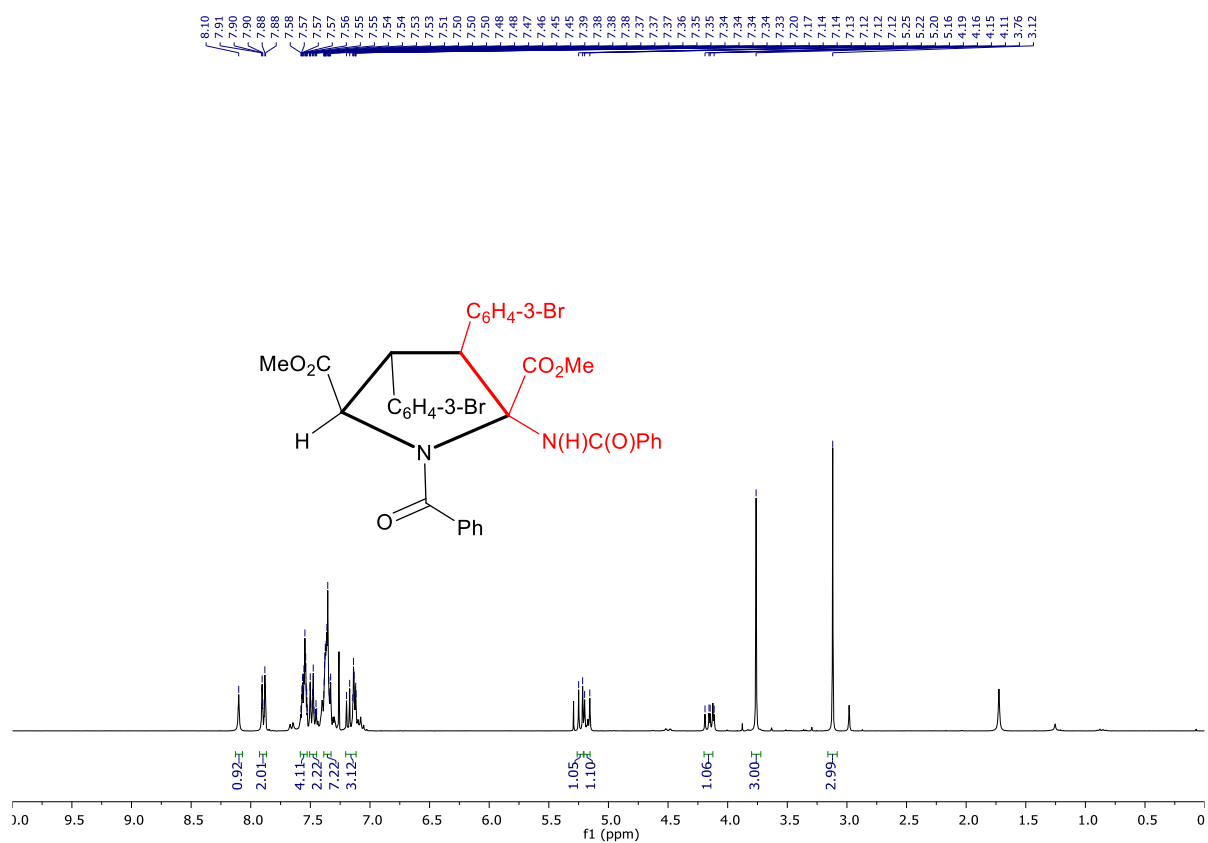

**<sup>1</sup>H NMR spectrum (CDCl<sub>3</sub>, 300.13 MHz) of **3****

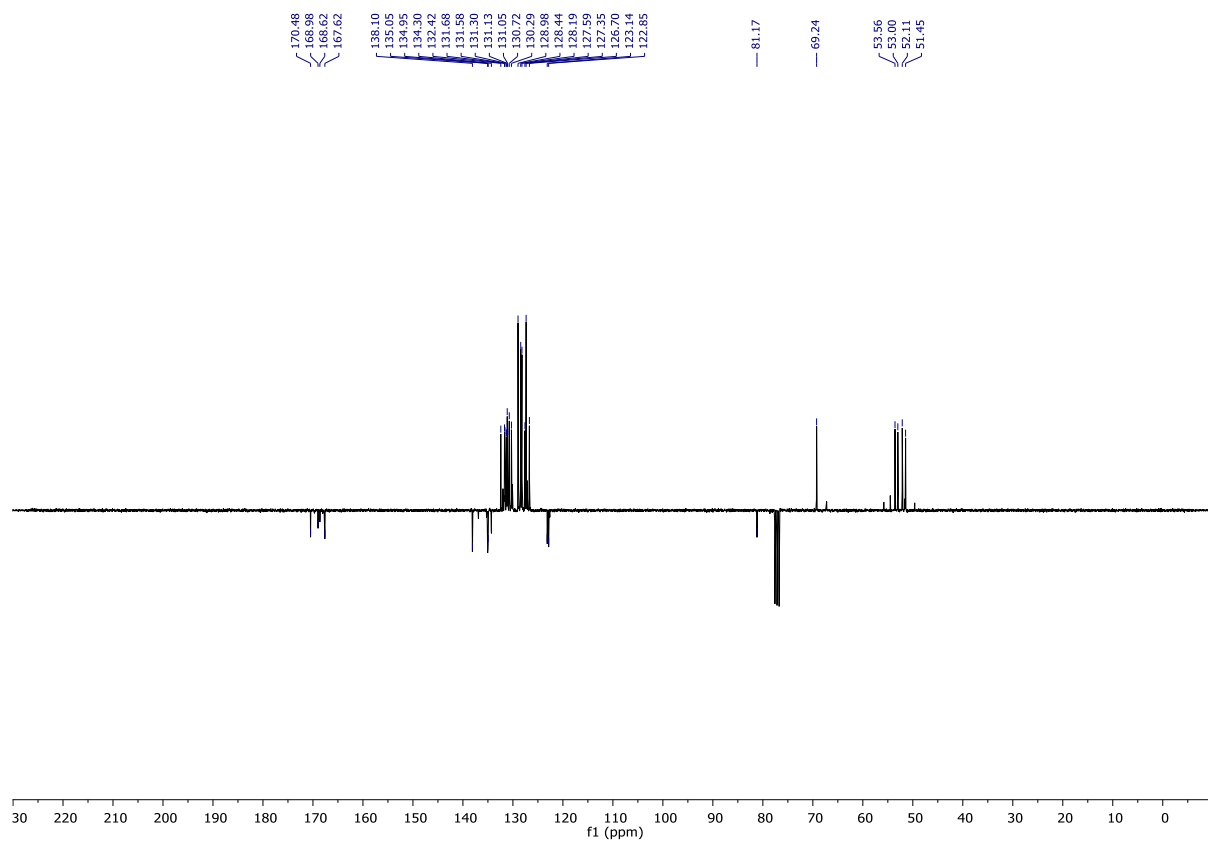

**<sup>13</sup>C{<sup>1</sup>H} (APT) NMR spectrum (CDCl<sub>3</sub>, 75.5 MHz) of **3****

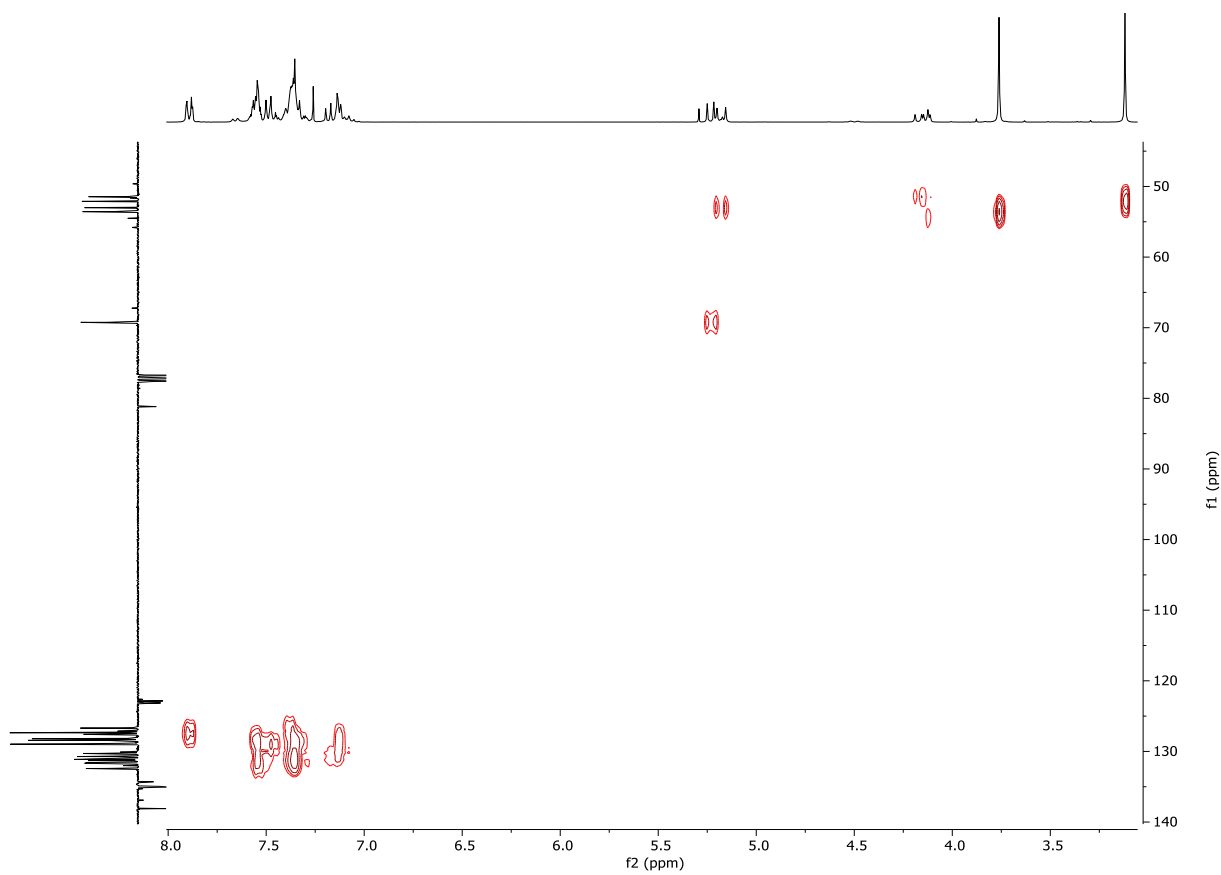

$^1\text{H}$ - $^{13}\text{C}$  HSQC ( $\text{CDCl}_3$ ) correlation spectrum of **3I**

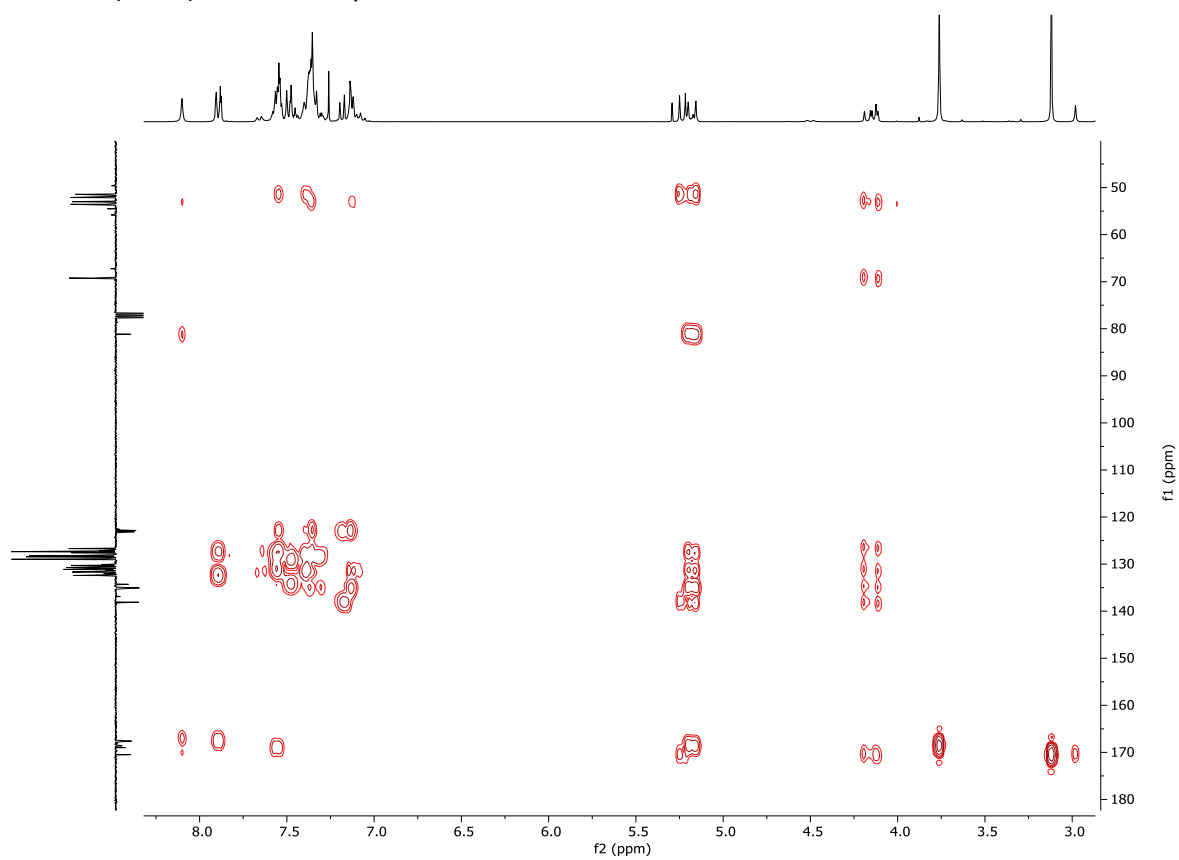

$^1\text{H}$ - $^{13}\text{C}$  HMBC ( $\text{CDCl}_3$ ) correlation spectrum of **3I**

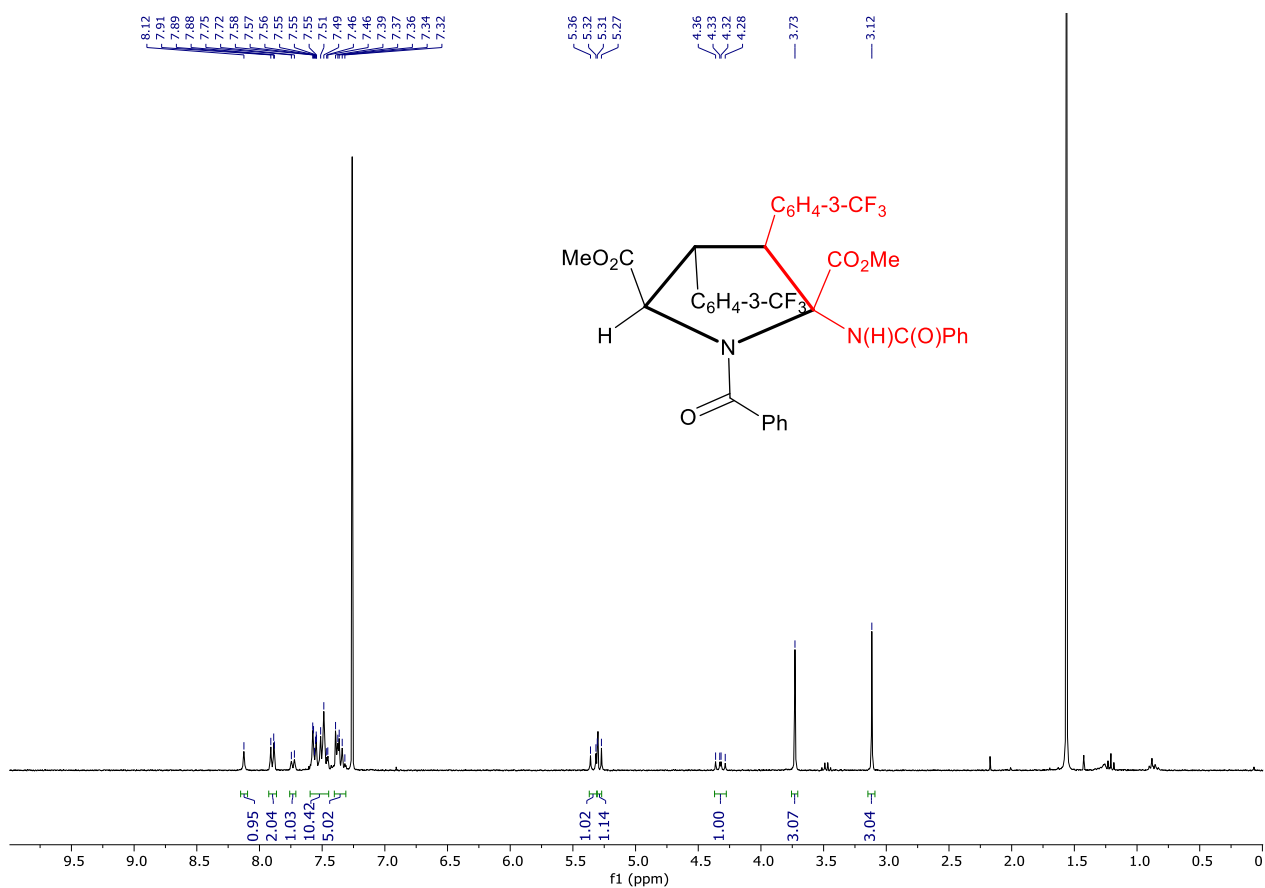

**<sup>1</sup>H NMR spectrum (CDCl<sub>3</sub>, 300.13 MHz) of **3m****

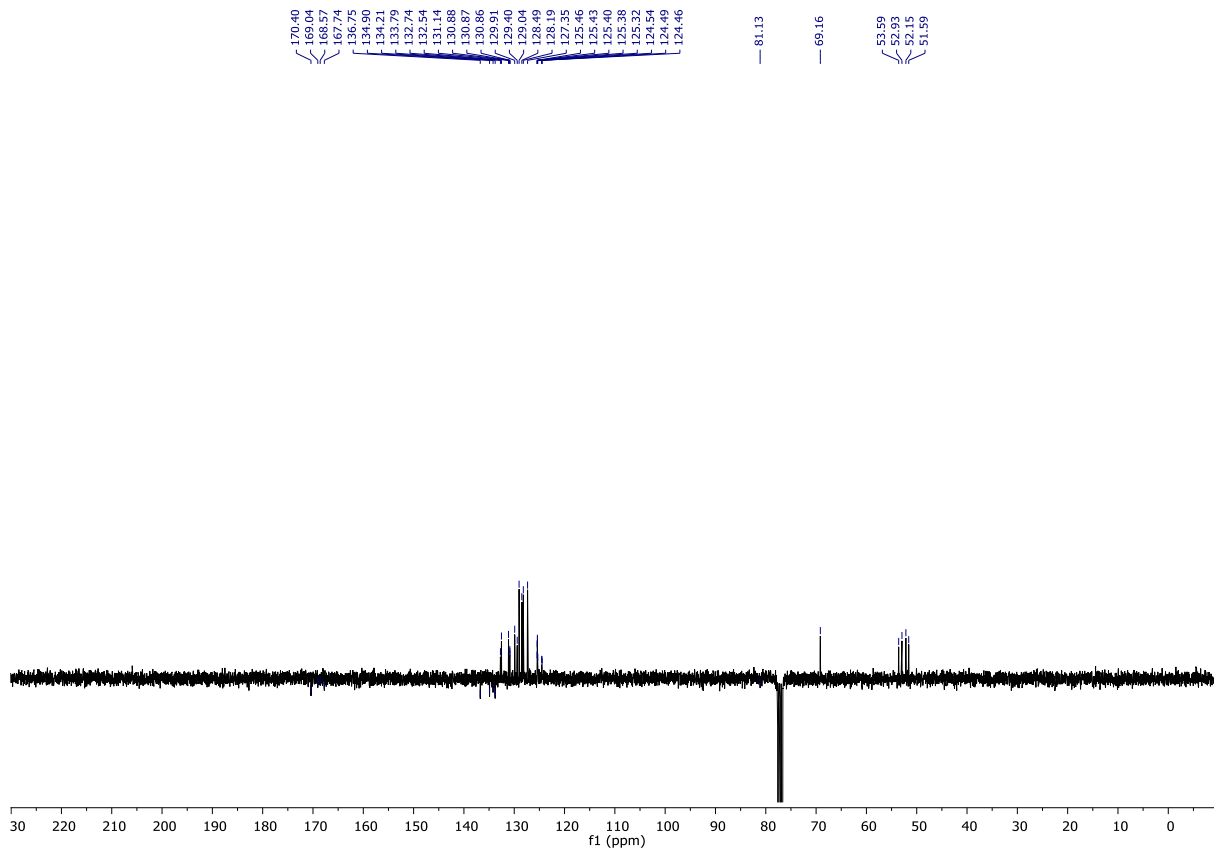

**<sup>13</sup>C{<sup>1</sup>H} (APT) NMR spectrum (CDCl<sub>3</sub>, 75.5 MHz) of **3m****

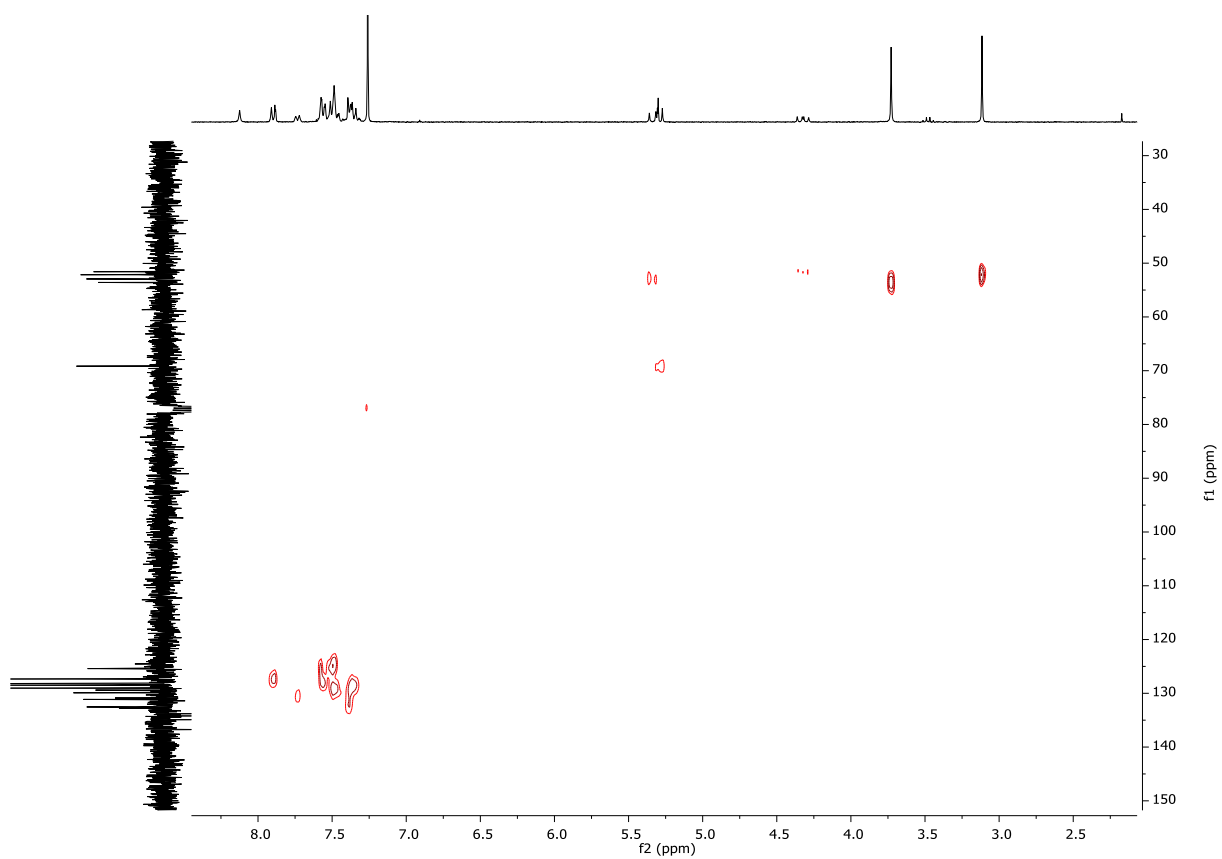

$^1\text{H}$ - $^{13}\text{C}$  HSQC ( $\text{CDCl}_3$ ) correlation spectrum of **3m**

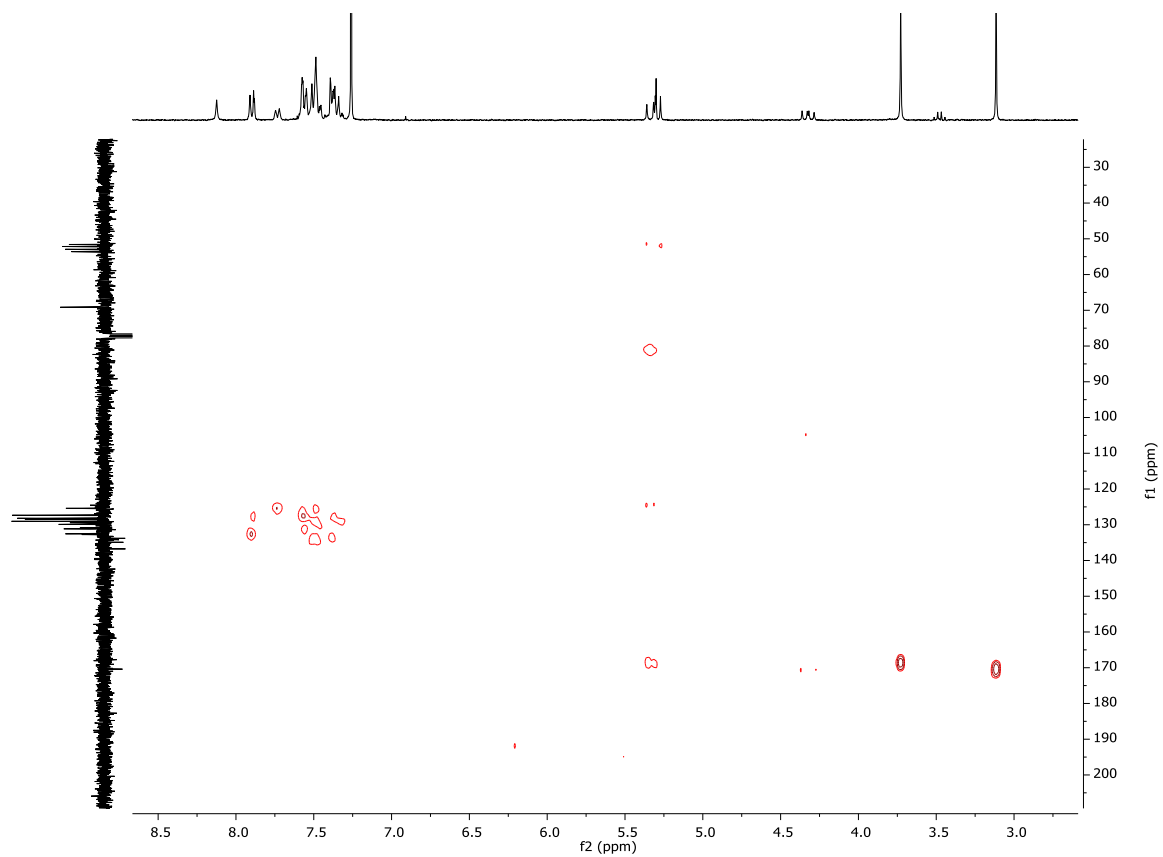

$^1\text{H}$ - $^{13}\text{C}$  HMBC ( $\text{CDCl}_3$ ) correlation spectrum of **3m**

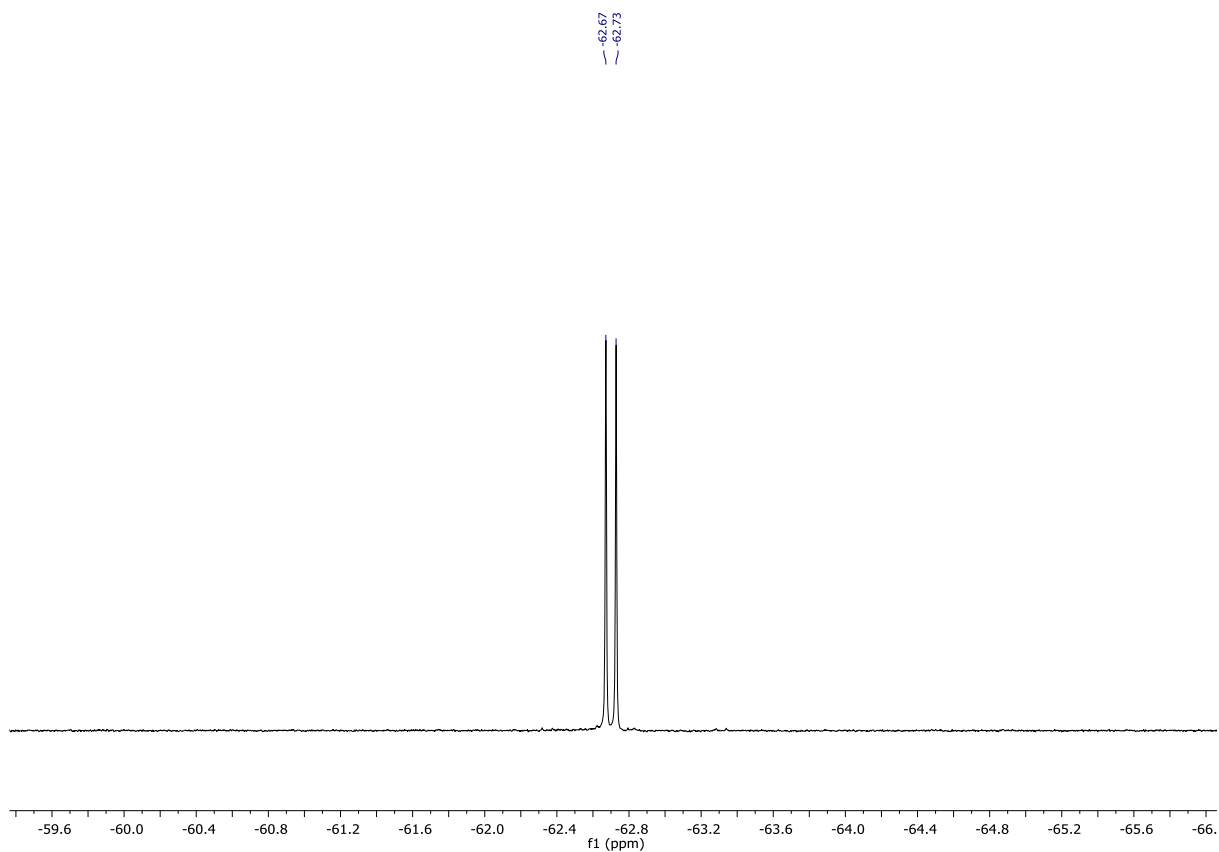

$^{19}\text{F}$  NMR spectrum ( $\text{CDCl}_3$ , 282.4 MHz) of **3m**

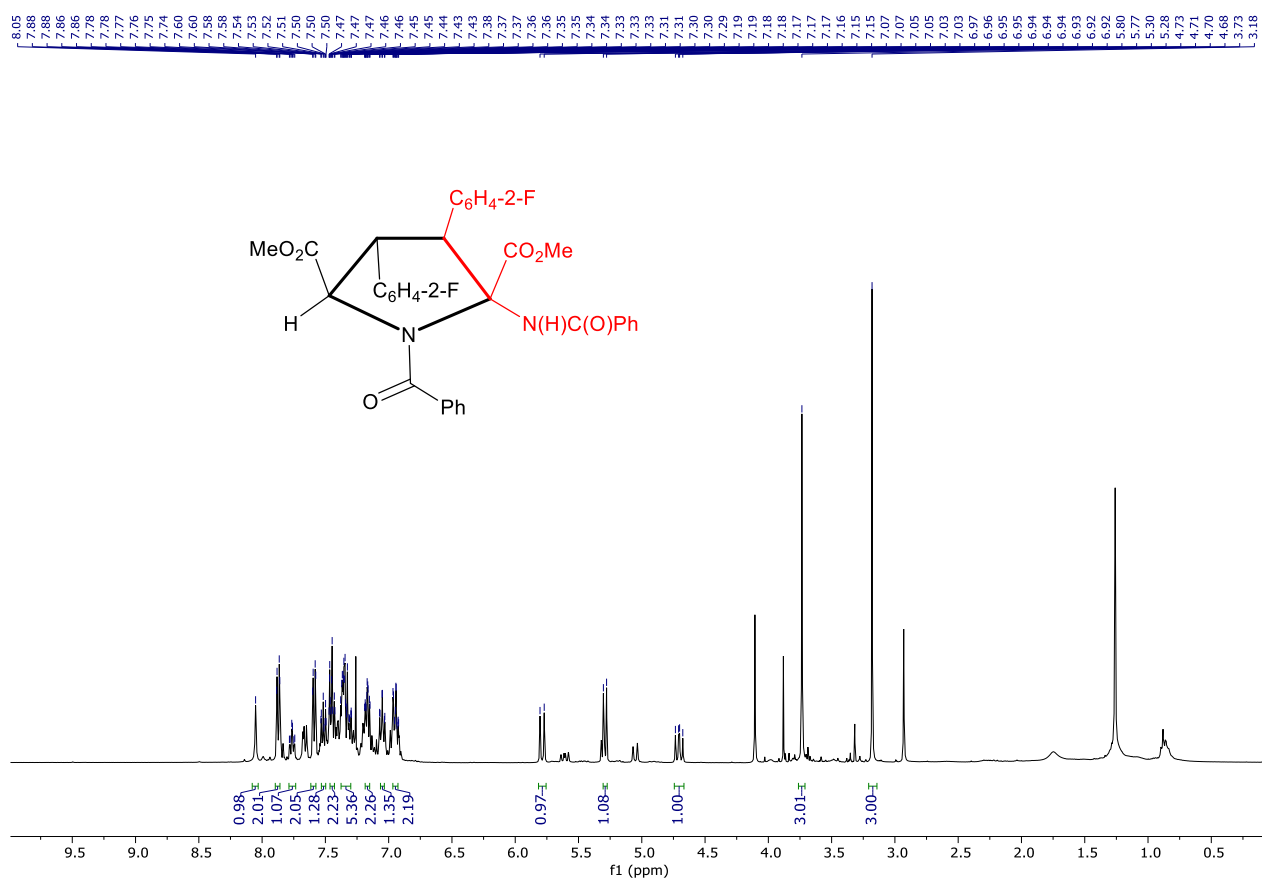

$^1\text{H}$  NMR spectrum ( $\text{CDCl}_3$ , 400.13 MHz) of **3o** (mixture of isomers)

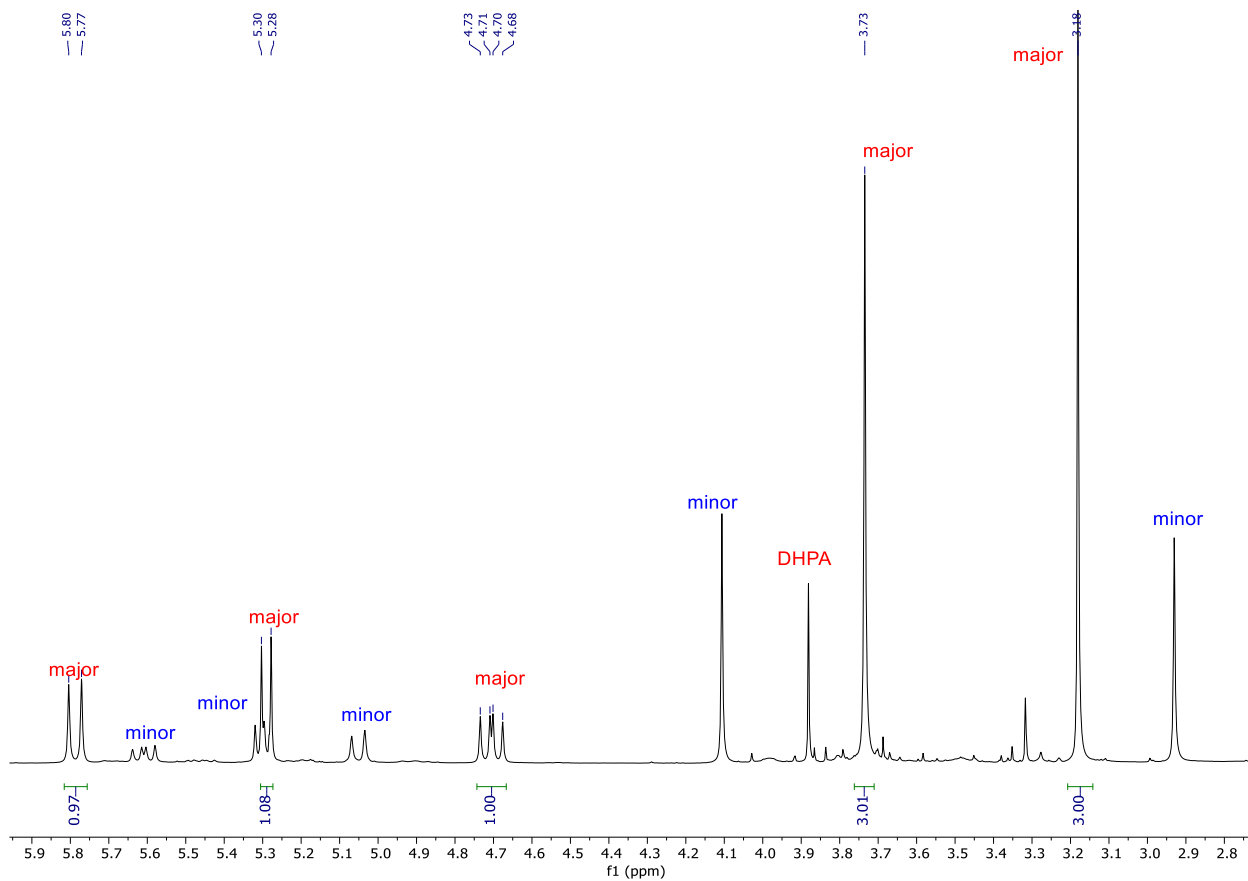

$^1\text{H}$  NMR spectrum ( $\text{CDCl}_3$ , 400.13 MHz) of **3o** (mixture of isomers, zoom of the aliphatic part)

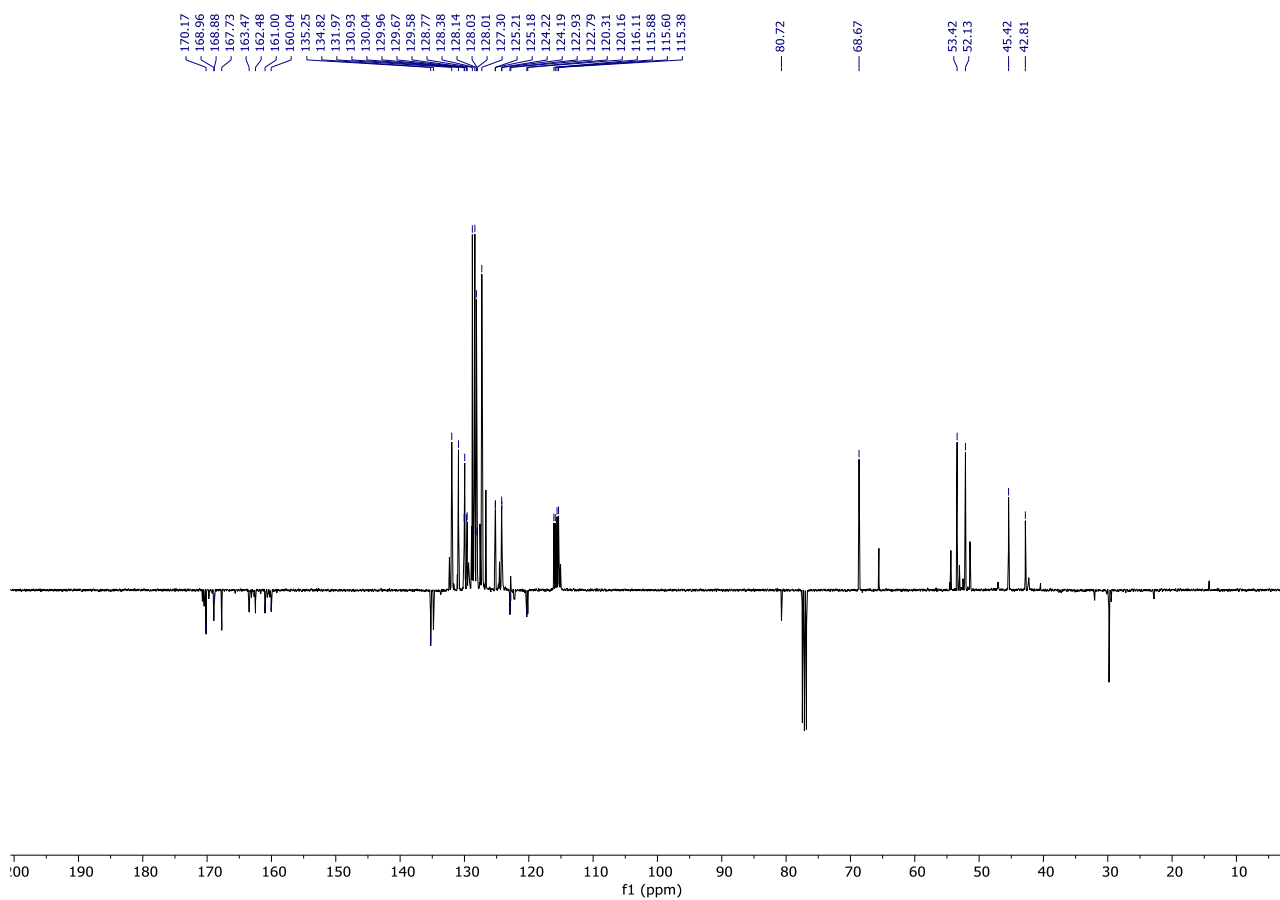

$^{13}\text{C}\{^1\text{H}\}$  (APT) NMR spectrum ( $\text{CDCl}_3$ , 100.6 MHz) of **3o** (mixture of isomers)

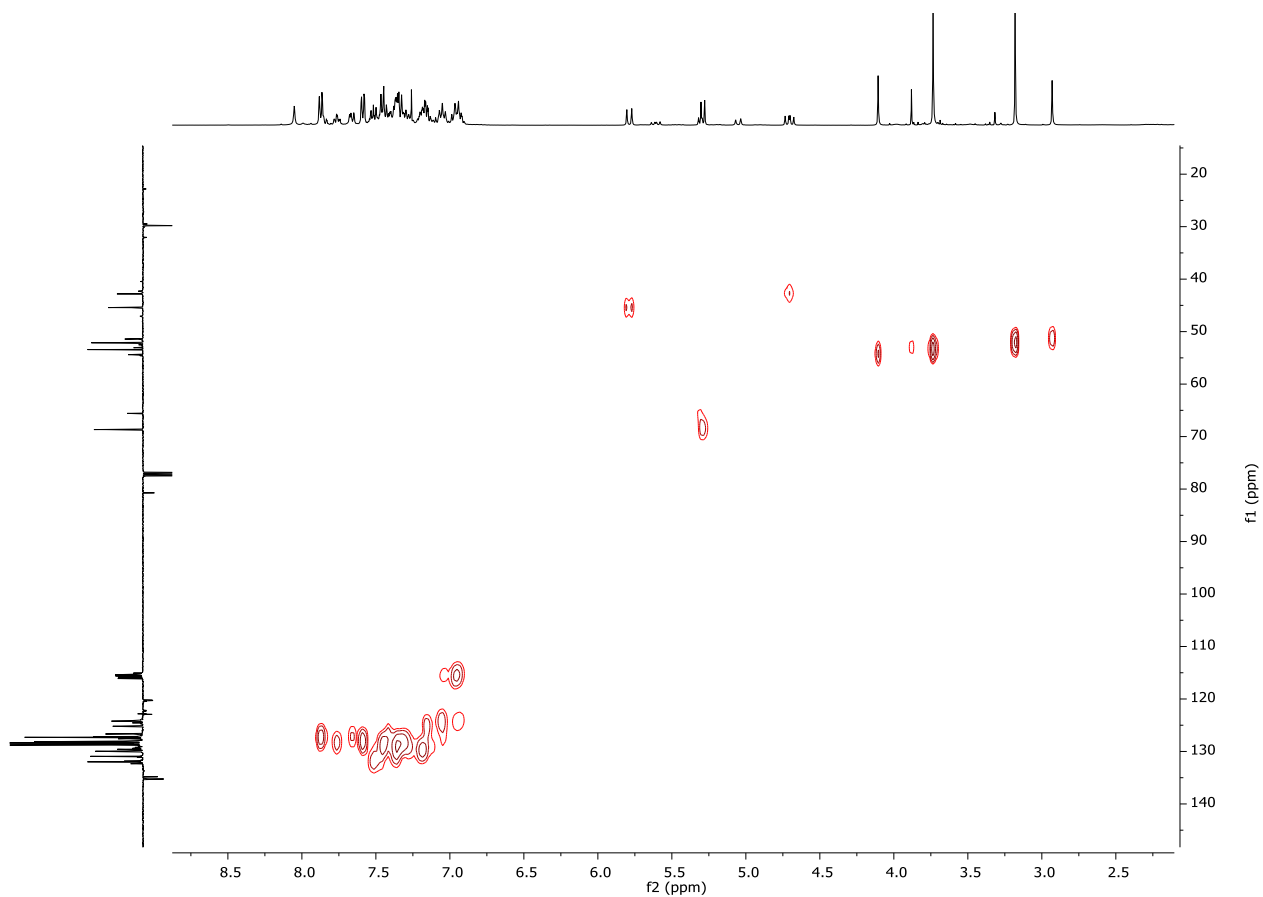

$^1\text{H}$ - $^{13}\text{C}$  HSQC ( $\text{CDCl}_3$ ) correlation spectrum of **3o** (mixture of isomers)

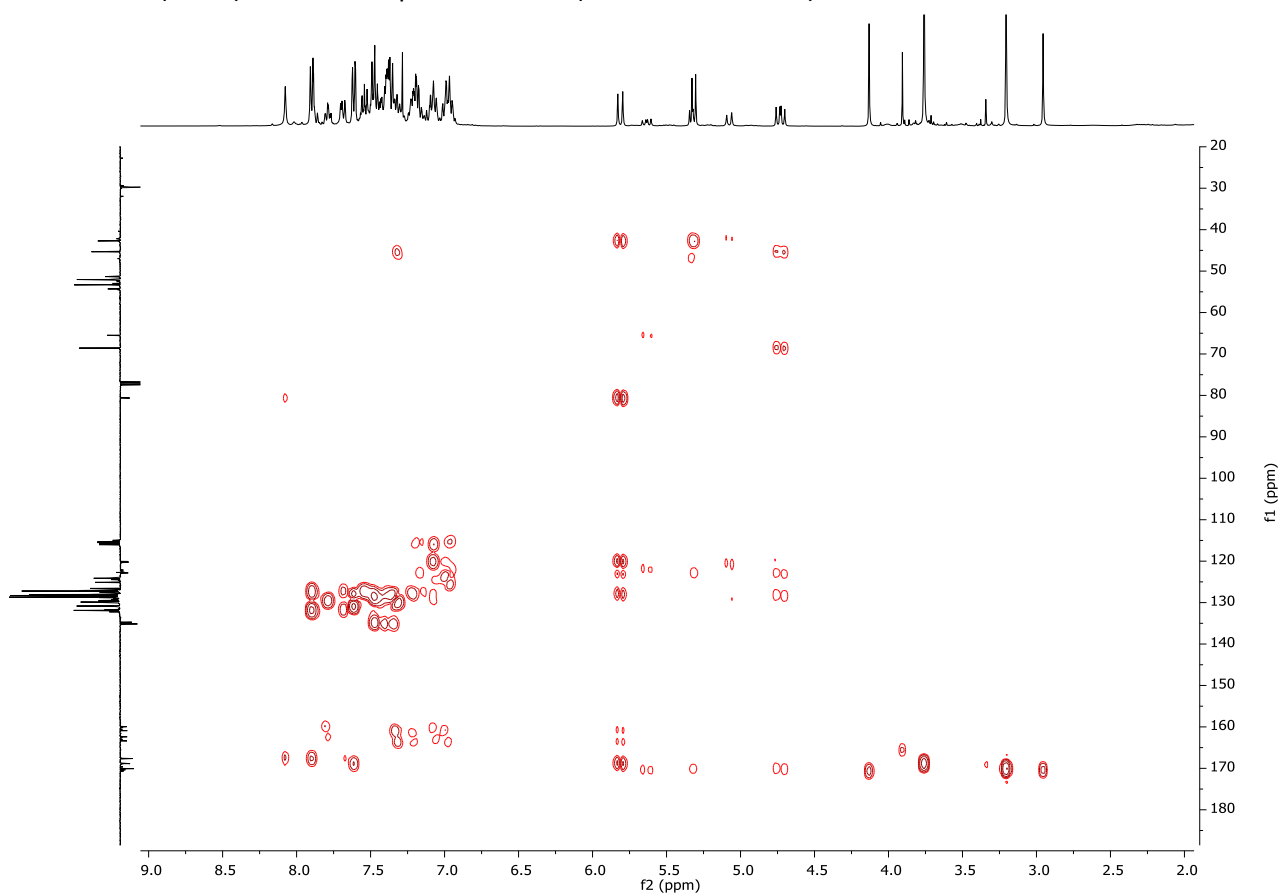

$^1\text{H}$ - $^{13}\text{C}$  HMBC ( $\text{CDCl}_3$ ) correlation spectrum of **3o** (mixture of isomers)

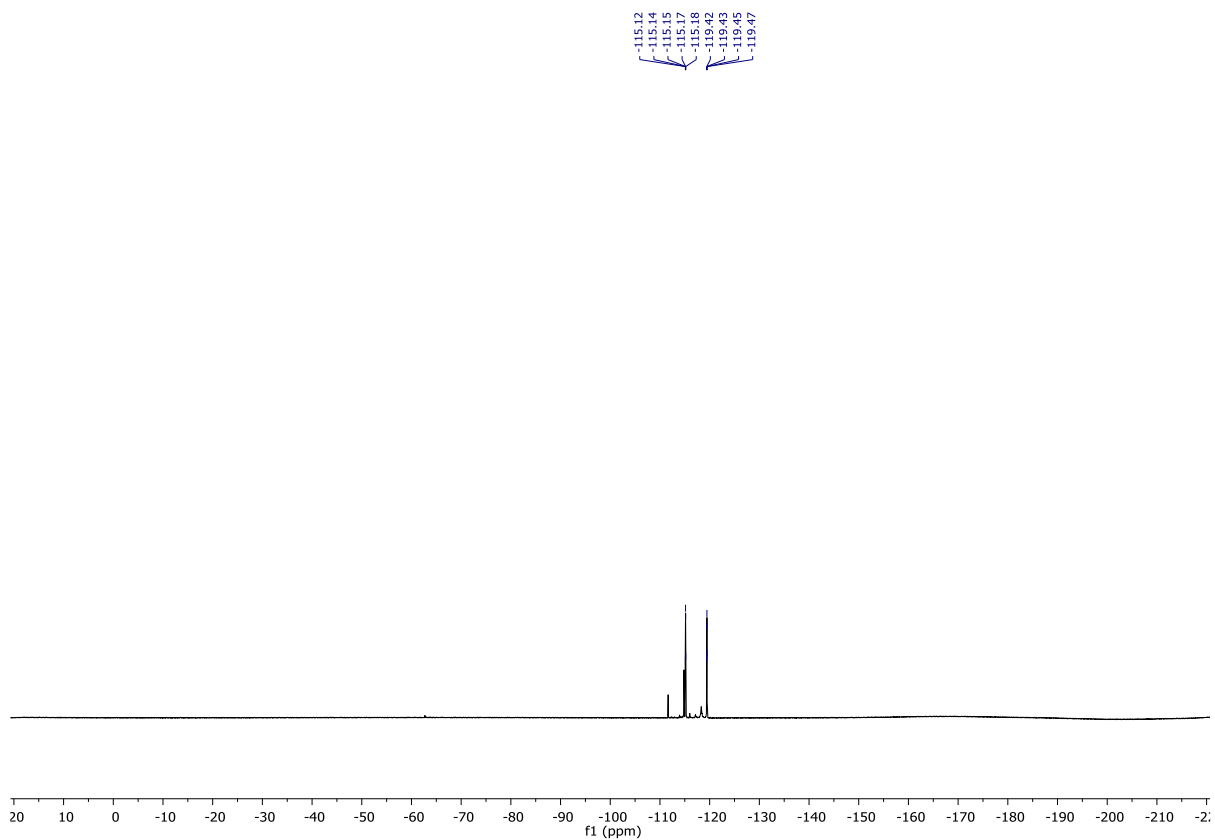

$^{19}\text{F}$  NMR spectrum ( $\text{CDCl}_3$ , 376.5 MHz) of **3o** (mixture of isomers)

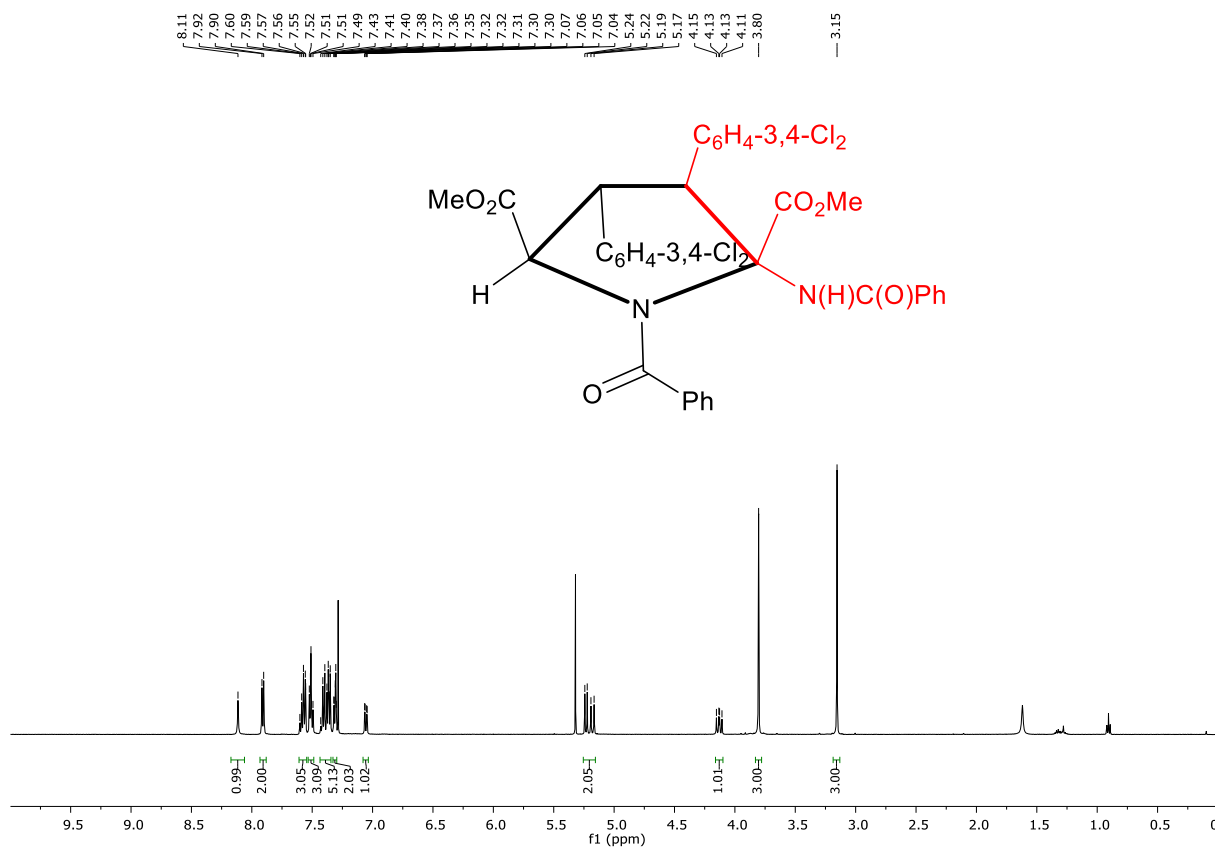

$^1\text{H}$  NMR spectrum ( $\text{CDCl}_3$ , 500.13 MHz) of **3r**



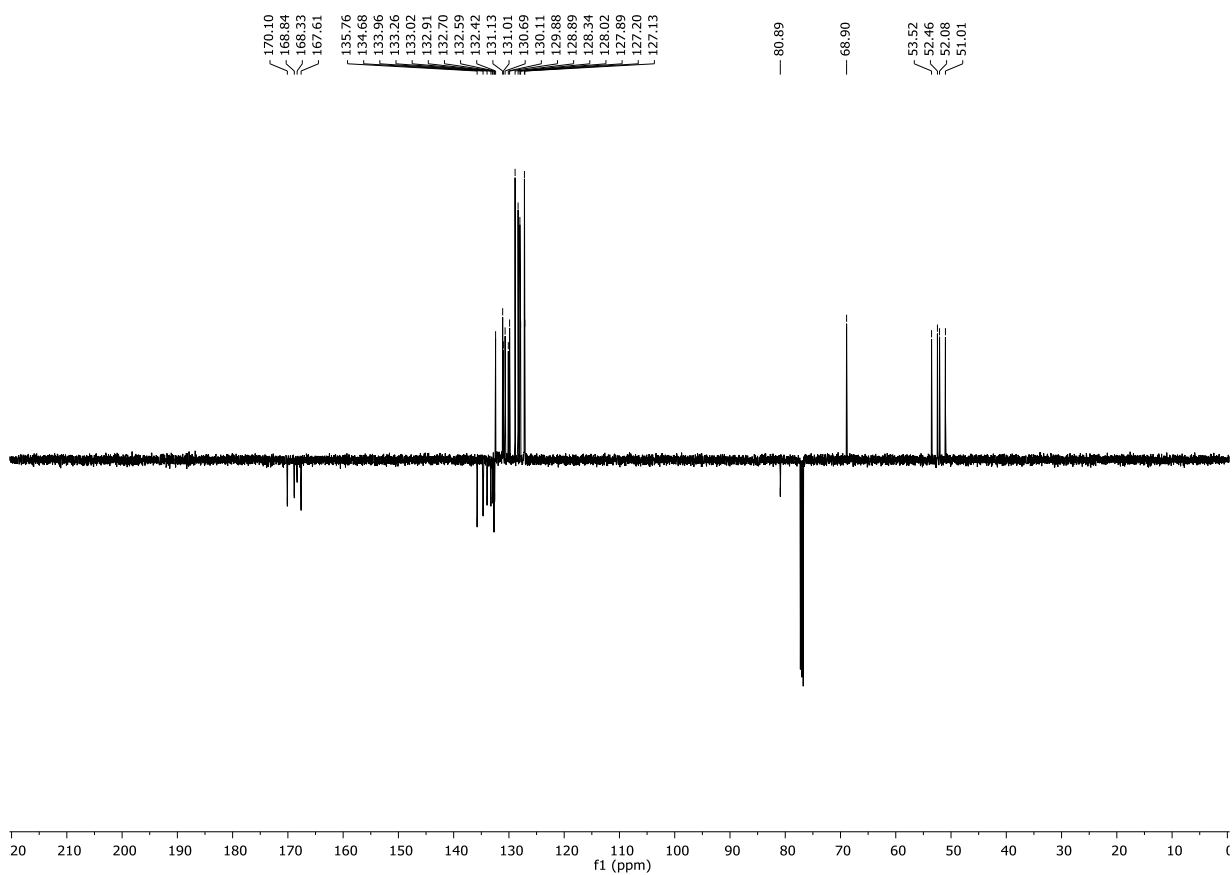

$^{13}\text{C}\{^1\text{H}\}$  (APT) NMR spectrum ( $\text{CDCl}_3$ , 125.7 MHz) of **3r**

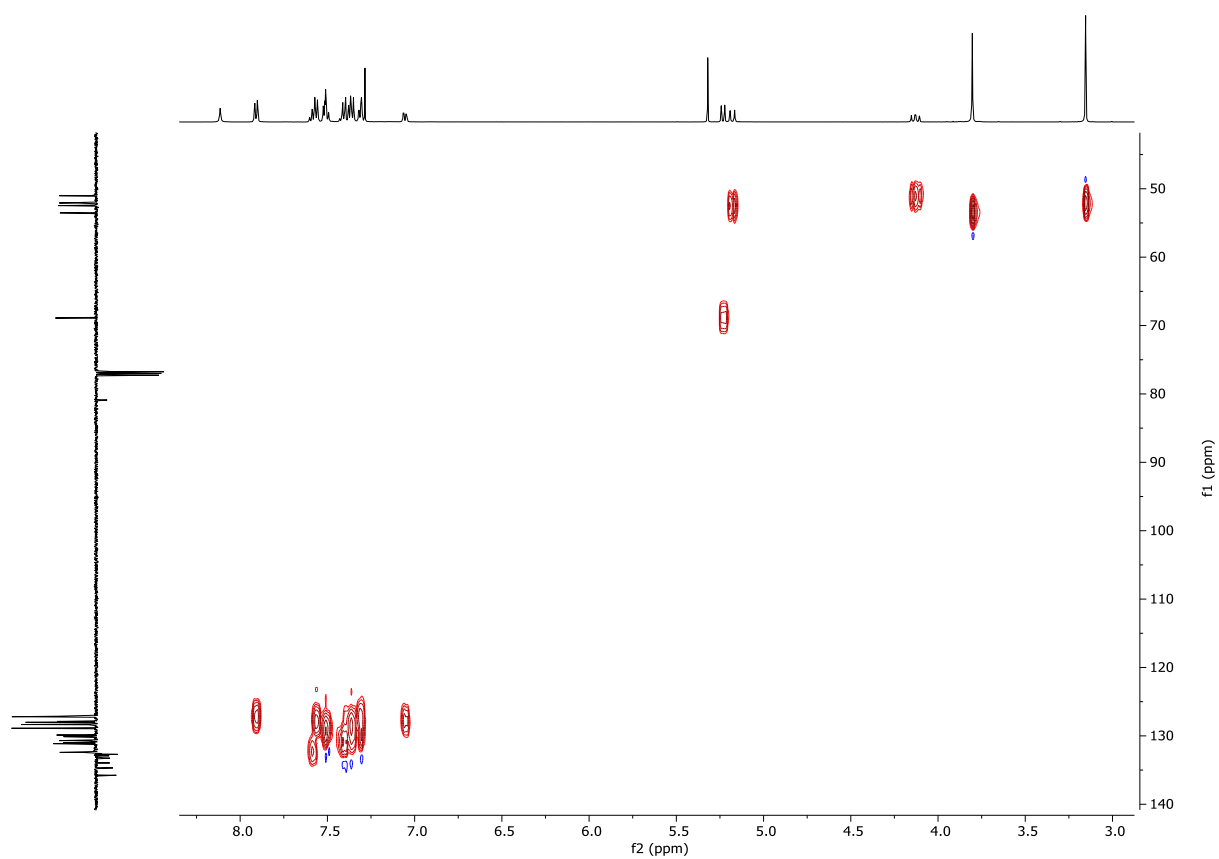

$^1\text{H}$ - $^{13}\text{C}$  HSQC ( $\text{CDCl}_3$ ) correlation spectrum of **3r**

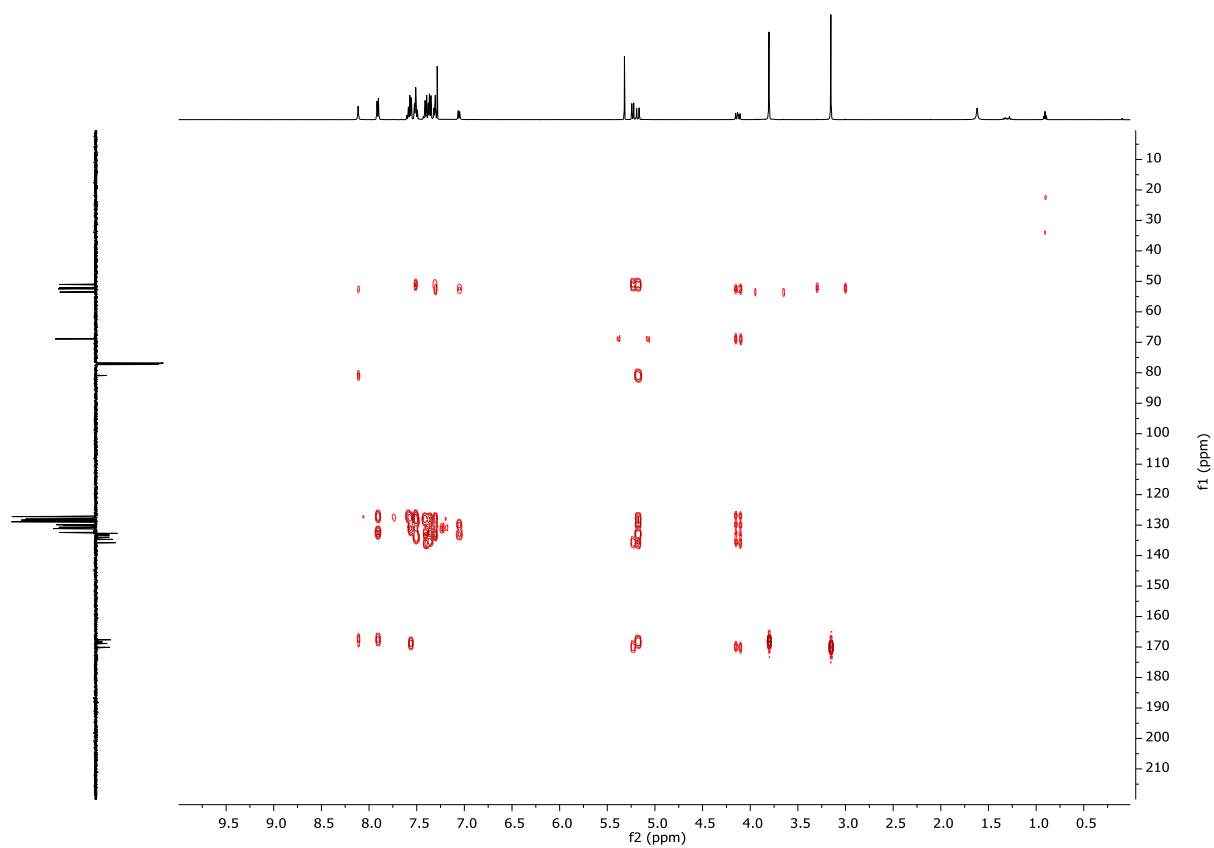

$^1\text{H}$ - $^{13}\text{C}$  HMBC ( $\text{CDCl}_3$ ) correlation spectrum of **3r**

## 7.- Cartesian coordinates and energies of the anionic species calculated by DFT methods

Table S1. Energies of the computed structures in Figure 12 of the manuscript

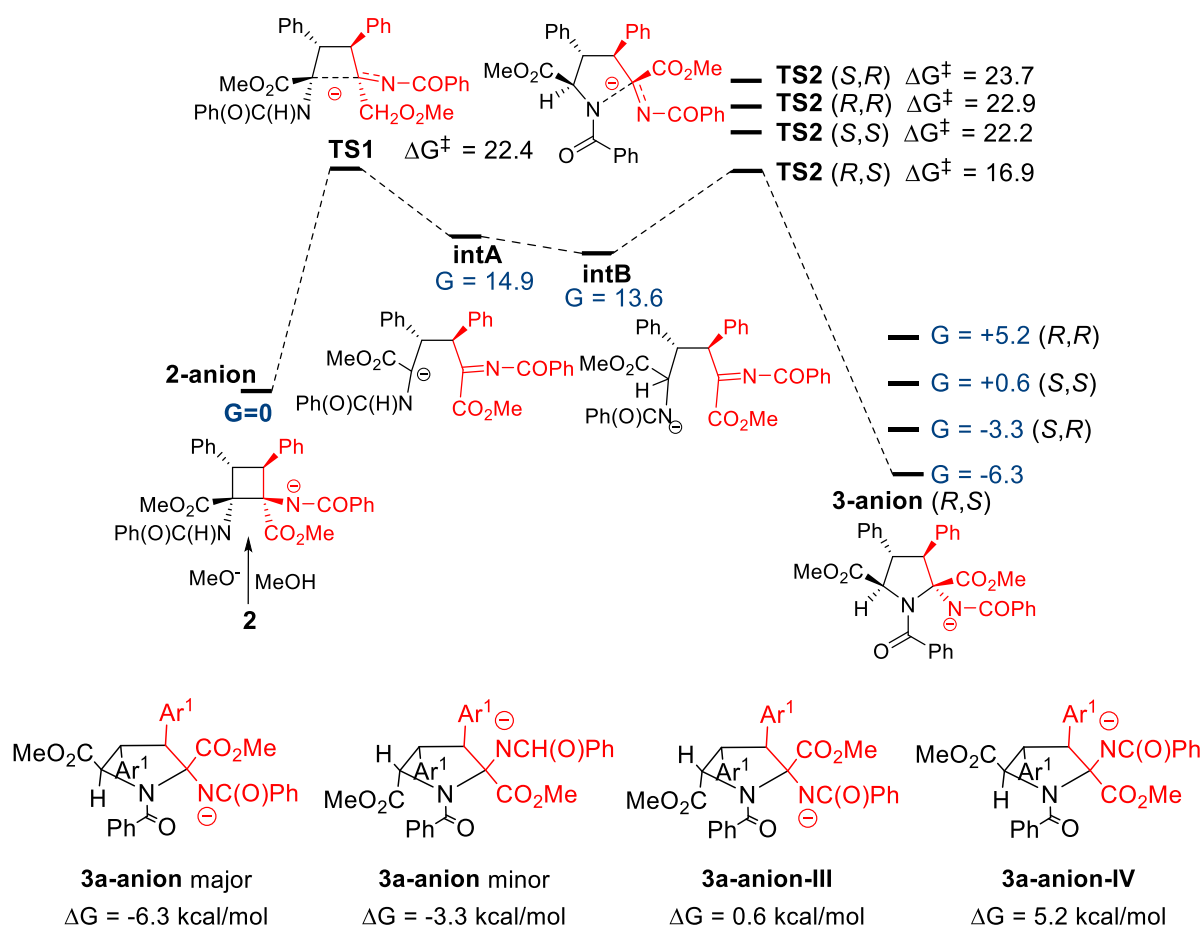

| Compound     | G (M06-2X)   | $\Delta G$<br>(kcal/mol) | Imaginary<br>Frequency |
|--------------|--------------|--------------------------|------------------------|
| 2a anion     | -1873.390565 | 0                        | --                     |
| TS1          | -1873.354863 | 22.4                     | -141.0                 |
| int A        | -1873.366774 | 14.9                     | --                     |
| int B        | -1873.368873 | 13.6                     | --                     |
| TS2 R,S      | -1873.363580 | 16.9                     | -42.0                  |
| TS2 S,S      | -1873.355178 | 22.2                     | -70.1                  |
| TS2 R,R      | -1873.354083 | 22.9                     | -145.8                 |
| TS2 S,R      | -1873.352851 | 23.7                     | -59.6                  |
| 3a anion R,S | -1873.400640 | -6.3                     | --                     |
| 3a anion S,R | -1873.395850 | -3.3                     | --                     |
| 3a anion S,S | -1873.389642 | 0.6                      | --                     |
| 3a anion R,R | -1873.382201 | 5.2                      | --                     |

Cartesian coordinates of the optimized structures are shown below:

### 2a Anion

Standard orientation:

| Center<br>Number | Atomic<br>Number | Atomic<br>Type | Coordinates (Angstroms) |           |           |
|------------------|------------------|----------------|-------------------------|-----------|-----------|
|                  |                  |                | X                       | Y         | Z         |
| 1                | 6                | 0              | 0.654666                | -0.434501 | -0.426514 |
| 2                | 6                | 0              | 0.353527                | 1.085837  | -0.726792 |
| 3                | 6                | 0              | -0.338979               | 1.170072  | 0.652360  |
| 4                | 6                | 0              | -0.553301               | -0.372823 | 0.591299  |
| 5                | 1                | 0              | 0.411320                | 1.343035  | 1.424141  |
| 6                | 6                | 0              | -1.520172               | 2.069186  | 0.870341  |
| 7                | 6                | 0              | -2.481781               | 2.286257  | -0.120695 |
| 8                | 6                | 0              | -1.700885               | 2.677951  | 2.116032  |
| 9                | 6                | 0              | -3.603927               | 3.070882  | 0.134896  |
| 10               | 1                | 0              | -2.365887               | 1.840980  | -1.102694 |
| 11               | 6                | 0              | -2.817214               | 3.465869  | 2.373874  |
| 12               | 1                | 0              | -0.959958               | 2.518245  | 2.892602  |
| 13               | 6                | 0              | -3.777517               | 3.660310  | 1.383422  |
| 14               | 1                | 0              | -4.341889               | 3.221631  | -0.644731 |
| 15               | 1                | 0              | -2.939079               | 3.927223  | 3.347081  |
| 16               | 1                | 0              | -4.650163               | 4.271522  | 1.581661  |
| 17               | 6                | 0              | 0.379453                | -1.373692 | -1.597498 |
| 18               | 8                | 0              | -0.223921               | -1.051820 | -2.599438 |
| 19               | 8                | 0              | 0.744248                | -2.626277 | -1.347601 |
| 20               | 6                | 0              | 0.487721                | -3.569629 | -2.391882 |
| 21               | 1                | 0              | 1.030878                | -3.284011 | -3.293068 |
| 22               | 1                | 0              | 0.844232                | -4.526277 | -2.020659 |
| 23               | 1                | 0              | -0.579708               | -3.617393 | -2.607985 |
| 24               | 6                | 0              | -0.319931               | -1.122616 | 1.891808  |
| 25               | 8                | 0              | 0.055362                | -0.609627 | 2.913860  |
| 26               | 8                | 0              | -0.542307               | -2.428060 | 1.753647  |
| 27               | 6                | 0              | -0.329037               | -3.219783 | 2.927114  |
| 28               | 1                | 0              | -0.994434               | -2.890677 | 3.725433  |
| 29               | 1                | 0              | -0.555475               | -4.242569 | 2.639969  |
| 30               | 1                | 0              | 0.706853                | -3.135177 | 3.255178  |
| 31               | 6                | 0              | 1.464535                | 2.038393  | -1.048078 |
| 32               | 6                | 0              | 1.503120                | 2.658598  | -2.300025 |
| 33               | 6                | 0              | 2.476854                | 2.331546  | -0.128185 |
| 34               | 6                | 0              | 2.531661                | 3.533150  | -2.637474 |
| 35               | 1                | 0              | 0.720460                | 2.444045  | -3.020978 |
| 36               | 6                | 0              | 3.509921                | 3.201605  | -0.464379 |
| 37               | 1                | 0              | 2.470395                | 1.856384  | 0.845474  |
| 38               | 6                | 0              | 3.543243                | 3.804010  | -1.719969 |
| 39               | 1                | 0              | 2.543418                | 4.001443  | -3.615044 |
| 40               | 1                | 0              | 4.291817                | 3.410188  | 0.257299  |
| 41               | 1                | 0              | 4.348164                | 4.482082  | -1.978804 |
| 42               | 1                | 0              | -0.391195               | 1.124683  | -1.523726 |
| 43               | 7                | 0              | -1.794915               | -0.765486 | -0.039001 |
| 44               | 7                | 0              | 1.875859                | -0.668469 | 0.274130  |
| 45               | 1                | 0              | -1.835932               | -0.744077 | -1.050007 |
| 46               | 6                | 0              | 2.921247                | -0.752478 | -0.525926 |
| 47               | 6                | 0              | -2.965286               | -0.780078 | 0.650138  |
| 48               | 8                | 0              | -3.010063               | -0.619182 | 1.861462  |
| 49               | 8                | 0              | 2.912109                | -0.730689 | -1.785837 |
| 50               | 6                | 0              | -4.199486               | -1.009889 | -0.169203 |
| 51               | 6                | 0              | -5.397930               | -0.473489 | 0.302622  |
| 52               | 6                | 0              | -4.183619               | -1.730428 | -1.364904 |
| 53               | 6                | 0              | -6.570451               | -0.641660 | -0.423786 |
| 54               | 1                | 0              | -5.393790               | 0.079574  | 1.234379  |
| 55               | 6                | 0              | -5.361424               | -1.907978 | -2.083958 |

|    |   |   |           |           |           |
|----|---|---|-----------|-----------|-----------|
| 56 | 1 | 0 | -3.265740 | -2.180954 | -1.727585 |
| 57 | 6 | 0 | -6.552975 | -1.359784 | -1.617610 |
| 58 | 1 | 0 | -7.497334 | -0.214503 | -0.060389 |
| 59 | 1 | 0 | -5.348329 | -2.478069 | -3.004891 |
| 60 | 1 | 0 | -7.468068 | -1.495337 | -2.181755 |
| 61 | 6 | 0 | 4.258386  | -0.888079 | 0.175595  |
| 62 | 6 | 0 | 5.401680  | -1.157907 | -0.577260 |
| 63 | 6 | 0 | 4.384144  | -0.720551 | 1.557539  |
| 64 | 6 | 0 | 6.647015  | -1.271583 | 0.035933  |
| 65 | 1 | 0 | 5.297498  | -1.276217 | -1.648953 |
| 66 | 6 | 0 | 5.627467  | -0.827657 | 2.172525  |
| 67 | 1 | 0 | 3.495172  | -0.503528 | 2.137276  |
| 68 | 6 | 0 | 6.763475  | -1.105747 | 1.413432  |
| 69 | 1 | 0 | 7.526449  | -1.486473 | -0.560605 |
| 70 | 1 | 0 | 5.713185  | -0.692640 | 3.244904  |
| 71 | 1 | 0 | 7.731904  | -1.190093 | 1.893091  |

### TS1

Standard orientation:

| Center<br>Number | Atomic<br>Number | Atomic<br>Type | Coordinates (Angstroms) |           |           |
|------------------|------------------|----------------|-------------------------|-----------|-----------|
|                  |                  |                | X                       | Y         | Z         |
| 1                | 6                | 0              | 1.111935                | -0.305994 | 1.106107  |
| 2                | 6                | 0              | 0.722587                | 0.825845  | 0.155659  |
| 3                | 6                | 0              | -0.718905               | 1.321443  | 0.348150  |
| 4                | 6                | 0              | -1.624003               | 0.074555  | 0.241488  |
| 5                | 1                | 0              | -0.838455               | 1.713515  | 1.359344  |
| 6                | 6                | 0              | -1.118419               | 2.392183  | -0.643647 |
| 7                | 6                | 0              | -1.813774               | 3.518756  | -0.200886 |
| 8                | 6                | 0              | -0.866244               | 2.259803  | -2.012050 |
| 9                | 6                | 0              | -2.248983               | 4.491308  | -1.097929 |
| 10               | 1                | 0              | -2.017022               | 3.633184  | 0.859551  |
| 11               | 6                | 0              | -1.295055               | 3.230778  | -2.911266 |
| 12               | 1                | 0              | -0.336981               | 1.390258  | -2.387916 |
| 13               | 6                | 0              | -1.989210               | 4.350225  | -2.457406 |
| 14               | 1                | 0              | -2.787177               | 5.358646  | -0.733488 |
| 15               | 1                | 0              | -1.089092               | 3.112321  | -3.968761 |
| 16               | 1                | 0              | -2.323146               | 5.105777  | -3.158721 |
| 17               | 6                | 0              | 1.004580                | -0.021881 | 2.593893  |
| 18               | 8                | 0              | 0.677149                | 1.048613  | 3.045162  |
| 19               | 8                | 0              | 1.357915                | -1.057696 | 3.340928  |
| 20               | 6                | 0              | 1.226546                | -0.871055 | 4.753802  |
| 21               | 1                | 0              | 0.189220                | -0.650290 | 5.006189  |
| 22               | 1                | 0              | 1.536757                | -1.809191 | 5.204572  |
| 23               | 1                | 0              | 1.865869                | -0.054884 | 5.089581  |
| 24               | 6                | 0              | -3.068489               | 0.508613  | 0.465476  |
| 25               | 8                | 0              | -3.548235               | 0.797465  | 1.535169  |
| 26               | 8                | 0              | -3.755059               | 0.565582  | -0.679508 |
| 27               | 6                | 0              | -5.122705               | 0.970973  | -0.567490 |
| 28               | 1                | 0              | -5.185976               | 1.973717  | -0.144012 |
| 29               | 1                | 0              | -5.520046               | 0.958003  | -1.578618 |
| 30               | 1                | 0              | -5.667402               | 0.268974  | 0.065062  |
| 31               | 6                | 0              | 1.791111                | 1.911446  | 0.217624  |
| 32               | 6                | 0              | 2.966065                | 1.730918  | -0.516454 |
| 33               | 6                | 0              | 1.647278                | 3.075279  | 0.974506  |
| 34               | 6                | 0              | 3.980716                | 2.682941  | -0.491036 |
| 35               | 1                | 0              | 3.088180                | 0.836187  | -1.120104 |
| 36               | 6                | 0              | 2.657397                | 4.032861  | 0.996401  |
| 37               | 1                | 0              | 0.748449                | 3.233040  | 1.556997  |
| 38               | 6                | 0              | 3.828034                | 3.839773  | 0.267542  |
| 39               | 1                | 0              | 4.883784                | 2.523519  | -1.068785 |
| 40               | 1                | 0              | 2.529068                | 4.932593  | 1.587014  |

|    |   |   |           |           |           |
|----|---|---|-----------|-----------|-----------|
| 41 | 1 | 0 | 4.612654  | 4.586936  | 0.287710  |
| 42 | 1 | 0 | 0.777821  | 0.385447  | -0.841929 |
| 43 | 7 | 0 | -1.149113 | -0.865057 | 1.230385  |
| 44 | 7 | 0 | 1.834883  | -1.305083 | 0.757429  |
| 45 | 6 | 0 | 1.926476  | -1.765264 | -0.539721 |
| 46 | 6 | 0 | -1.587079 | -2.113870 | 1.186058  |
| 47 | 8 | 0 | -1.188891 | -3.028593 | 1.941013  |
| 48 | 8 | 0 | 0.950022  | -2.015799 | -1.229227 |
| 49 | 6 | 0 | -2.676740 | -2.482599 | 0.193251  |
| 50 | 6 | 0 | -4.011570 | -2.486005 | 0.600396  |
| 51 | 6 | 0 | -2.358804 | -2.829222 | -1.120853 |
| 52 | 6 | 0 | -5.020486 | -2.826237 | -0.297314 |
| 53 | 1 | 0 | -4.260777 | -2.212964 | 1.620960  |
| 54 | 6 | 0 | -3.367851 | -3.175758 | -2.015838 |
| 55 | 1 | 0 | -1.320134 | -2.810468 | -1.434955 |
| 56 | 6 | 0 | -4.700469 | -3.171234 | -1.608012 |
| 57 | 1 | 0 | -6.055367 | -2.821448 | 0.026194  |
| 58 | 1 | 0 | -3.115182 | -3.445294 | -3.035209 |
| 59 | 1 | 0 | -5.484526 | -3.435738 | -2.307964 |
| 60 | 6 | 0 | 3.318134  | -2.032042 | -1.027263 |
| 61 | 6 | 0 | 3.493033  | -2.515491 | -2.325290 |
| 62 | 6 | 0 | 4.432574  | -1.768225 | -0.228102 |
| 63 | 6 | 0 | 4.772265  | -2.738041 | -2.819688 |
| 64 | 1 | 0 | 2.619229  | -2.710181 | -2.935148 |
| 65 | 6 | 0 | 5.712407  | -1.989623 | -0.725131 |
| 66 | 1 | 0 | 4.289182  | -1.393656 | 0.778192  |
| 67 | 6 | 0 | 5.882780  | -2.475045 | -2.019580 |
| 68 | 1 | 0 | 4.905790  | -3.114024 | -3.826912 |
| 69 | 1 | 0 | 6.575938  | -1.786228 | -0.103385 |
| 70 | 1 | 0 | 6.880574  | -2.648607 | -2.405261 |
| 71 | 1 | 0 | -1.555640 | -0.305433 | -0.785574 |

### Int A

Standard orientation:

| Center<br>Number | Atomic<br>Number | Atomic<br>Type | Coordinates (Angstroms) |           |           |
|------------------|------------------|----------------|-------------------------|-----------|-----------|
|                  |                  |                | X                       | Y         | Z         |
| 1                | 6                | 0              | 0.796142                | 0.084938  | -0.795724 |
| 2                | 6                | 0              | 0.731932                | -1.201244 | 0.114936  |
| 3                | 6                | 0              | -0.745640               | -1.608122 | 0.100921  |
| 4                | 6                | 0              | -1.445258               | -0.231355 | 0.135226  |
| 5                | 1                | 0              | -0.993062               | -2.064722 | -0.861171 |
| 6                | 6                | 0              | -1.152073               | -2.530431 | 1.221329  |
| 7                | 6                | 0              | -1.735119               | -3.766121 | 0.941292  |
| 8                | 6                | 0              | -0.952332               | -2.165629 | 2.556915  |
| 9                | 6                | 0              | -2.111624               | -4.625635 | 1.971581  |
| 10               | 1                | 0              | -1.894836               | -4.057783 | -0.091841 |
| 11               | 6                | 0              | -1.328199               | -3.020820 | 3.586393  |
| 12               | 1                | 0              | -0.502629               | -1.205226 | 2.791771  |
| 13               | 6                | 0              | -1.908707               | -4.254692 | 3.296365  |
| 14               | 1                | 0              | -2.562250               | -5.582951 | 1.737144  |
| 15               | 1                | 0              | -1.168760               | -2.725465 | 4.616874  |
| 16               | 1                | 0              | -2.200594               | -4.920711 | 4.099722  |
| 17               | 6                | 0              | 1.069285                | -0.384585 | -2.236722 |
| 18               | 8                | 0              | 0.229546                | -0.901875 | -2.934475 |
| 19               | 8                | 0              | 2.341773                | -0.272843 | -2.599678 |
| 20               | 6                | 0              | 2.675098                | -0.867811 | -3.858415 |
| 21               | 1                | 0              | 2.108444                | -0.399347 | -4.662725 |
| 22               | 1                | 0              | 3.739646                | -0.696950 | -3.992229 |
| 23               | 1                | 0              | 2.458866                | -1.936798 | -3.831863 |
| 24               | 6                | 0              | -2.880608               | -0.382498 | -0.336987 |
| 25               | 8                | 0              | -3.226031               | -0.585572 | -1.472909 |

|    |   |   |           |           |           |
|----|---|---|-----------|-----------|-----------|
| 26 | 8 | 0 | -3.721915 | -0.322439 | 0.693304  |
| 27 | 6 | 0 | -5.112492 | -0.457170 | 0.370447  |
| 28 | 1 | 0 | -5.300482 | -1.424931 | -0.093557 |
| 29 | 1 | 0 | -5.643438 | -0.375215 | 1.314157  |
| 30 | 1 | 0 | -5.409822 | 0.342904  | -0.308309 |
| 31 | 6 | 0 | 1.732793  | -2.275012 | -0.231089 |
| 32 | 6 | 0 | 2.983907  | -2.251218 | 0.392384  |
| 33 | 6 | 0 | 1.477559  | -3.275086 | -1.173730 |
| 34 | 6 | 0 | 3.962003  | -3.187441 | 0.073062  |
| 35 | 1 | 0 | 3.188877  | -1.482219 | 1.130303  |
| 36 | 6 | 0 | 2.453176  | -4.216672 | -1.492253 |
| 37 | 1 | 0 | 0.518180  | -3.320208 | -1.675919 |
| 38 | 6 | 0 | 3.699334  | -4.174103 | -0.873864 |
| 39 | 1 | 0 | 4.926659  | -3.148856 | 0.565694  |
| 40 | 1 | 0 | 2.237158  | -4.984952 | -2.225773 |
| 41 | 1 | 0 | 4.457479  | -4.907102 | -1.123373 |
| 42 | 1 | 0 | 0.962557  | -0.828977 | 1.113530  |
| 43 | 7 | 0 | -0.608119 | 0.564314  | -0.747566 |
| 44 | 7 | 0 | 1.775511  | 1.028090  | -0.358416 |
| 45 | 6 | 0 | 1.568885  | 1.588097  | 0.817244  |
| 46 | 6 | 0 | -0.965082 | 1.685541  | -1.416007 |
| 47 | 8 | 0 | -0.270451 | 2.168378  | -2.304822 |
| 48 | 8 | 0 | 0.604151  | 1.415789  | 1.613189  |
| 49 | 6 | 0 | -2.239663 | 2.355868  | -0.991450 |
| 50 | 6 | 0 | -3.177836 | 2.736680  | -1.950388 |
| 51 | 6 | 0 | -2.445987 | 2.660297  | 0.353738  |
| 52 | 6 | 0 | -4.338020 | 3.393516  | -1.559259 |
| 53 | 1 | 0 | -2.998799 | 2.502600  | -2.993526 |
| 54 | 6 | 0 | -3.599997 | 3.338315  | 0.739305  |
| 55 | 1 | 0 | -1.691214 | 2.377715  | 1.082205  |
| 56 | 6 | 0 | -4.549420 | 3.694561  | -0.213698 |
| 57 | 1 | 0 | -5.076877 | 3.674057  | -2.300489 |
| 58 | 1 | 0 | -3.757377 | 3.585578  | 1.782468  |
| 59 | 1 | 0 | -5.452551 | 4.211754  | 0.088545  |
| 60 | 6 | 0 | 2.653251  | 2.567144  | 1.244616  |
| 61 | 6 | 0 | 2.536359  | 3.219051  | 2.472800  |
| 62 | 6 | 0 | 3.767983  | 2.834179  | 0.445169  |
| 63 | 6 | 0 | 3.510370  | 4.119651  | 2.897755  |
| 64 | 1 | 0 | 1.669652  | 3.007578  | 3.086949  |
| 65 | 6 | 0 | 4.743605  | 3.732075  | 0.866310  |
| 66 | 1 | 0 | 3.852108  | 2.327738  | -0.507964 |
| 67 | 6 | 0 | 4.618115  | 4.378706  | 2.095214  |
| 68 | 1 | 0 | 3.405176  | 4.619018  | 3.854401  |
| 69 | 1 | 0 | 5.603415  | 3.930382  | 0.236191  |
| 70 | 1 | 0 | 5.377782  | 5.079112  | 2.422957  |
| 71 | 1 | 0 | -1.432058 | 0.167798  | 1.150345  |

## Int B

Standard orientation:

| Center<br>Number | Atomic<br>Number | Atomic<br>Type | Coordinates (Angstroms) |           |           |
|------------------|------------------|----------------|-------------------------|-----------|-----------|
|                  |                  |                | X                       | Y         | Z         |
| 1                | 6                | 0              | 0.237332                | 0.289552  | 0.351005  |
| 2                | 6                | 0              | -1.089634               | -0.525207 | 0.544453  |
| 3                | 6                | 0              | -1.847991               | -0.258236 | -0.756515 |
| 4                | 6                | 0              | -1.632827               | 1.257257  | -0.939371 |
| 5                | 1                | 0              | -1.314708               | -0.738390 | -1.580781 |
| 6                | 6                | 0              | -3.293703               | -0.694933 | -0.796045 |
| 7                | 6                | 0              | -4.120506               | -0.634902 | 0.329253  |
| 8                | 6                | 0              | -3.841558               | -1.127860 | -2.005043 |
| 9                | 6                | 0              | -5.464858               | -0.985736 | 0.240691  |
| 10               | 1                | 0              | -3.721679               | -0.309414 | 1.283788  |

S114

|    |   |   |           |           |           |
|----|---|---|-----------|-----------|-----------|
| 11 | 6 | 0 | -5.184737 | -1.480487 | -2.096632 |
| 12 | 1 | 0 | -3.207647 | -1.184520 | -2.884273 |
| 13 | 6 | 0 | -6.002349 | -1.406885 | -0.972482 |
| 14 | 1 | 0 | -6.091884 | -0.932634 | 1.123191  |
| 15 | 1 | 0 | -5.591071 | -1.813847 | -3.044426 |
| 16 | 1 | 0 | -7.048427 | -1.681409 | -1.039482 |
| 17 | 6 | 0 | 0.704287  | 0.781699  | 1.751211  |
| 18 | 8 | 0 | 0.036073  | 0.718026  | 2.754930  |
| 19 | 8 | 0 | 1.896437  | 1.360407  | 1.709542  |
| 20 | 6 | 0 | 2.397477  | 1.869379  | 2.945072  |
| 21 | 1 | 0 | 2.528016  | 1.054964  | 3.658895  |
| 22 | 1 | 0 | 3.353841  | 2.327700  | 2.706149  |
| 23 | 1 | 0 | 1.712981  | 2.611384  | 3.357592  |
| 24 | 6 | 0 | -2.669931 | 2.069429  | -0.177552 |
| 25 | 8 | 0 | -2.609309 | 2.351480  | 0.992149  |
| 26 | 8 | 0 | -3.699251 | 2.379835  | -0.964334 |
| 27 | 6 | 0 | -4.814466 | 3.004838  | -0.317014 |
| 28 | 1 | 0 | -4.508287 | 3.946536  | 0.137176  |
| 29 | 1 | 0 | -5.550151 | 3.177627  | -1.097038 |
| 30 | 1 | 0 | -5.216608 | 2.338838  | 0.447419  |
| 31 | 6 | 0 | -0.935445 | -1.983344 | 0.885950  |
| 32 | 6 | 0 | -1.213856 | -2.417868 | 2.182619  |
| 33 | 6 | 0 | -0.542177 | -2.928040 | -0.065736 |
| 34 | 6 | 0 | -1.073583 | -3.756740 | 2.535063  |
| 35 | 1 | 0 | -1.523070 | -1.689689 | 2.925335  |
| 36 | 6 | 0 | -0.395477 | -4.267297 | 0.283653  |
| 37 | 1 | 0 | -0.323099 | -2.614330 | -1.079320 |
| 38 | 6 | 0 | -0.656184 | -4.686334 | 1.586203  |
| 39 | 1 | 0 | -1.288042 | -4.073611 | 3.549382  |
| 40 | 1 | 0 | -0.078398 | -4.986010 | -0.463674 |
| 41 | 1 | 0 | -0.542263 | -5.729704 | 1.856881  |
| 42 | 1 | 0 | -1.620947 | -0.035490 | 1.361447  |
| 43 | 7 | 0 | -0.287370 | 1.469490  | -0.424311 |
| 44 | 7 | 0 | 1.224486  | -0.395264 | -0.416508 |
| 45 | 6 | 0 | 2.010096  | -1.212336 | 0.256218  |
| 46 | 6 | 0 | 0.249823  | 2.690355  | -0.704121 |
| 47 | 8 | 0 | -0.471569 | 3.575516  | -1.165605 |
| 48 | 8 | 0 | 2.004313  | -1.440420 | 1.493848  |
| 49 | 6 | 0 | 1.708108  | 2.975553  | -0.513981 |
| 50 | 6 | 0 | 2.061568  | 4.130289  | 0.183753  |
| 51 | 6 | 0 | 2.691527  | 2.184250  | -1.102641 |
| 52 | 6 | 0 | 3.401146  | 4.468342  | 0.335662  |
| 53 | 1 | 0 | 1.284643  | 4.749534  | 0.617882  |
| 54 | 6 | 0 | 4.030578  | 2.540749  | -0.971176 |
| 55 | 1 | 0 | 2.405835  | 1.281608  | -1.626317 |
| 56 | 6 | 0 | 4.388274  | 3.672313  | -0.242648 |
| 57 | 1 | 0 | 3.675385  | 5.352948  | 0.898395  |
| 58 | 1 | 0 | 4.796665  | 1.928390  | -1.433074 |
| 59 | 1 | 0 | 5.433096  | 3.938333  | -0.131186 |
| 60 | 6 | 0 | 3.037317  | -1.939603 | -0.593876 |
| 61 | 6 | 0 | 3.919562  | -2.830640 | 0.018661  |
| 62 | 6 | 0 | 3.128117  | -1.745739 | -1.975101 |
| 63 | 6 | 0 | 4.875932  | -3.513648 | -0.728767 |
| 64 | 1 | 0 | 3.842245  | -2.976502 | 1.089148  |
| 65 | 6 | 0 | 4.082576  | -2.425722 | -2.725310 |
| 66 | 1 | 0 | 2.438525  | -1.058574 | -2.449370 |
| 67 | 6 | 0 | 4.960656  | -3.312594 | -2.103958 |
| 68 | 1 | 0 | 5.554813  | -4.202716 | -0.239043 |
| 69 | 1 | 0 | 4.142472  | -2.265906 | -3.796054 |
| 70 | 1 | 0 | 5.703964  | -3.842909 | -2.688183 |
| 71 | 1 | 0 | -1.690139 | 1.550335  | -1.987945 |

TS2 R,S

S115



Standard orientation:

| Center | Atomic | Atomic | Atomic    | Coordinates (Angstroms) |           |      |
|--------|--------|--------|-----------|-------------------------|-----------|------|
|        |        |        |           | Number                  | Number    | Type |
| 1      | 6      | 0      | 1.111935  | -0.305994               | 1.106107  |      |
| 2      | 6      | 0      | 0.722587  | 0.825845                | 0.155659  |      |
| 3      | 6      | 0      | -0.718905 | 1.321443                | 0.348150  |      |
| 4      | 6      | 0      | -1.624003 | 0.074555                | 0.241488  |      |
| 5      | 1      | 0      | -0.838455 | 1.713515                | 1.359344  |      |
| 6      | 6      | 0      | -1.118419 | 2.392183                | -0.643647 |      |
| 7      | 6      | 0      | -1.813774 | 3.518756                | -0.200886 |      |
| 8      | 6      | 0      | -0.866244 | 2.259803                | -2.012050 |      |
| 9      | 6      | 0      | -2.248983 | 4.491308                | -1.097929 |      |
| 10     | 1      | 0      | -2.017022 | 3.633184                | 0.859551  |      |
| 11     | 6      | 0      | -1.295055 | 3.230778                | -2.911266 |      |
| 12     | 1      | 0      | -0.336981 | 1.390258                | -2.387916 |      |
| 13     | 6      | 0      | -1.989210 | 4.350225                | -2.457406 |      |
| 14     | 1      | 0      | -2.787177 | 5.358646                | -0.733488 |      |
| 15     | 1      | 0      | -1.089092 | 3.112321                | -3.968761 |      |
| 16     | 1      | 0      | -2.323146 | 5.105777                | -3.158721 |      |
| 17     | 6      | 0      | 1.004580  | -0.021881               | 2.593893  |      |
| 18     | 8      | 0      | 0.677149  | 1.048613                | 3.045162  |      |
| 19     | 8      | 0      | 1.357915  | -1.057696               | 3.340928  |      |
| 20     | 6      | 0      | 1.226546  | -0.871055               | 4.753802  |      |
| 21     | 1      | 0      | 0.189220  | -0.650290               | 5.006189  |      |
| 22     | 1      | 0      | 1.536757  | -1.809191               | 5.204572  |      |
| 23     | 1      | 0      | 1.865869  | -0.054884               | 5.089581  |      |
| 24     | 6      | 0      | -3.068489 | 0.508613                | 0.465476  |      |
| 25     | 8      | 0      | -3.548235 | 0.797465                | 1.535169  |      |
| 26     | 8      | 0      | -3.755059 | 0.565582                | -0.679508 |      |
| 27     | 6      | 0      | -5.122705 | 0.970973                | -0.567490 |      |
| 28     | 1      | 0      | -5.185976 | 1.973717                | -0.144012 |      |
| 29     | 1      | 0      | -5.520046 | 0.958003                | -1.578618 |      |
| 30     | 1      | 0      | -5.667402 | 0.268974                | 0.065062  |      |
| 31     | 6      | 0      | 1.791111  | 1.911446                | 0.217624  |      |
| 32     | 6      | 0      | 2.966065  | 1.730918                | -0.516454 |      |
| 33     | 6      | 0      | 1.647278  | 3.075279                | 0.974506  |      |
| 34     | 6      | 0      | 3.980716  | 2.682941                | -0.491036 |      |
| 35     | 1      | 0      | 3.088180  | 0.836187                | -1.120104 |      |
| 36     | 6      | 0      | 2.657397  | 4.032861                | 0.996401  |      |
| 37     | 1      | 0      | 0.748449  | 3.233040                | 1.556997  |      |
| 38     | 6      | 0      | 3.828034  | 3.839773                | 0.267542  |      |
| 39     | 1      | 0      | 4.883784  | 2.523519                | -1.068785 |      |
| 40     | 1      | 0      | 2.529068  | 4.932593                | 1.587014  |      |
| 41     | 1      | 0      | 4.612654  | 4.586936                | 0.287710  |      |
| 42     | 1      | 0      | 0.777821  | 0.385447                | -0.841929 |      |
| 43     | 7      | 0      | -1.149113 | -0.865057               | 1.230385  |      |
| 44     | 7      | 0      | 1.834883  | -1.305083               | 0.757429  |      |
| 45     | 6      | 0      | 1.926476  | -1.765264               | -0.539721 |      |
| 46     | 6      | 0      | -1.587079 | -2.113870               | 1.186058  |      |
| 47     | 8      | 0      | -1.188891 | -3.028593               | 1.941013  |      |
| 48     | 8      | 0      | 0.950022  | -2.015799               | -1.229227 |      |
| 49     | 6      | 0      | -2.676740 | -2.482599               | 0.193251  |      |
| 50     | 6      | 0      | -4.011570 | -2.486005               | 0.600396  |      |
| 51     | 6      | 0      | -2.358804 | -2.829222               | -1.120853 |      |
| 52     | 6      | 0      | -5.020486 | -2.826237               | -0.297314 |      |
| 53     | 1      | 0      | -4.260777 | -2.212964               | 1.620960  |      |
| 54     | 6      | 0      | -3.367851 | -3.175758               | -2.015838 |      |
| 55     | 1      | 0      | -1.320134 | -2.810468               | -1.434955 |      |
| 56     | 6      | 0      | -4.700469 | -3.171234               | -1.608012 |      |
| 57     | 1      | 0      | -6.055367 | -2.821448               | 0.026194  |      |
| 58     | 1      | 0      | -3.115182 | -3.445294               | -3.035209 |      |
| 59     | 1      | 0      | -5.484526 | -3.435738               | -2.307964 |      |

|    |   |   |           |           |           |
|----|---|---|-----------|-----------|-----------|
| 60 | 6 | 0 | 3.318134  | -2.032042 | -1.027263 |
| 61 | 6 | 0 | 3.493033  | -2.515491 | -2.325290 |
| 62 | 6 | 0 | 4.432574  | -1.768225 | -0.228102 |
| 63 | 6 | 0 | 4.772265  | -2.738041 | -2.819688 |
| 64 | 1 | 0 | 2.619229  | -2.710181 | -2.935148 |
| 65 | 6 | 0 | 5.712407  | -1.989623 | -0.725131 |
| 66 | 1 | 0 | 4.289182  | -1.393656 | 0.778192  |
| 67 | 6 | 0 | 5.882780  | -2.475045 | -2.019580 |
| 68 | 1 | 0 | 4.905790  | -3.114024 | -3.826912 |
| 69 | 1 | 0 | 6.575938  | -1.786228 | -0.103385 |
| 70 | 1 | 0 | 6.880574  | -2.648607 | -2.405261 |
| 71 | 1 | 0 | -1.555640 | -0.305433 | -0.785574 |

-----

### TS2 S,S

Standard orientation:

| Center<br>Number | Atomic<br>Number | Atomic<br>Type | Coordinates (Angstroms) |           |           |
|------------------|------------------|----------------|-------------------------|-----------|-----------|
|                  |                  |                | X                       | Y         | Z         |
| 1                | 6                | 0              | -0.527964               | -1.111680 | -0.131364 |
| 2                | 6                | 0              | -0.551349               | 0.419081  | -0.263795 |
| 3                | 6                | 0              | 0.797408                | 1.016543  | -0.677079 |
| 4                | 6                | 0              | 1.892977                | 0.408683  | 0.260327  |
| 5                | 1                | 0              | 1.044833                | 0.661074  | -1.676365 |
| 6                | 6                | 0              | 0.832553                | 2.530518  | -0.702757 |
| 7                | 6                | 0              | 1.696588                | 3.166137  | -1.598475 |
| 8                | 6                | 0              | 0.085307                | 3.323312  | 0.173303  |
| 9                | 6                | 0              | 1.822301                | 4.551772  | -1.616277 |
| 10               | 1                | 0              | 2.279201                | 2.563426  | -2.288452 |
| 11               | 6                | 0              | 0.206214                | 4.710537  | 0.157260  |
| 12               | 1                | 0              | -0.597734               | 2.863274  | 0.878507  |
| 13               | 6                | 0              | 1.076997                | 5.329907  | -0.734727 |
| 14               | 1                | 0              | 2.499413                | 5.022809  | -2.319387 |
| 15               | 1                | 0              | -0.383511               | 5.307692  | 0.843308  |
| 16               | 1                | 0              | 1.170274                | 6.409433  | -0.745896 |
| 17               | 6                | 0              | -0.043438               | -1.946852 | -1.324381 |
| 18               | 8                | 0              | 0.712869                | -1.549305 | -2.178663 |
| 19               | 8                | 0              | -0.601318               | -3.149679 | -1.361563 |
| 20               | 6                | 0              | -0.099392               | -4.021614 | -2.377801 |
| 21               | 1                | 0              | 0.973240                | -4.161905 | -2.240947 |
| 22               | 1                | 0              | -0.627876               | -4.961725 | -2.246856 |
| 23               | 1                | 0              | -0.295045               | -3.607939 | -3.366884 |
| 24               | 6                | 0              | -1.702557               | 0.835855  | -1.160155 |
| 25               | 6                | 0              | -2.866180               | 1.352302  | -0.586400 |
| 26               | 6                | 0              | -1.646829               | 0.694079  | -2.550052 |
| 27               | 6                | 0              | -3.955551               | 1.711070  | -1.375112 |
| 28               | 1                | 0              | -2.920303               | 1.473602  | 0.491383  |
| 29               | 6                | 0              | -2.735246               | 1.051275  | -3.341017 |
| 30               | 1                | 0              | -0.750974               | 0.300502  | -3.016913 |
| 31               | 6                | 0              | -3.893943               | 1.557841  | -2.756867 |
| 32               | 1                | 0              | -4.849665               | 2.109737  | -0.909498 |
| 33               | 1                | 0              | -2.677425               | 0.934618  | -4.417096 |
| 34               | 1                | 0              | -4.739403               | 1.835594  | -3.375226 |
| 35               | 1                | 0              | -0.772881               | 0.756921  | 0.750732  |
| 36               | 7                | 0              | 1.472296                | -0.933520 | 0.578300  |
| 37               | 7                | 0              | -1.412712               | -1.707858 | 0.603371  |
| 38               | 6                | 0              | -2.133609               | -1.162488 | 1.625278  |
| 39               | 6                | 0              | 2.286599                | -1.972919 | 0.426224  |
| 40               | 8                | 0              | 1.880731                | -3.151620 | 0.388215  |
| 41               | 8                | 0              | -1.663876               | -0.685855 | 2.651291  |
| 42               | 6                | 0              | 3.781039                | -1.764034 | 0.281463  |
| 43               | 6                | 0              | 4.439348                | -2.345597 | -0.802855 |
| 44               | 6                | 0              | 4.518430                | -1.051612 | 1.226687  |

|    |   |   |           |           |           |
|----|---|---|-----------|-----------|-----------|
| 45 | 6 | 0 | 5.815075  | -2.199954 | -0.951345 |
| 46 | 1 | 0 | 3.864008  | -2.910037 | -1.528479 |
| 47 | 6 | 0 | 5.898649  | -0.924933 | 1.092432  |
| 48 | 1 | 0 | 4.014901  | -0.602521 | 2.075936  |
| 49 | 6 | 0 | 6.548130  | -1.492295 | -0.000732 |
| 50 | 1 | 0 | 6.316731  | -2.642711 | -1.804075 |
| 51 | 1 | 0 | 6.465489  | -0.381006 | 1.839104  |
| 52 | 1 | 0 | 7.621023  | -1.386122 | -0.110488 |
| 53 | 6 | 0 | -3.628934 | -1.265318 | 1.452610  |
| 54 | 6 | 0 | -4.457822 | -0.713817 | 2.430237  |
| 55 | 6 | 0 | -4.194256 | -1.840320 | 0.312801  |
| 56 | 6 | 0 | -5.839086 | -0.733866 | 2.270732  |
| 57 | 1 | 0 | -4.006304 | -0.264460 | 3.306528  |
| 58 | 6 | 0 | -5.575765 | -1.862266 | 0.154035  |
| 59 | 1 | 0 | -3.542717 | -2.261199 | -0.443914 |
| 60 | 6 | 0 | -6.399575 | -1.307621 | 1.131233  |
| 61 | 1 | 0 | -6.478560 | -0.301054 | 3.031010  |
| 62 | 1 | 0 | -6.010870 | -2.308963 | -0.732229 |
| 63 | 1 | 0 | -7.475975 | -1.322180 | 1.005188  |
| 64 | 6 | 0 | 2.082856  | 1.295356  | 1.485567  |
| 65 | 8 | 0 | 3.049633  | 1.998487  | 1.667682  |
| 66 | 8 | 0 | 1.050968  | 1.247434  | 2.325583  |
| 67 | 6 | 0 | 1.111174  | 2.130116  | 3.450426  |
| 68 | 1 | 0 | 1.158866  | 3.165060  | 3.108014  |
| 69 | 1 | 0 | 0.197600  | 1.955143  | 4.011833  |
| 70 | 1 | 0 | 1.984873  | 1.906225  | 4.061965  |
| 71 | 1 | 0 | 2.848752  | 0.457470  | -0.269397 |

-----

**TS2 R,R**

Standard orientation:

-----

| Center<br>Number | Atomic<br>Number | Atomic<br>Type | Coordinates (Angstroms) |           |           |
|------------------|------------------|----------------|-------------------------|-----------|-----------|
|                  |                  |                | X                       | Y         | Z         |
| 1                | 6                | 0              | -0.415207               | -1.445818 | -0.938484 |
| 2                | 6                | 0              | -0.812465               | -1.032571 | 0.494408  |
| 3                | 6                | 0              | -0.533281               | 0.468871  | 0.668306  |
| 4                | 6                | 0              | 0.952353                | 0.619210  | 0.272259  |
| 5                | 1                | 0              | -1.138789               | 1.044051  | -0.034770 |
| 6                | 6                | 0              | -0.842505               | 0.958897  | 2.066773  |
| 7                | 6                | 0              | -1.738840               | 2.009558  | 2.264778  |
| 8                | 6                | 0              | -0.254065               | 0.365018  | 3.186089  |
| 9                | 6                | 0              | -2.046658               | 2.456433  | 3.546238  |
| 10               | 1                | 0              | -2.191878               | 2.487240  | 1.401401  |
| 11               | 6                | 0              | -0.557536               | 0.808190  | 4.470304  |
| 12               | 1                | 0              | 0.449375                | -0.452957 | 3.061887  |
| 13               | 6                | 0              | -1.456984               | 1.854902  | 4.654887  |
| 14               | 1                | 0              | -2.745516               | 3.274250  | 3.678886  |
| 15               | 1                | 0              | -0.091612               | 0.334802  | 5.326775  |
| 16               | 1                | 0              | -1.694757               | 2.199700  | 5.654301  |
| 17               | 6                | 0              | 0.348259                | -2.777859 | -0.991939 |
| 18               | 8                | 0              | 0.865815                | -3.284506 | -0.024460 |
| 19               | 8                | 0              | 0.343990                | -3.331648 | -2.192631 |
| 20               | 6                | 0              | 1.151975                | -4.504705 | -2.326982 |
| 21               | 1                | 0              | 0.791775                | -5.291756 | -1.664839 |
| 22               | 1                | 0              | 1.058904                | -4.809272 | -3.365657 |
| 23               | 1                | 0              | 2.186282                | -4.258509 | -2.087777 |
| 24               | 6                | 0              | -2.218847               | -1.480338 | 0.832134  |
| 25               | 6                | 0              | -2.413278               | -2.780348 | 1.306668  |
| 26               | 6                | 0              | -3.331518               | -0.653559 | 0.674260  |
| 27               | 6                | 0              | -3.688593               | -3.248482 | 1.607748  |
| 28               | 1                | 0              | -1.551906               | -3.427432 | 1.441356  |
| 29               | 6                | 0              | -4.608445               | -1.116315 | 0.978391  |

|    |   |   |           |           |           |
|----|---|---|-----------|-----------|-----------|
| 30 | 1 | 0 | -3.211745 | 0.359790  | 0.307460  |
| 31 | 6 | 0 | -4.792013 | -2.415312 | 1.444067  |
| 32 | 1 | 0 | -3.819486 | -4.259832 | 1.974830  |
| 33 | 1 | 0 | -5.461585 | -0.460089 | 0.850333  |
| 34 | 1 | 0 | -5.786709 | -2.773804 | 1.681596  |
| 35 | 1 | 0 | -0.128106 | -1.569800 | 1.155257  |
| 36 | 7 | 0 | 1.223232  | -0.351421 | -0.757987 |
| 37 | 7 | 0 | -1.187418 | -1.238512 | -1.969939 |
| 38 | 6 | 0 | -2.097257 | -0.288593 | -2.279567 |
| 39 | 6 | 0 | 2.443003  | -0.859270 | -0.943563 |
| 40 | 8 | 0 | 2.723205  | -1.608706 | -1.894683 |
| 41 | 8 | 0 | -3.276338 | -0.552626 | -2.514983 |
| 42 | 6 | 0 | 3.528532  | -0.614302 | 0.083179  |
| 43 | 6 | 0 | 4.638914  | 0.179299  | -0.195446 |
| 44 | 6 | 0 | 3.445185  | -1.281511 | 1.306527  |
| 45 | 6 | 0 | 5.655358  | 0.311698  | 0.746607  |
| 46 | 1 | 0 | 4.697664  | 0.700157  | -1.143884 |
| 47 | 6 | 0 | 4.465610  | -1.154942 | 2.245274  |
| 48 | 1 | 0 | 2.580459  | -1.907153 | 1.509525  |
| 49 | 6 | 0 | 5.571210  | -0.354825 | 1.967347  |
| 50 | 1 | 0 | 6.514576  | 0.935454  | 0.528441  |
| 51 | 1 | 0 | 4.398118  | -1.680100 | 3.191055  |
| 52 | 1 | 0 | 6.364671  | -0.251630 | 2.698234  |
| 53 | 6 | 0 | -1.625436 | 1.127281  | -2.506490 |
| 54 | 6 | 0 | -2.545279 | 2.167342  | -2.350848 |
| 55 | 6 | 0 | -0.315856 | 1.412311  | -2.891745 |
| 56 | 6 | 0 | -2.157463 | 3.483815  | -2.569272 |
| 57 | 1 | 0 | -3.561255 | 1.929006  | -2.058046 |
| 58 | 6 | 0 | 0.063445  | 2.730028  | -3.136380 |
| 59 | 1 | 0 | 0.397690  | 0.603471  | -2.992870 |
| 60 | 6 | 0 | -0.853215 | 3.764805  | -2.973567 |
| 61 | 1 | 0 | -2.870617 | 4.288780  | -2.435293 |
| 62 | 1 | 0 | 1.079962  | 2.948238  | -3.442178 |
| 63 | 1 | 0 | -0.552606 | 4.790063  | -3.158041 |
| 64 | 1 | 0 | 1.559775  | 0.456932  | 1.175092  |
| 65 | 6 | 0 | 1.345908  | 2.023357  | -0.185601 |
| 66 | 8 | 0 | 2.317634  | 2.263074  | -0.856824 |
| 67 | 8 | 0 | 0.537062  | 2.967665  | 0.298475  |
| 68 | 6 | 0 | 0.922798  | 4.322374  | 0.036981  |
| 69 | 1 | 0 | 0.123092  | 4.939353  | 0.437950  |
| 70 | 1 | 0 | 1.864874  | 4.543098  | 0.539618  |
| 71 | 1 | 0 | 1.030852  | 4.483628  | -1.034348 |

## TS2 S,R

Standard orientation:

| Center Number | Atomic Number | Atomic Type | Coordinates (Angstroms) |           |           |
|---------------|---------------|-------------|-------------------------|-----------|-----------|
|               |               |             | X                       | Y         | Z         |
| 1             | 6             | 0           | 0.712882                | -1.648271 | -0.518734 |
| 2             | 6             | 0           | 1.406674                | -0.290909 | -0.683307 |
| 3             | 6             | 0           | 0.670985                | 0.742337  | 0.183770  |
| 4             | 6             | 0           | -0.828276               | 0.756554  | -0.294910 |
| 5             | 1             | 0           | 0.645158                | 0.387882  | 1.214941  |
| 6             | 6             | 0           | 1.298686                | 2.118758  | 0.210299  |
| 7             | 6             | 0           | 1.168914                | 2.898464  | 1.360830  |
| 8             | 6             | 0           | 1.961282                | 2.659466  | -0.894291 |
| 9             | 6             | 0           | 1.676039                | 4.193492  | 1.408155  |
| 10            | 1             | 0           | 0.662100                | 2.482708  | 2.227441  |
| 11            | 6             | 0           | 2.470977                | 3.954074  | -0.850684 |
| 12            | 1             | 0           | 2.085270                | 2.068372  | -1.795664 |
| 13            | 6             | 0           | 2.327374                | 4.726448  | 0.299136  |
| 14            | 1             | 0           | 1.565368                | 4.784065  | 2.310175  |
| 15            | 1             | 0           | 2.984323                | 4.358632  | -1.715425 |
| 16            | 1             | 0           | 2.725752                | 5.733623  | 0.332300  |

|    |   |   |           |           |           |
|----|---|---|-----------|-----------|-----------|
| 17 | 6 | 0 | 0.496778  | -2.424738 | -1.818217 |
| 18 | 8 | 0 | 0.655271  | -1.949978 | -2.917060 |
| 19 | 8 | 0 | 0.194040  | -3.697587 | -1.609895 |
| 20 | 6 | 0 | -0.149730 | -4.443206 | -2.779116 |
| 21 | 1 | 0 | 0.684410  | -4.462136 | -3.480271 |
| 22 | 1 | 0 | -0.379132 | -5.447278 | -2.433344 |
| 23 | 1 | 0 | -1.022470 | -3.993591 | -3.253319 |
| 24 | 6 | 0 | 2.896026  | -0.420747 | -0.420097 |
| 25 | 6 | 0 | 3.713807  | -0.893779 | -1.449933 |
| 26 | 6 | 0 | 3.481251  | -0.105003 | 0.806669  |
| 27 | 6 | 0 | 5.082646  | -1.056398 | -1.258963 |
| 28 | 1 | 0 | 3.267362  | -1.131915 | -2.410636 |
| 29 | 6 | 0 | 4.850324  | -0.263495 | 1.000616  |
| 30 | 1 | 0 | 2.872353  | 0.269214  | 1.622726  |
| 31 | 6 | 0 | 5.655607  | -0.740773 | -0.030005 |
| 32 | 1 | 0 | 5.700745  | -1.423273 | -2.070192 |
| 33 | 1 | 0 | 5.288916  | -0.011784 | 1.959311  |
| 34 | 1 | 0 | 6.721803  | -0.860739 | 0.122243  |
| 35 | 1 | 0 | 1.268589  | -0.020275 | -1.731508 |
| 36 | 7 | 0 | -1.085516 | -0.551427 | -0.833544 |
| 37 | 7 | 0 | 0.736943  | -2.360440 | 0.553775  |
| 38 | 6 | 0 | 1.059532  | -2.098209 | 1.850546  |
| 39 | 6 | 0 | -2.279502 | -1.111288 | -0.920393 |
| 40 | 8 | 0 | -2.444081 | -2.301493 | -1.266622 |
| 41 | 8 | 0 | 2.096421  | -2.501018 | 2.363143  |
| 42 | 6 | 0 | -3.530590 | -0.323670 | -0.584682 |
| 43 | 6 | 0 | -4.379328 | -0.802994 | 0.414904  |
| 44 | 6 | 0 | -3.896789 | 0.818095  | -1.296039 |
| 45 | 6 | 0 | -5.551757 | -0.125538 | 0.731801  |
| 46 | 1 | 0 | -4.118712 | -1.717954 | 0.936505  |
| 47 | 6 | 0 | -5.081129 | 1.487091  | -0.995321 |
| 48 | 1 | 0 | -3.273651 | 1.171350  | -2.110436 |
| 49 | 6 | 0 | -5.903634 | 1.024709  | 0.027681  |
| 50 | 1 | 0 | -6.195719 | -0.498379 | 1.520080  |
| 51 | 1 | 0 | -5.361000 | 2.367405  | -1.562222 |
| 52 | 1 | 0 | -6.820279 | 1.550339  | 0.267968  |
| 53 | 6 | 0 | 0.030481  | -1.405945 | 2.706127  |
| 54 | 6 | 0 | 0.473298  | -0.750595 | 3.857126  |
| 55 | 6 | 0 | -1.321217 | -1.369788 | 2.360776  |
| 56 | 6 | 0 | -0.423945 | -0.042980 | 4.647899  |
| 57 | 1 | 0 | 1.525838  | -0.792401 | 4.111303  |
| 58 | 6 | 0 | -2.220649 | -0.675668 | 3.165772  |
| 59 | 1 | 0 | -1.655522 | -1.888225 | 1.468491  |
| 60 | 6 | 0 | -1.772894 | -0.005601 | 4.301741  |
| 61 | 1 | 0 | -0.074127 | 0.477749  | 5.531399  |
| 62 | 1 | 0 | -3.271792 | -0.649453 | 2.906023  |
| 63 | 1 | 0 | -2.475957 | 0.542585  | 4.917866  |
| 64 | 6 | 0 | -1.011023 | 1.909992  | -1.277485 |
| 65 | 8 | 0 | -1.462435 | 2.988108  | -0.974472 |
| 66 | 8 | 0 | -0.579333 | 1.621869  | -2.506867 |
| 67 | 6 | 0 | -0.623342 | 2.698941  | -3.450560 |
| 68 | 1 | 0 | 0.004115  | 3.521311  | -3.103979 |
| 69 | 1 | 0 | -0.241445 | 2.291683  | -4.382327 |
| 70 | 1 | 0 | -1.647886 | 3.048881  | -3.577089 |
| 71 | 1 | 0 | -1.462016 | 1.012511  | 0.563534  |

### 3a Anion R,S

Standard orientation:

| Center Number | Atomic Number | Atomic Type | Coordinates (Angstroms) |           |           |
|---------------|---------------|-------------|-------------------------|-----------|-----------|
|               |               |             | X                       | Y         | Z         |
| 1             | 6             | 0           | -0.698575               | -0.066110 | 0.732813  |
| 2             | 6             | 0           | -0.123490               | -1.324262 | -0.017987 |
| 3             | 6             | 0           | 1.369937                | -1.312368 | 0.313575  |
| 4             | 6             | 0           | 1.700498                | 0.205843  | 0.232925  |
| 5             | 1             | 0           | 1.509354                | -1.577565 | 1.362205  |
| 6             | 6             | 0           | 2.262070                | -2.196891 | -0.526673 |
| 7             | 6             | 0           | 1.973036                | -2.510519 | -1.856878 |

|    |   |   |           |           |           |
|----|---|---|-----------|-----------|-----------|
| 8  | 6 | 0 | 3.444118  | -2.687527 | 0.034245  |
| 9  | 6 | 0 | 2.852346  | -3.286006 | -2.609065 |
| 10 | 1 | 0 | 1.060375  | -2.150407 | -2.317431 |
| 11 | 6 | 0 | 4.324682  | -3.460910 | -0.714523 |
| 12 | 1 | 0 | 3.675159  | -2.455798 | 1.069356  |
| 13 | 6 | 0 | 4.031435  | -3.760409 | -2.042668 |
| 14 | 1 | 0 | 2.612030  | -3.521009 | -3.639440 |
| 15 | 1 | 0 | 5.236650  | -3.831565 | -0.261300 |
| 16 | 1 | 0 | 4.713671  | -4.364287 | -2.629214 |
| 17 | 6 | 0 | -0.920164 | -0.490227 | 2.209279  |
| 18 | 8 | 0 | -0.008249 | -0.692453 | 2.977758  |
| 19 | 8 | 0 | -2.189849 | -0.709234 | 2.526919  |
| 20 | 6 | 0 | -2.411658 | -1.240397 | 3.837622  |
| 21 | 1 | 0 | -2.038010 | -0.551521 | 4.594842  |
| 22 | 1 | 0 | -3.487559 | -1.360331 | 3.928575  |
| 23 | 1 | 0 | -1.909257 | -2.203280 | 3.939346  |
| 24 | 6 | 0 | 2.063290  | 0.564964  | -1.202858 |
| 25 | 8 | 0 | 1.286739  | 0.692089  | -2.113731 |
| 26 | 8 | 0 | 3.387850  | 0.644953  | -1.341435 |
| 27 | 6 | 0 | 3.862716  | 0.842676  | -2.678877 |
| 28 | 1 | 0 | 3.479402  | 1.782389  | -3.076700 |
| 29 | 1 | 0 | 4.946001  | 0.871200  | -2.607289 |
| 30 | 1 | 0 | 3.540972  | 0.014906  | -3.311725 |
| 31 | 6 | 0 | -0.866823 | -2.607410 | 0.251734  |
| 32 | 6 | 0 | -1.962184 | -2.935037 | -0.552176 |
| 33 | 6 | 0 | -0.527279 | -3.467014 | 1.299992  |
| 34 | 6 | 0 | -2.710047 | -4.082296 | -0.309295 |
| 35 | 1 | 0 | -2.230814 | -2.271992 | -1.367390 |
| 36 | 6 | 0 | -1.273866 | -4.617377 | 1.544975  |
| 37 | 1 | 0 | 0.319813  | -3.242227 | 1.938233  |
| 38 | 6 | 0 | -2.368789 | -4.927425 | 0.744011  |
| 39 | 1 | 0 | -3.557491 | -4.318026 | -0.942693 |
| 40 | 1 | 0 | -0.996152 | -5.272444 | 2.362732  |
| 41 | 1 | 0 | -2.948090 | -5.823112 | 0.935210  |
| 42 | 1 | 0 | -0.259313 | -1.060530 | -1.068888 |
| 43 | 7 | 0 | 0.478011  | 0.826966  | 0.718408  |
| 44 | 7 | 0 | -1.904070 | 0.360352  | 0.116533  |
| 45 | 6 | 0 | -2.051782 | 1.508073  | -0.509170 |
| 46 | 6 | 0 | 0.442279  | 1.975009  | 1.443234  |
| 47 | 8 | 0 | -0.460160 | 2.225506  | 2.230295  |
| 48 | 8 | 0 | -1.264337 | 2.477760  | -0.660731 |
| 49 | 6 | 0 | 1.572014  | 2.933377  | 1.214794  |
| 50 | 6 | 0 | 2.320052  | 3.403561  | 2.292580  |
| 51 | 6 | 0 | 1.831651  | 3.390974  | -0.077201 |
| 52 | 6 | 0 | 3.351685  | 4.311050  | 2.072982  |
| 53 | 1 | 0 | 2.096698  | 3.052460  | 3.293810  |
| 54 | 6 | 0 | 2.853482  | 4.311638  | -0.289845 |
| 55 | 1 | 0 | 1.199657  | 3.042571  | -0.887695 |
| 56 | 6 | 0 | 3.619071  | 4.763898  | 0.782544  |
| 57 | 1 | 0 | 3.944497  | 4.667779  | 2.906886  |
| 58 | 1 | 0 | 3.049765  | 4.679382  | -1.290308 |
| 59 | 1 | 0 | 4.419662  | 5.474740  | 0.614672  |
| 60 | 6 | 0 | -3.435734 | 1.655506  | -1.148310 |
| 61 | 6 | 0 | -3.802111 | 2.883308  | -1.701381 |
| 62 | 6 | 0 | -4.346192 | 0.596713  | -1.209400 |
| 63 | 6 | 0 | -5.050035 | 3.056312  | -2.296476 |
| 64 | 1 | 0 | -3.090657 | 3.698849  | -1.656640 |
| 65 | 6 | 0 | -5.591203 | 0.762311  | -1.808819 |
| 66 | 1 | 0 | -4.057066 | -0.354539 | -0.779797 |
| 67 | 6 | 0 | -5.949186 | 1.994836  | -2.353562 |
| 68 | 1 | 0 | -5.320218 | 4.018482  | -2.717380 |
| 69 | 1 | 0 | -6.285187 | -0.069940 | -1.851896 |
| 70 | 1 | 0 | -6.919574 | 2.125090  | -2.818979 |
| 71 | 1 | 0 | 2.550664  | 0.453345  | 0.868860  |

### 3a Anion S,R

Standard orientation:

| Center<br>Number | Atomic<br>Number | Atomic<br>Type | Coordinates (Angstroms) |           |           |
|------------------|------------------|----------------|-------------------------|-----------|-----------|
|                  |                  |                | X                       | Y         | Z         |
| 1                | 6                | 0              | -0.569712               | -0.174546 | 0.483007  |
| 2                | 6                | 0              | -0.450470               | 1.320650  | 0.040929  |
| 3                | 6                | 0              | 1.033679                | 1.540233  | -0.353603 |
| 4                | 6                | 0              | 1.727431                | 0.161725  | -0.199255 |
| 5                | 1                | 0              | 1.049713                | 1.784160  | -1.419270 |
| 6                | 6                | 0              | 1.711334                | 2.697501  | 0.358400  |
| 7                | 6                | 0              | 1.002073                | 3.894029  | 0.516194  |
| 8                | 6                | 0              | 3.033707                | 2.651206  | 0.802152  |
| 9                | 6                | 0              | 1.587089                | 5.001313  | 1.118751  |
| 10               | 1                | 0              | -0.021118               | 3.961313  | 0.160557  |
| 11               | 6                | 0              | 3.621405                | 3.759893  | 1.410694  |
| 12               | 1                | 0              | 3.628768                | 1.755537  | 0.670998  |
| 13               | 6                | 0              | 2.901657                | 4.937108  | 1.575680  |
| 14               | 1                | 0              | 1.015270                | 5.914999  | 1.232545  |
| 15               | 1                | 0              | 4.647749                | 3.697618  | 1.753614  |
| 16               | 1                | 0              | 3.358935                | 5.797151  | 2.050226  |
| 17               | 6                | 0              | -0.231030               | -0.247670 | 1.996802  |
| 18               | 8                | 0              | 0.352623                | 0.613510  | 2.611777  |
| 19               | 8                | 0              | -0.508554               | -1.445989 | 2.510304  |
| 20               | 6                | 0              | -0.178085               | -1.619614 | 3.891593  |
| 21               | 1                | 0              | -0.724286               | -0.897717 | 4.499181  |
| 22               | 1                | 0              | -0.479198               | -2.632589 | 4.143211  |
| 23               | 1                | 0              | 0.892856                | -1.490095 | 4.049072  |
| 24               | 6                | 0              | 2.619555                | -0.086788 | -1.410017 |
| 25               | 8                | 0              | 2.204048                | -0.320715 | -2.516431 |
| 26               | 8                | 0              | 3.906999                | 0.040757  | -1.108359 |
| 27               | 6                | 0              | 4.826900                | -0.144001 | -2.194718 |
| 28               | 1                | 0              | 4.651222                | 0.606110  | -2.965117 |
| 29               | 1                | 0              | 5.816860                | -0.028114 | -1.763728 |
| 30               | 1                | 0              | 4.703662                | -1.143126 | -2.612164 |
| 31               | 6                | 0              | -1.410659               | 1.655648  | -1.077816 |
| 32               | 6                | 0              | -2.522917               | 2.456202  | -0.824420 |
| 33               | 6                | 0              | -1.225152               | 1.154242  | -2.370412 |
| 34               | 6                | 0              | -3.434075               | 2.754783  | -1.837053 |
| 35               | 1                | 0              | -2.683133               | 2.834568  | 0.179756  |
| 36               | 6                | 0              | -2.132980               | 1.445768  | -3.381483 |
| 37               | 1                | 0              | -0.370796               | 0.516656  | -2.580476 |
| 38               | 6                | 0              | -3.242447               | 2.249279  | -3.118254 |
| 39               | 1                | 0              | -4.292440               | 3.381113  | -1.622219 |
| 40               | 1                | 0              | -1.978680               | 1.044037  | -4.376508 |
| 41               | 1                | 0              | -3.948902               | 2.478712  | -3.907505 |
| 42               | 1                | 0              | -0.702630               | 1.927564  | 0.907146  |
| 43               | 7                | 0              | 0.629711                | -0.805818 | -0.149305 |
| 44               | 7                | 0              | -1.794126               | -0.798911 | 0.128573  |
| 45               | 6                | 0              | -2.800651               | -0.382551 | 0.862230  |
| 46               | 6                | 0              | 0.855973                | -2.162018 | -0.217179 |
| 47               | 8                | 0              | -0.012783               | -3.010562 | -0.277472 |
| 48               | 8                | 0              | -2.744716               | 0.429140  | 1.831046  |
| 49               | 6                | 0              | 2.301264                | -2.599178 | -0.189649 |
| 50               | 6                | 0              | 2.854629                | -3.273501 | -1.276523 |
| 51               | 6                | 0              | 3.051143                | -2.409270 | 0.970364  |
| 52               | 6                | 0              | 4.167277                | -3.728959 | -1.212416 |
| 53               | 1                | 0              | 2.261637                | -3.424651 | -2.171495 |
| 54               | 6                | 0              | 4.356436                | -2.885017 | 1.040588  |
| 55               | 1                | 0              | 2.612251                | -1.896892 | 1.821213  |
| 56               | 6                | 0              | 4.918457                | -3.534662 | -0.055093 |

|    |   |   |           |           |           |
|----|---|---|-----------|-----------|-----------|
| 57 | 1 | 0 | 4.603646  | -4.237346 | -2.064100 |
| 58 | 1 | 0 | 4.933991  | -2.744970 | 1.946412  |
| 59 | 1 | 0 | 5.939496  | -3.894045 | -0.005988 |
| 60 | 6 | 0 | -4.157824 | -0.938539 | 0.478274  |
| 61 | 6 | 0 | -5.291013 | -0.510411 | 1.170939  |
| 62 | 6 | 0 | -4.311994 | -1.858943 | -0.562448 |
| 63 | 6 | 0 | -6.554917 | -0.989782 | 0.834902  |
| 64 | 1 | 0 | -5.163712 | 0.204340  | 1.974679  |
| 65 | 6 | 0 | -5.572547 | -2.341380 | -0.899280 |
| 66 | 1 | 0 | -3.431279 | -2.189280 | -1.099107 |
| 67 | 6 | 0 | -6.699364 | -1.907641 | -0.201859 |
| 68 | 1 | 0 | -7.426549 | -0.647124 | 1.381142  |
| 69 | 1 | 0 | -5.678603 | -3.056706 | -1.707149 |
| 70 | 1 | 0 | -7.681560 | -2.282776 | -0.465723 |
| 71 | 1 | 0 | 2.331735  | 0.134865  | 0.708874  |

### 3a Anion S,S

Standard orientation:

| Center<br>Number | Atomic<br>Number | Atomic<br>Type | Coordinates (Angstroms) |           |           |
|------------------|------------------|----------------|-------------------------|-----------|-----------|
|                  |                  |                | X                       | Y         | Z         |
| 1                | 6                | 0              | -0.698575               | -0.066110 | 0.732813  |
| 2                | 6                | 0              | -0.123490               | -1.324262 | -0.017987 |
| 3                | 6                | 0              | 1.369937                | -1.312368 | 0.313575  |
| 4                | 6                | 0              | 1.700498                | 0.205843  | 0.232925  |
| 5                | 1                | 0              | 1.509354                | -1.577565 | 1.362205  |
| 6                | 6                | 0              | 2.262070                | -2.196891 | -0.526673 |
| 7                | 6                | 0              | 1.973036                | -2.510519 | -1.856878 |
| 8                | 6                | 0              | 3.444118                | -2.687527 | 0.034245  |
| 9                | 6                | 0              | 2.852346                | -3.286006 | -2.609065 |
| 10               | 1                | 0              | 1.060375                | -2.150407 | -2.317431 |
| 11               | 6                | 0              | 4.324682                | -3.460910 | -0.714523 |
| 12               | 1                | 0              | 3.675159                | -2.455798 | 1.069356  |
| 13               | 6                | 0              | 4.031435                | -3.760409 | -2.042668 |
| 14               | 1                | 0              | 2.612030                | -3.521009 | -3.639440 |
| 15               | 1                | 0              | 5.236650                | -3.831565 | -0.261300 |
| 16               | 1                | 0              | 4.713671                | -4.364287 | -2.629214 |
| 17               | 6                | 0              | -0.920164               | -0.490227 | 2.209279  |
| 18               | 8                | 0              | -0.008249               | -0.692453 | 2.977758  |
| 19               | 8                | 0              | -2.189849               | -0.709234 | 2.526919  |
| 20               | 6                | 0              | -2.411658               | -1.240397 | 3.837622  |
| 21               | 1                | 0              | -2.038010               | -0.551521 | 4.594842  |
| 22               | 1                | 0              | -3.487559               | -1.360331 | 3.928575  |
| 23               | 1                | 0              | -1.909257               | -2.203280 | 3.939346  |
| 24               | 6                | 0              | 2.063290                | 0.564964  | -1.202858 |
| 25               | 8                | 0              | 1.286739                | 0.692089  | -2.113731 |
| 26               | 8                | 0              | 3.387850                | 0.644953  | -1.341435 |
| 27               | 6                | 0              | 3.862716                | 0.842676  | -2.678877 |
| 28               | 1                | 0              | 3.479402                | 1.782389  | -3.076700 |
| 29               | 1                | 0              | 4.946001                | 0.871200  | -2.607289 |
| 30               | 1                | 0              | 3.540972                | 0.014906  | -3.311725 |
| 31               | 6                | 0              | -0.866823               | -2.607410 | 0.251734  |
| 32               | 6                | 0              | -1.962184               | -2.935037 | -0.552176 |
| 33               | 6                | 0              | -0.527279               | -3.467014 | 1.299992  |
| 34               | 6                | 0              | -2.710047               | -4.082296 | -0.309295 |
| 35               | 1                | 0              | -2.230814               | -2.271992 | -1.367390 |
| 36               | 6                | 0              | -1.273866               | -4.617377 | 1.544975  |
| 37               | 1                | 0              | 0.319813                | -3.242227 | 1.938233  |
| 38               | 6                | 0              | -2.368789               | -4.927425 | 0.744011  |
| 39               | 1                | 0              | -3.557491               | -4.318026 | -0.942693 |
| 40               | 1                | 0              | -0.996152               | -5.272444 | 2.362732  |
| 41               | 1                | 0              | -2.948090               | -5.823112 | 0.935210  |



|    |   |   |           |           |           |
|----|---|---|-----------|-----------|-----------|
| 42 | 1 | 0 | -0.259313 | -1.060530 | -1.068888 |
| 43 | 7 | 0 | 0.478011  | 0.826966  | 0.718408  |
| 44 | 7 | 0 | -1.904070 | 0.360352  | 0.116533  |
| 45 | 6 | 0 | -2.051782 | 1.508073  | -0.509170 |
| 46 | 6 | 0 | 0.442279  | 1.975009  | 1.443234  |
| 47 | 8 | 0 | -0.460160 | 2.225506  | 2.230295  |
| 48 | 8 | 0 | -1.264337 | 2.477760  | -0.660731 |
| 49 | 6 | 0 | 1.572014  | 2.933377  | 1.214794  |
| 50 | 6 | 0 | 2.320052  | 3.403561  | 2.292580  |
| 51 | 6 | 0 | 1.831651  | 3.390974  | -0.077201 |
| 52 | 6 | 0 | 3.351685  | 4.311050  | 2.072982  |
| 53 | 1 | 0 | 2.096698  | 3.052460  | 3.293810  |
| 54 | 6 | 0 | 2.853482  | 4.311638  | -0.289845 |
| 55 | 1 | 0 | 1.199657  | 3.042571  | -0.887695 |
| 56 | 6 | 0 | 3.619071  | 4.763898  | 0.782544  |
| 57 | 1 | 0 | 3.944497  | 4.667779  | 2.906886  |
| 58 | 1 | 0 | 3.049765  | 4.679382  | -1.290308 |
| 59 | 1 | 0 | 4.419662  | 5.474740  | 0.614672  |
| 60 | 6 | 0 | -3.435734 | 1.655506  | -1.148310 |
| 61 | 6 | 0 | -3.802111 | 2.883308  | -1.701381 |
| 62 | 6 | 0 | -4.346192 | 0.596713  | -1.209400 |
| 63 | 6 | 0 | -5.050035 | 3.056312  | -2.296476 |
| 64 | 1 | 0 | -3.090657 | 3.698849  | -1.656640 |
| 65 | 6 | 0 | -5.591203 | 0.762311  | -1.808819 |
| 66 | 1 | 0 | -4.057066 | -0.354539 | -0.779797 |
| 67 | 6 | 0 | -5.949186 | 1.994836  | -2.353562 |
| 68 | 1 | 0 | -5.320218 | 4.018482  | -2.717380 |
| 69 | 1 | 0 | -6.285187 | -0.069940 | -1.851896 |
| 70 | 1 | 0 | -6.919574 | 2.125090  | -2.818979 |
| 71 | 1 | 0 | 2.550664  | 0.453345  | 0.868860  |

-----

### 3a Anion *R,R*

Standard orientation:

| Center<br>Number | Atomic<br>Number | Atomic<br>Type | Coordinates (Angstroms) |           |           |
|------------------|------------------|----------------|-------------------------|-----------|-----------|
|                  |                  |                | X                       | Y         | Z         |
| 1                | 6                | 0              | -0.569712               | -0.174546 | 0.483007  |
| 2                | 6                | 0              | -0.450470               | 1.320650  | 0.040929  |
| 3                | 6                | 0              | 1.033679                | 1.540233  | -0.353603 |
| 4                | 6                | 0              | 1.727431                | 0.161725  | -0.199255 |
| 5                | 1                | 0              | 1.049713                | 1.784160  | -1.419270 |
| 6                | 6                | 0              | 1.711334                | 2.697501  | 0.358400  |
| 7                | 6                | 0              | 1.002073                | 3.894029  | 0.516194  |
| 8                | 6                | 0              | 3.033707                | 2.651206  | 0.802152  |
| 9                | 6                | 0              | 1.587089                | 5.001313  | 1.118751  |
| 10               | 1                | 0              | -0.021118               | 3.961313  | 0.160557  |
| 11               | 6                | 0              | 3.621405                | 3.759893  | 1.410694  |
| 12               | 1                | 0              | 3.628768                | 1.755537  | 0.670998  |
| 13               | 6                | 0              | 2.901657                | 4.937108  | 1.575680  |
| 14               | 1                | 0              | 1.015270                | 5.914999  | 1.232545  |
| 15               | 1                | 0              | 4.647749                | 3.697618  | 1.753614  |
| 16               | 1                | 0              | 3.358935                | 5.797151  | 2.050226  |
| 17               | 6                | 0              | -0.231030               | -0.247670 | 1.996802  |
| 18               | 8                | 0              | 0.352623                | 0.613510  | 2.611777  |
| 19               | 8                | 0              | -0.508554               | -1.445989 | 2.510304  |
| 20               | 6                | 0              | -0.178085               | -1.619614 | 3.891593  |
| 21               | 1                | 0              | -0.724286               | -0.897717 | 4.499181  |
| 22               | 1                | 0              | -0.479198               | -2.632589 | 4.143211  |
| 23               | 1                | 0              | 0.892856                | -1.490095 | 4.049072  |
| 24               | 6                | 0              | 2.619555                | -0.086788 | -1.410017 |
| 25               | 8                | 0              | 2.204048                | -0.320715 | -2.516431 |
| 26               | 8                | 0              | 3.906999                | 0.040757  | -1.108359 |

|    |   |   |           |           |           |
|----|---|---|-----------|-----------|-----------|
| 27 | 6 | 0 | 4.826900  | -0.144001 | -2.194718 |
| 28 | 1 | 0 | 4.651222  | 0.606110  | -2.965117 |
| 29 | 1 | 0 | 5.816860  | -0.028114 | -1.763728 |
| 30 | 1 | 0 | 4.703662  | -1.143126 | -2.612164 |
| 31 | 6 | 0 | -1.410659 | 1.655648  | -1.077816 |
| 32 | 6 | 0 | -2.522917 | 2.456202  | -0.824420 |
| 33 | 6 | 0 | -1.225152 | 1.154242  | -2.370412 |
| 34 | 6 | 0 | -3.434075 | 2.754783  | -1.837053 |
| 35 | 1 | 0 | -2.683133 | 2.834568  | 0.179756  |
| 36 | 6 | 0 | -2.132980 | 1.445768  | -3.381483 |
| 37 | 1 | 0 | -0.370796 | 0.516656  | -2.580476 |
| 38 | 6 | 0 | -3.242447 | 2.249279  | -3.118254 |
| 39 | 1 | 0 | -4.292440 | 3.381113  | -1.622219 |
| 40 | 1 | 0 | -1.978680 | 1.044037  | -4.376508 |
| 41 | 1 | 0 | -3.948902 | 2.478712  | -3.907505 |
| 42 | 1 | 0 | -0.702630 | 1.927564  | 0.907146  |
| 43 | 7 | 0 | 0.629711  | -0.805818 | -0.149305 |
| 44 | 7 | 0 | -1.794126 | -0.798911 | 0.128573  |
| 45 | 6 | 0 | -2.800651 | -0.382551 | 0.862230  |
| 46 | 6 | 0 | 0.855973  | -2.162018 | -0.217179 |
| 47 | 8 | 0 | -0.012783 | -3.010562 | -0.277472 |
| 48 | 8 | 0 | -2.744716 | 0.429140  | 1.831046  |
| 49 | 6 | 0 | 2.301264  | -2.599178 | -0.189649 |
| 50 | 6 | 0 | 2.854629  | -3.273501 | -1.276523 |
| 51 | 6 | 0 | 3.051143  | -2.409270 | 0.970364  |
| 52 | 6 | 0 | 4.167277  | -3.728959 | -1.212416 |
| 53 | 1 | 0 | 2.261637  | -3.424651 | -2.171495 |
| 54 | 6 | 0 | 4.356436  | -2.885017 | 1.040588  |
| 55 | 1 | 0 | 2.612251  | -1.896892 | 1.821213  |
| 56 | 6 | 0 | 4.918457  | -3.534662 | -0.055093 |
| 57 | 1 | 0 | 4.603646  | -4.237346 | -2.064100 |
| 58 | 1 | 0 | 4.933991  | -2.744970 | 1.946412  |
| 59 | 1 | 0 | 5.939496  | -3.894045 | -0.005988 |
| 60 | 6 | 0 | -4.157824 | -0.938539 | 0.478274  |
| 61 | 6 | 0 | -5.291013 | -0.510411 | 1.170939  |
| 62 | 6 | 0 | -4.311994 | -1.858943 | -0.562448 |
| 63 | 6 | 0 | -6.554917 | -0.989782 | 0.834902  |
| 64 | 1 | 0 | -5.163712 | 0.204340  | 1.974679  |
| 65 | 6 | 0 | -5.572547 | -2.341380 | -0.899280 |
| 66 | 1 | 0 | -3.431279 | -2.189280 | -1.099107 |
| 67 | 6 | 0 | -6.699364 | -1.907641 | -0.201859 |
| 68 | 1 | 0 | -7.426549 | -0.647124 | 1.381142  |
| 69 | 1 | 0 | -5.678603 | -3.056706 | -1.707149 |
| 70 | 1 | 0 | -7.681560 | -2.282776 | -0.465723 |
| 71 | 1 | 0 | 2.331735  | 0.134865  | 0.708874  |

---
